# Supplementary material for: An efficient synthesis of heptaaryldipyrromethenes from tetraarylcyclopentadienones and ammonium acetate and their extension to the corresponding BODIPYs
Source: Royal Society of Chemistry journal article supplement (doi:10.1039/c2ob26509e), 2012-01-01
Supplement: c2ob26509e.pdf [file c2ob26509e.pdf]

**An Efficient Synthesis of Heptaaryldipyrromethenes from Tetraarylcyclopentadienones and Ammonium Acetate  
and Their Extension to Corresponding BODIPYs**

**Jichao Li, Binbin Hu, Gongfang Hu, Xihui Li, Ping Lu,\* and Yanguang Wang\***

*Department of Chemistry, Zhejiang University, Hangzhou 310027, P. R. China*

E-mail: pinglu@zju.edu.cn; orgwyg@zju.edu.cn; Fax: (+86) 571-87952543

## Content

|    |                                                                                    |     |
|----|------------------------------------------------------------------------------------|-----|
| 1. | <sup>1</sup> H NMR and <sup>13</sup> C NMR spectra for <b>1b-1n</b> .....          | S3  |
| 2. | Table S1 Optimization of reaction conditions for the preparation of <b>2</b> ..... | S29 |
| 3. | <sup>1</sup> H NMR and <sup>13</sup> C NMR spectra of <b>2a-2m</b> .....           | S30 |
| 4. | The GC-MS for eliminated aromatic aldehydes.....                                   | S53 |
| 5. | <sup>1</sup> H NMR and <sup>13</sup> C NMR spectra of <b>3a-3p</b> .....           | S55 |
| 6. | <sup>1</sup> H NMR and <sup>13</sup> C NMR spectra of <b>4-5</b> .....             | S82 |
| 7. | UV and FL of heptaaryldipyrromethenes and BODIPYs.....                             | S94 |
| 8. | Absorbance of <b>2c-2i, 2l</b> response to acidity .....                           | S95 |

1.  $^1\text{H}$  NMR and  $^{13}\text{C}$  NMR spectra for **1b-1n**

**Figure S1** The  $^1\text{H}$  NMR spectra of **1b**.

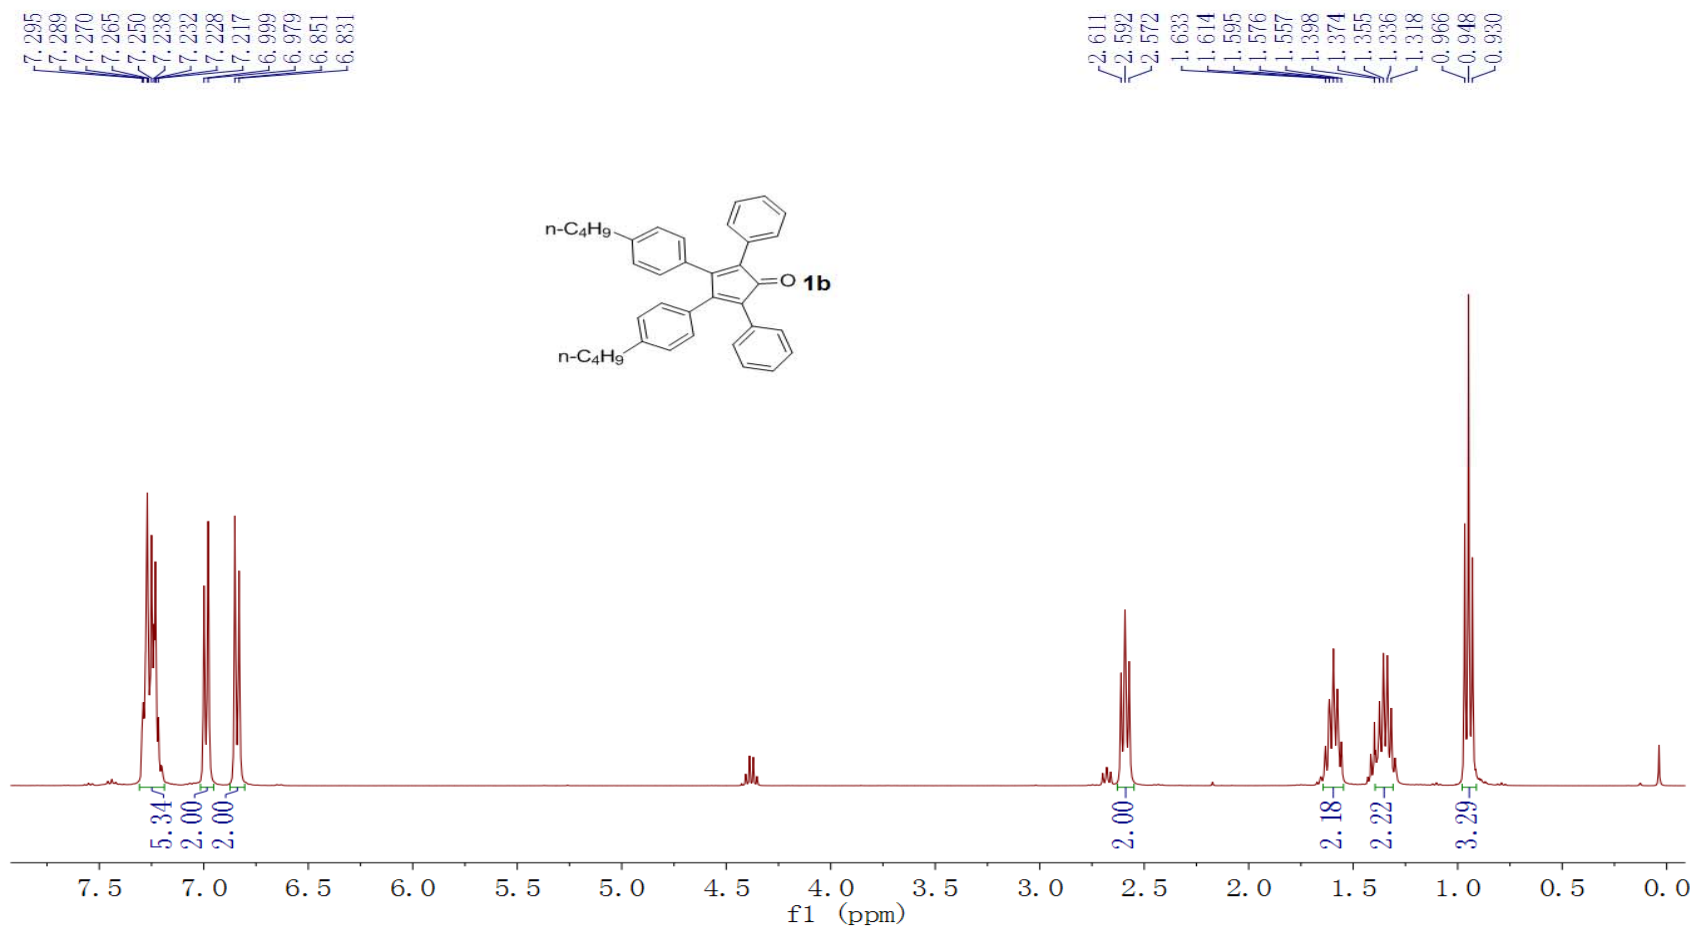

**Figure S2** The  $^{13}\text{C}$  NMR spectra of **1b**.

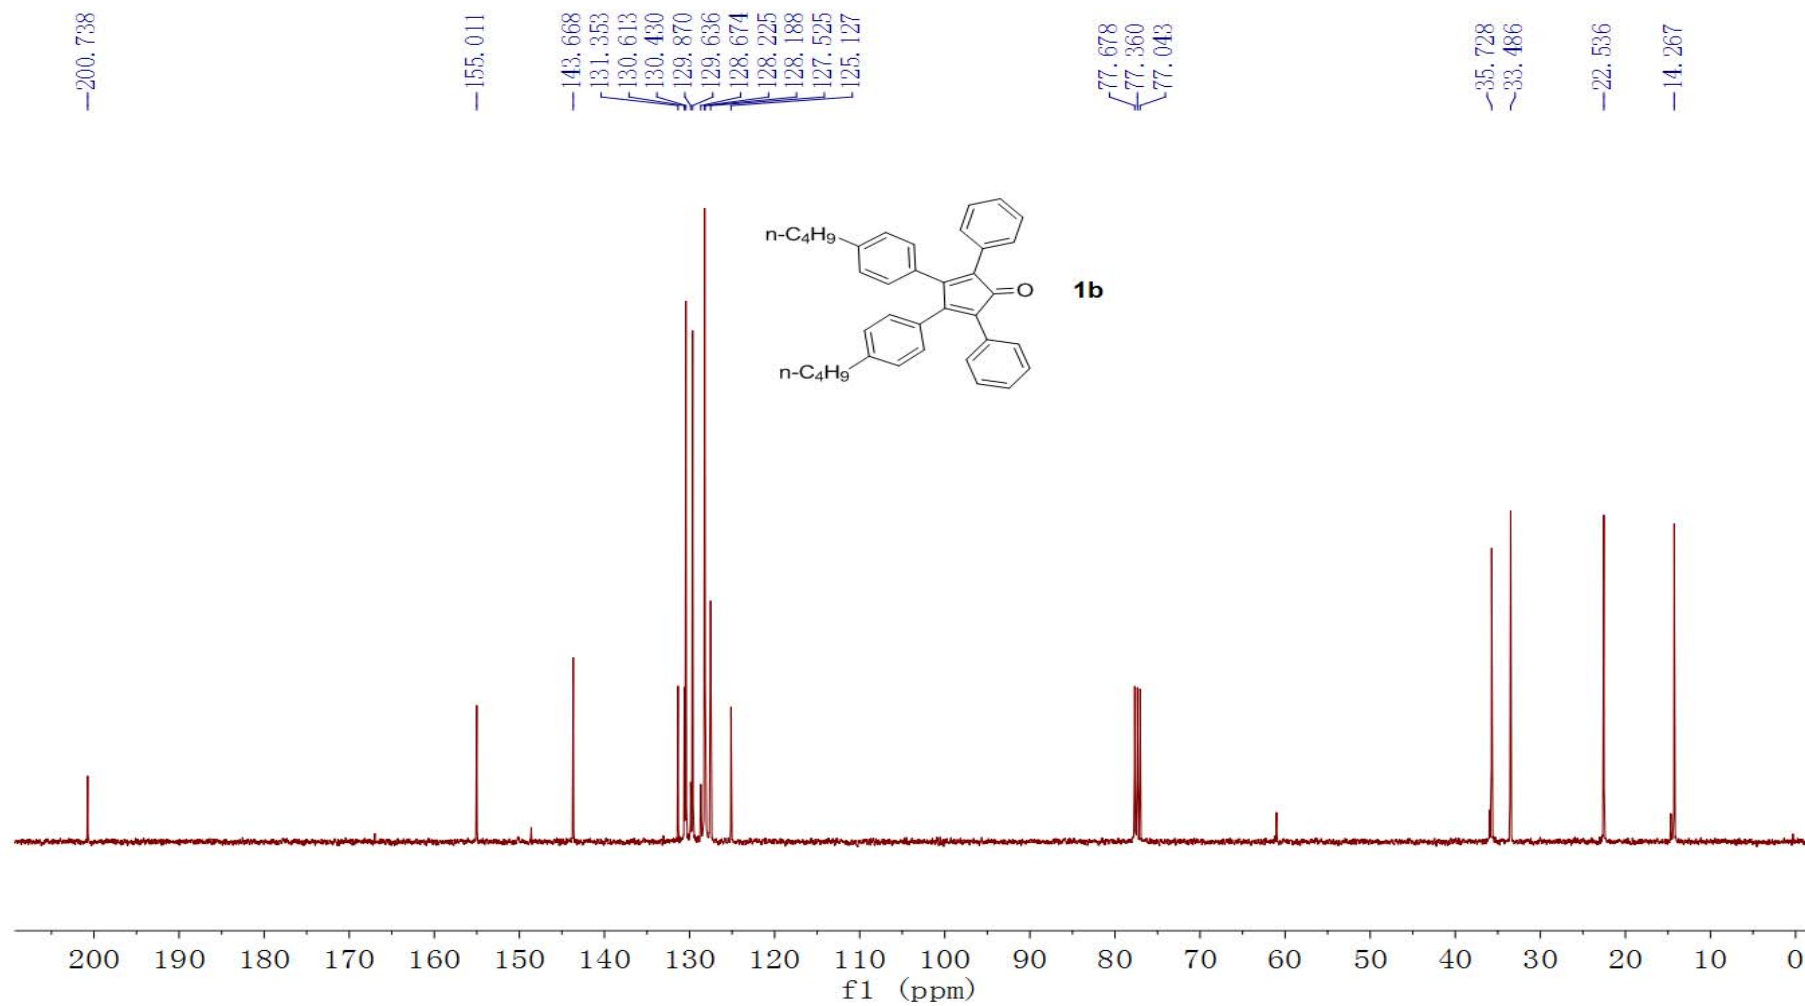



**Figure S3** The  $^1\text{H}$  NMR spectra of **1c**.

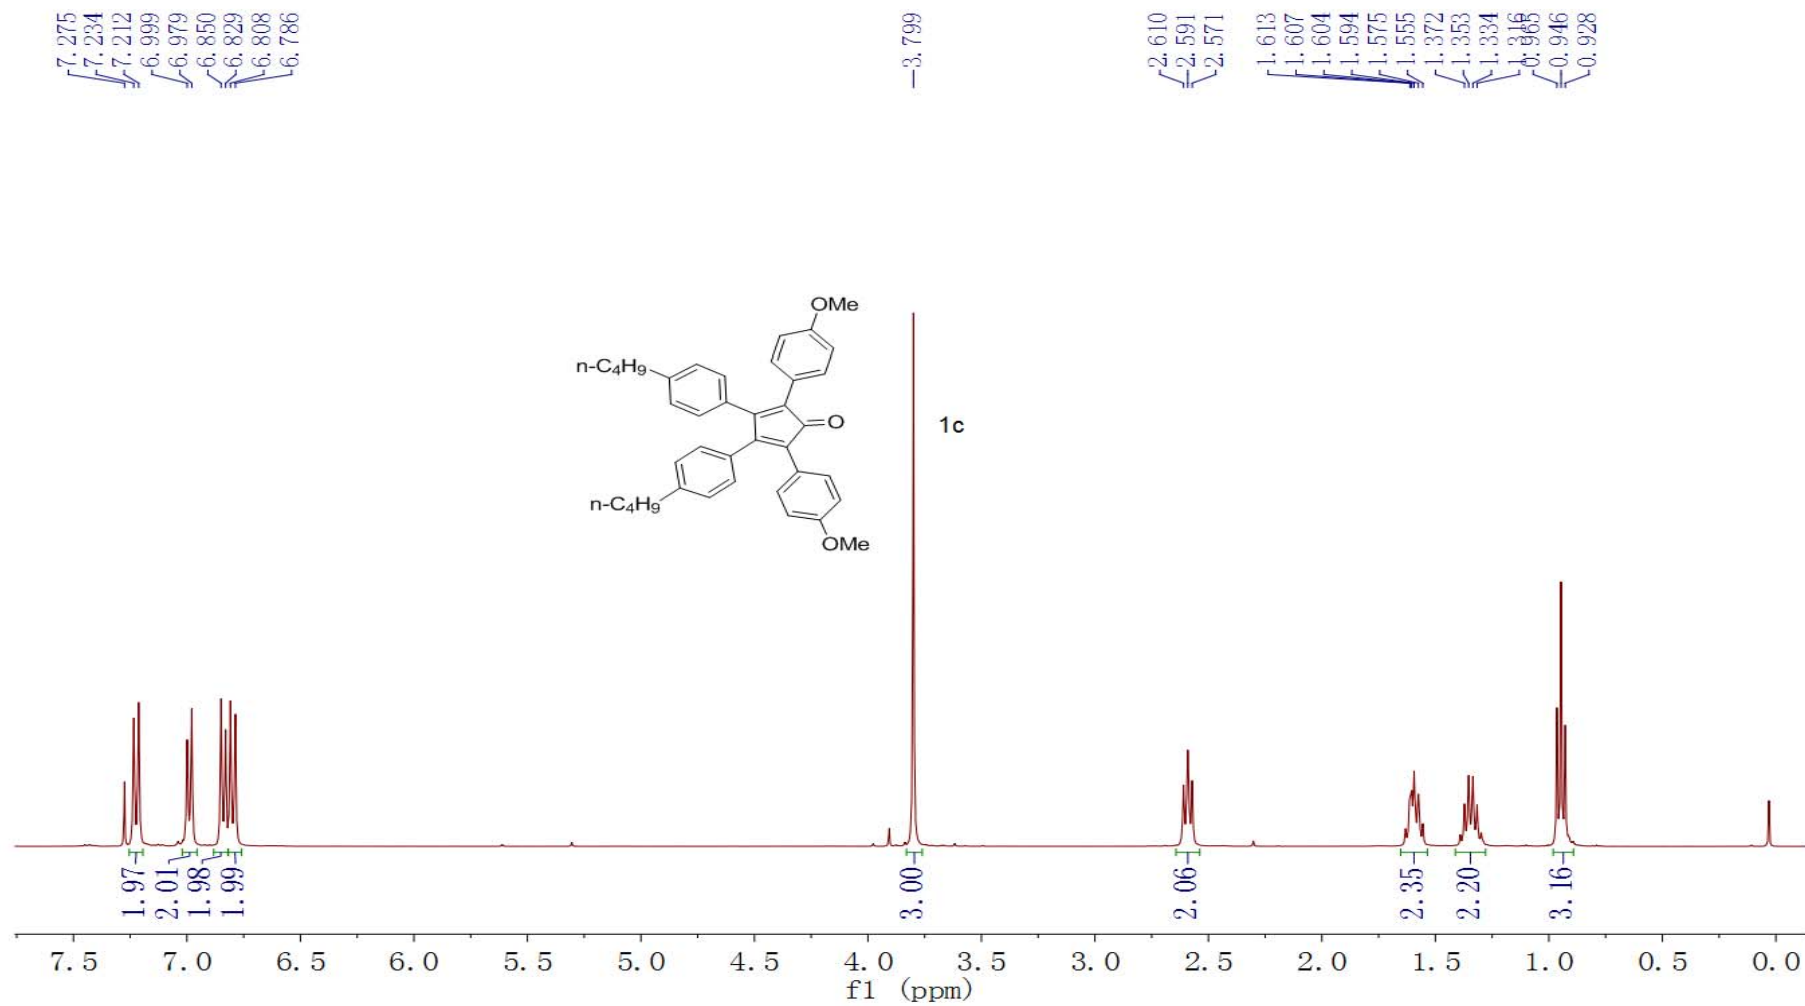

**Figure S4** The  $^{13}\text{C}$  NMR spectra of **1c**.

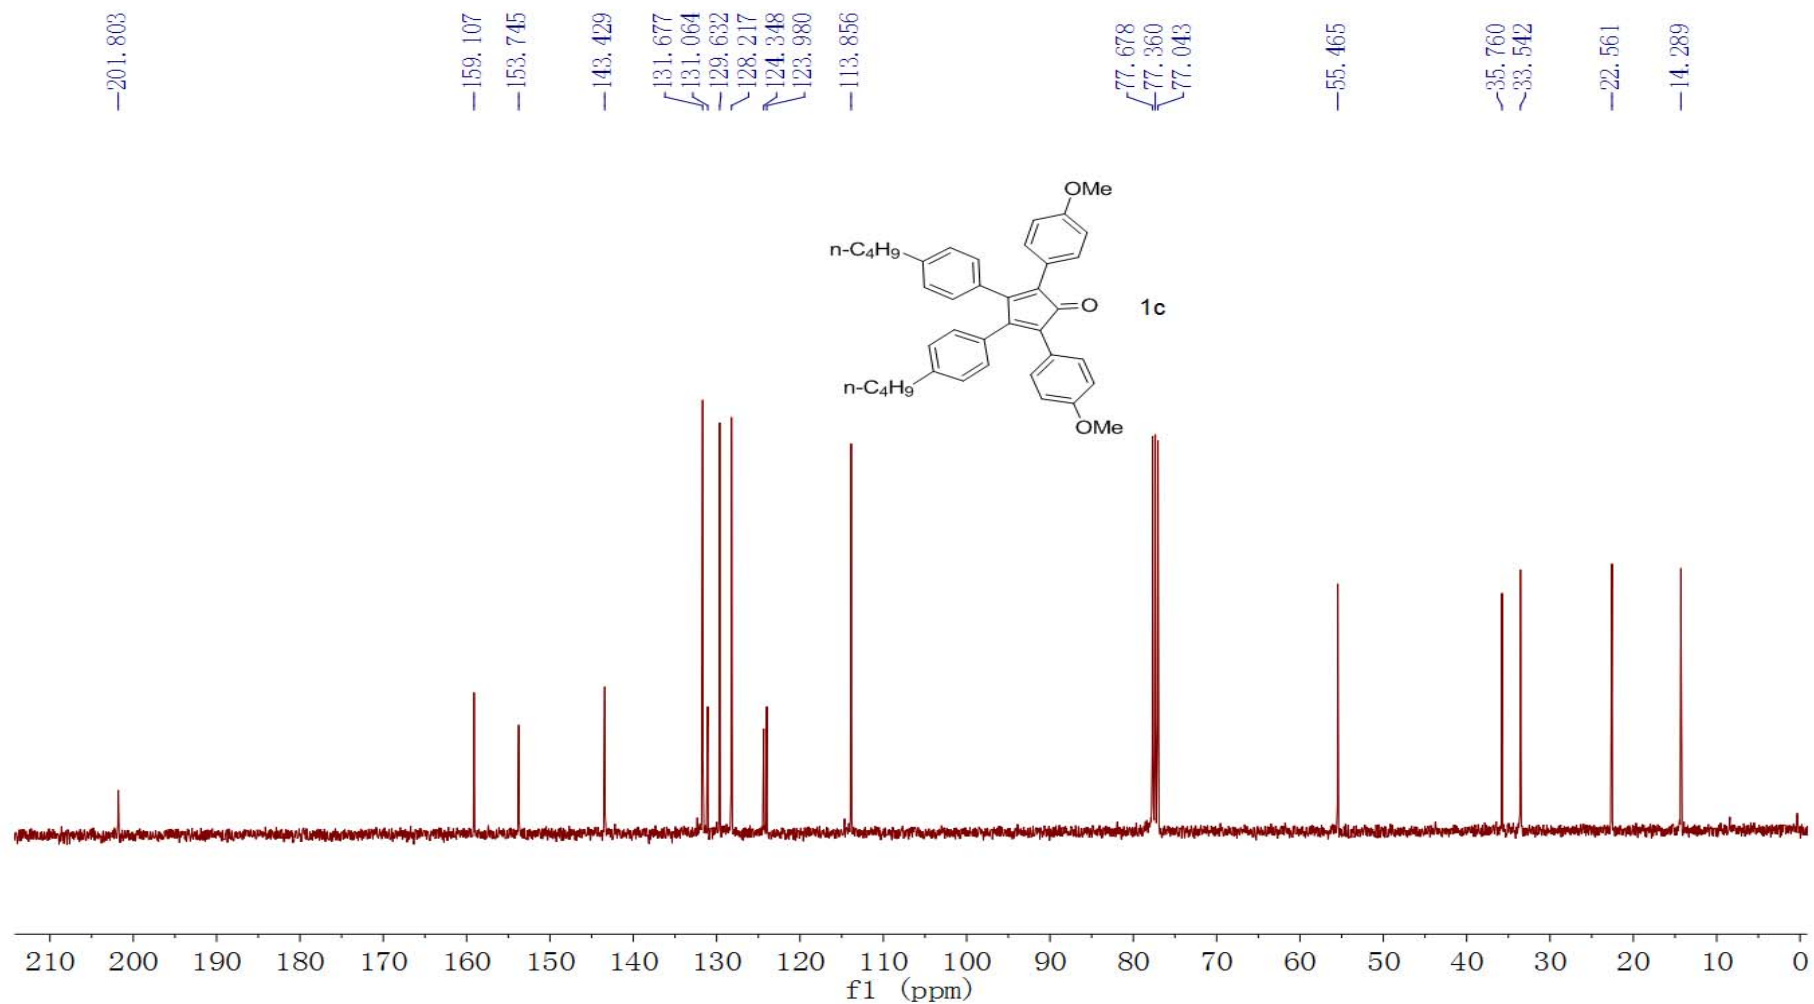

**Figure S5** The  $^1\text{H}$  NMR spectra of **1d**.

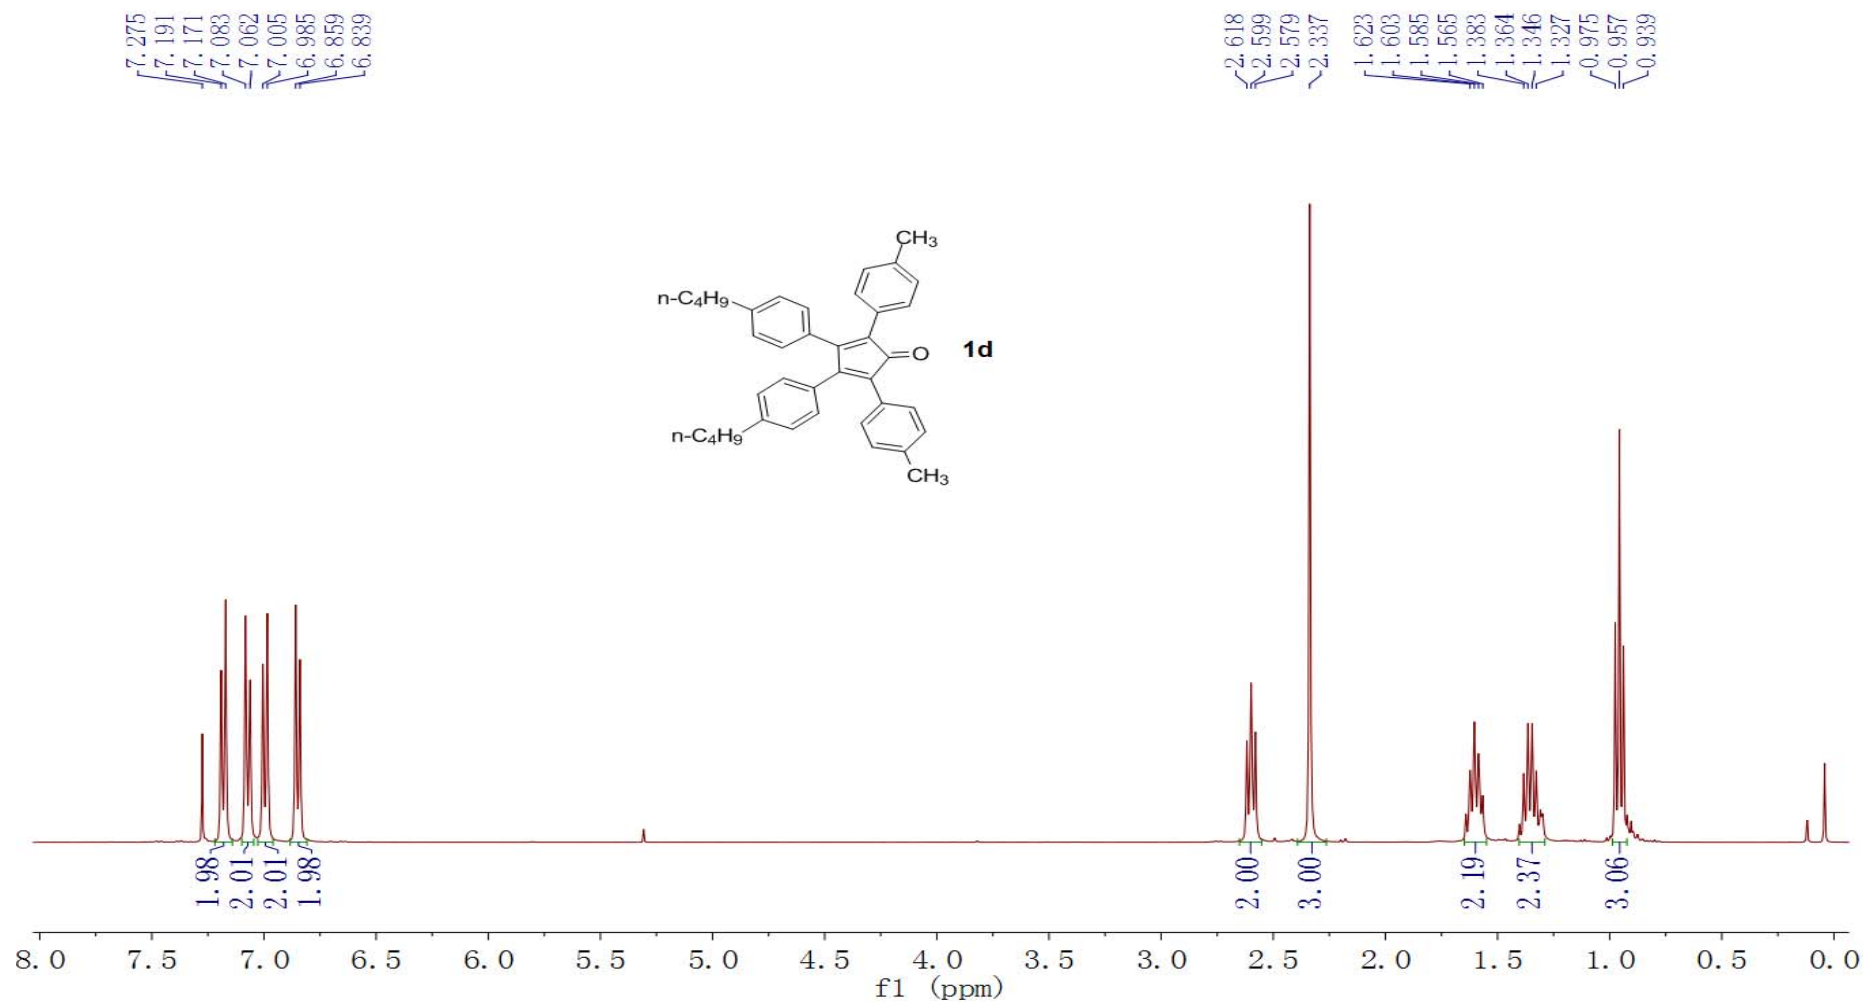

**Figure S6** The  $^{13}\text{C}$  NMR spectra of **1d**.

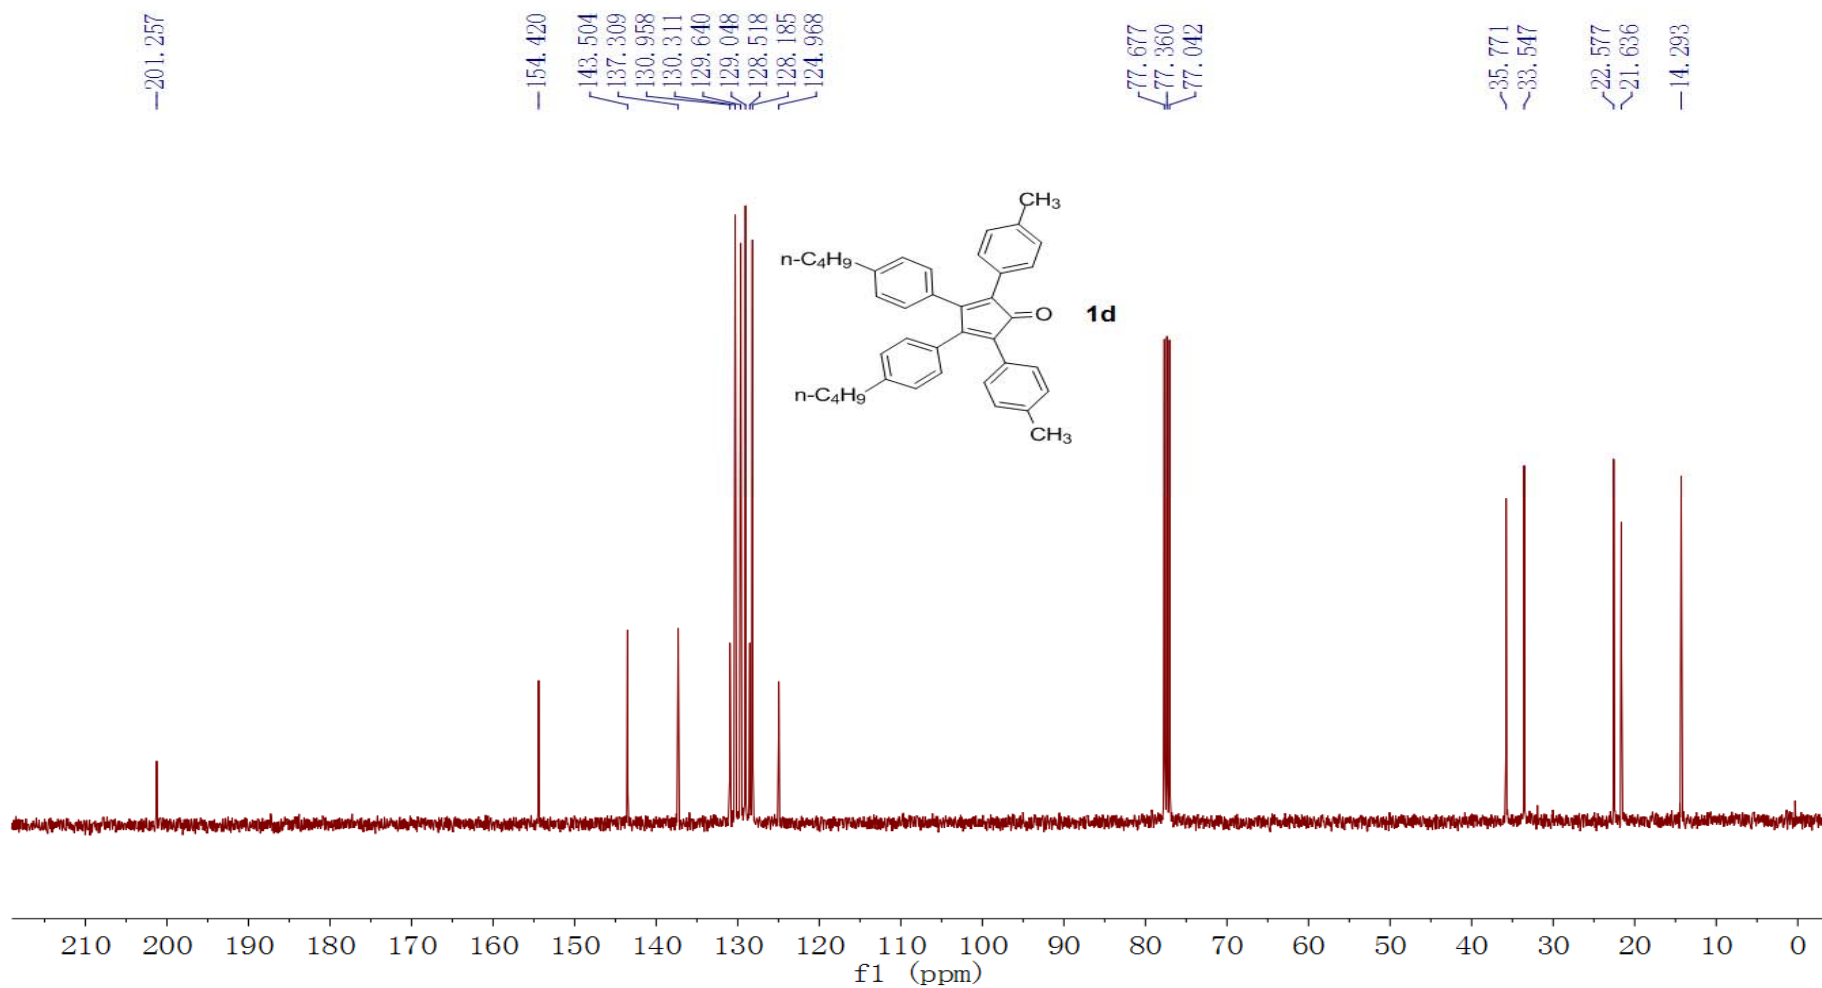

**Figure S7** The <sup>1</sup>H NMR spectra of **1e**.

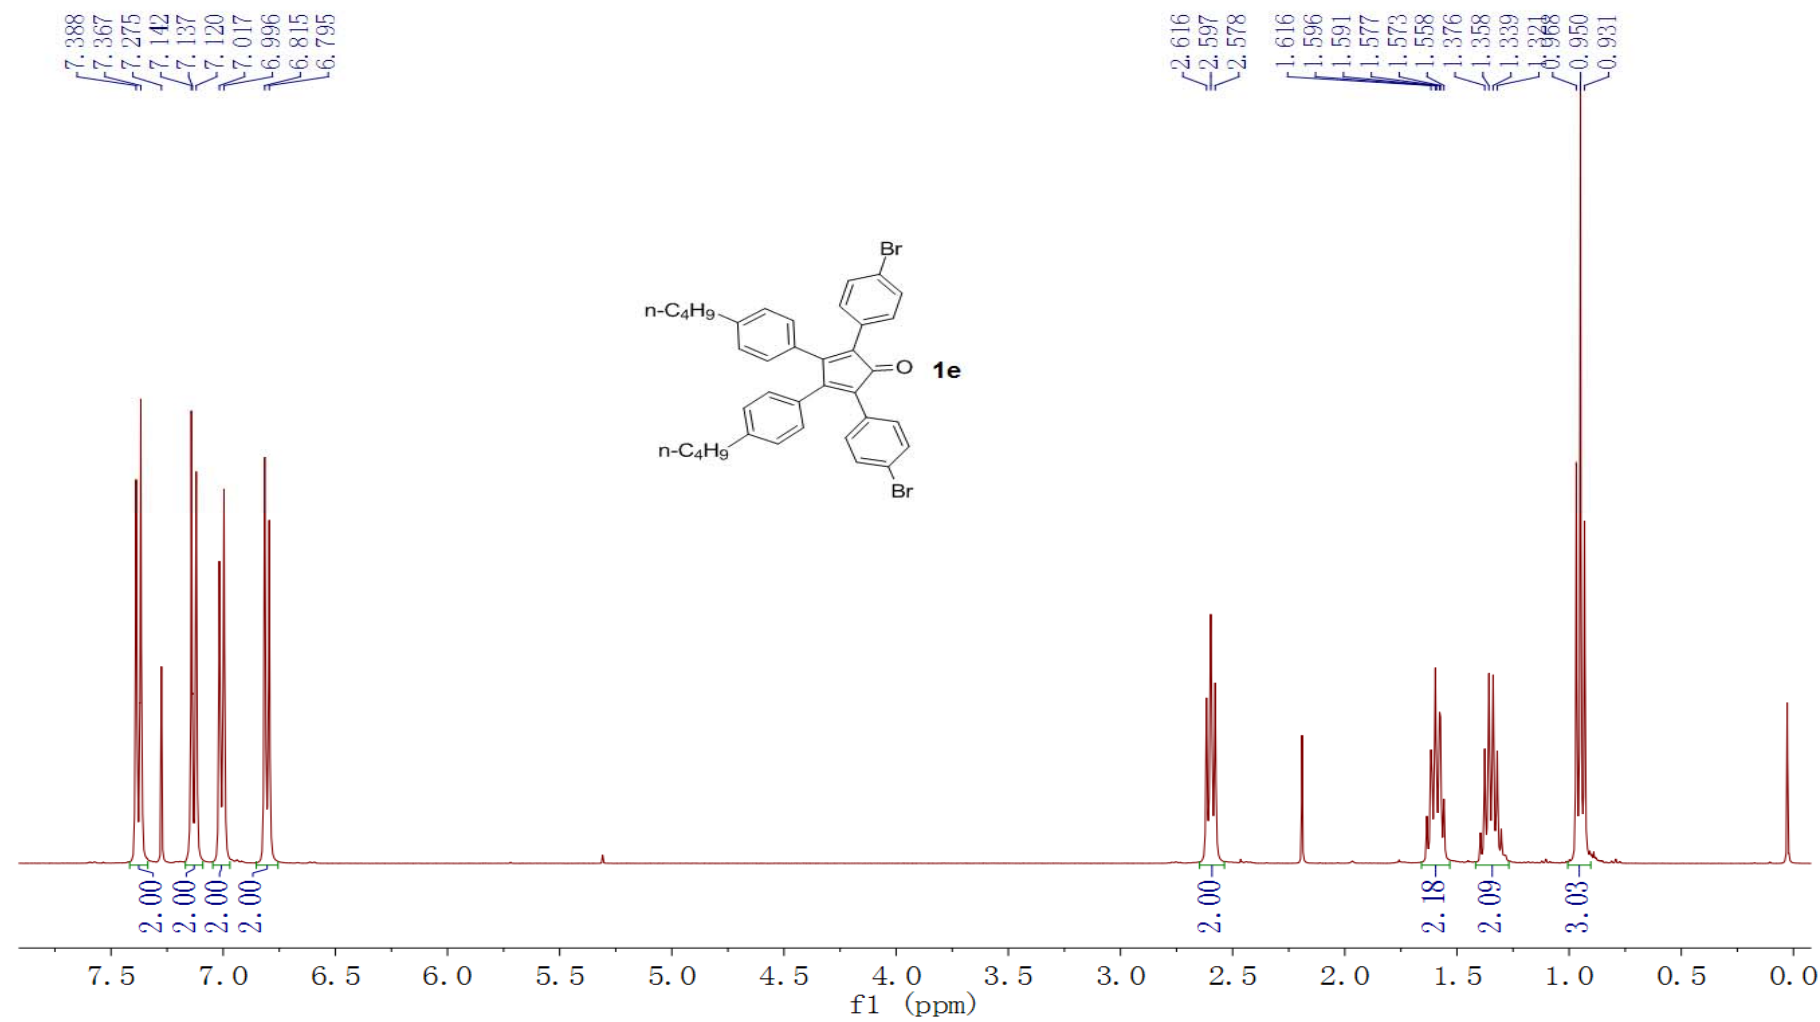

**Figure S8** The  $^{13}\text{C}$  NMR spectra of **1e**.

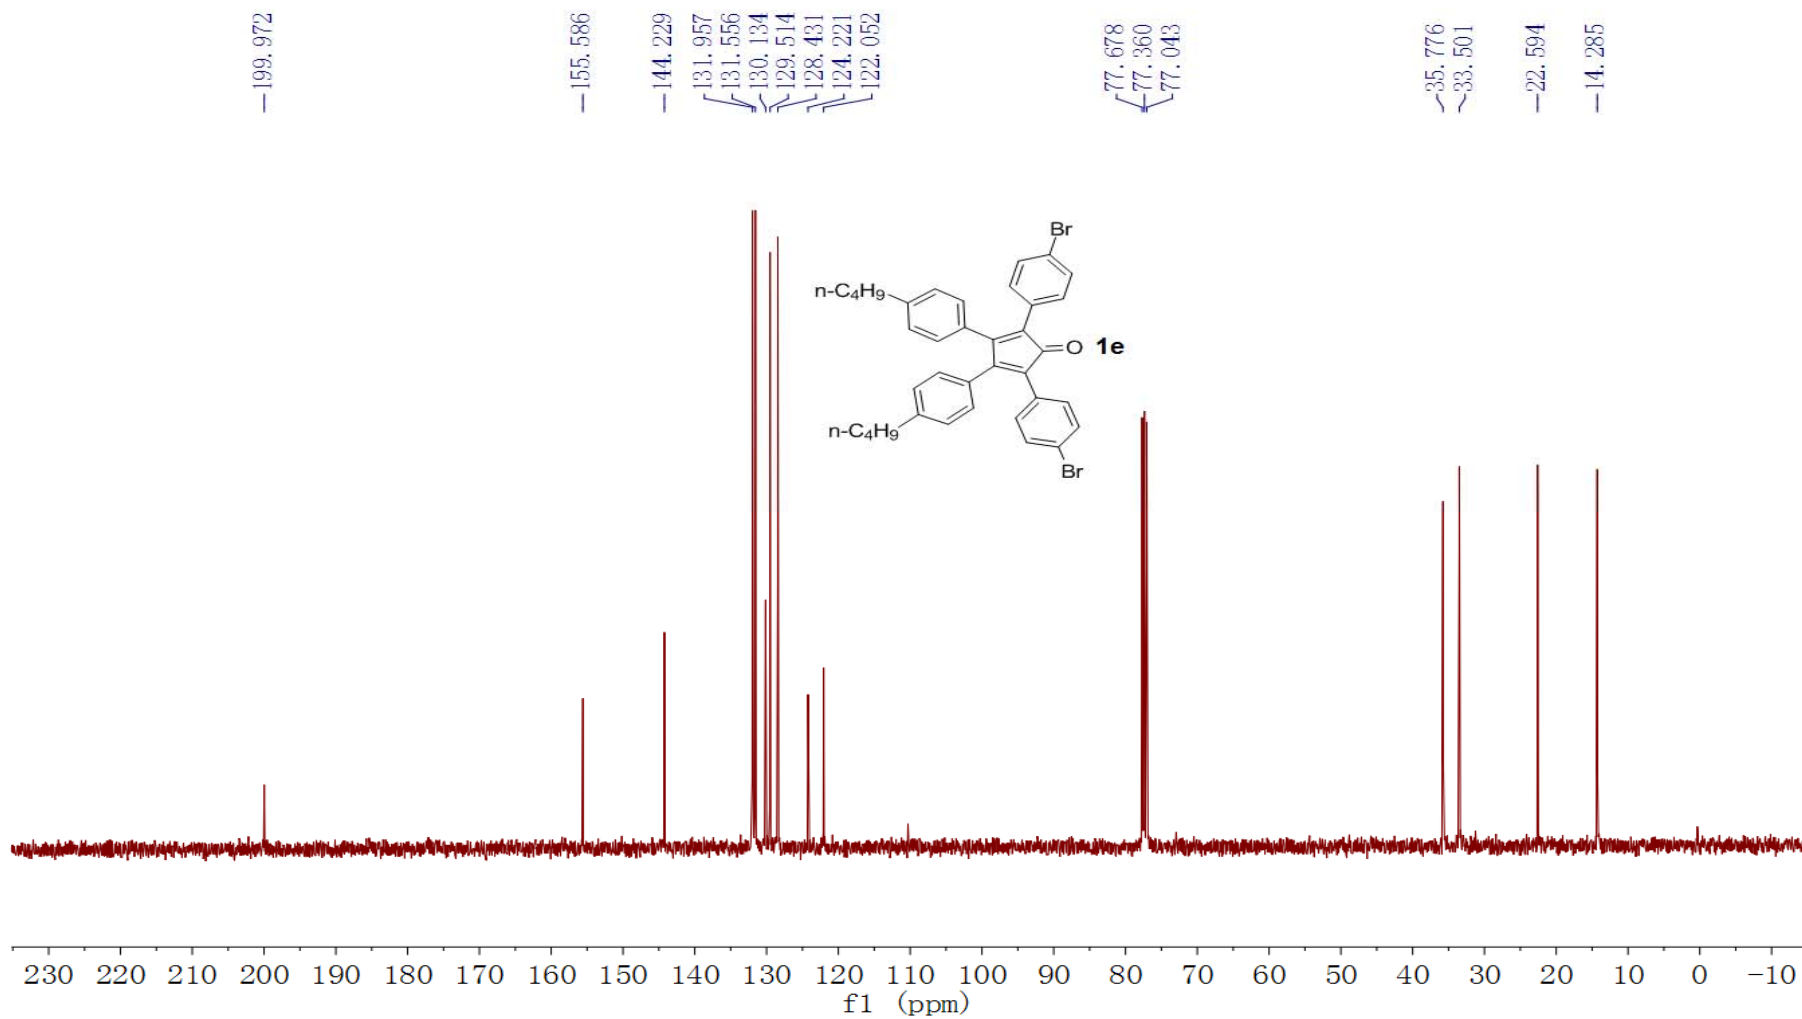

**Figure S9** The  $^1\text{H}$  NMR spectra of **1f**.

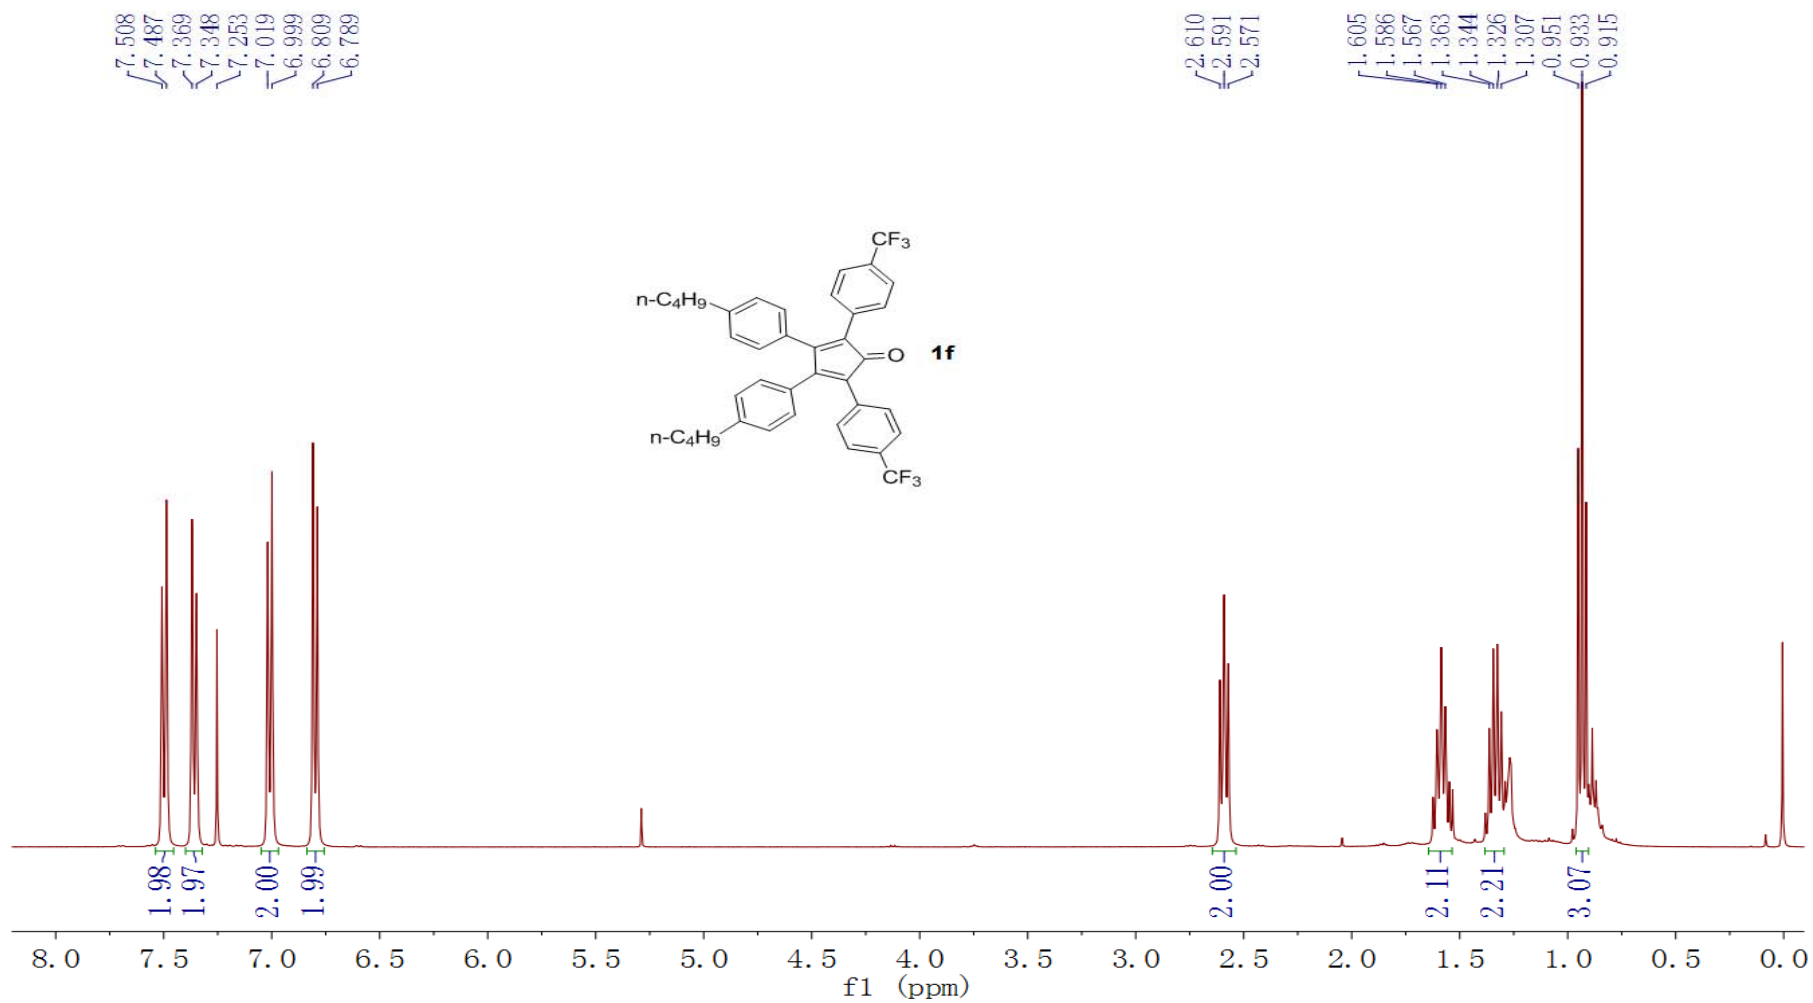

**Figure S10** The  $^{13}\text{C}$  NMR spectra of **1f**.

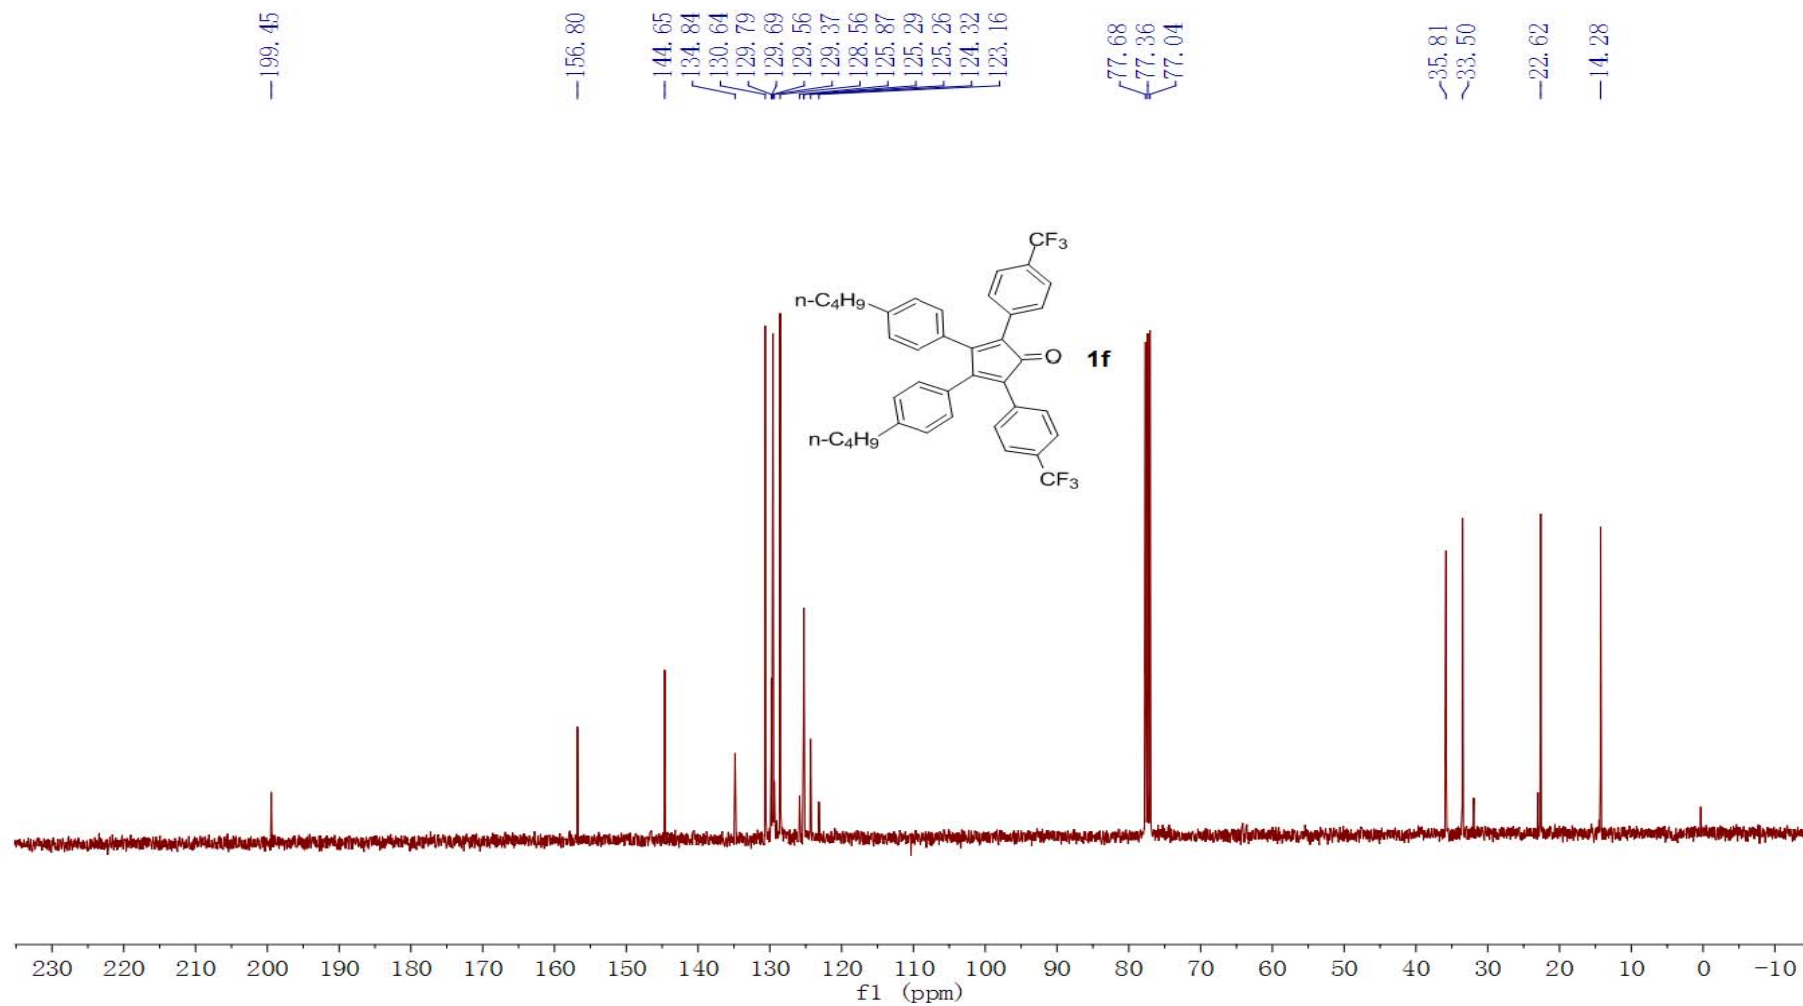



**Figure S11** The  $^1\text{H}$  NMR spectra of **1g**.

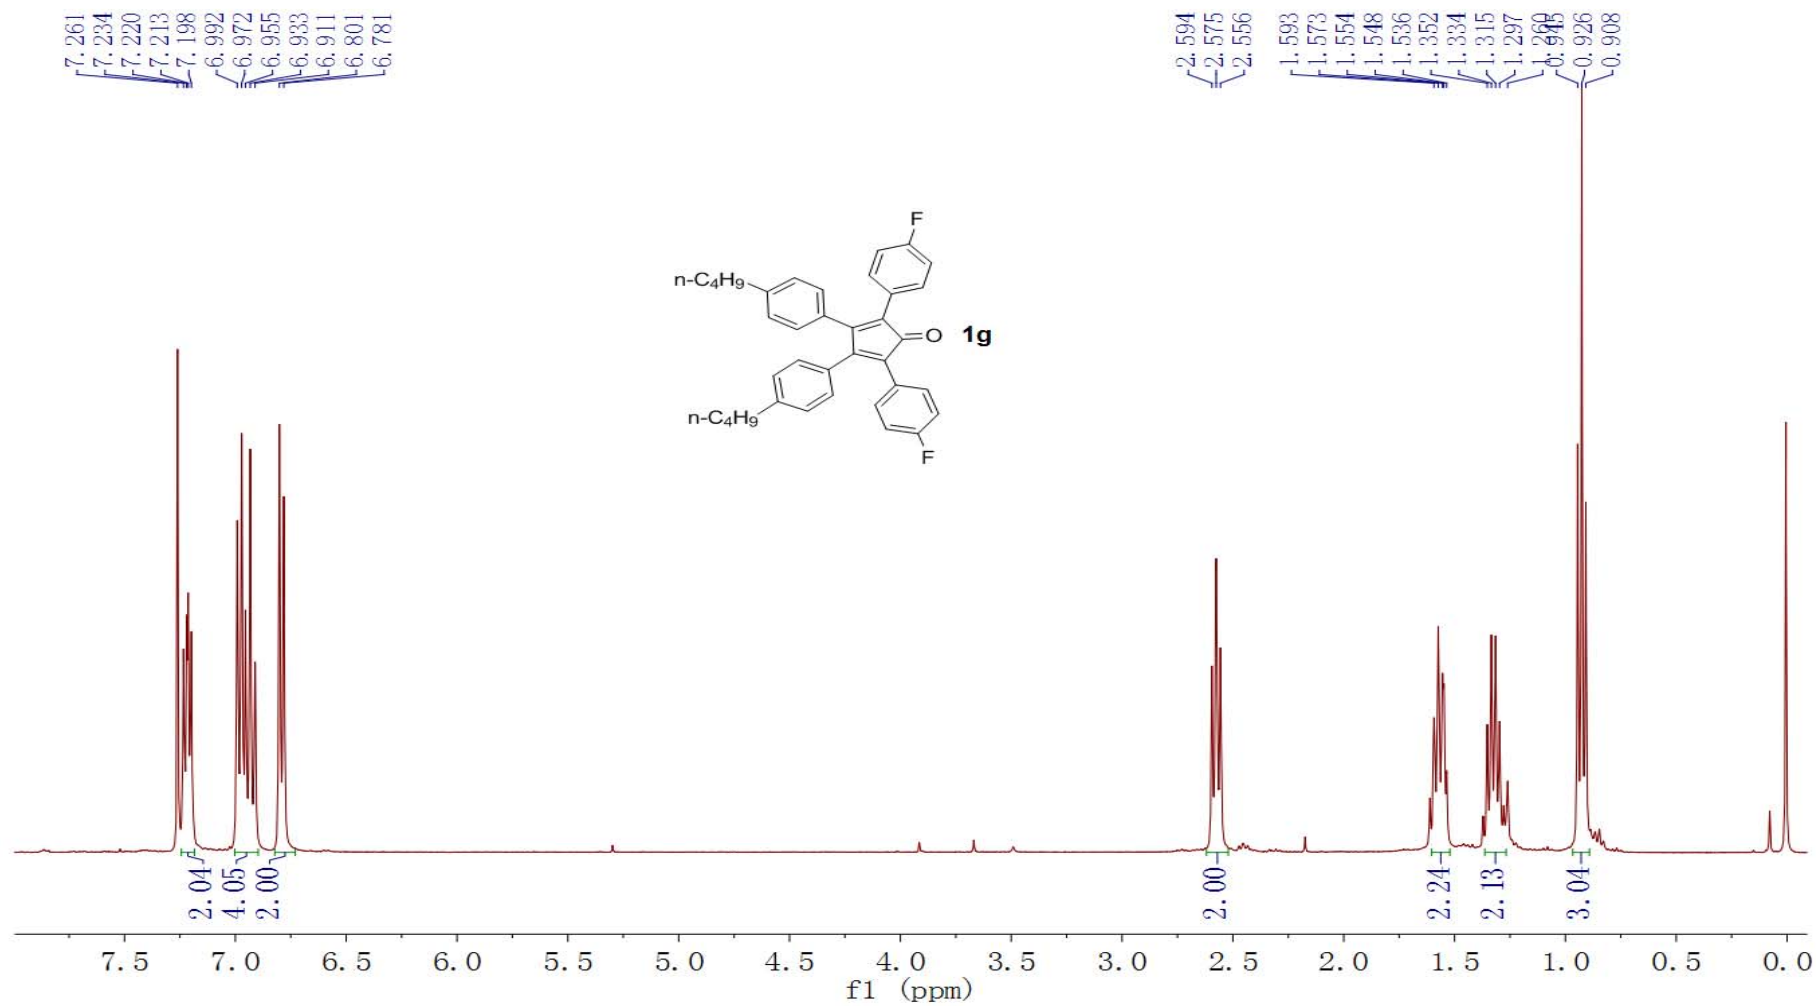

**Figure S12** The  $^{13}\text{C}$  NMR spectra of **1g**.

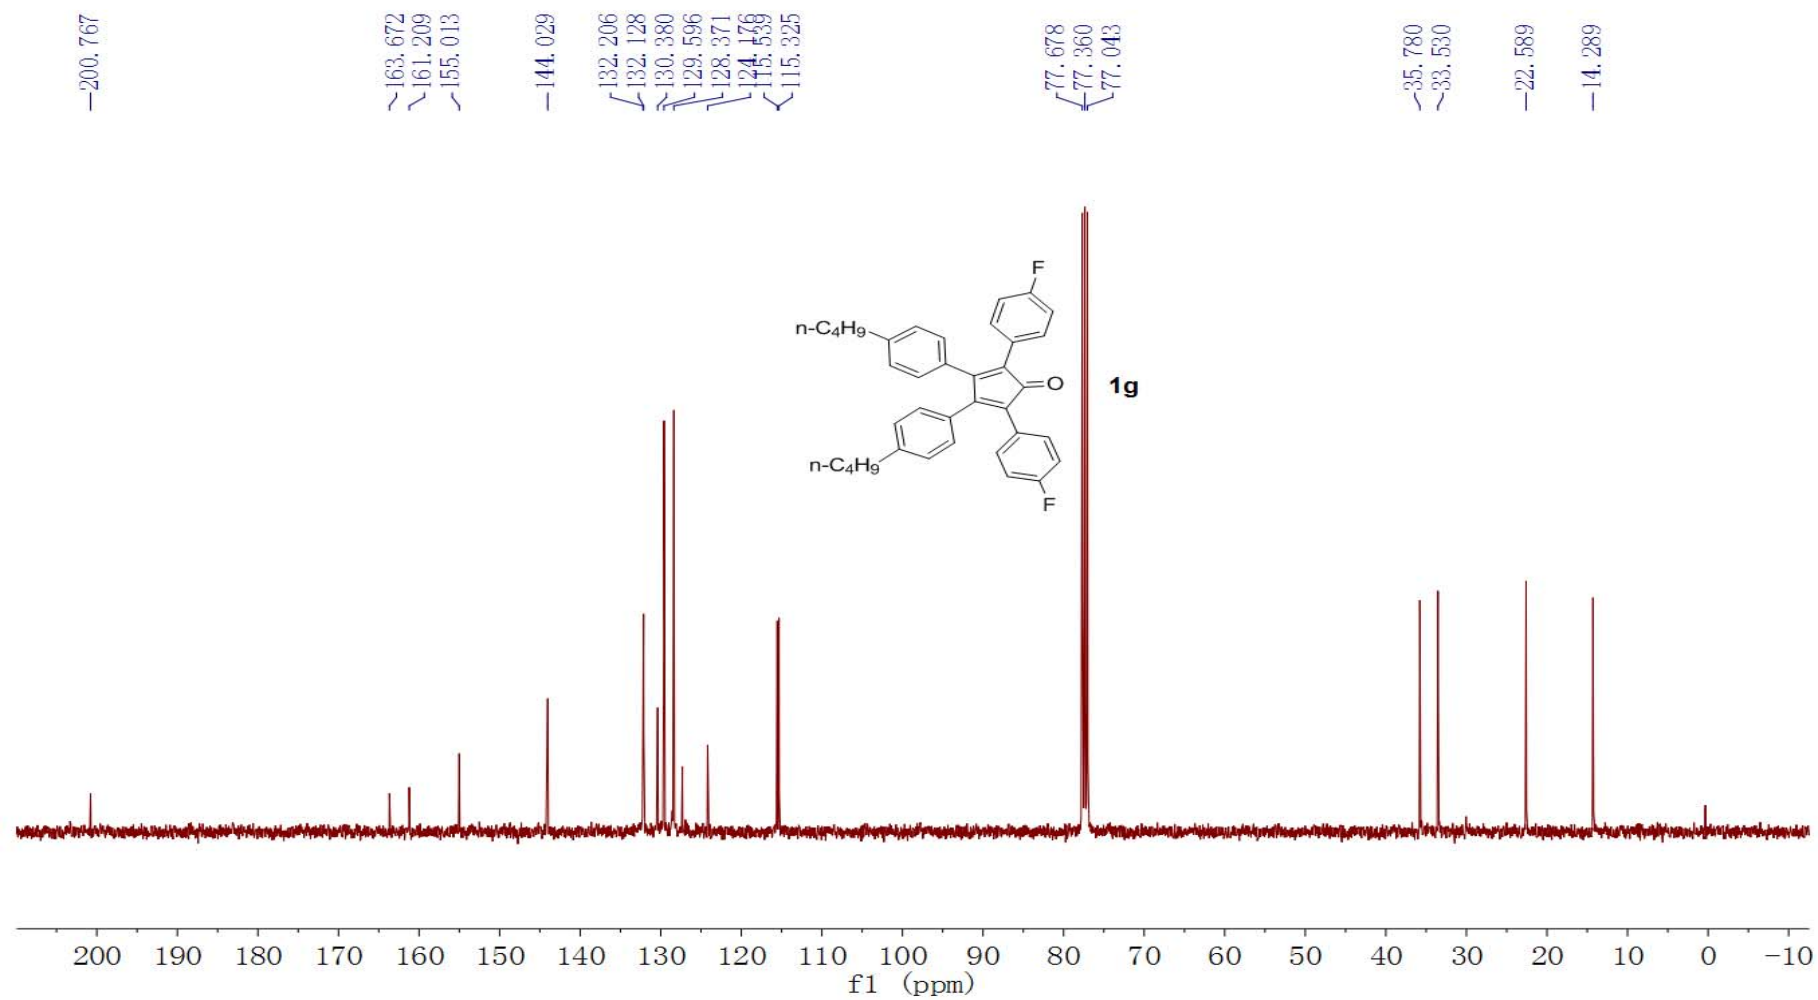

**Figure S13** The  $^1\text{H}$  NMR spectra of **1h**.

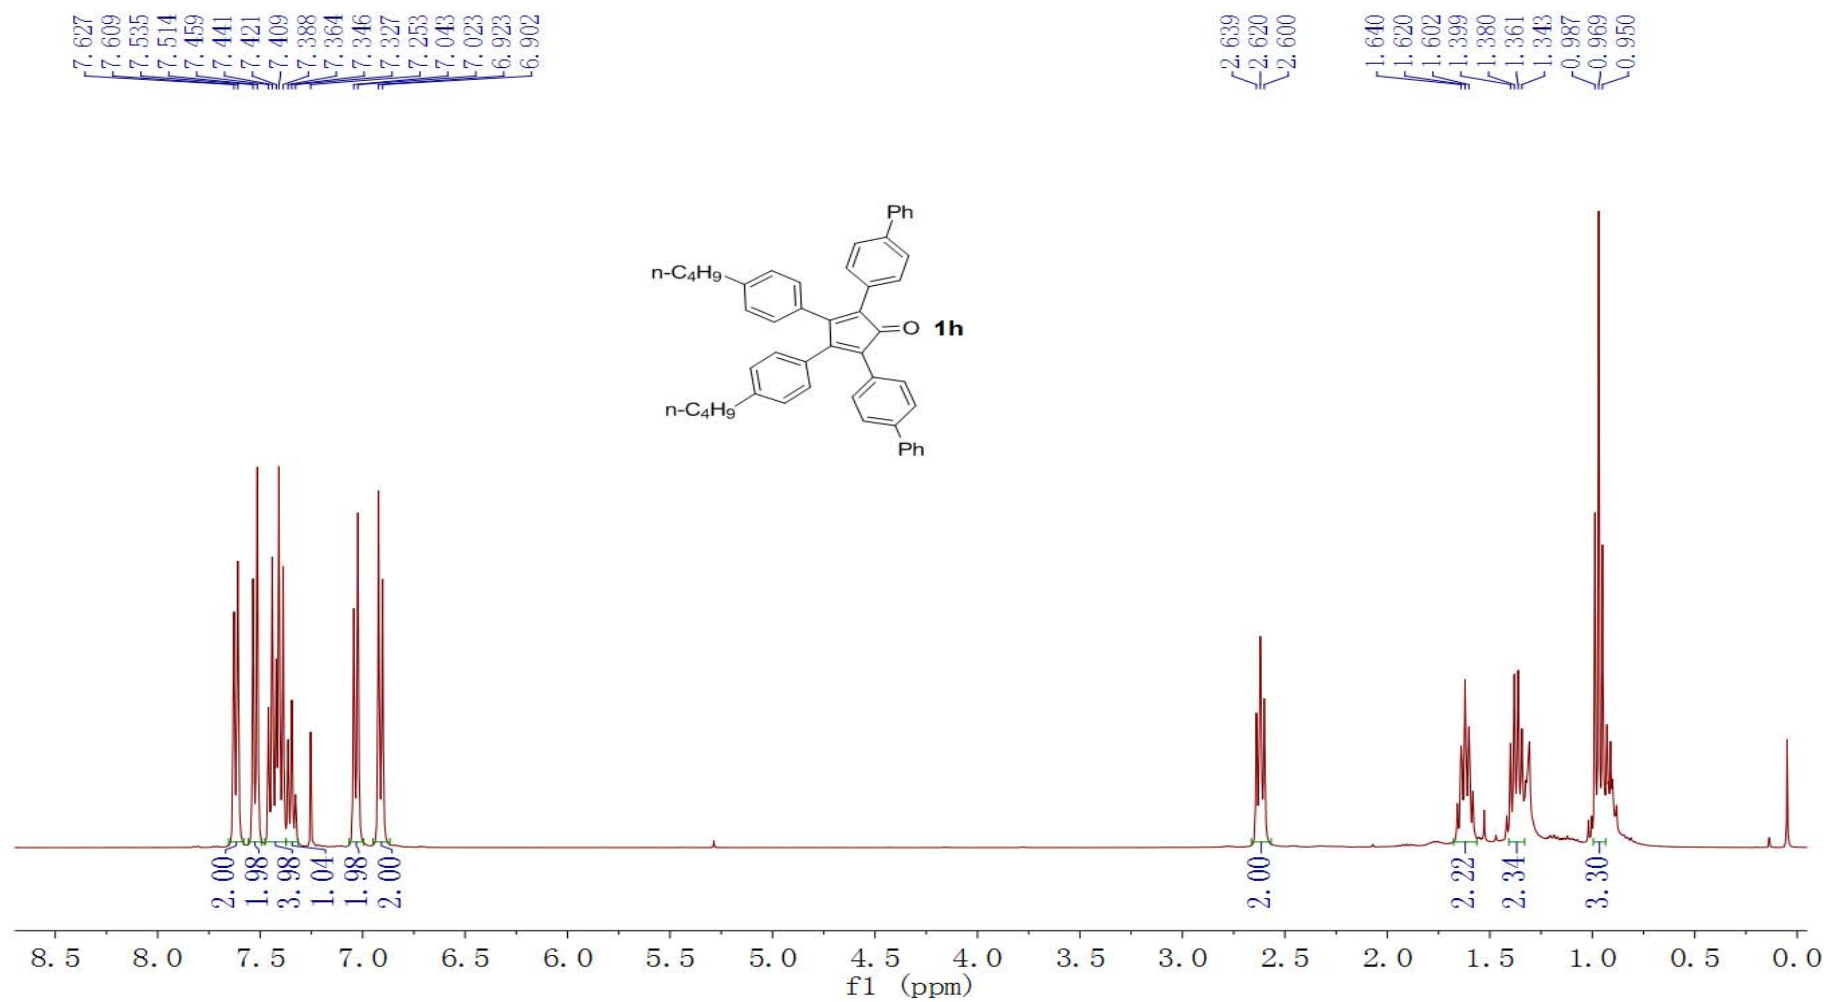

**Figure S14** The  $^{13}\text{C}$  NMR spectra of **1h**.

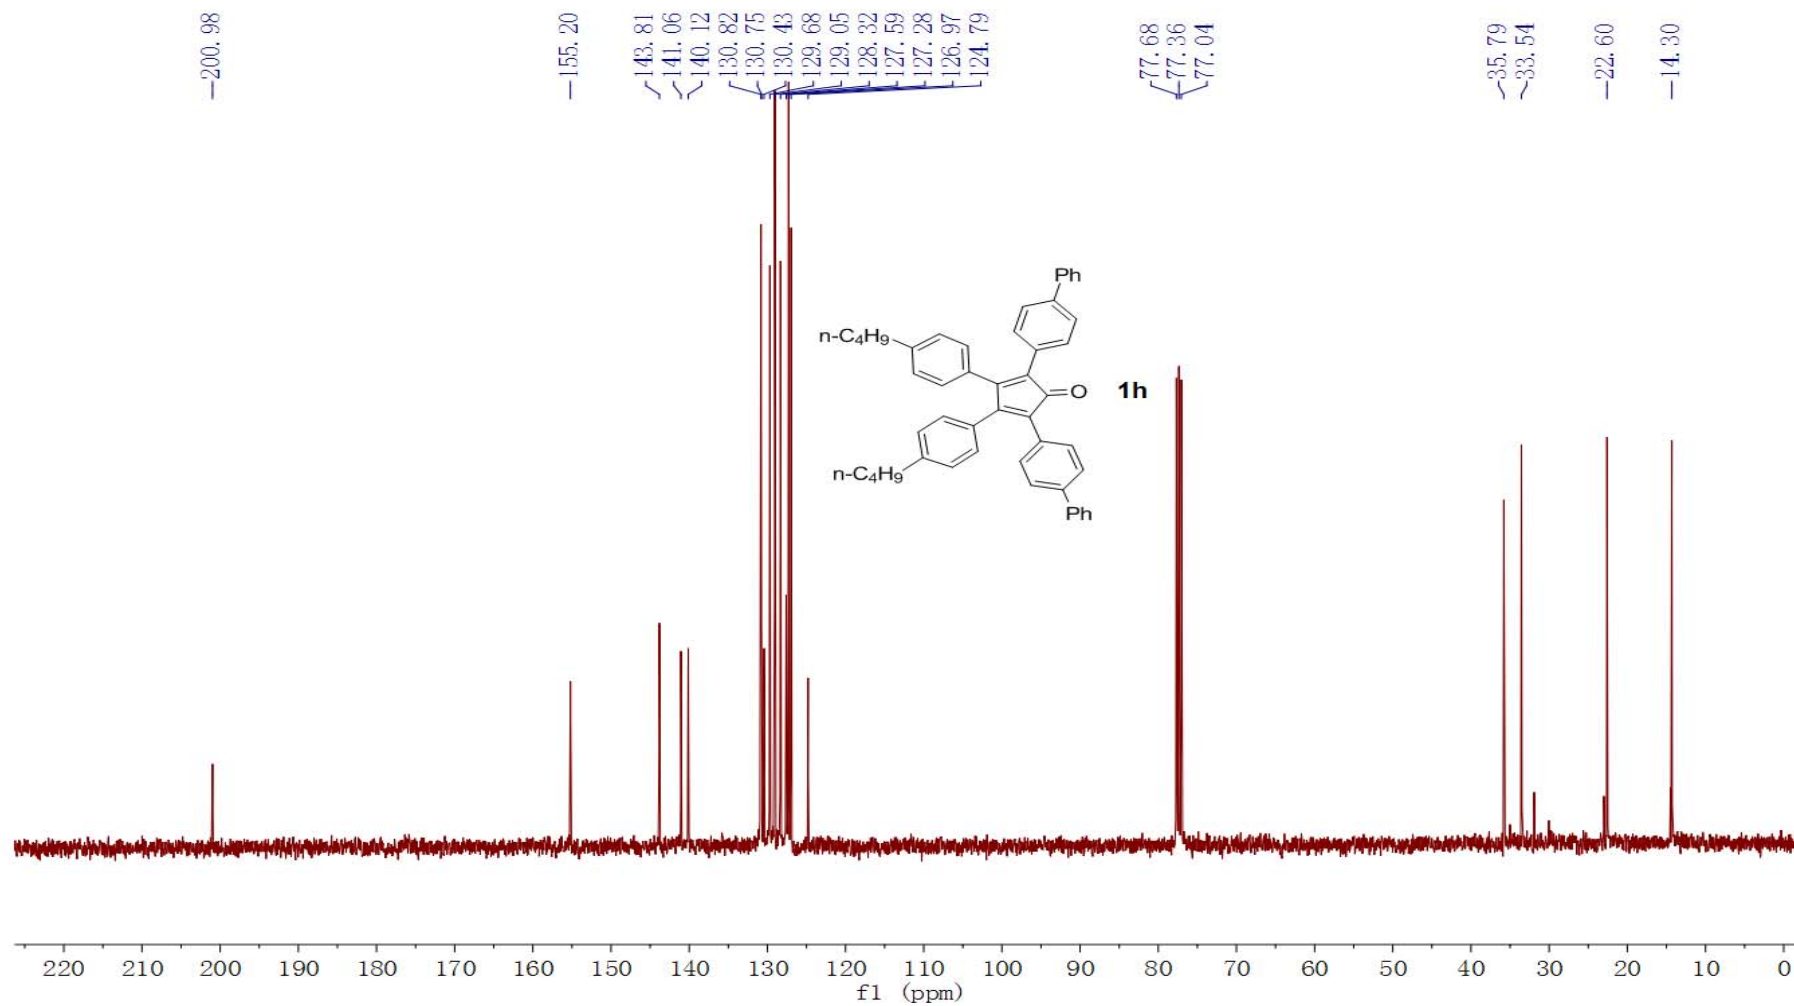

**Figure S15** The  $^1\text{H}$  NMR spectra of **1i**.

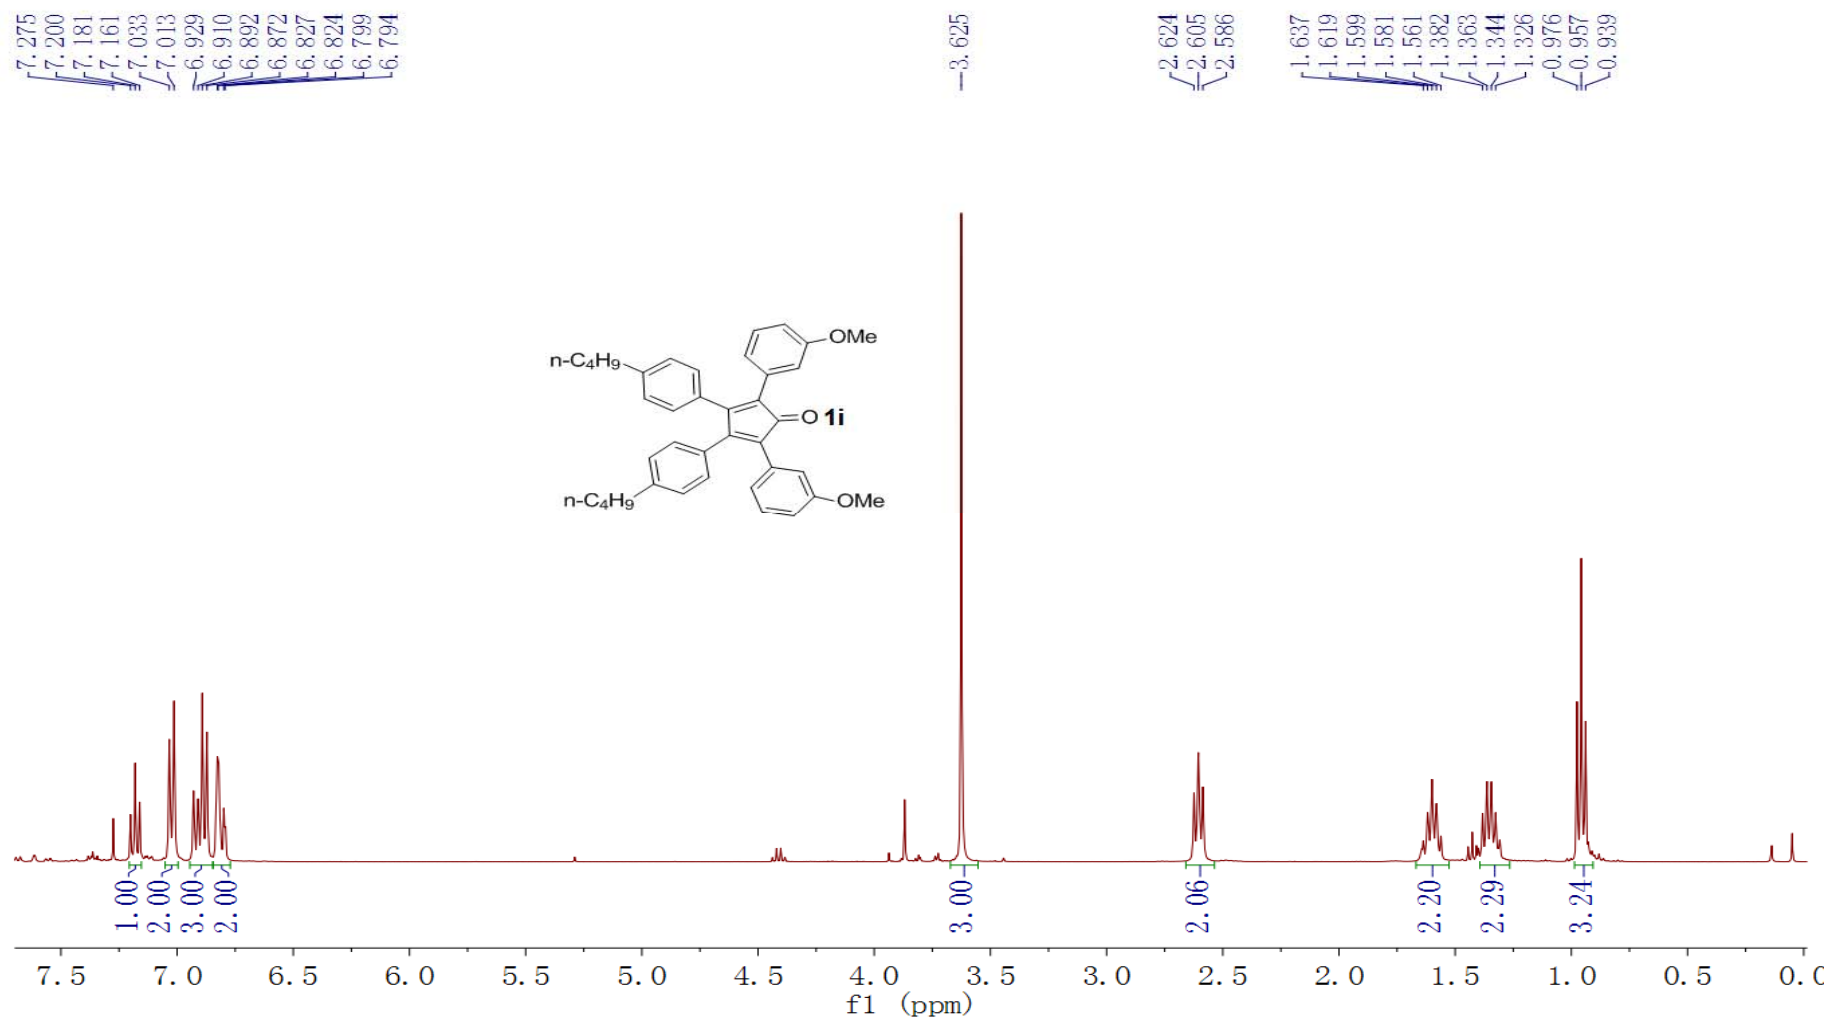

**Figure S16** The  $^{13}\text{C}$  NMR spectra of **1i**.

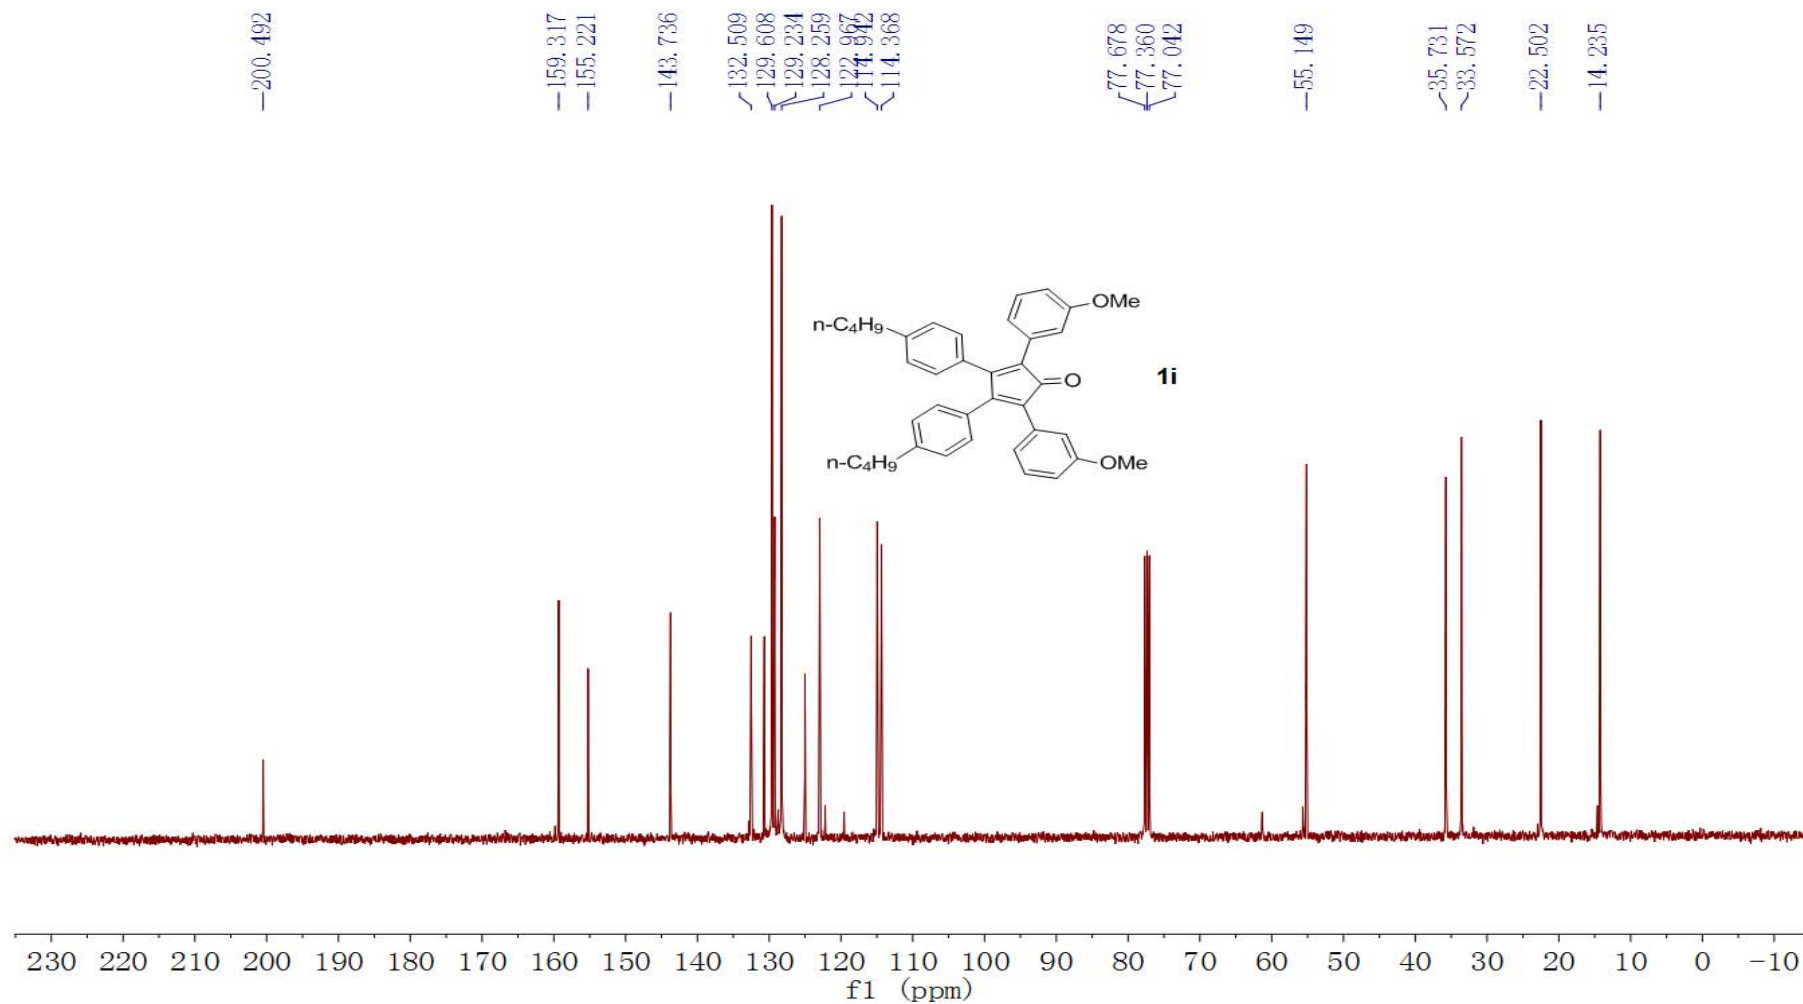

**Figure S17** The  $^1\text{H}$  NMR spectra of **1j**.

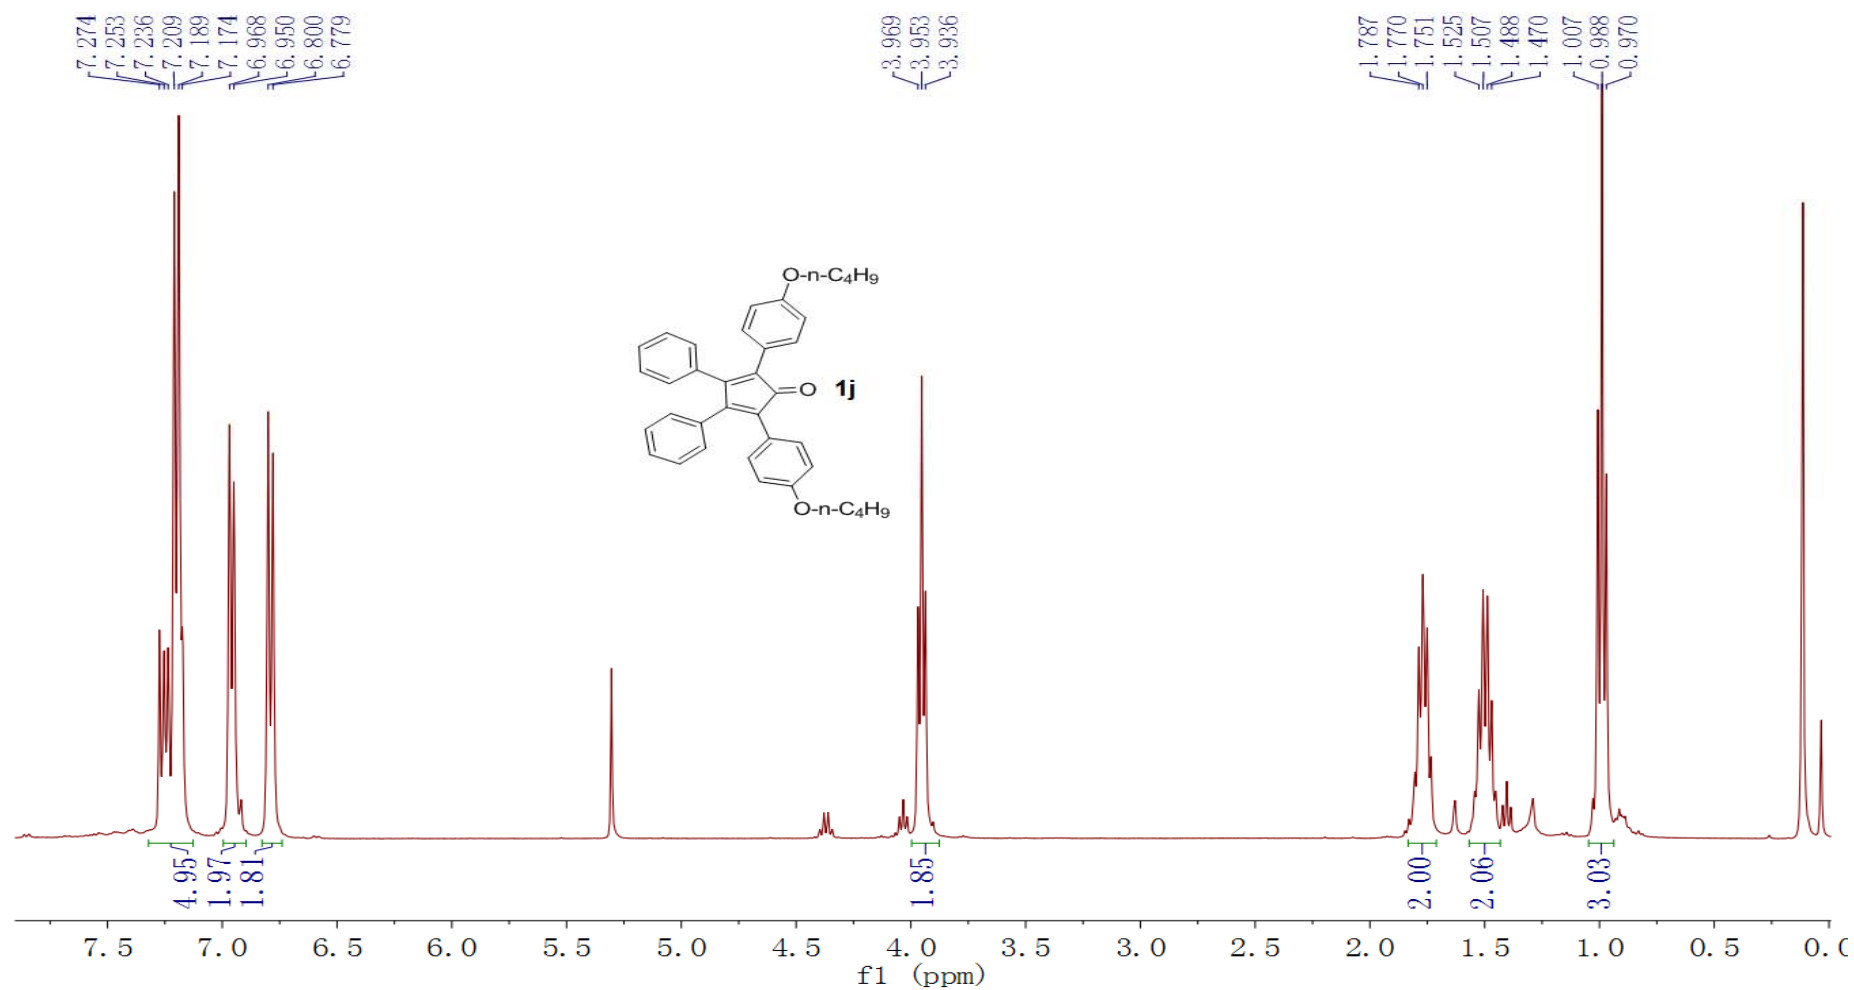

**Figure S18** The  $^{13}\text{C}$  NMR spectra of **1j**.

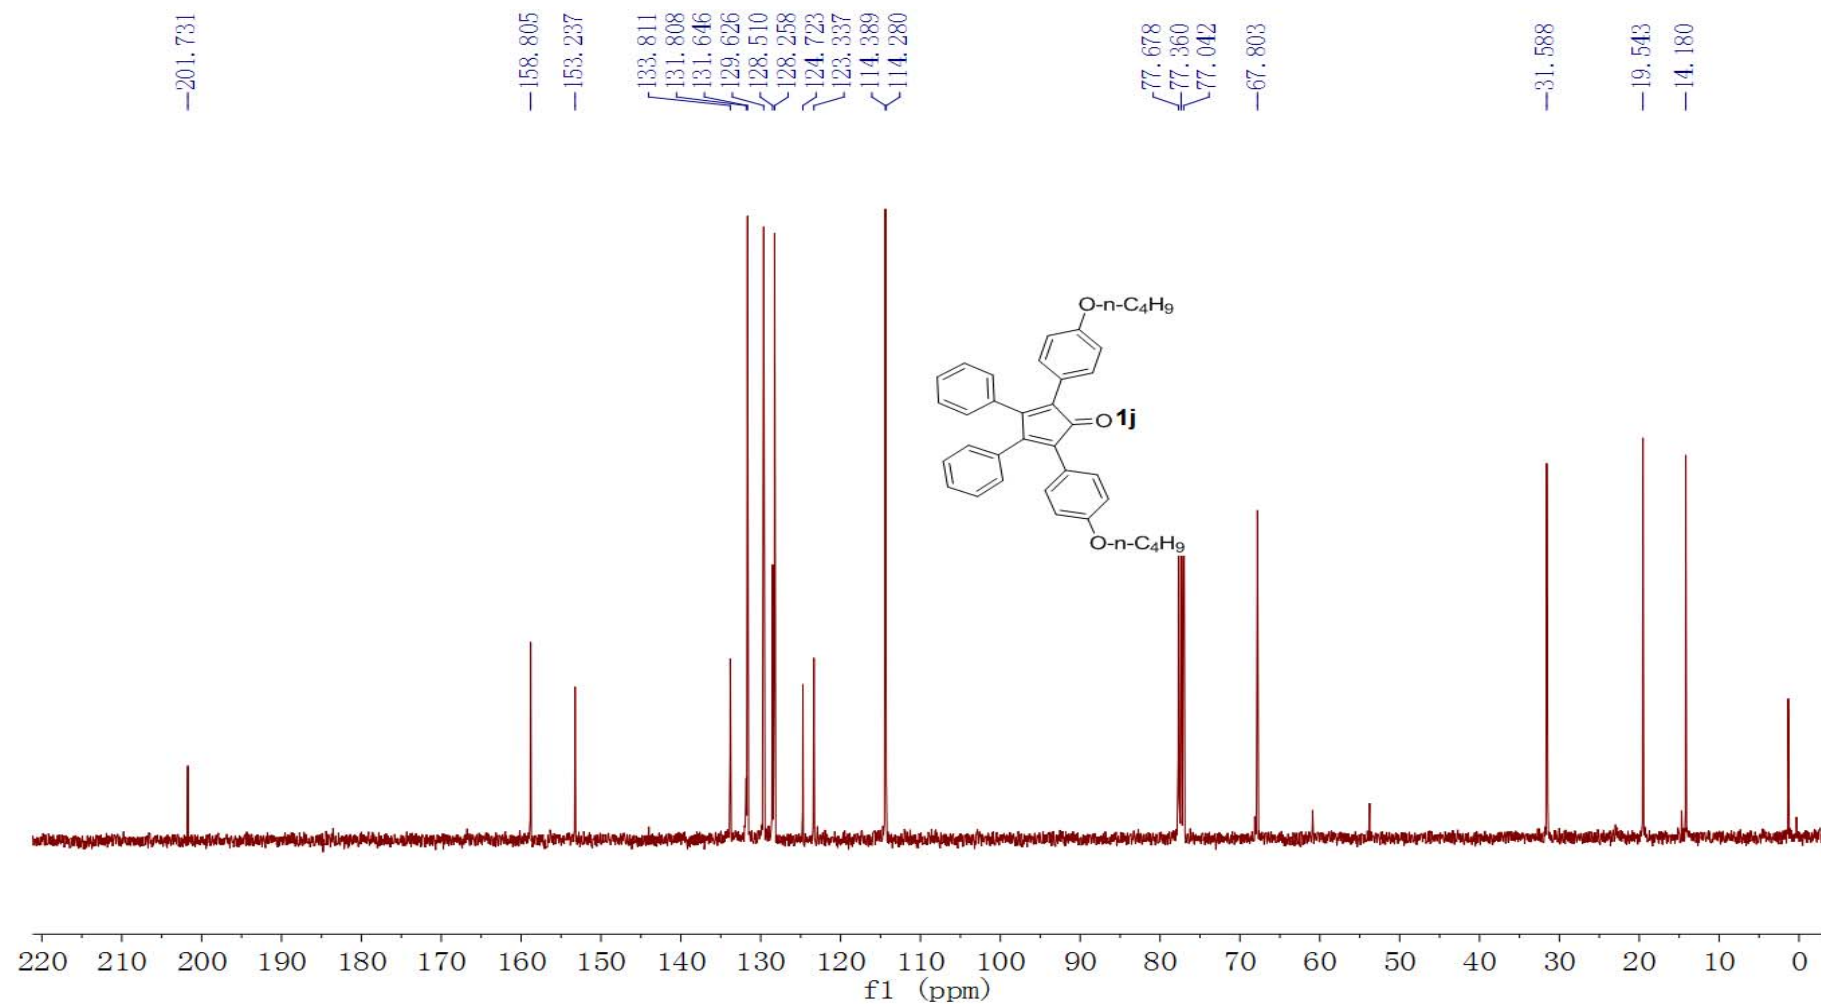



**Figure S19** The <sup>1</sup>H NMR spectra of **1k**.

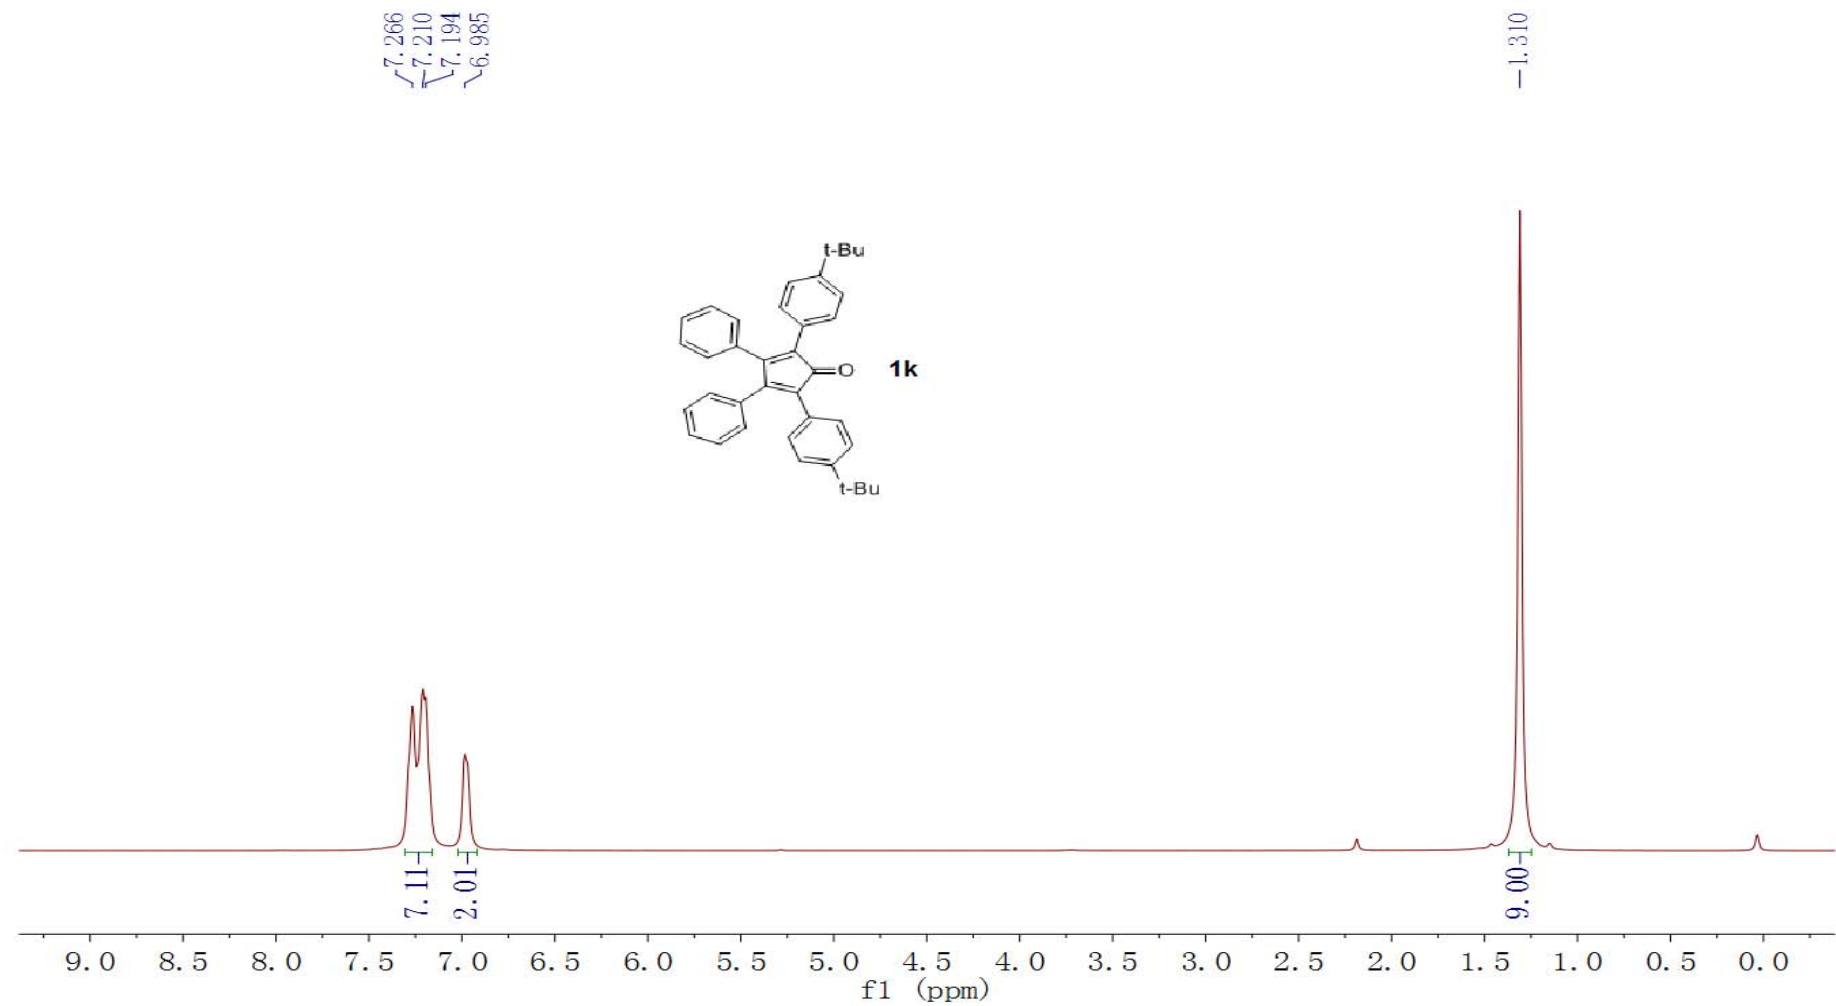

**Figure S20** The  $^{13}\text{C}$  NMR spectra of **1k**.

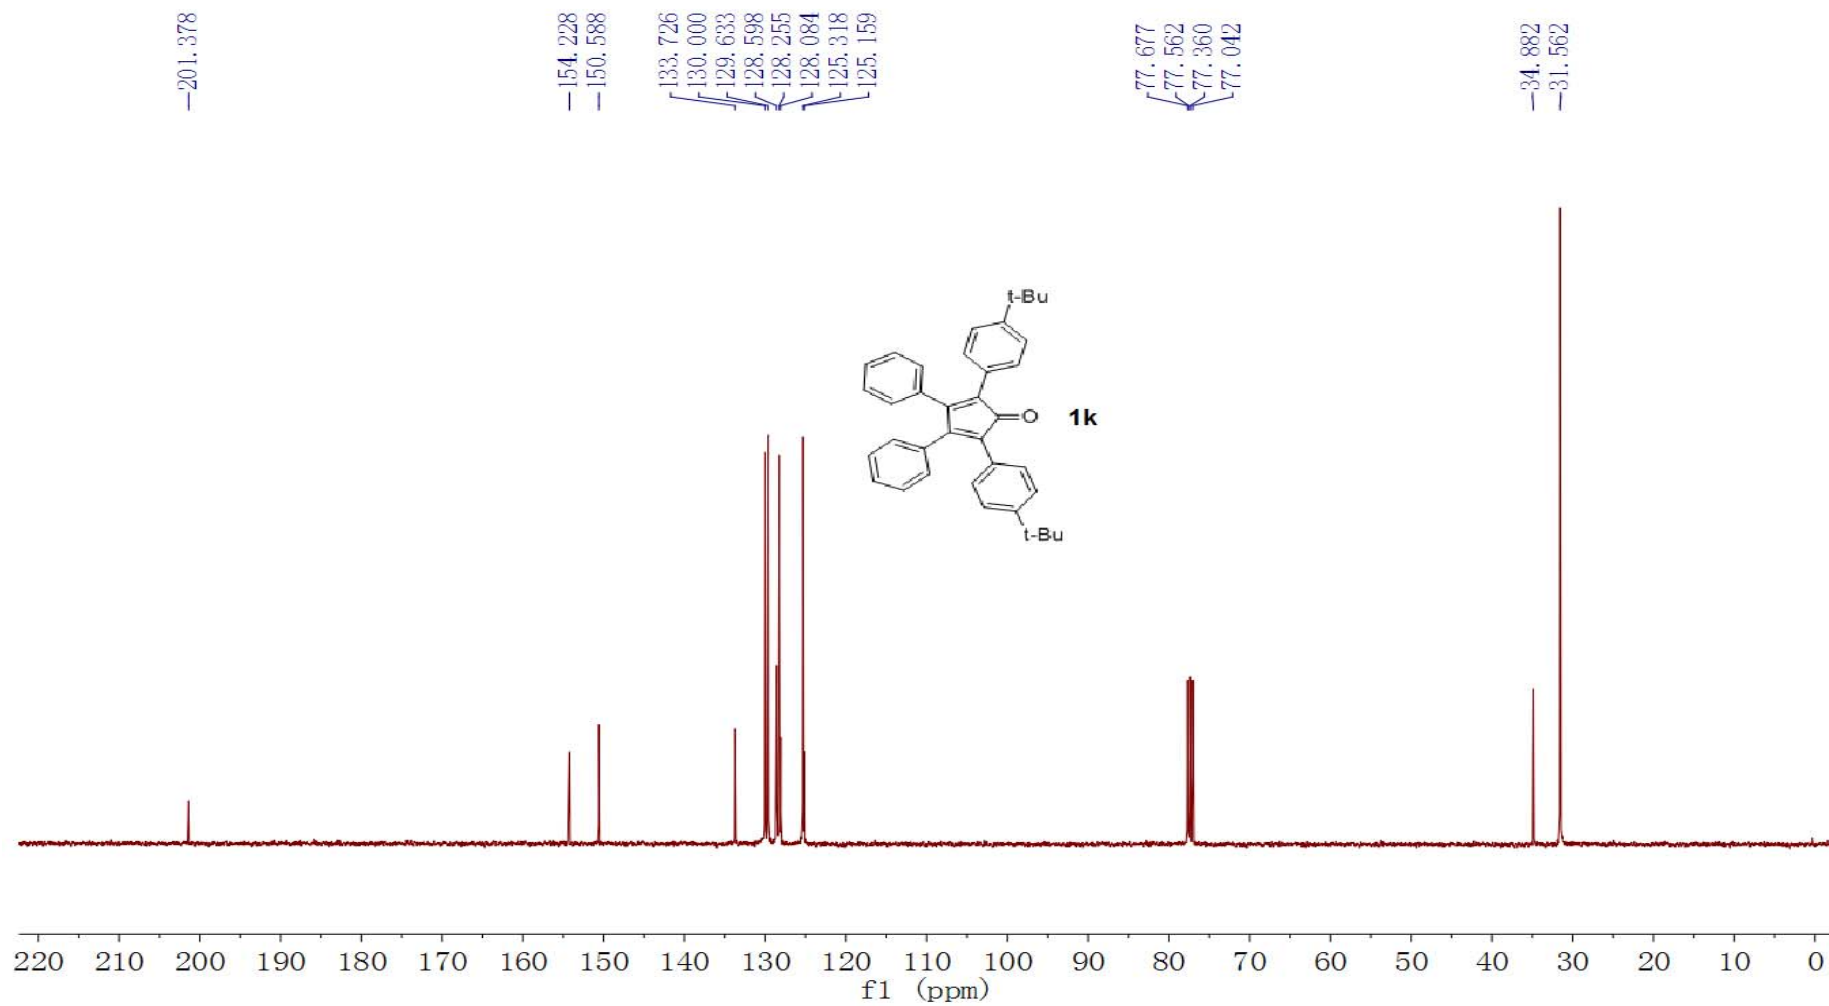

**Figure S21** The  $^1\text{H}$  NMR spectra of **11**.

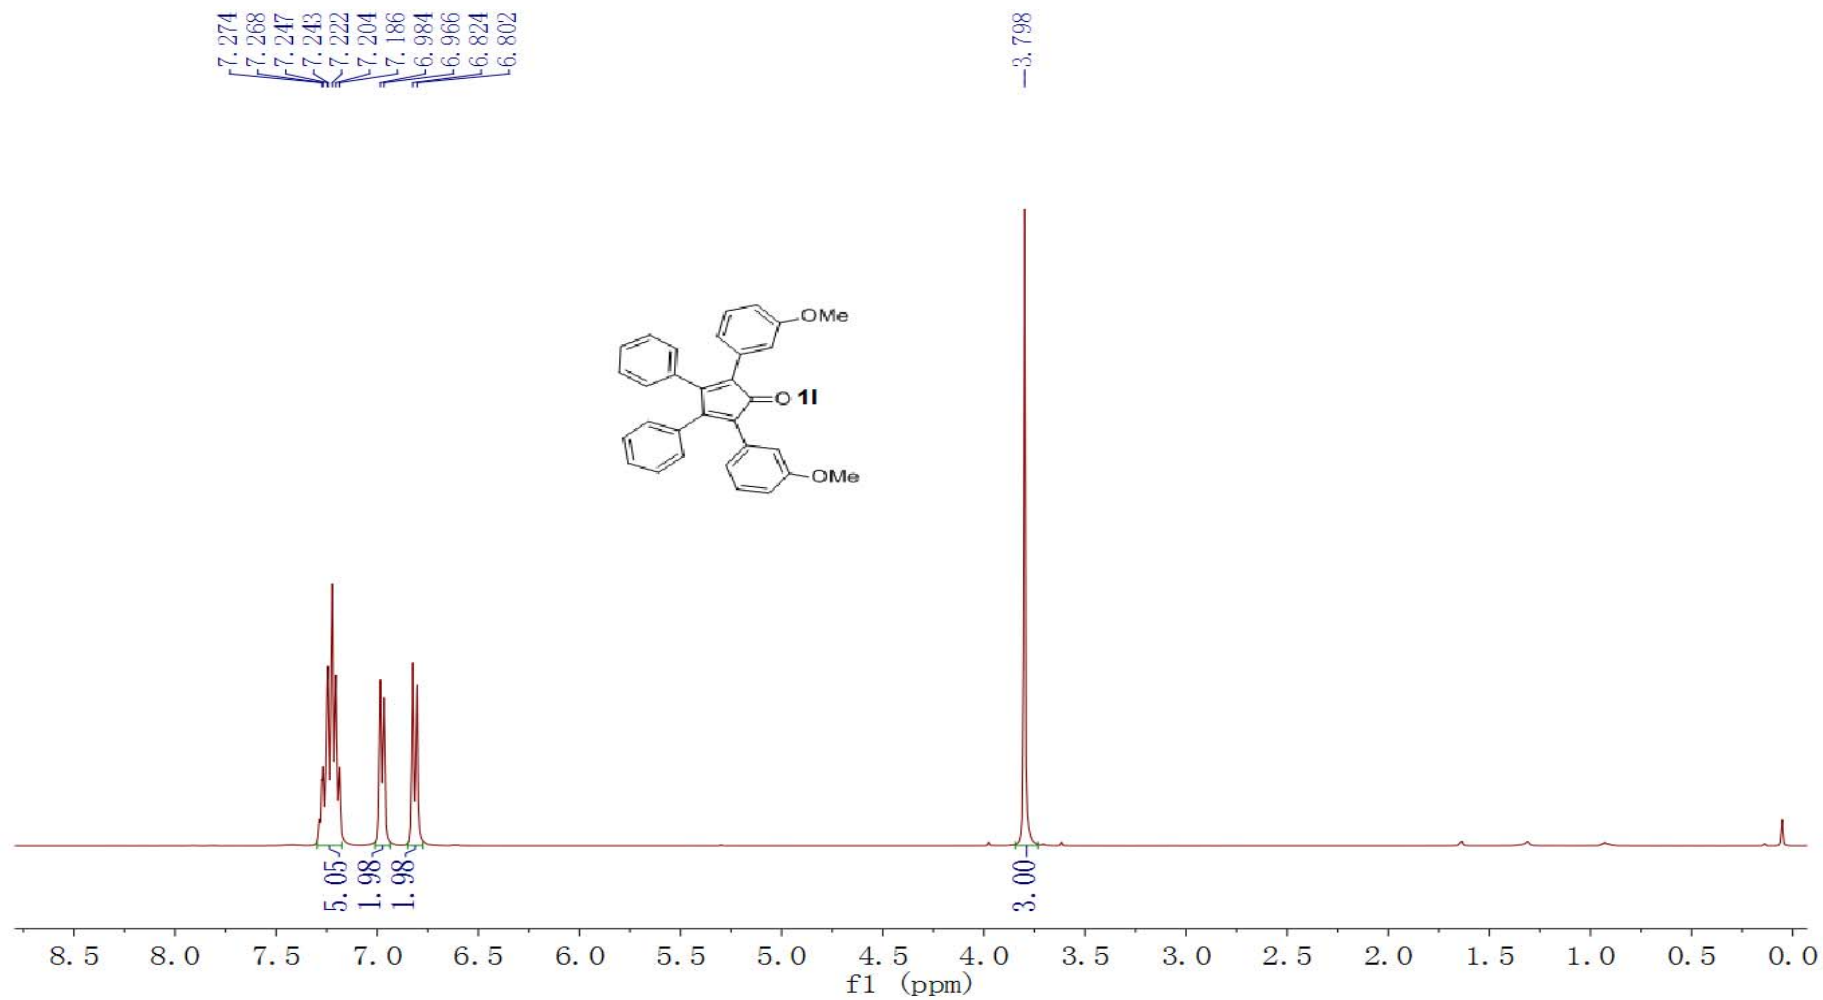

**Figure S22** The  $^{13}\text{C}$  NMR spectra of **11**.

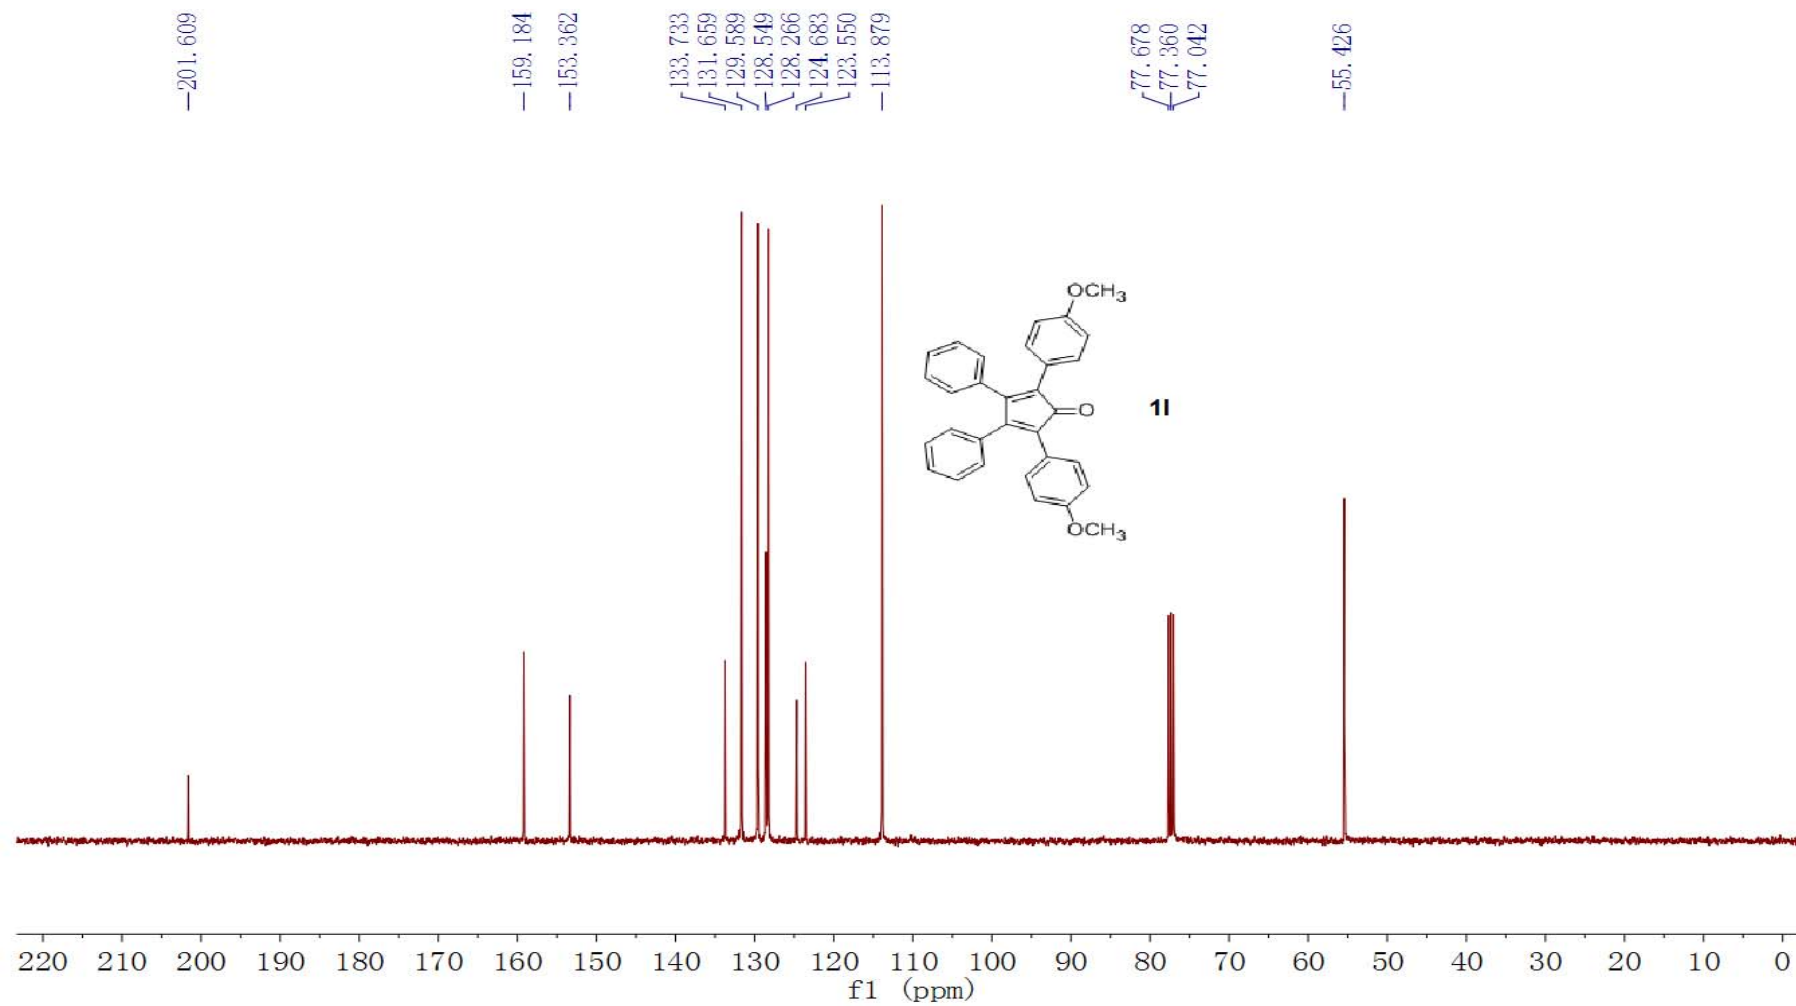

**Figure S23** The  $^1\text{H}$  NMR spectra of **1m**.

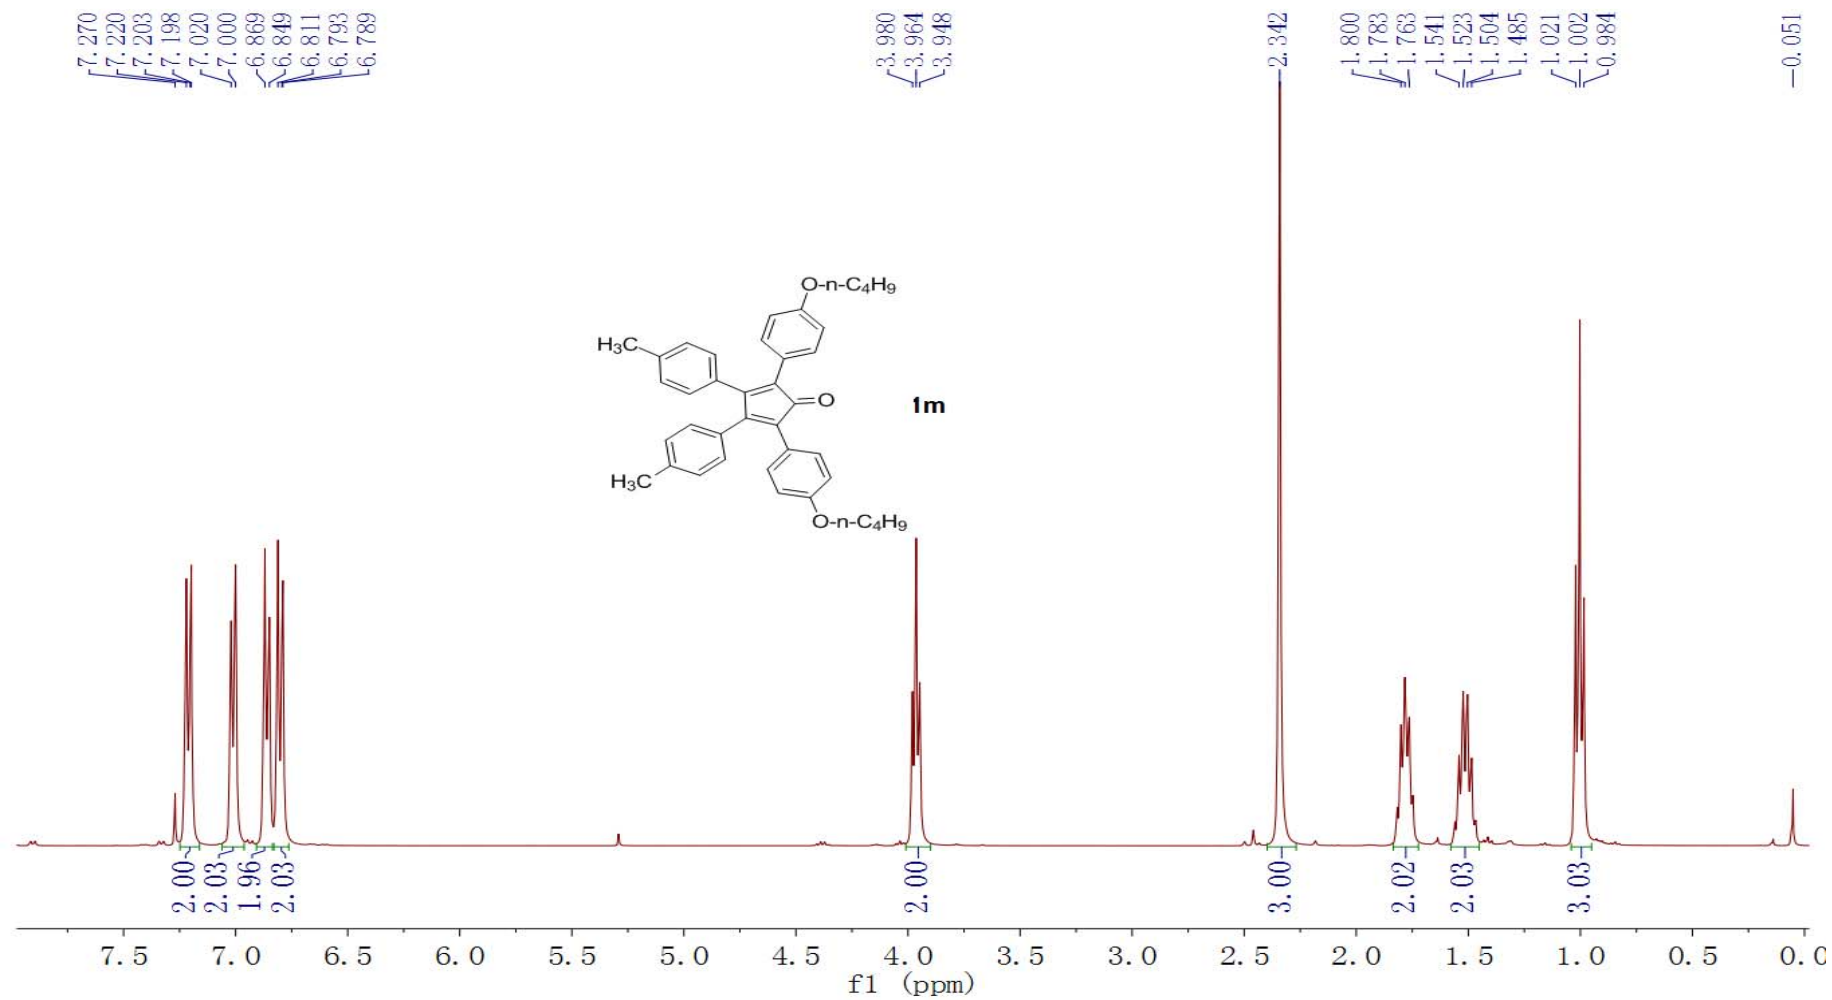

**Figure S24** The  $^{13}\text{C}$  NMR spectra of **1m**.

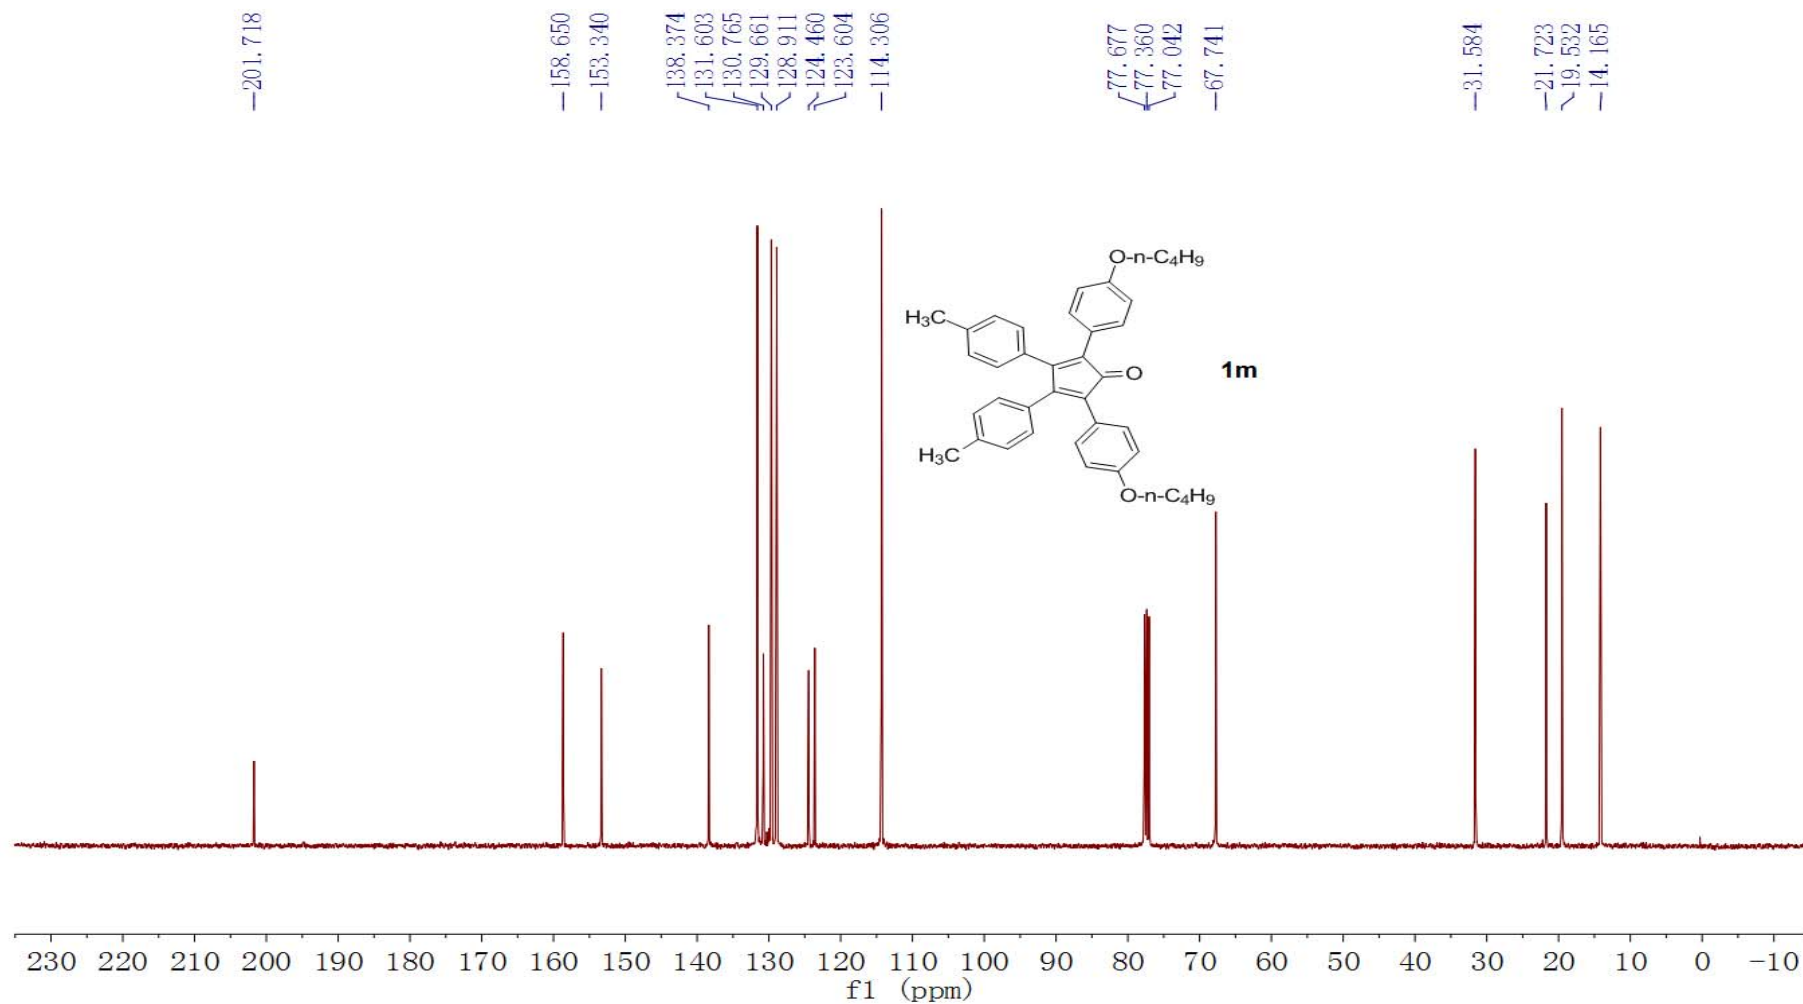

**Figure S25** The  $^1\text{H}$  NMR spectra of **1n**.

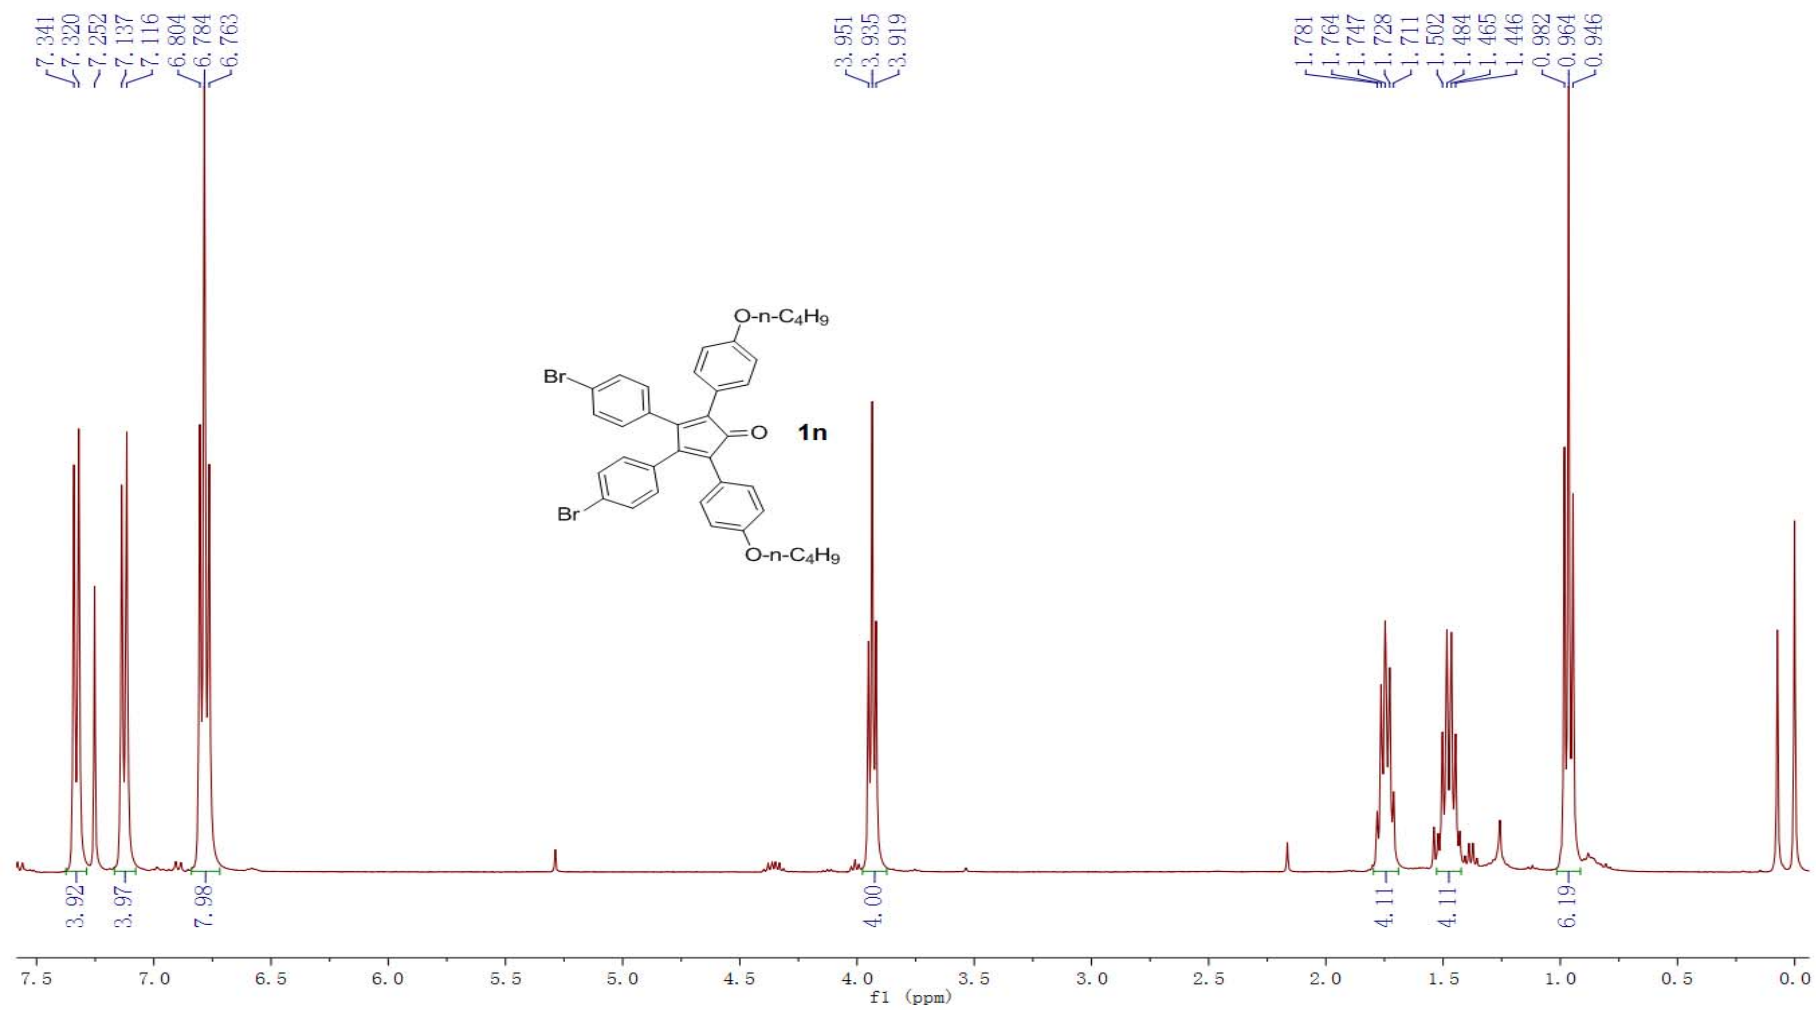

**Figure S26** The  $^{13}\text{C}$  NMR spectra of **1n**.

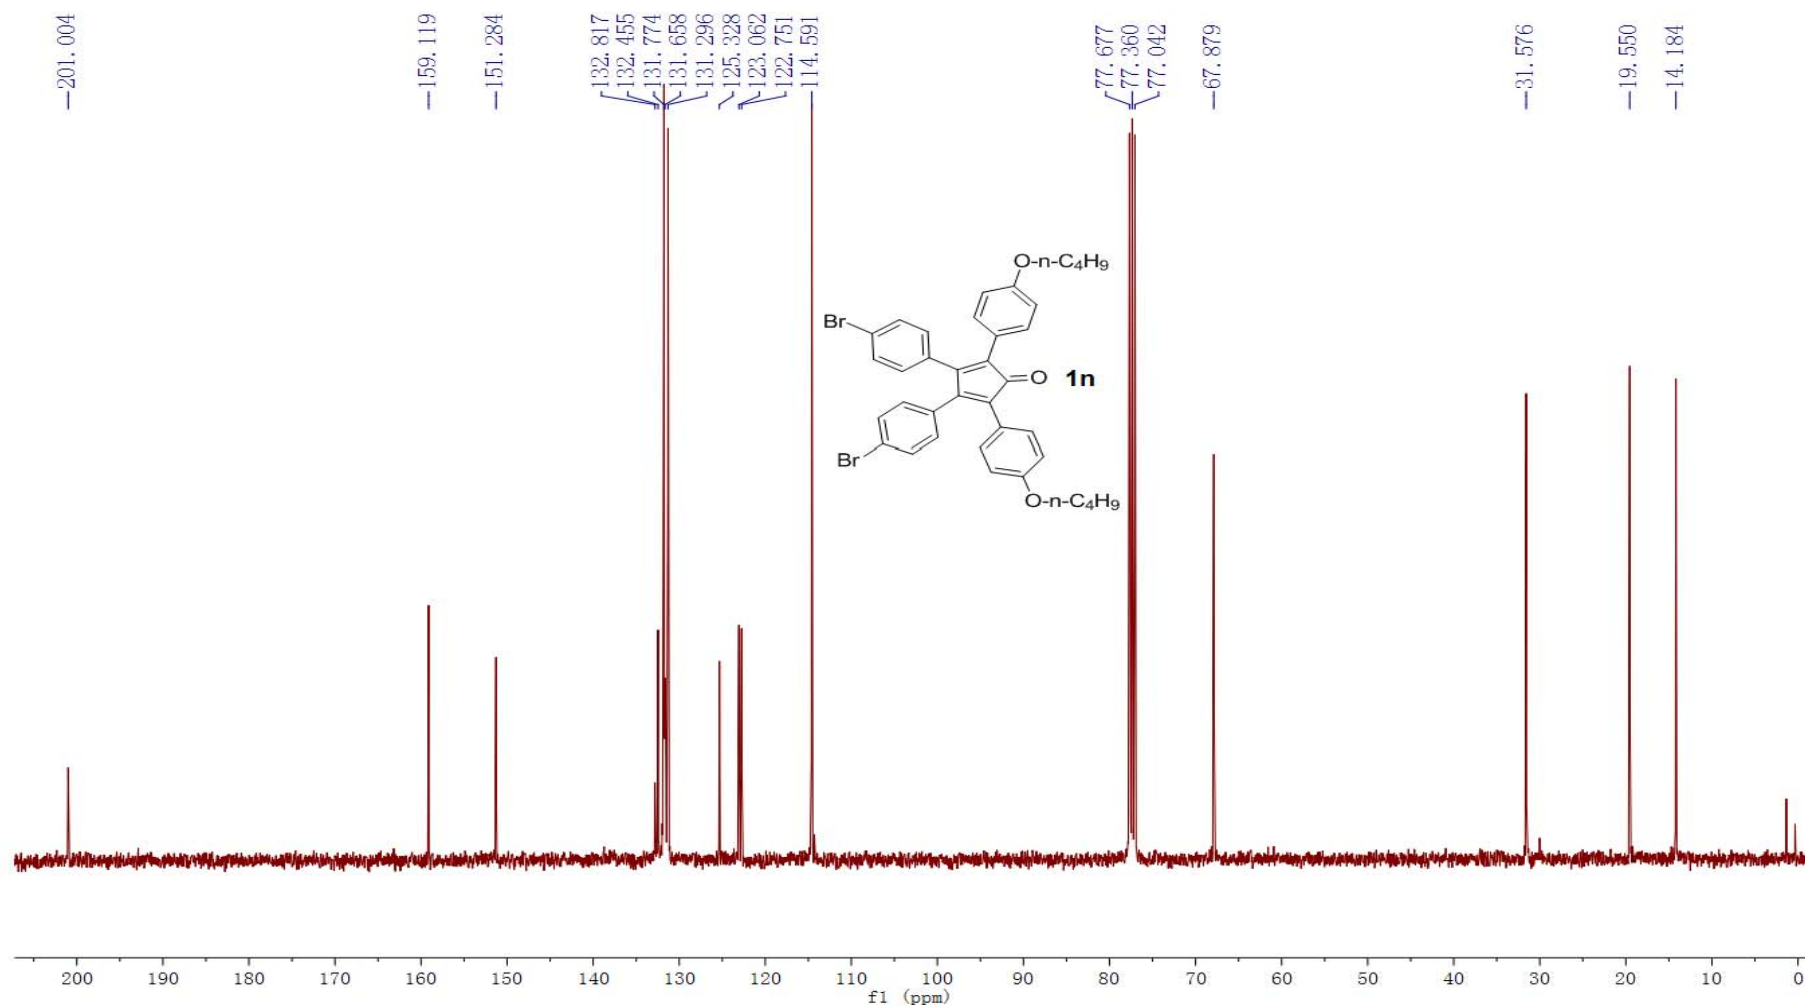



**2. Table S1.** The optimization of reaction conditions for the formation of **2b**

| Entry | Ammonium salts      | <b>1b</b> /NH <sub>4</sub> <sup>+</sup> (mol ratio) | Solvent/Temp             | Time/h | Yield % <sup>a</sup> |
|-------|---------------------|-----------------------------------------------------|--------------------------|--------|----------------------|
| 1     | NH <sub>4</sub> Cl  | 1/8                                                 | AcOH/ reflux             | 24     | 21                   |
| 2     |                     | 1/12                                                | AcOH/ reflux             | 24     | 34                   |
| 3     |                     | 1/16                                                | AcOH/ reflux             | 24     | 53                   |
| 4     |                     | 1/20                                                | AcOH/ reflux             | 24     | 57                   |
| 5     |                     | 1/24                                                | AcOH/ reflux             | 24     | 62                   |
| 6     |                     | 1/30                                                | AcOH/ reflux             | 24     | 64                   |
| 7     | HCOONH <sub>4</sub> | 1/30                                                | AcOH/ reflux             | 24     | 0                    |
| 8     | NH <sub>4</sub> OAc | 1/8                                                 | AcOH/ reflux             | 24     | 25                   |
| 9     |                     | 1/12                                                | AcOH/ reflux             | 24     | 47                   |
| 10    |                     | 1/16                                                | AcOH/ reflux             | 24     | 63                   |
| 11    |                     | 1/20                                                | AcOH/ reflux             | 24     | 73                   |
| 12    |                     | 1/24                                                | AcOH/ reflux             | 24     | 73                   |
| 13    |                     | 1/30                                                | AcOH/ reflux             | 24     | 72                   |
| 14    |                     | 1/30                                                | AcOH/ 50 °C              | 24     | 7                    |
| 15    |                     | 1/20                                                | Ac <sub>2</sub> O/reflux | 24     | 11                   |
| 16    |                     | 1/20                                                | Toluene/reflux           | 24     | 55                   |
| 17    |                     | 1/20                                                | AcOH/ reflux             | 4      | 15                   |
| 18    |                     | 1/20                                                | AcOH/ reflux             | 8      | 37                   |
| 19    |                     | 1/20                                                | AcOH/ reflux             | 12     | 53                   |
| 20    |                     | 1/20                                                | AcOH/ reflux             | 16     | 68                   |
| 21    |                     | 1/20                                                | AcOH/ reflux             | 20     | 73                   |

<sup>a</sup> Yield refers to isolated yield.

Optimal condition: **1b** (1 mmol), NH<sub>4</sub>OAc (20 mmol), and AcOH (2 ml) were mixed and refluxed for 20 hours.

3.  $^1\text{H}$  NMR and  $^{13}\text{C}$  NMR spectra of **2a-2m**

**Figure S27.**  $^1\text{H}$  NMR spectra of **2a**.

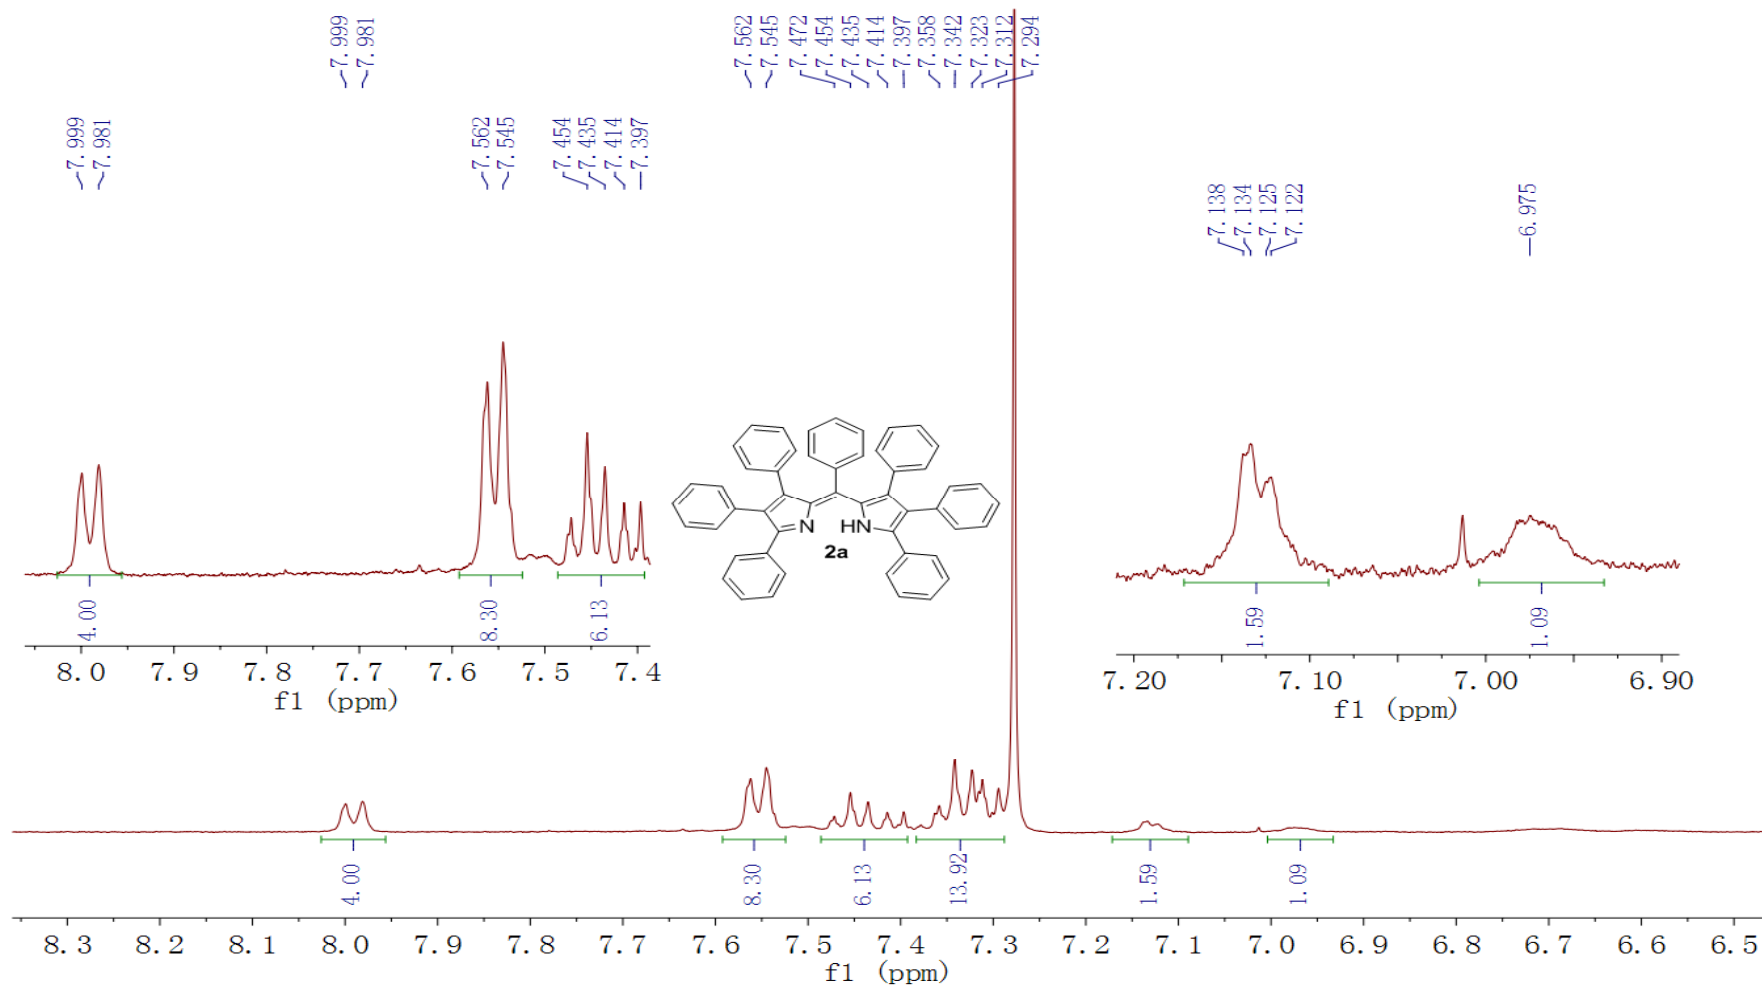

**Figure S28.** The  $^1\text{H}$  NMR spectra of **2b**.

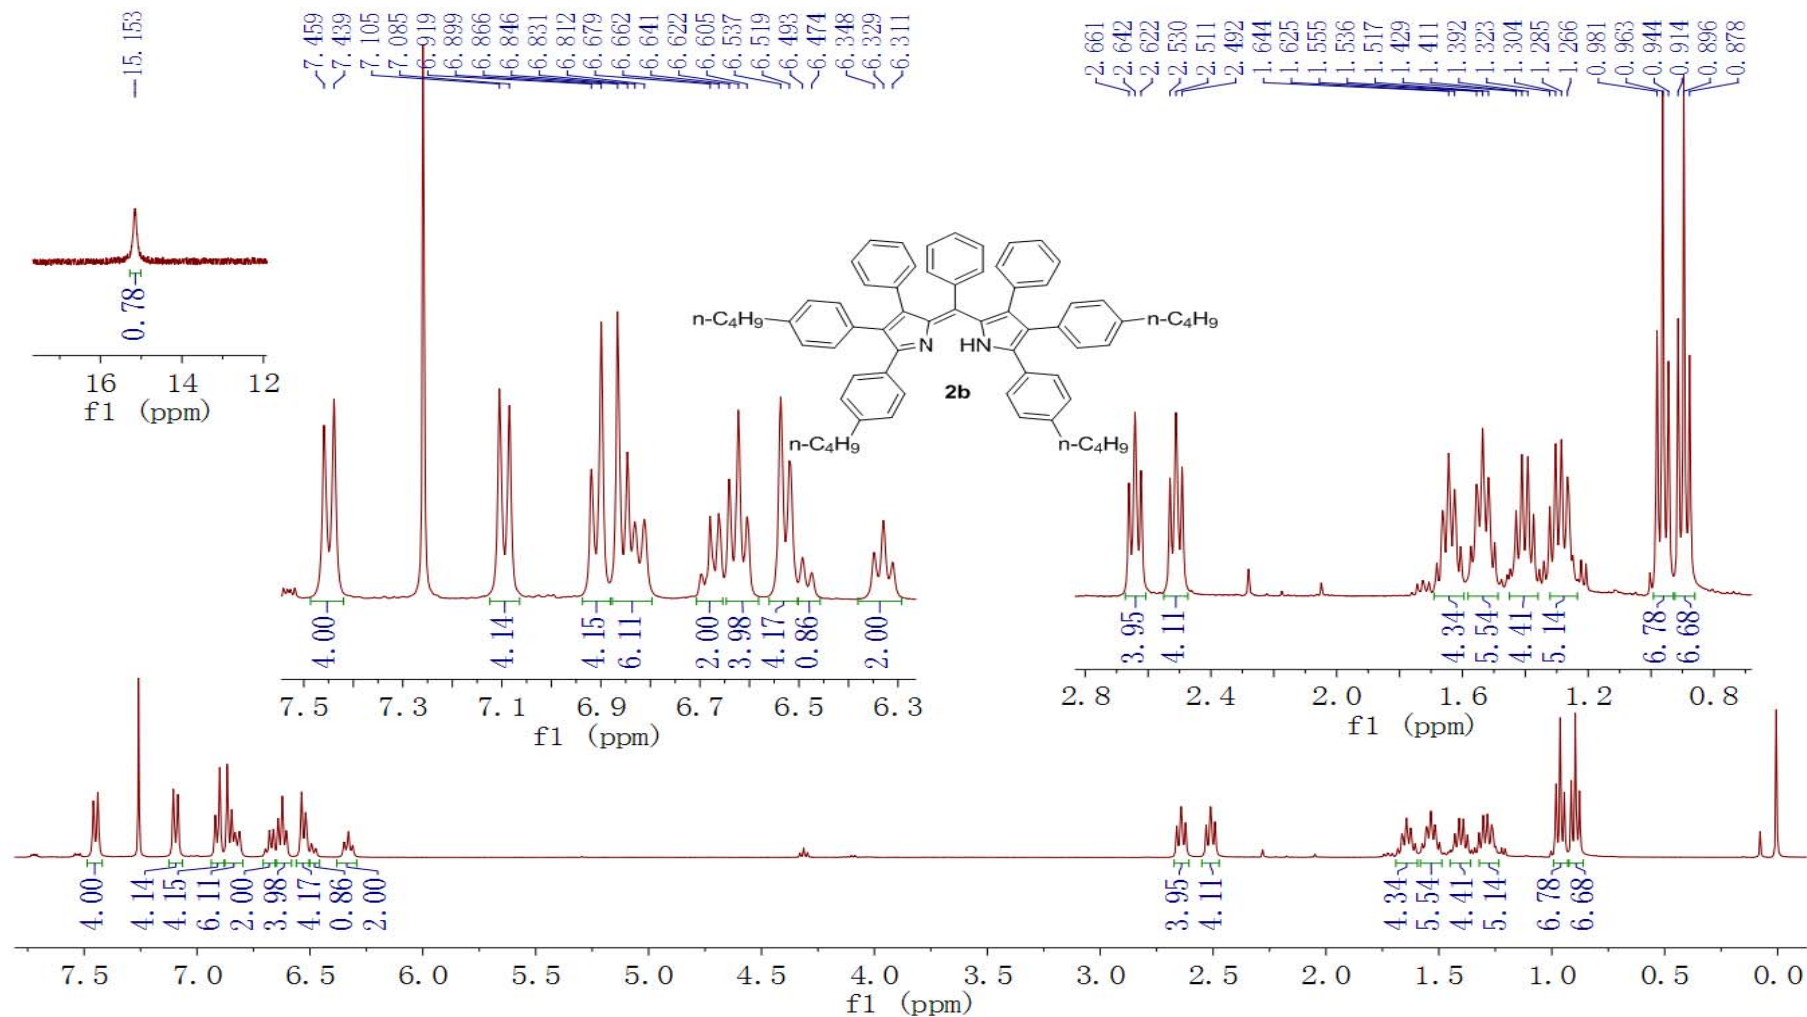

**Figure S29.** The  $^{13}\text{C}$  NMR spectra of **2b**.

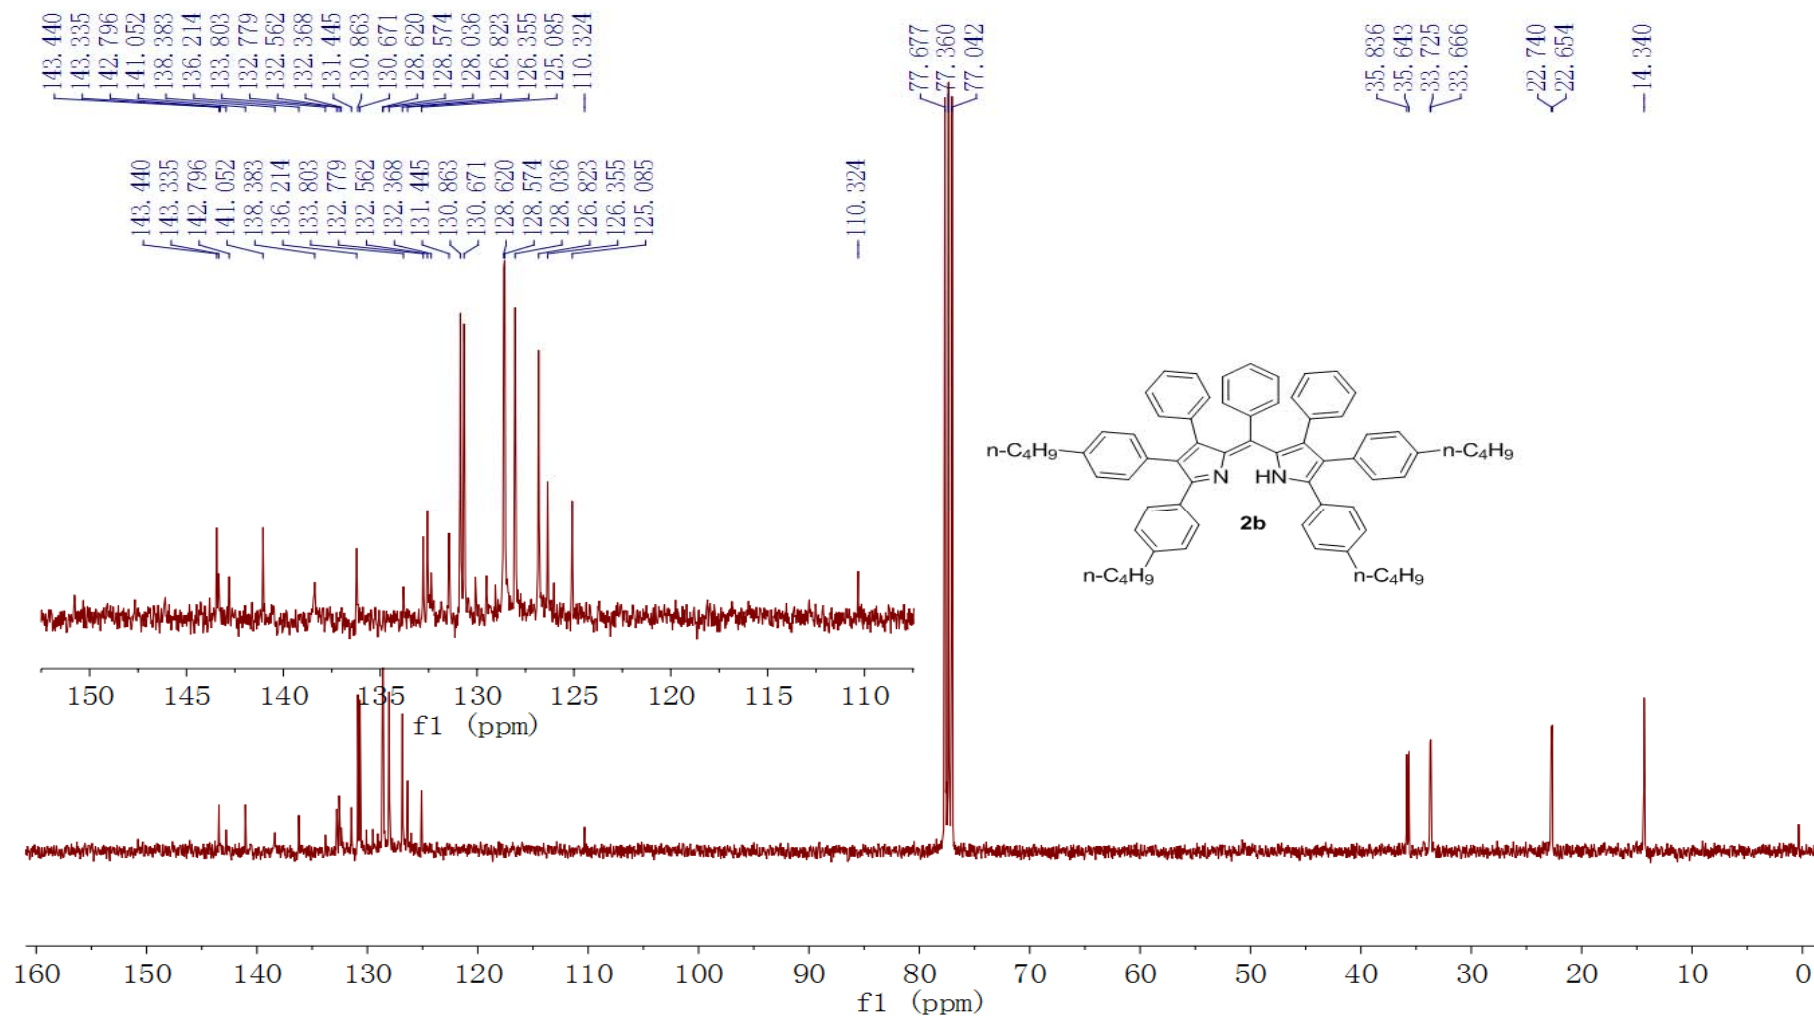

**Figure S30.** The  $^1\text{H}$  NMR spectra of **2c**.

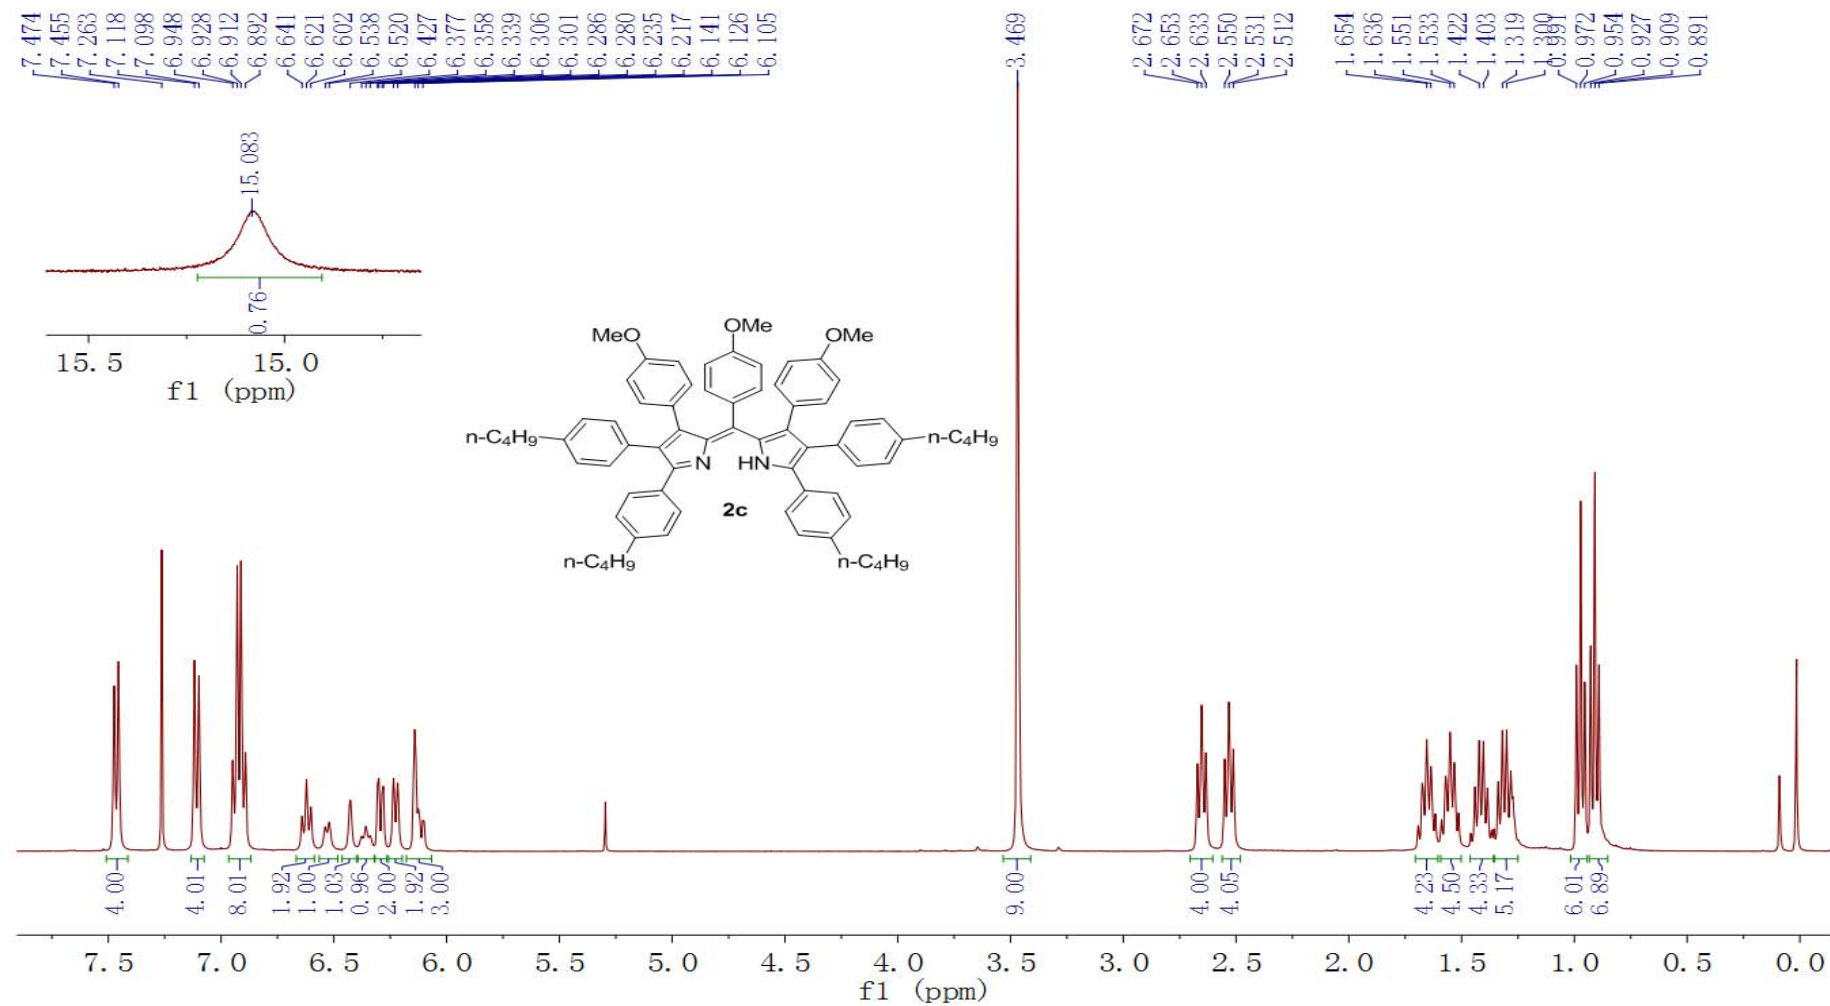

**Figure S31.** The  $^{13}\text{C}$  NMR spectra of **2c**.

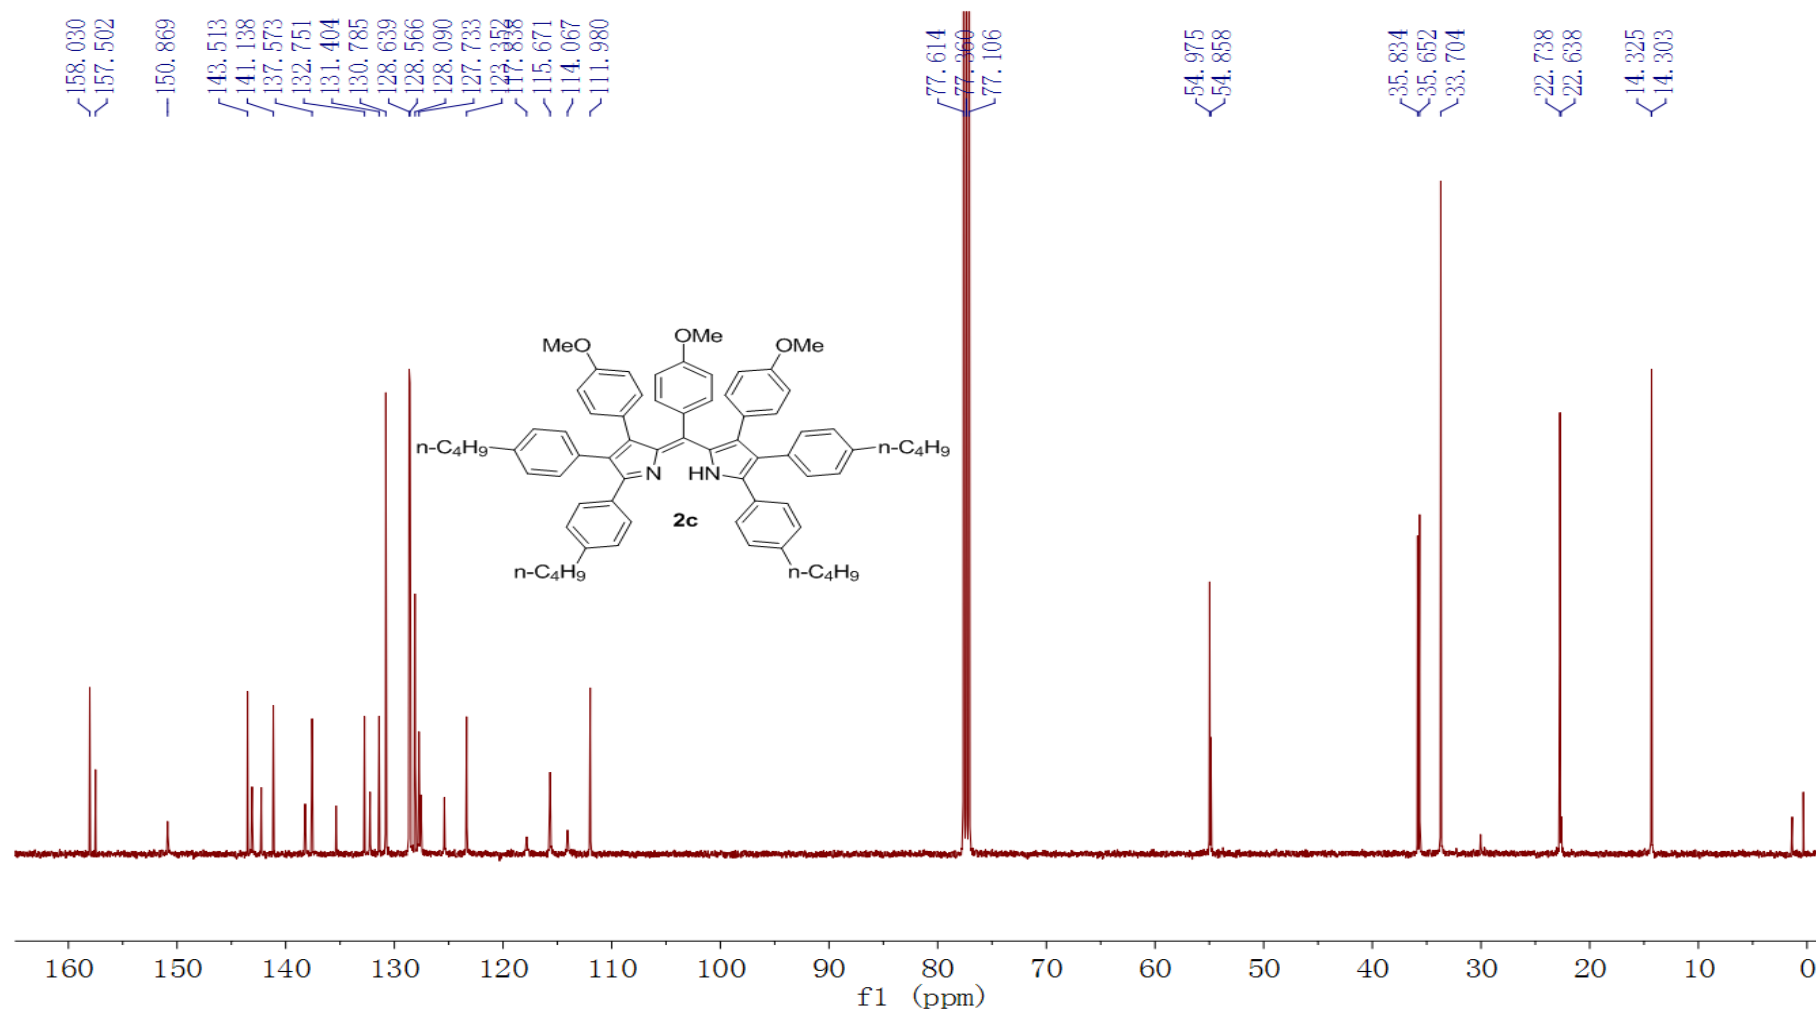

**Figure S32.** The  $^1\text{H}$  NMR spectra of **2d**.

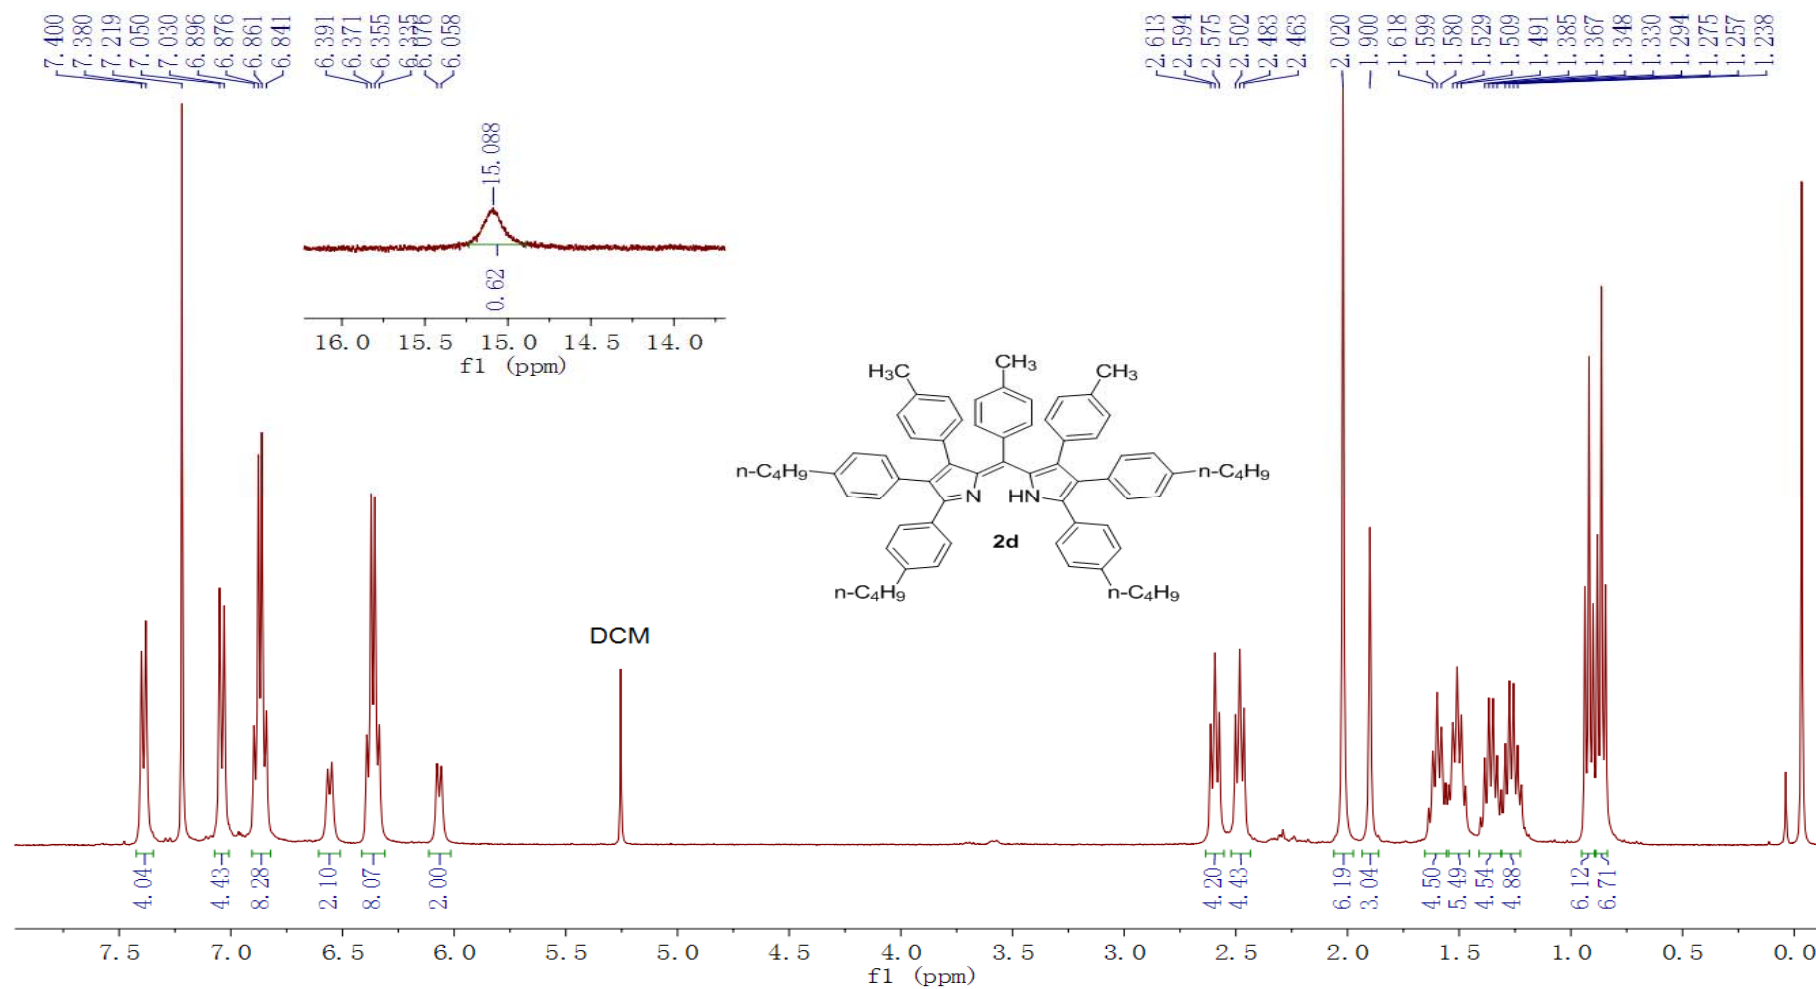

**Figure S33.** The  $^{13}\text{C}$  NMR spectra of **2d**.

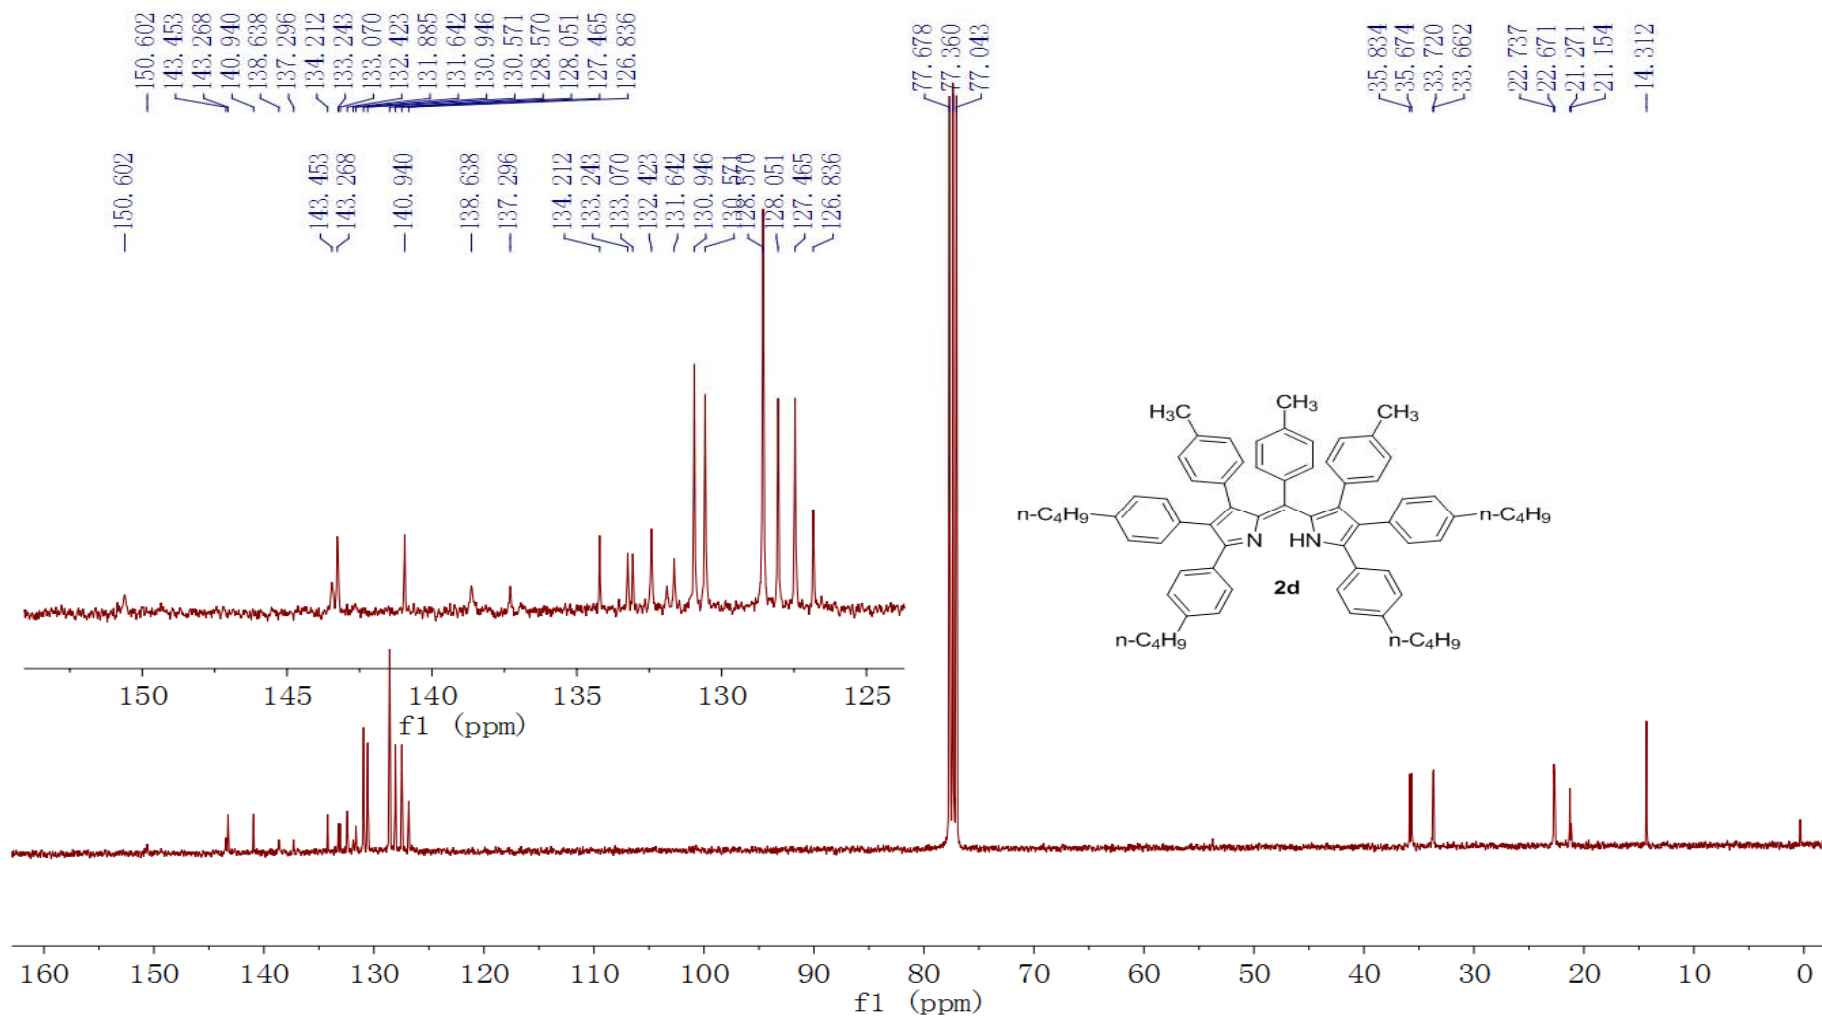



**Figure S34.** The  $^1\text{H}$  NMR spectra of **2e**.

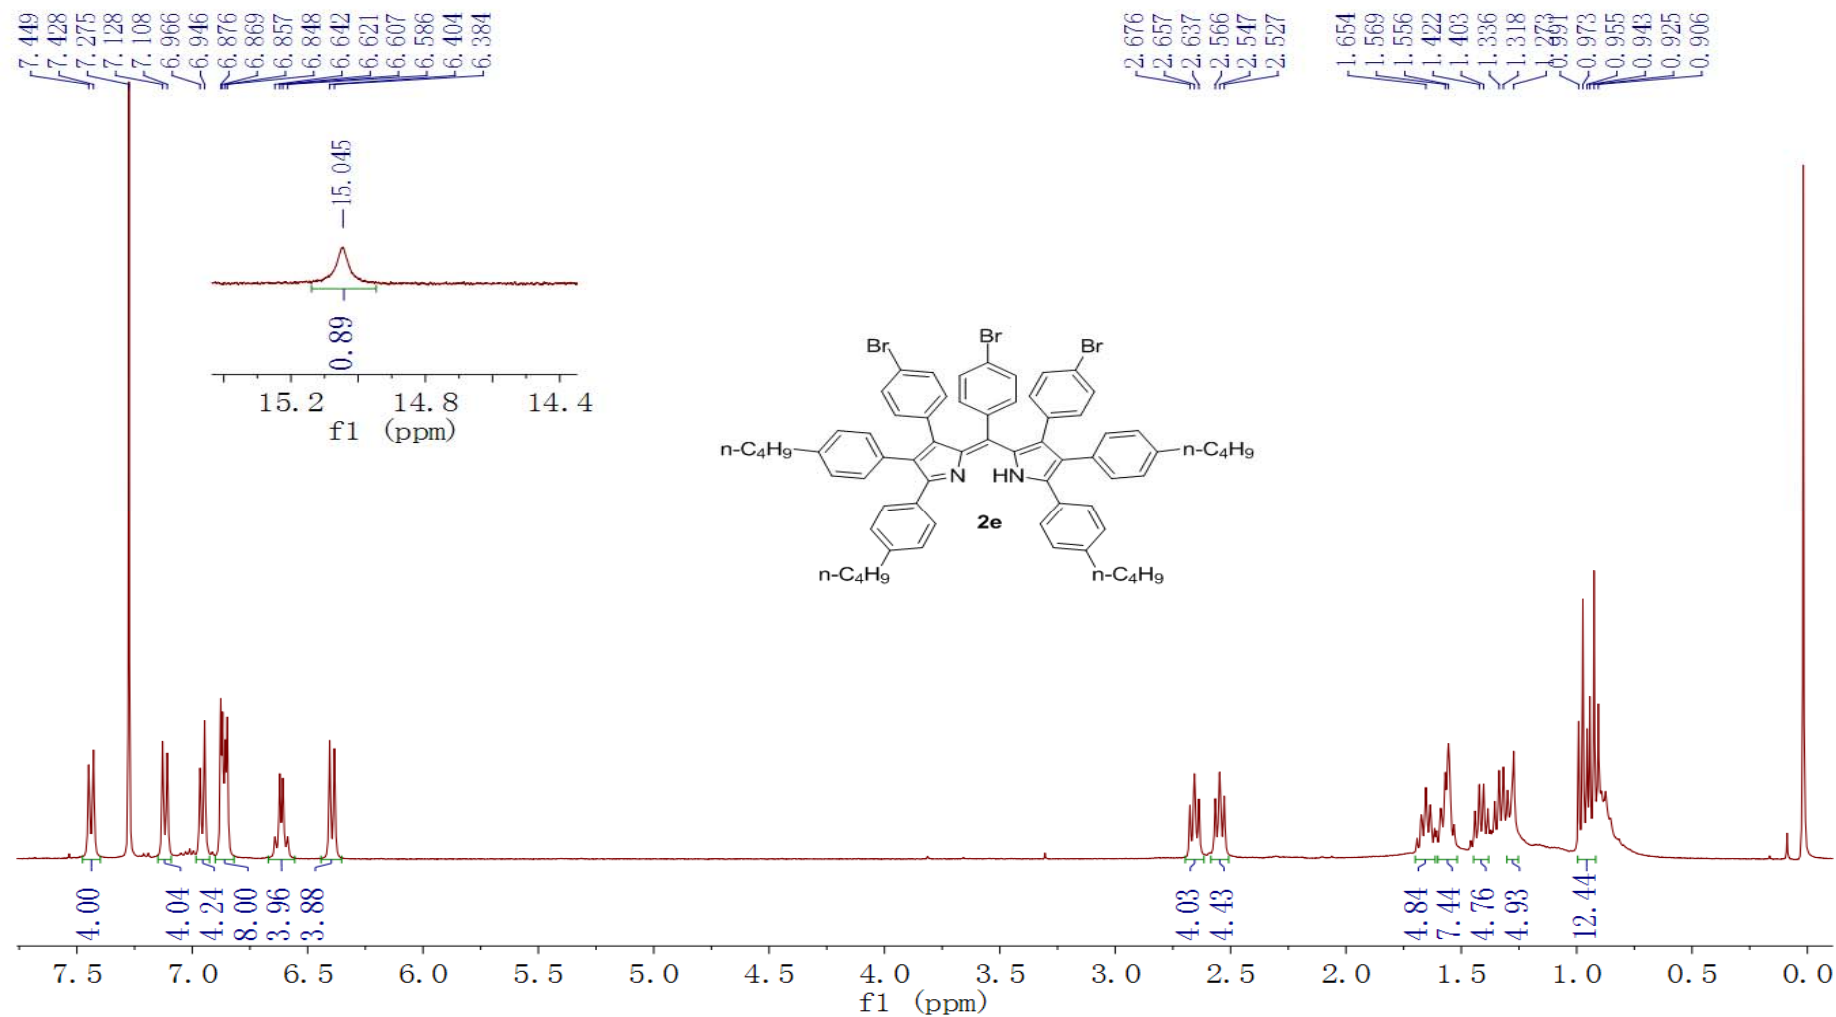

**Figure S35.** The  $^{13}\text{C}$  NMR spectra of **2e**.

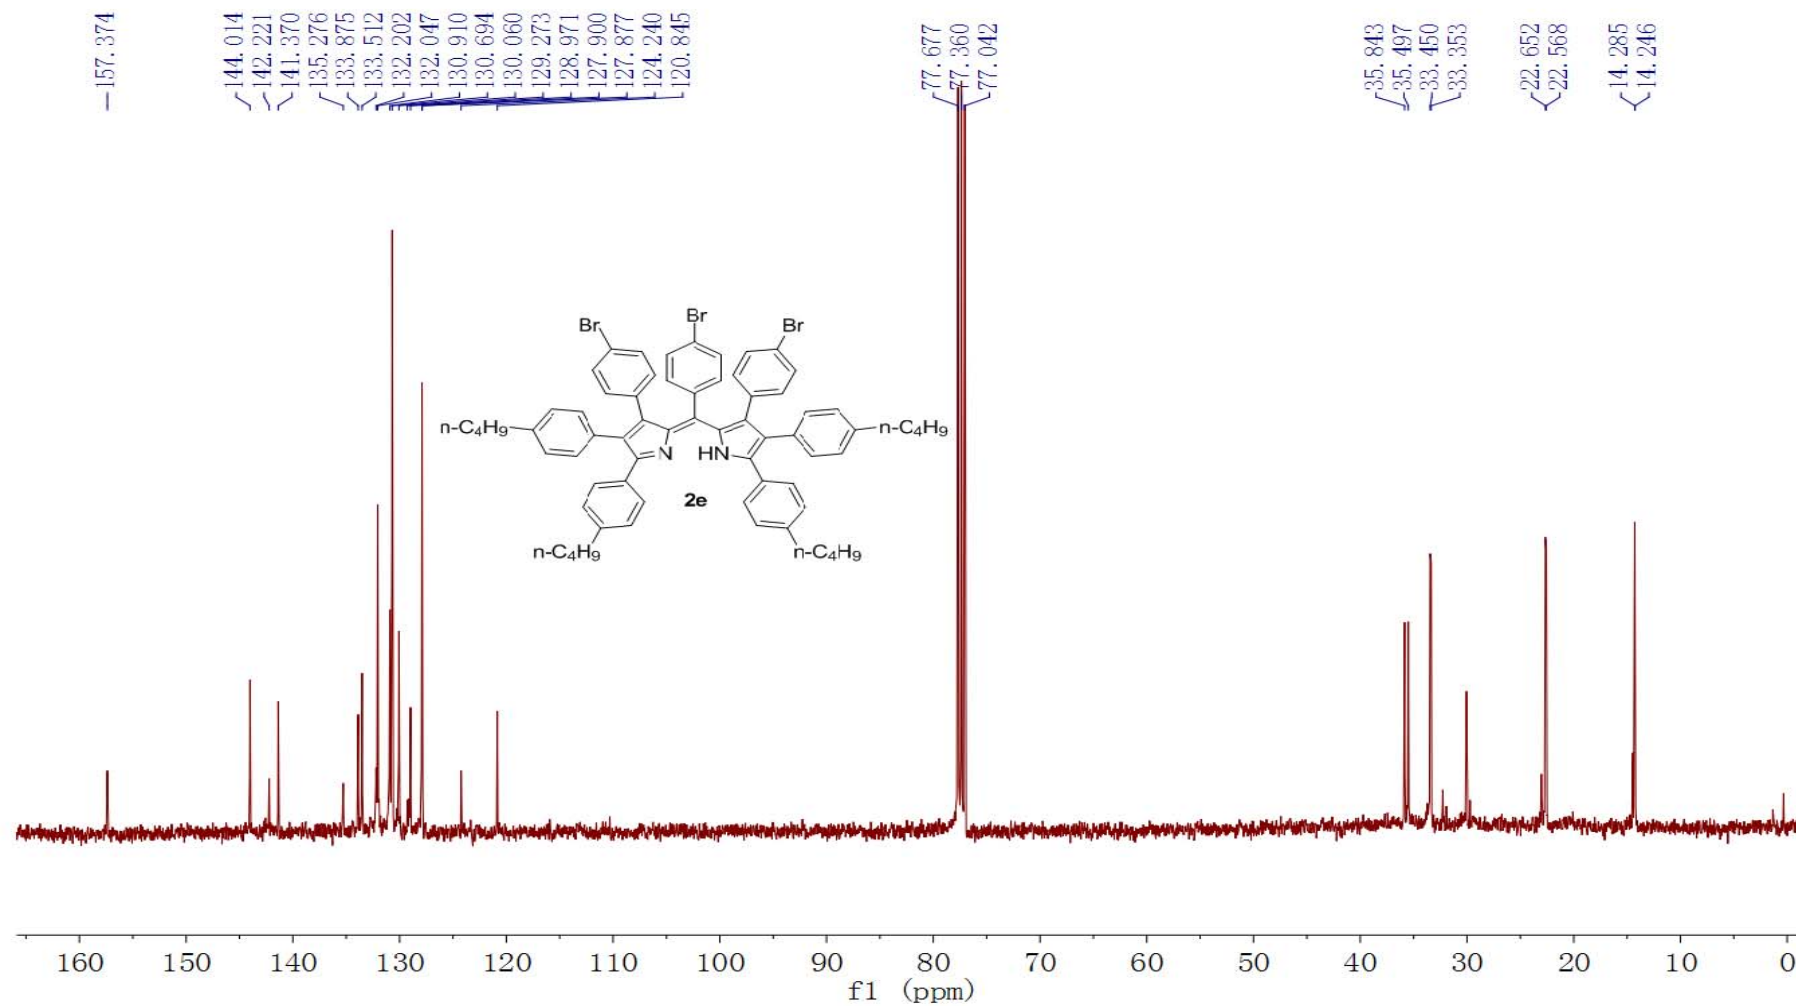

**Figure S36.** The  $^1\text{H}$  NMR spectra of **2f**.

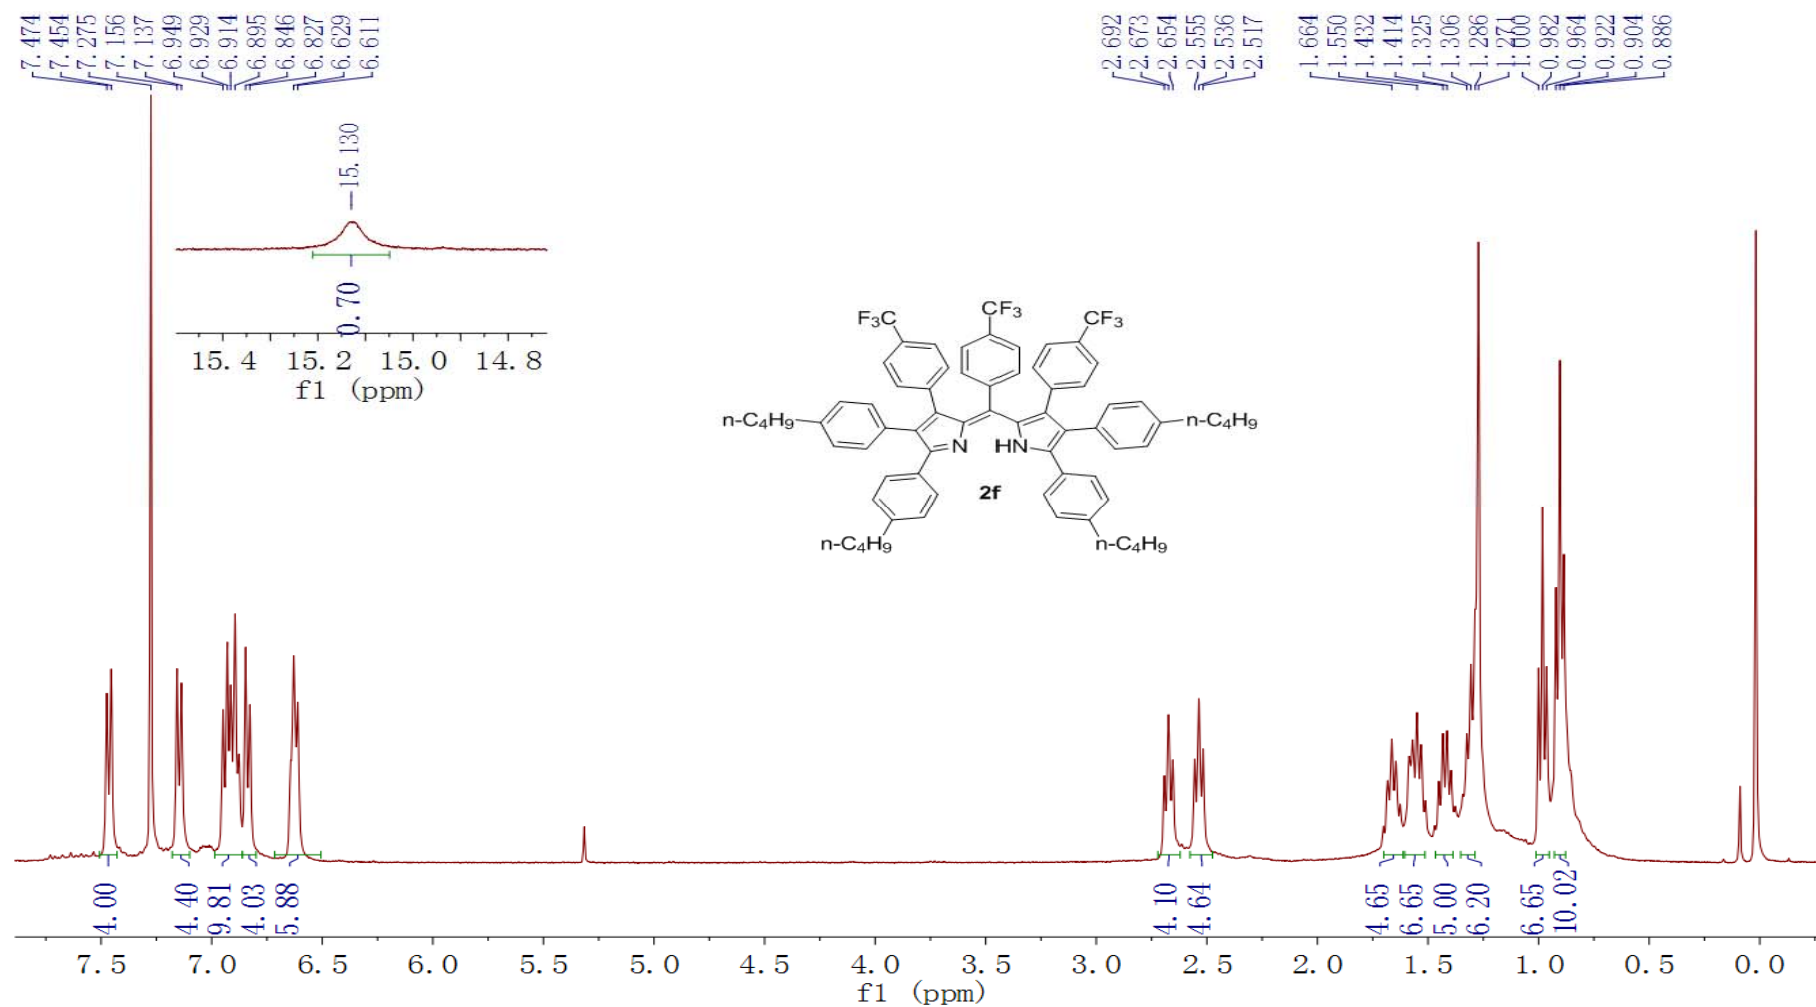

**Figure S37.** The  $^{13}\text{C}$  NMR spectra of **2f**.

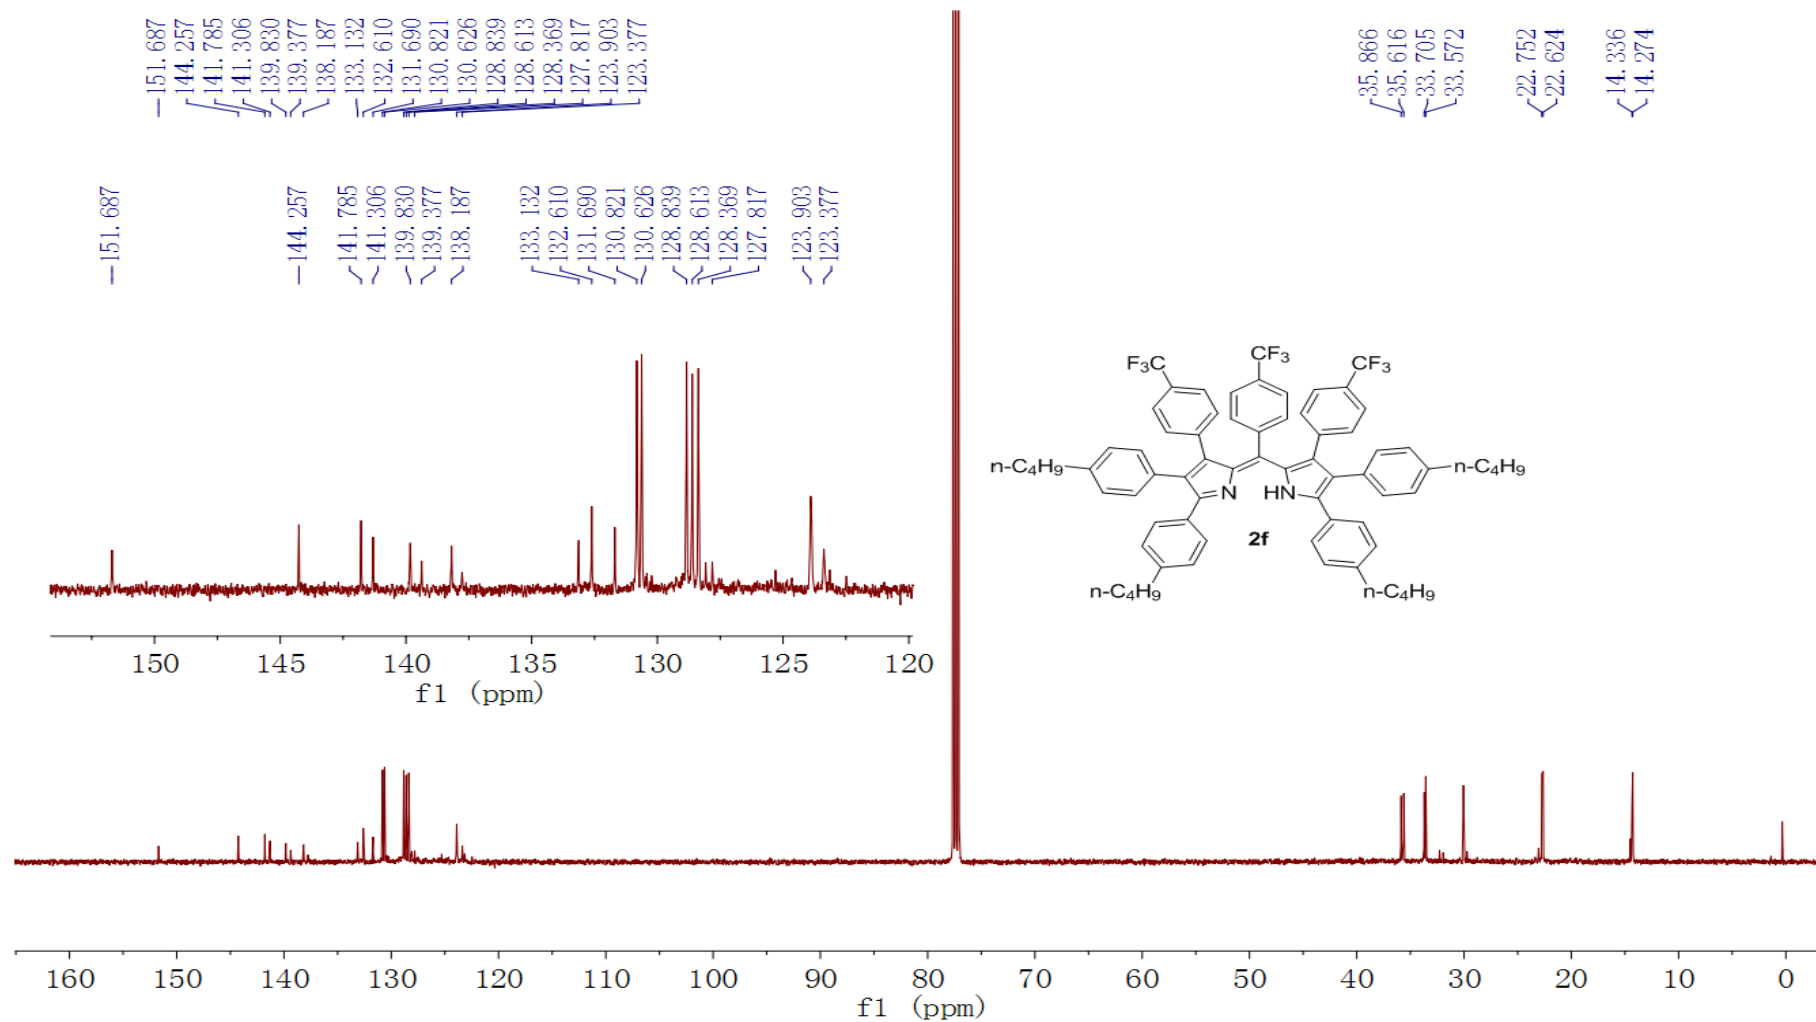

**Figure S38.** The  $^1\text{H}$  NMR spectra of **2g**.

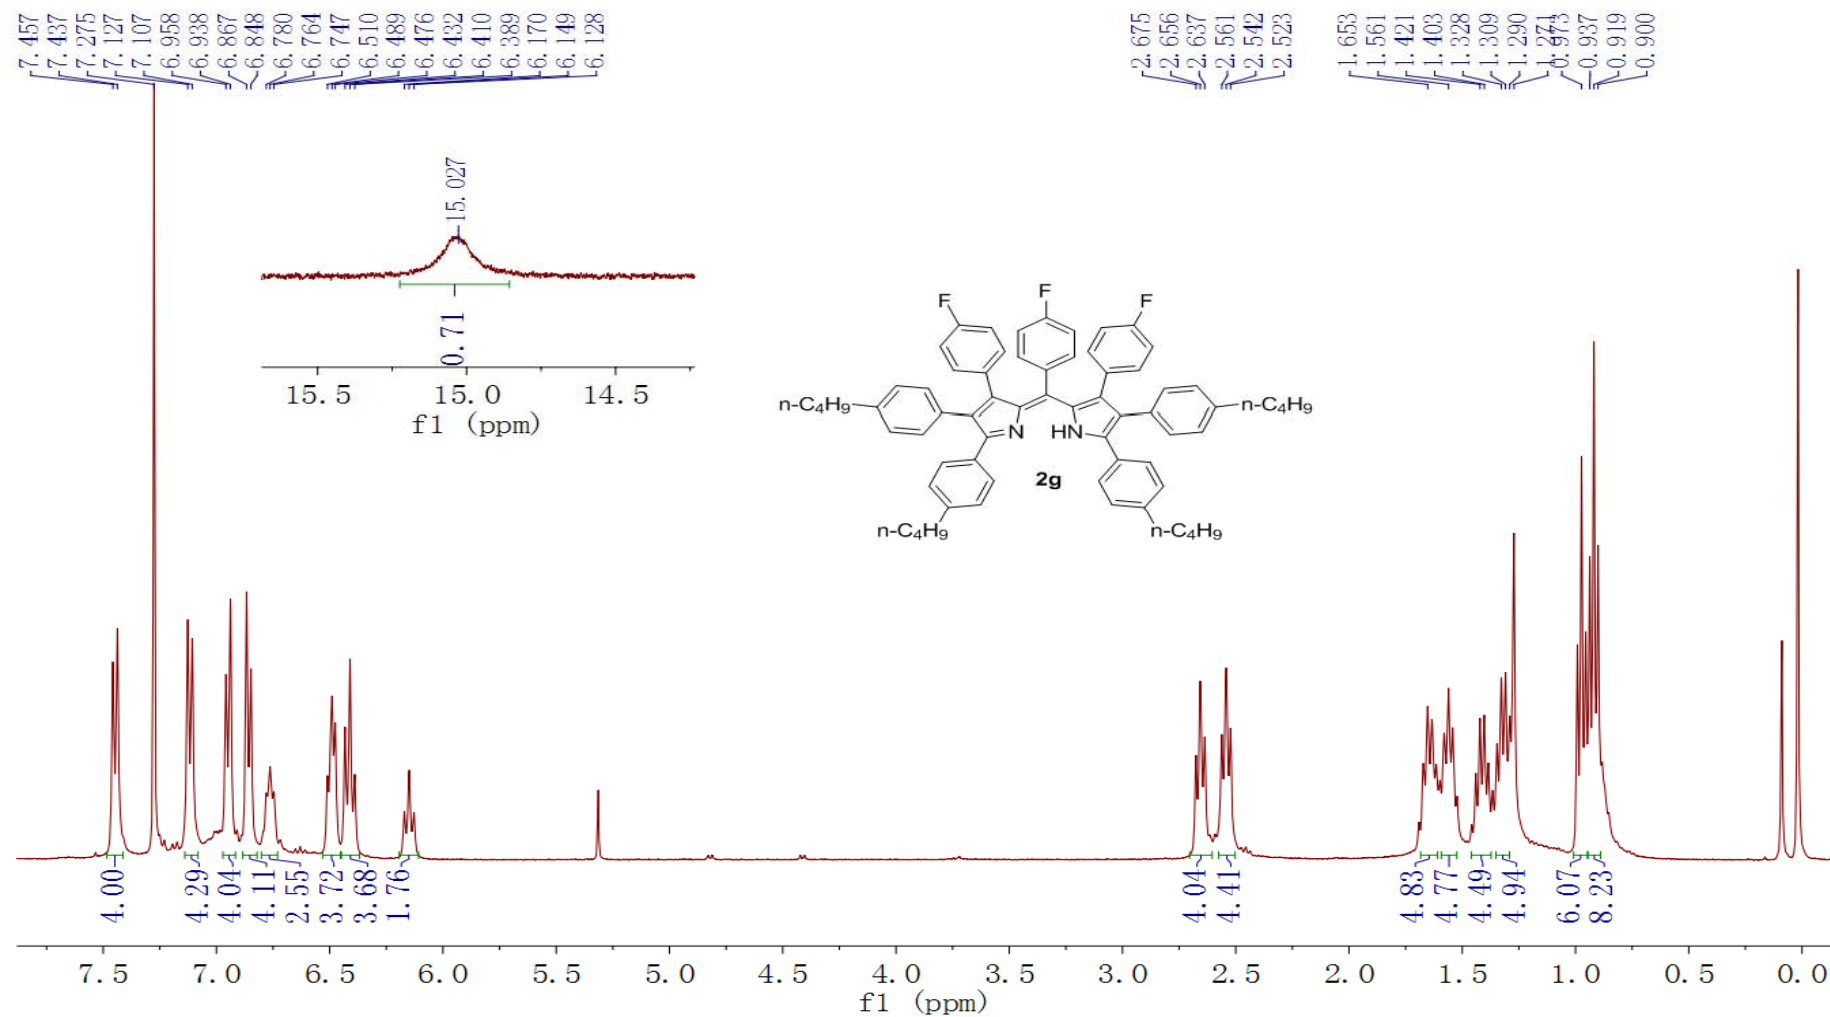

**Figure S39.** The  $^{13}\text{C}$  NMR spectra of **2g**.

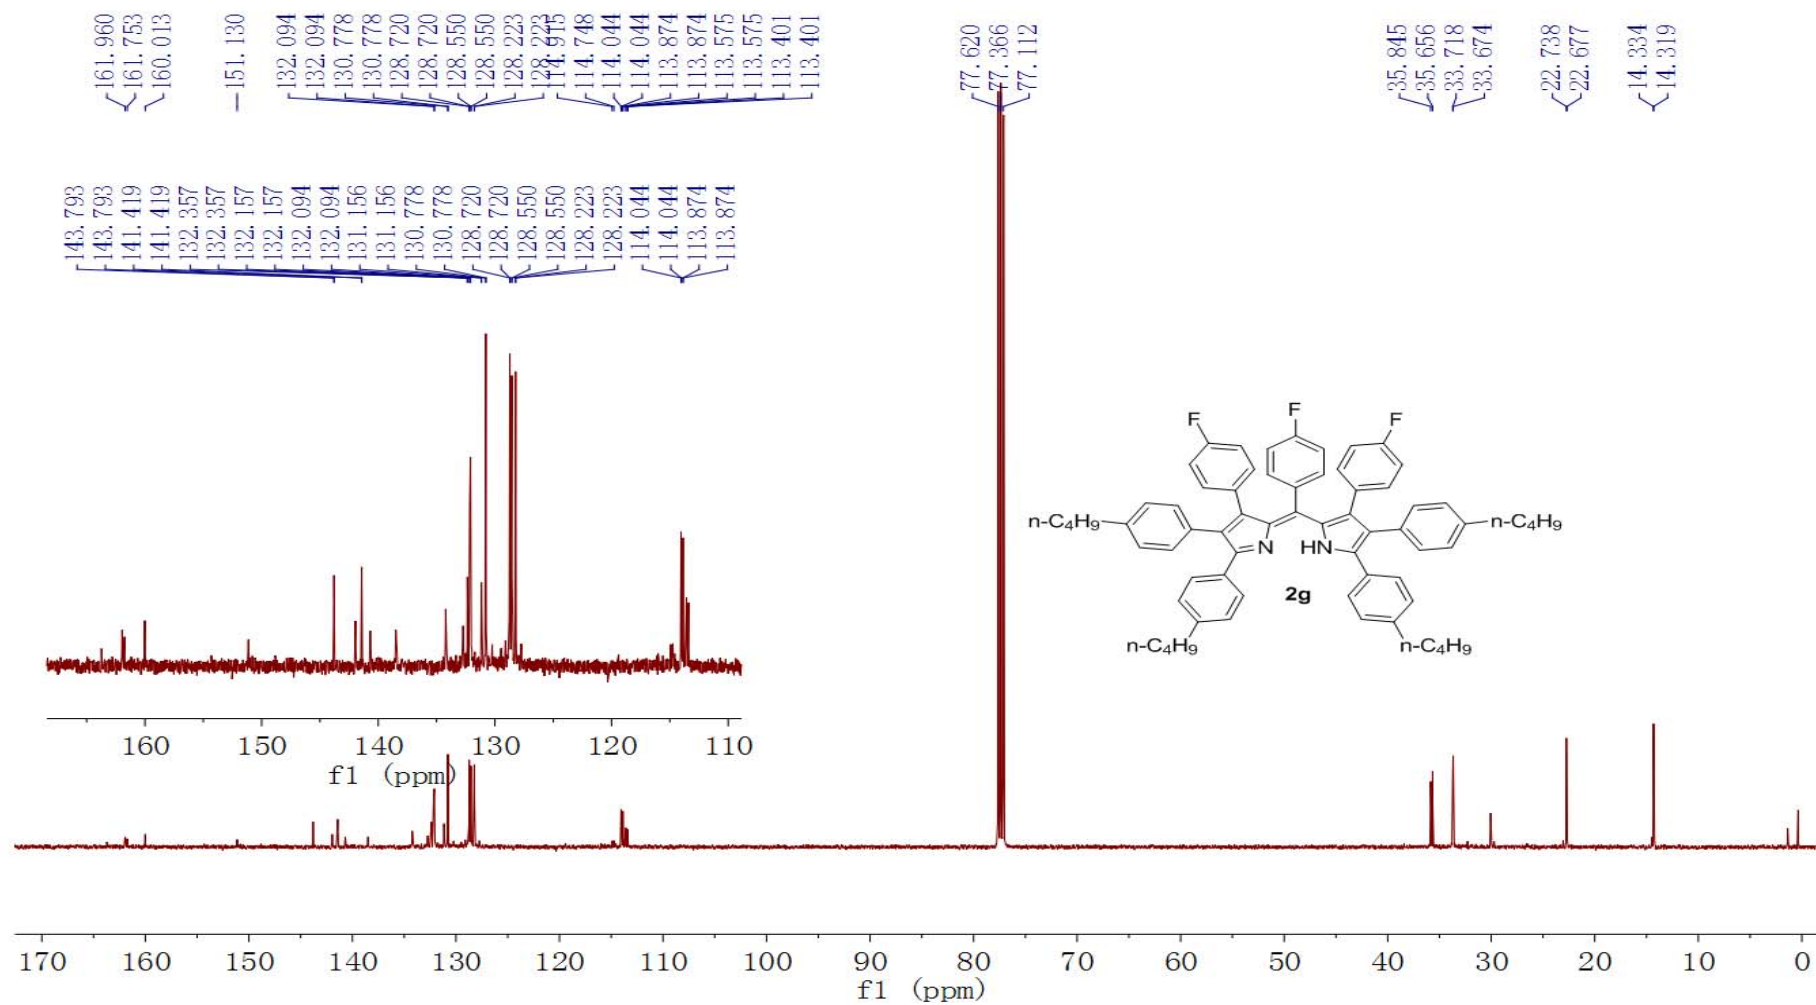

**Figure S40.** The  $^1\text{H}$  NMR spectra of **2h**.

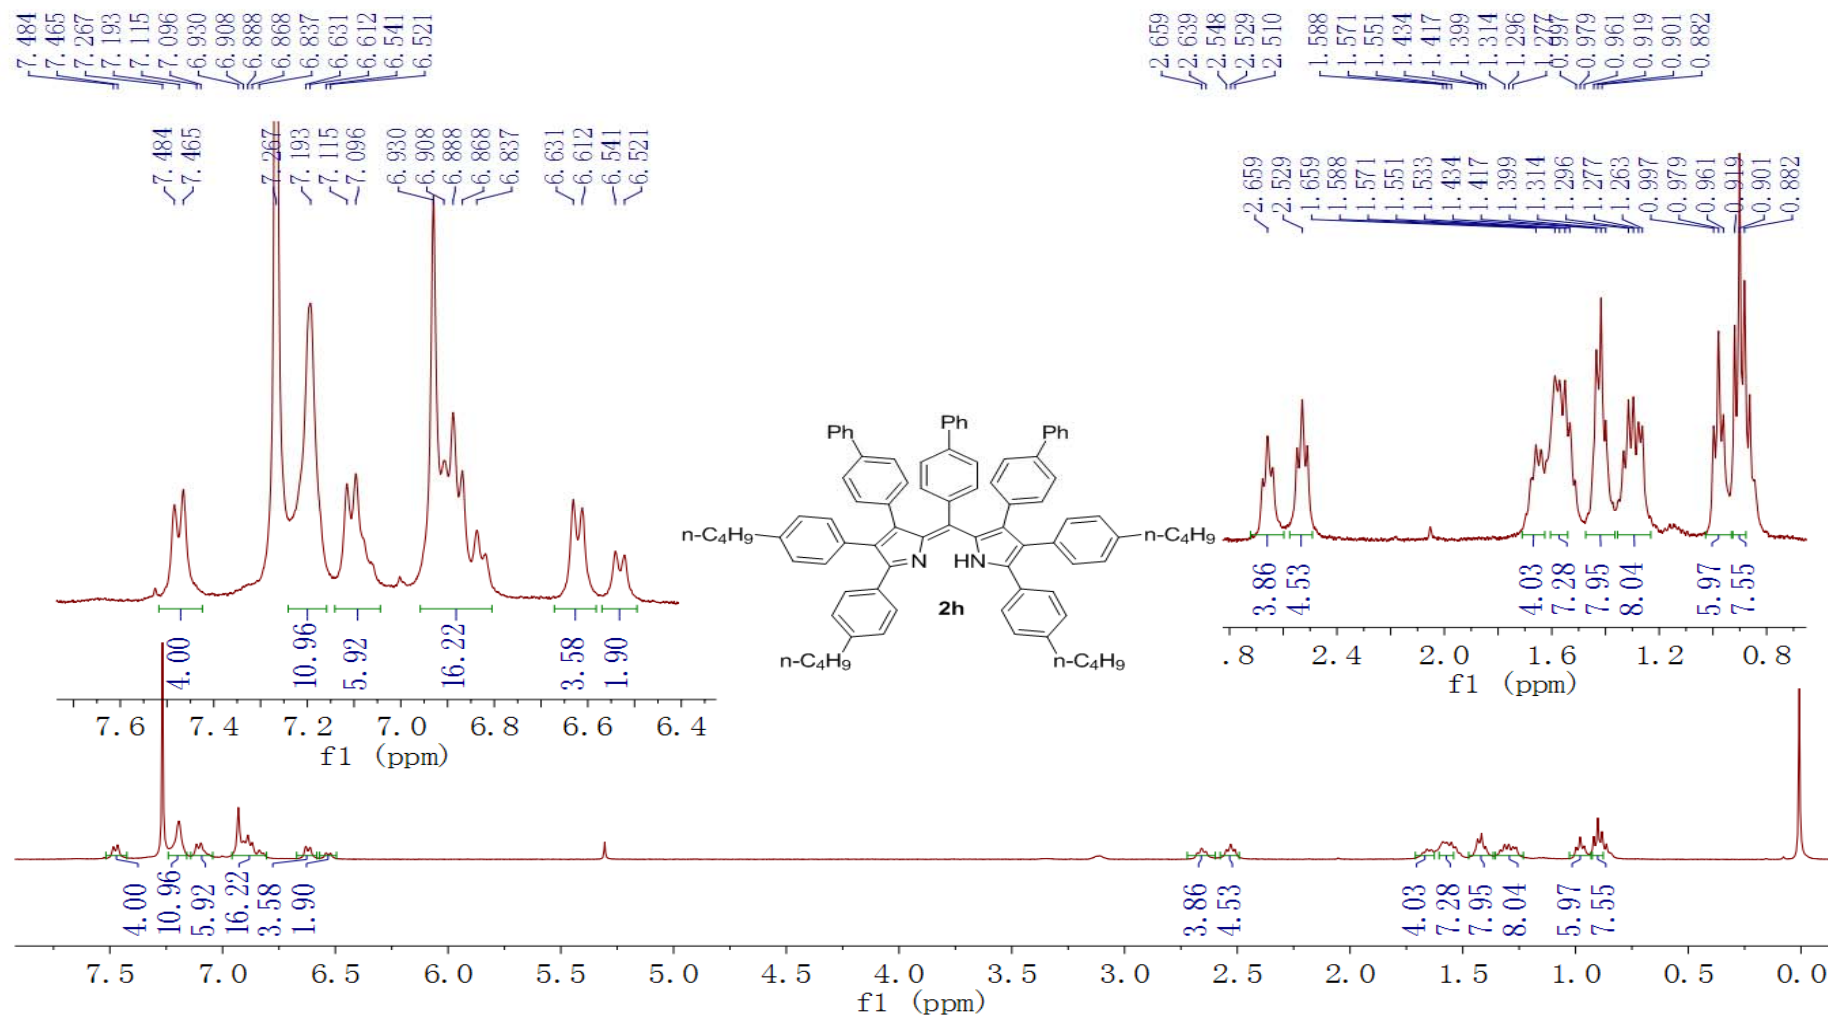



**Figure S41.** The  $^{13}\text{C}$  NMR spectra of **2h**.

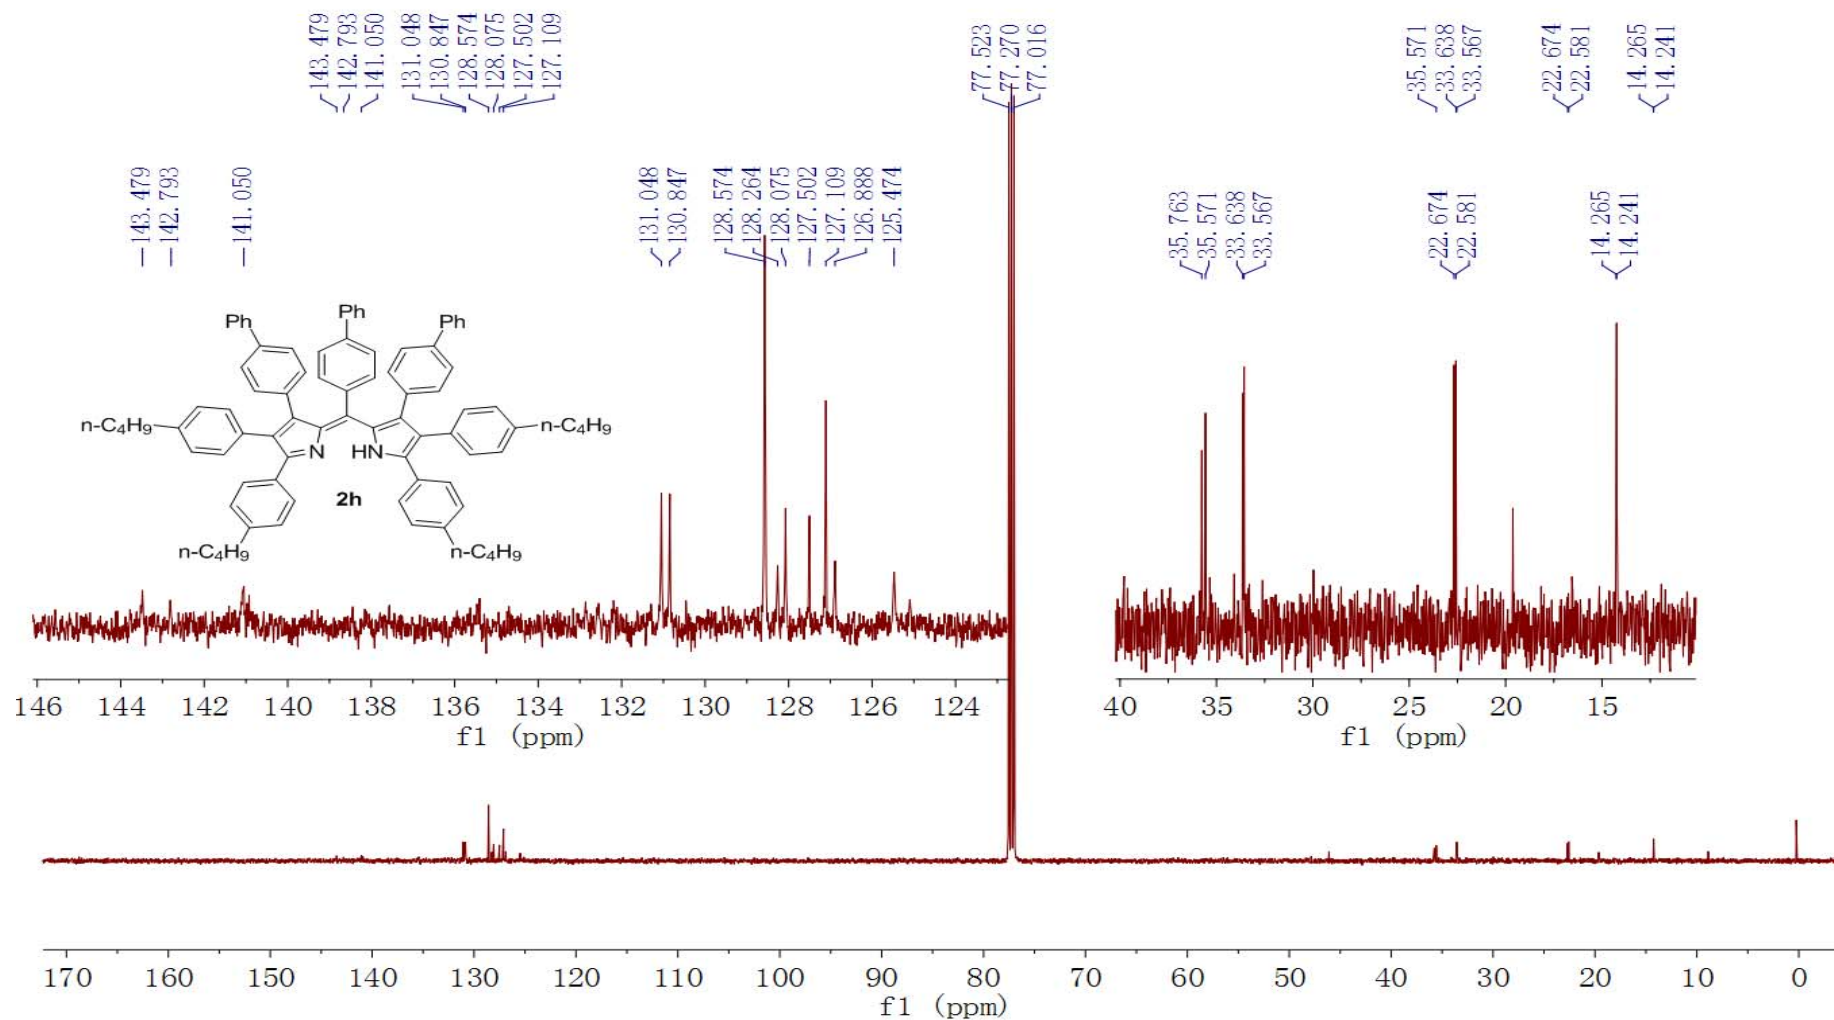



**Figure S42.** The  $^1\text{H}$  NMR spectra of **2i**.

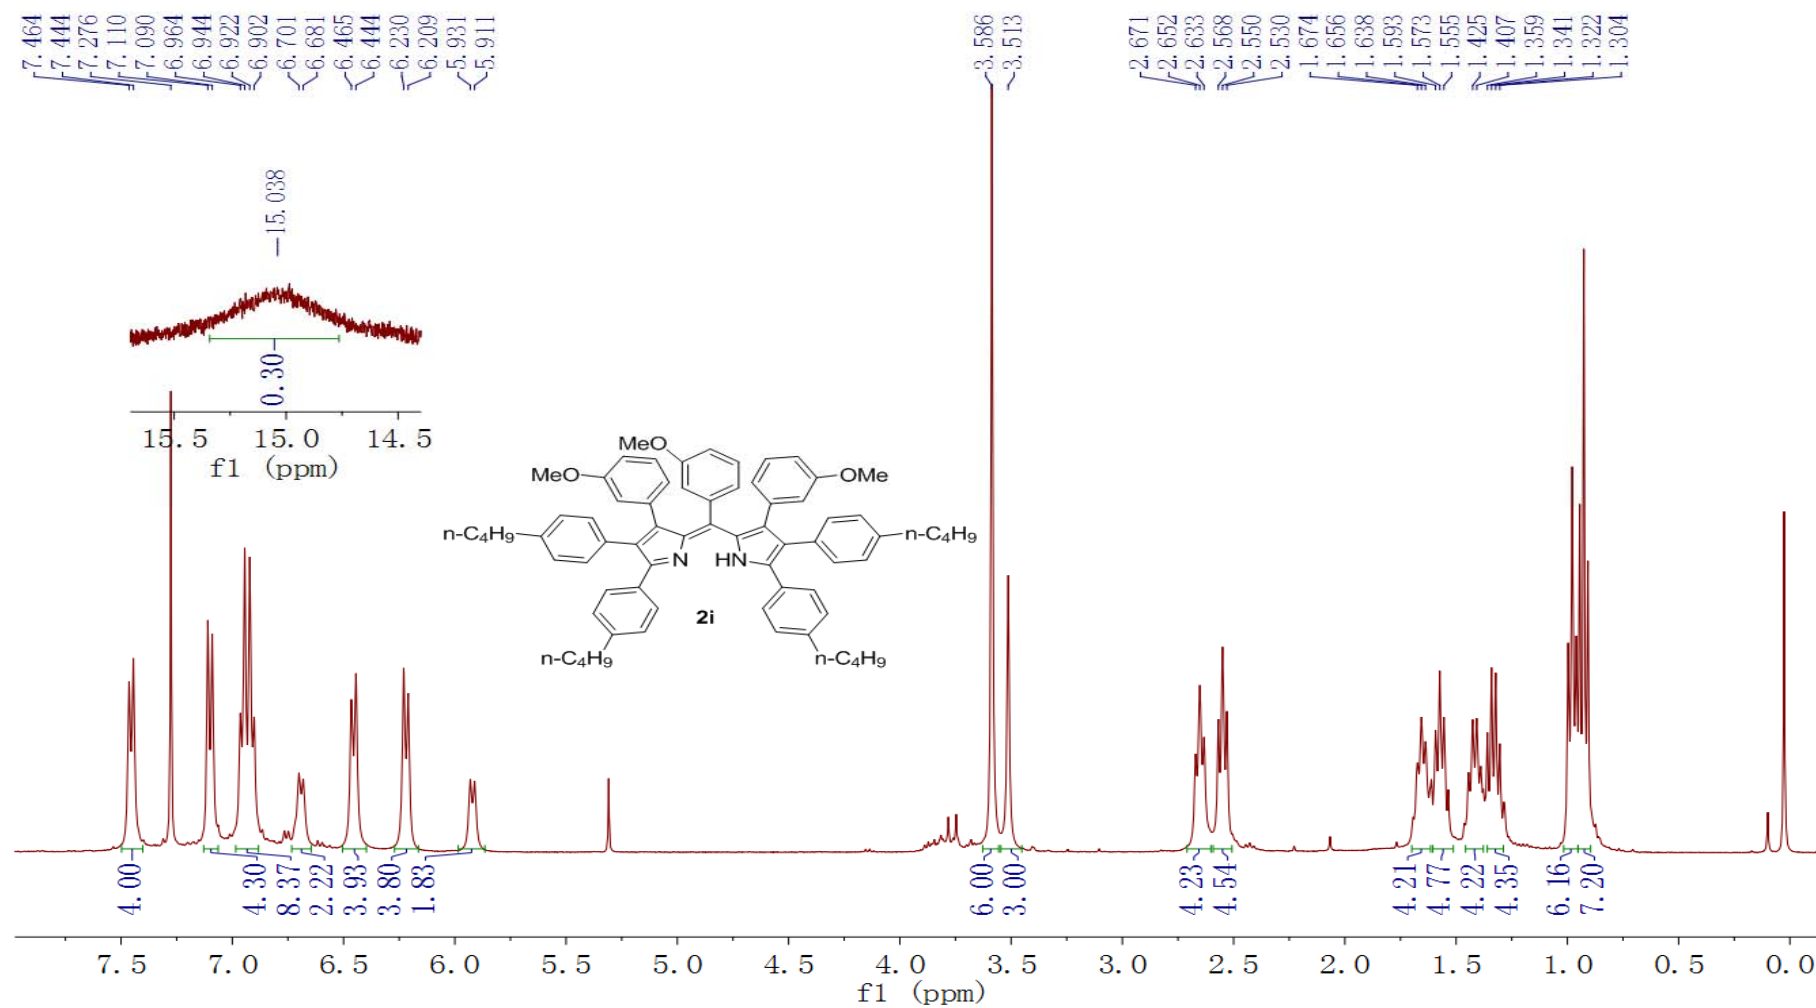

**Figure S43.** The  $^1\text{H}$  NMR spectra of **2j**.

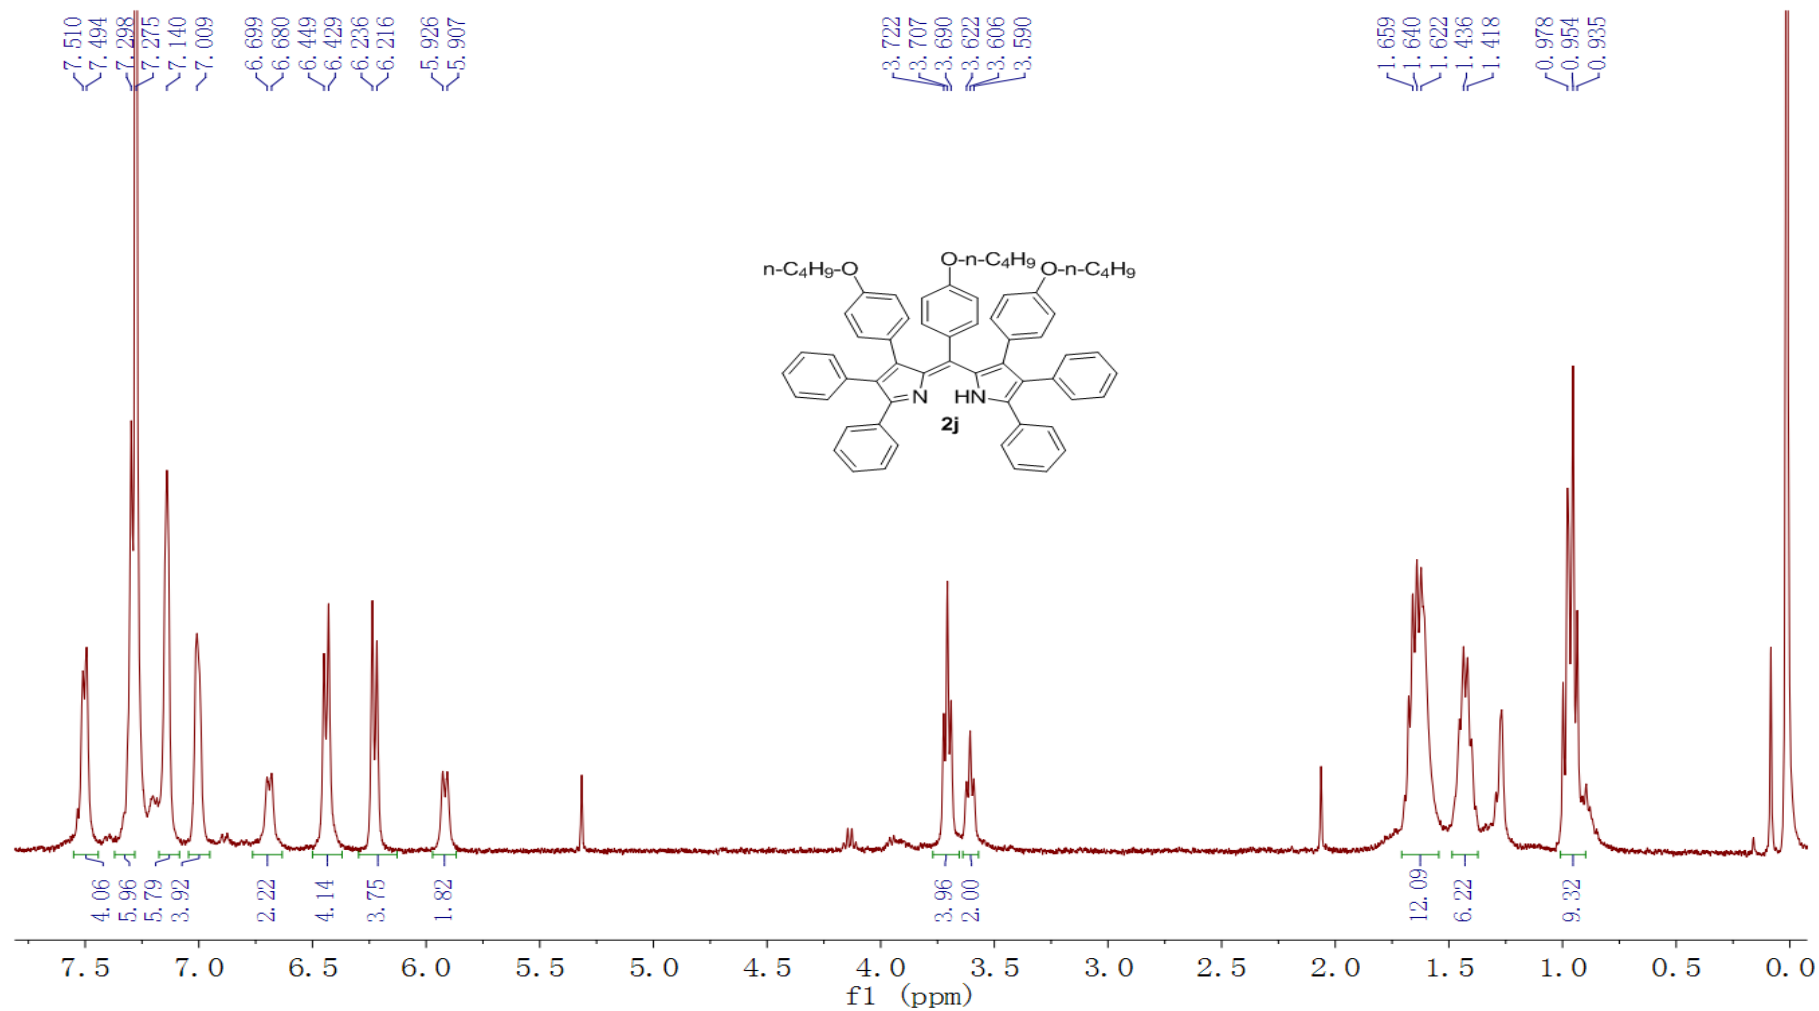

**Figure S44.** The  $^{13}\text{C}$  NMR spectra of **2j**.

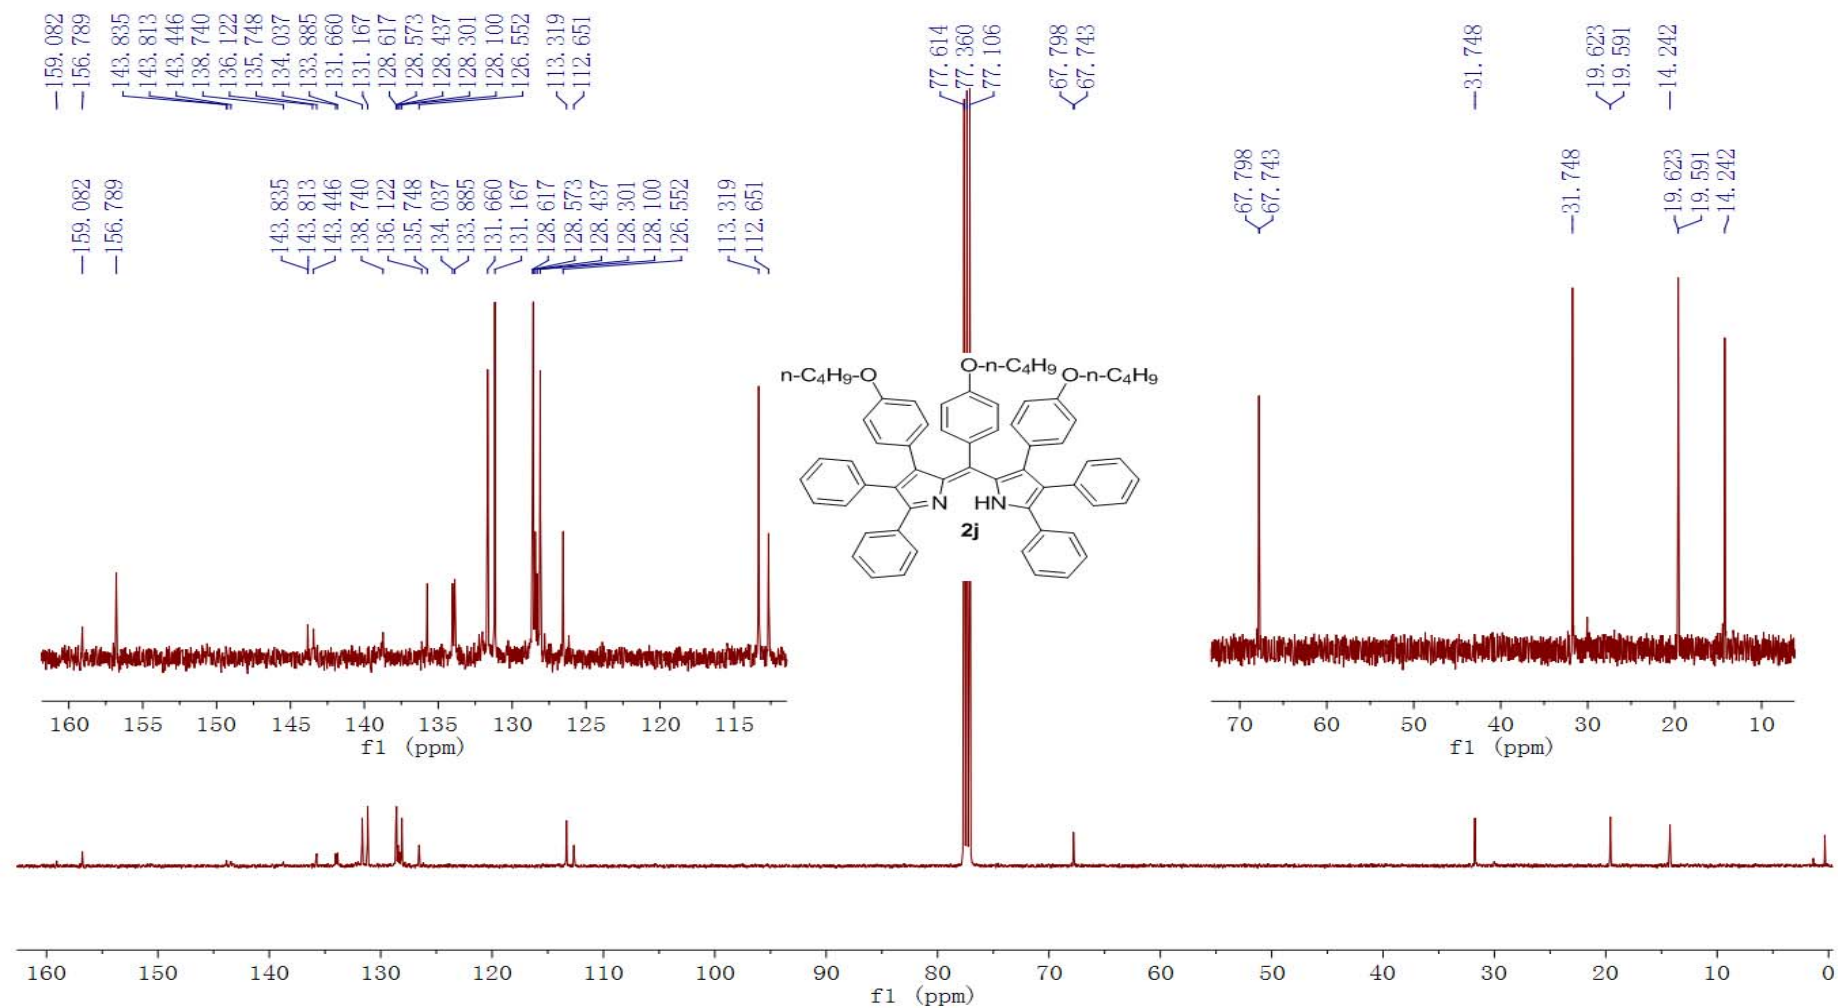

**Figure S45.** The  $^1\text{H}$  NMR spectra of **2k**.

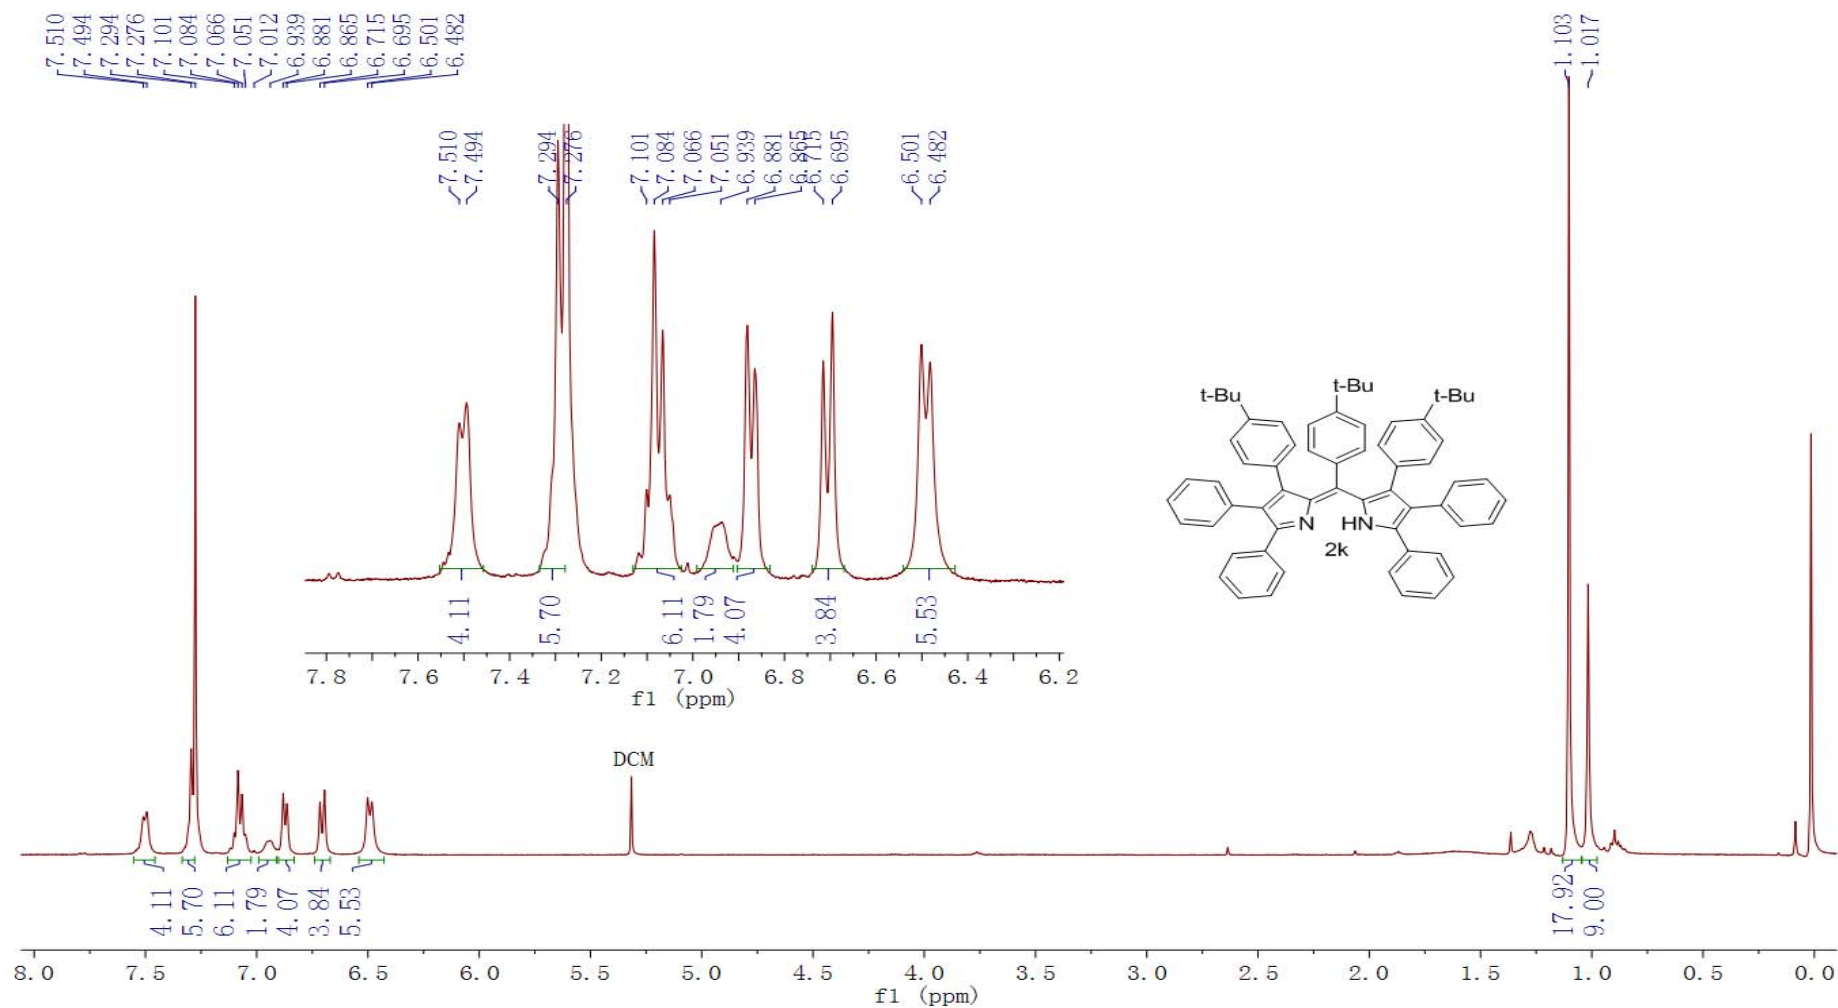

**Figure S46.** The  $^{13}\text{C}$  NMR spectra of **2k**.

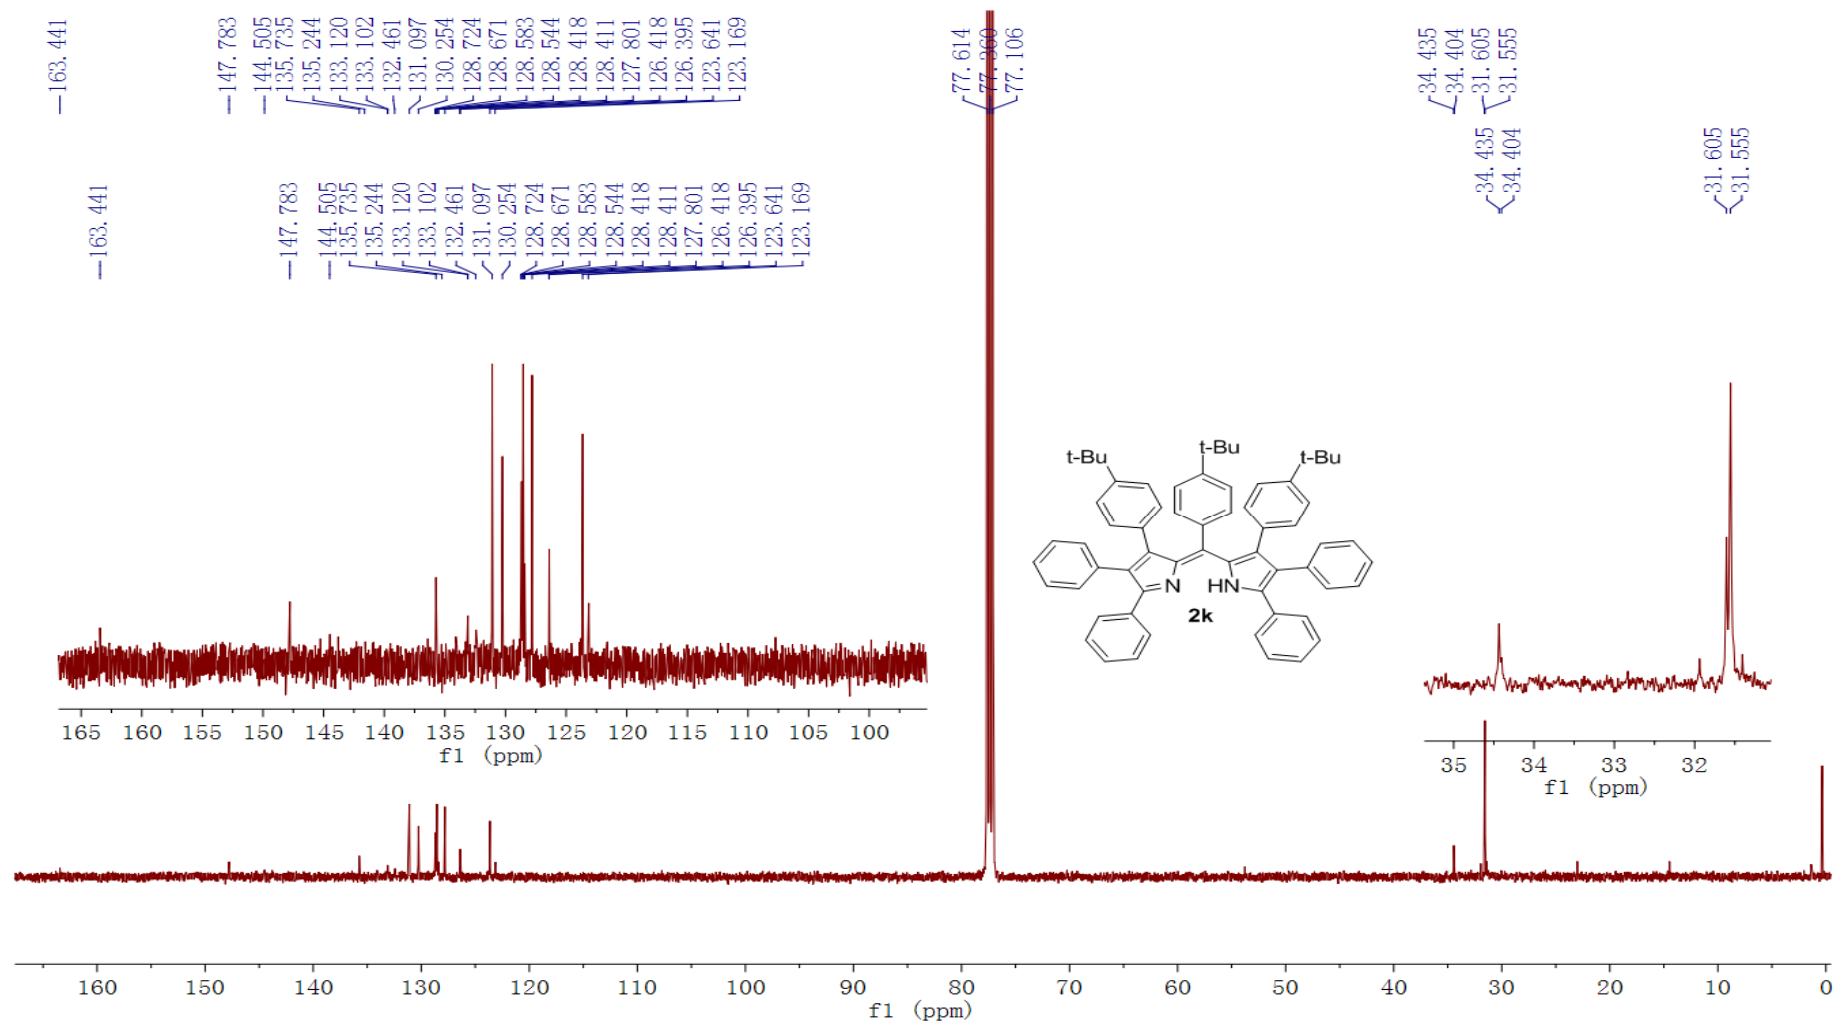

**Figure S47.** The  $^1\text{H}$  NMR spectra of **2l**.

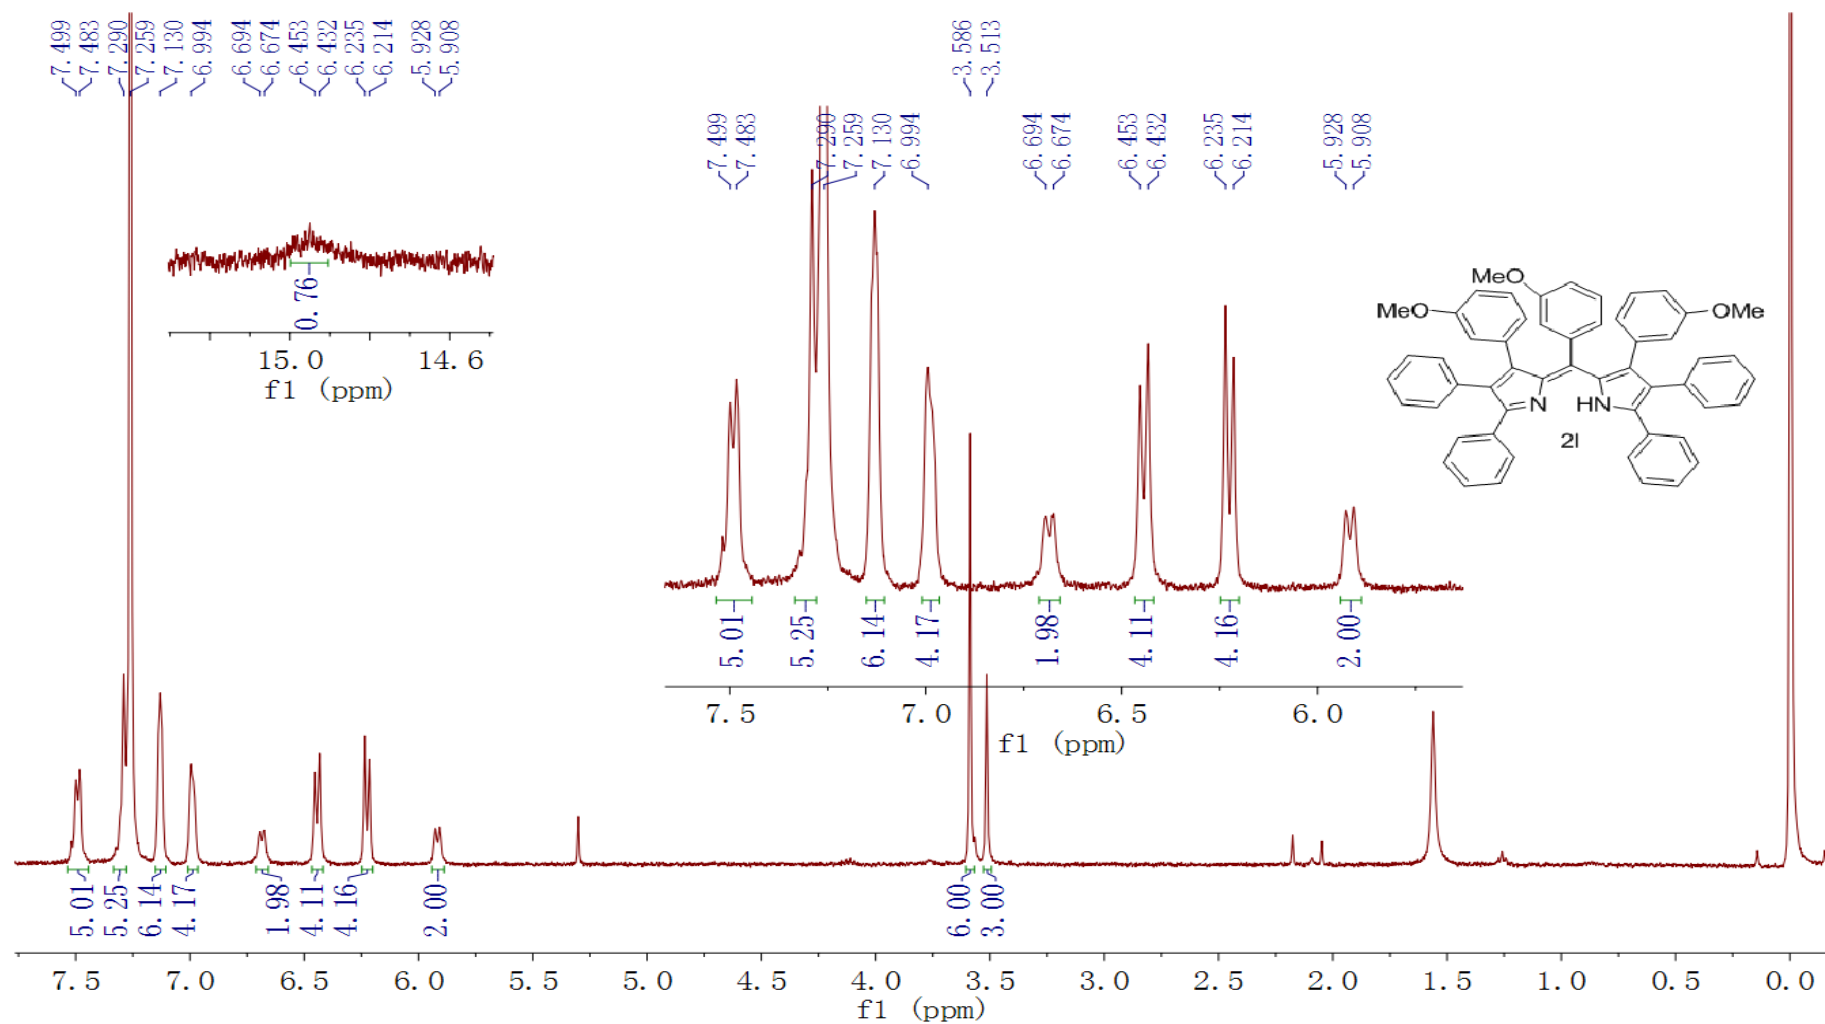

**Figure S48.** The  $^1\text{H}$  NMR spectra of **2m**.

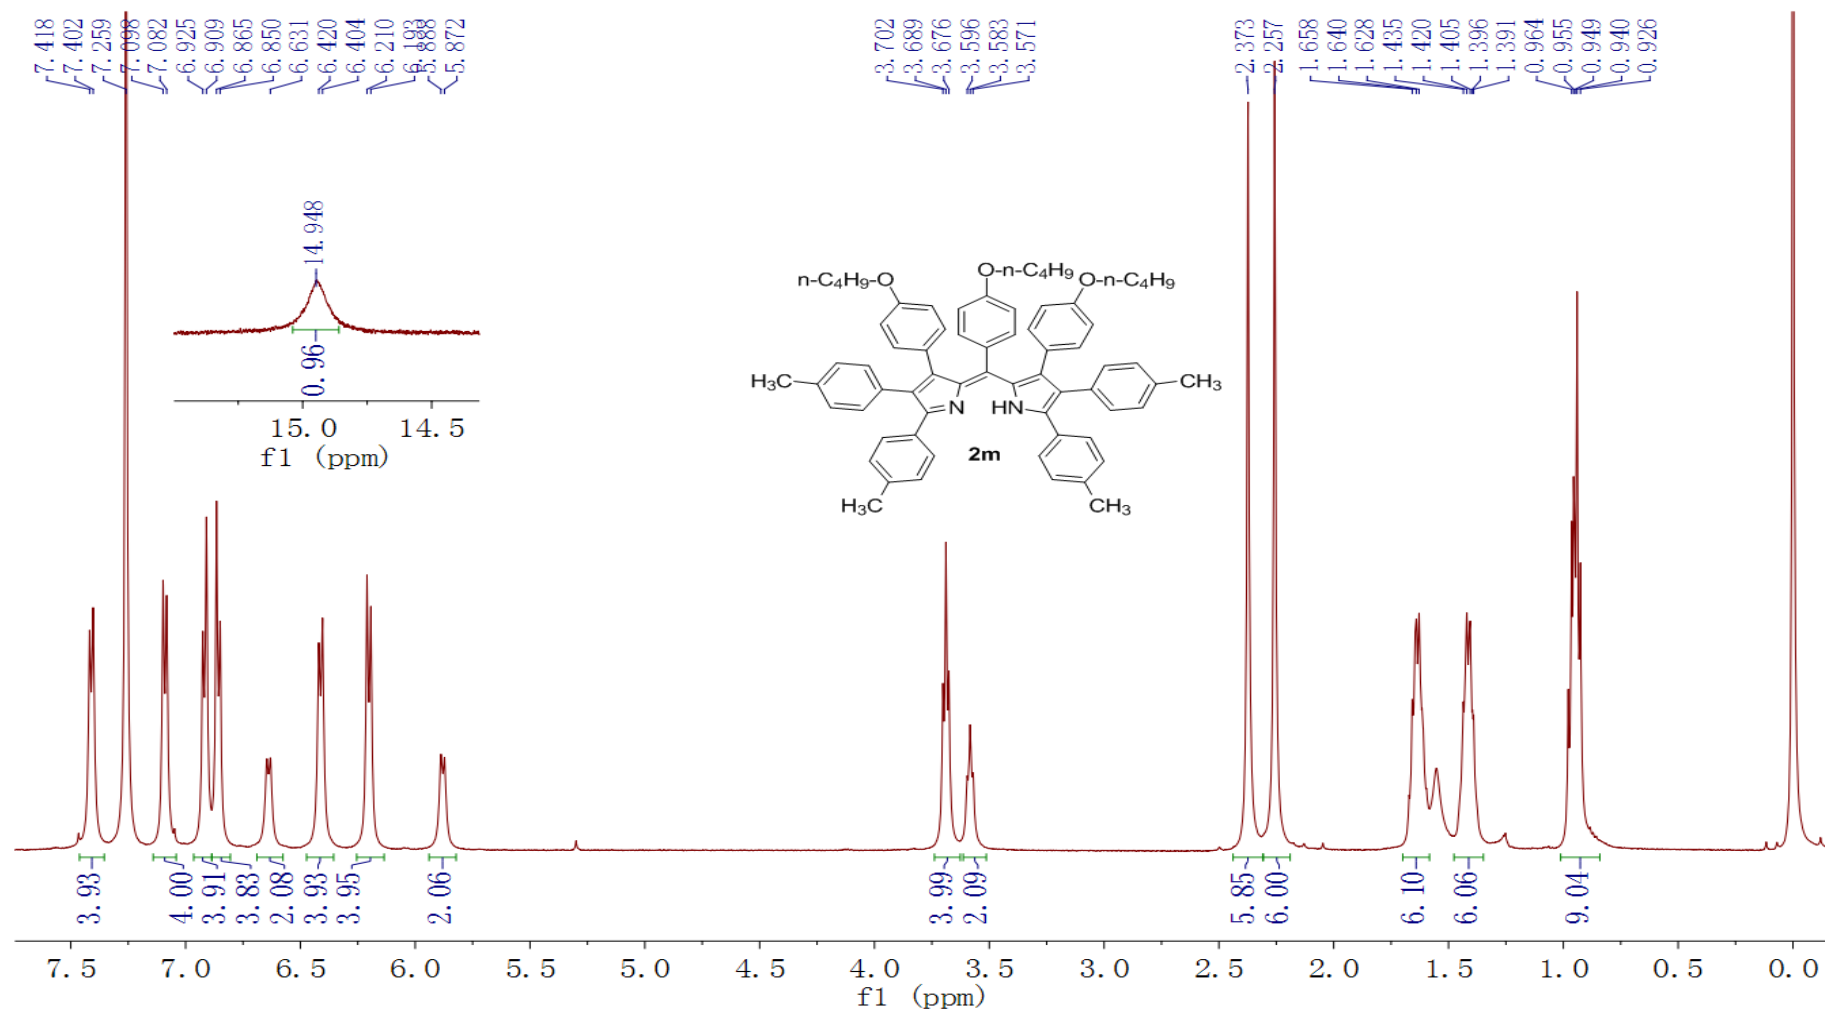

**Figure S49.** The  $^1\text{H}$  NMR spectra of **2m**.

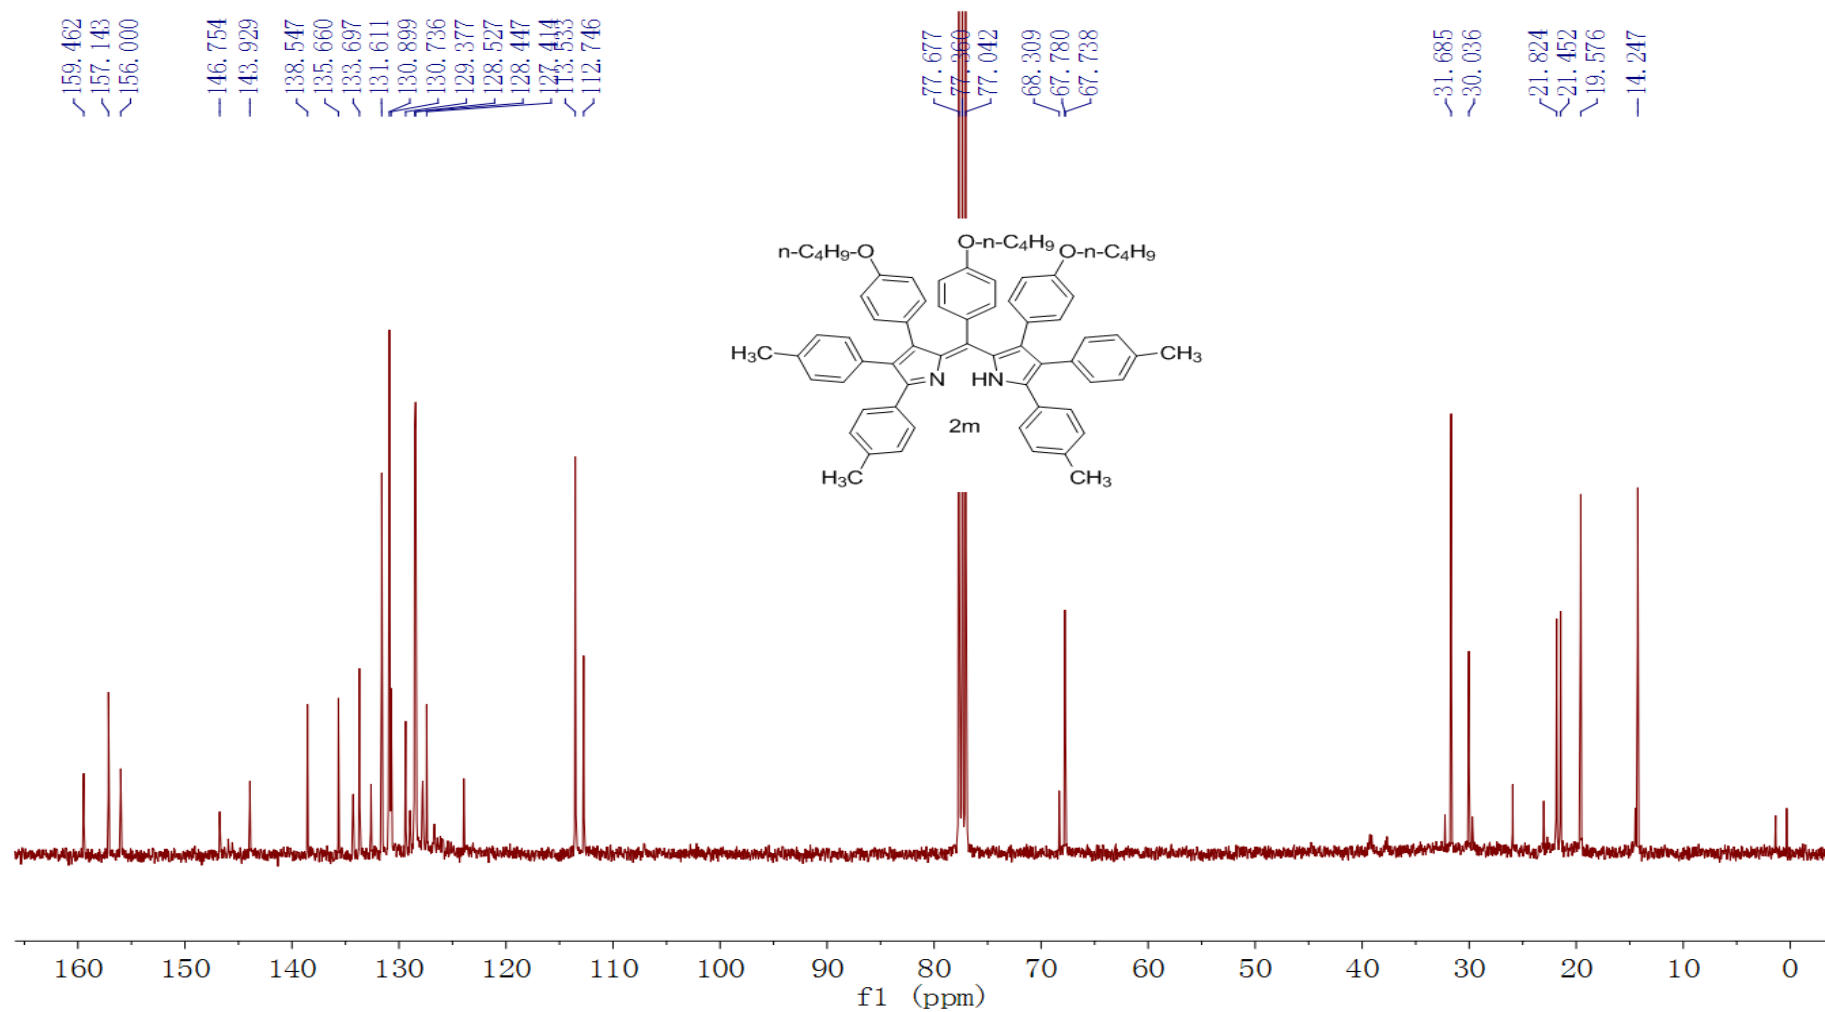



4. GC-MS for eliminated aromatic aldehydes

Figure S50. The GC-MS for eliminated benzaldehyde in the preparation of 2a.

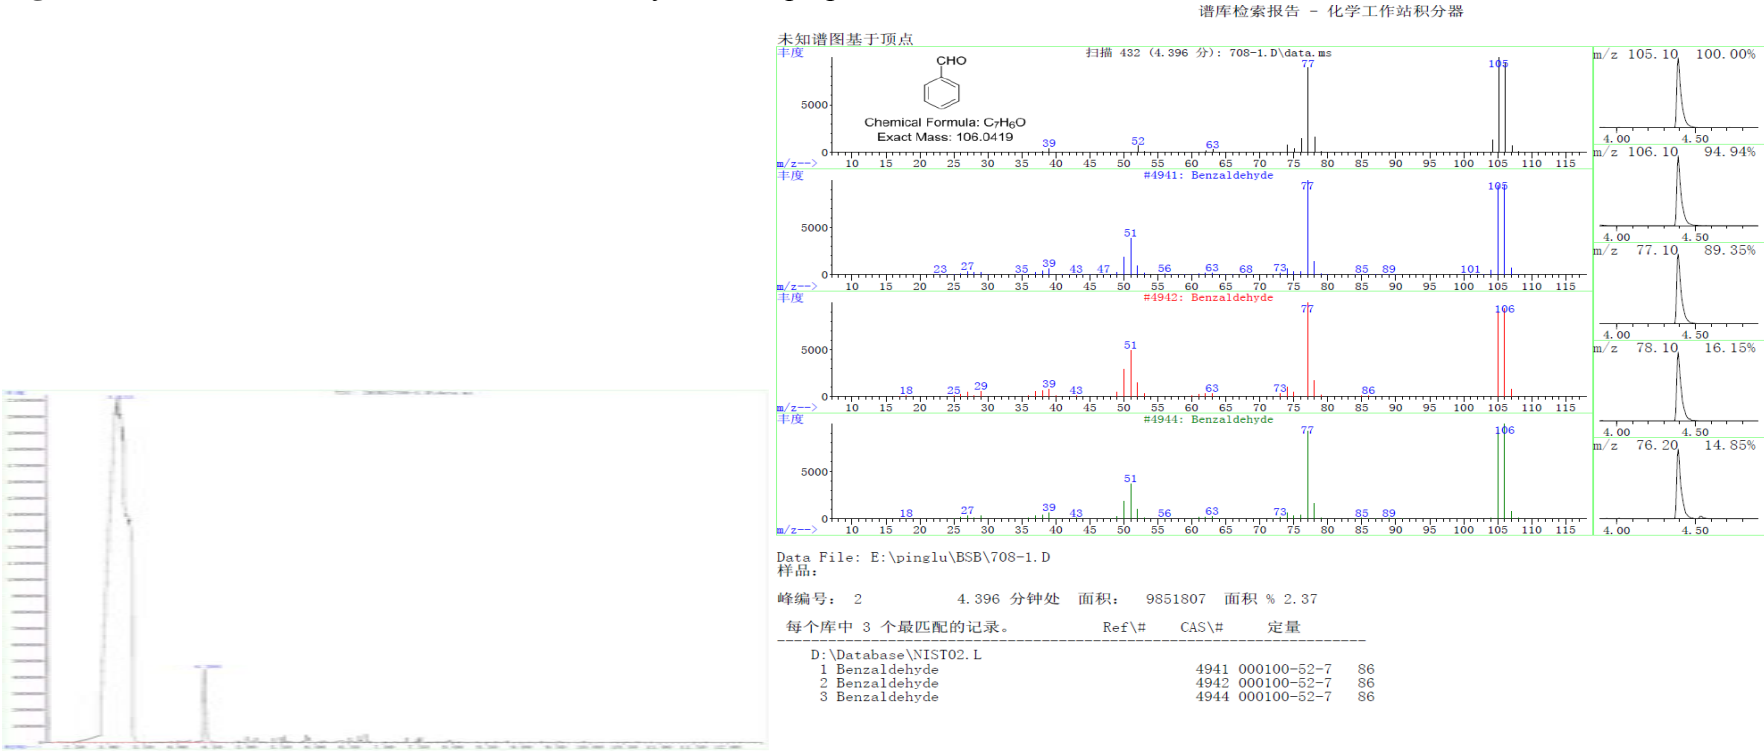

Figure S51. The GC-MS for eliminated 4-butylbenzaldehyde in the preparation of **2b**

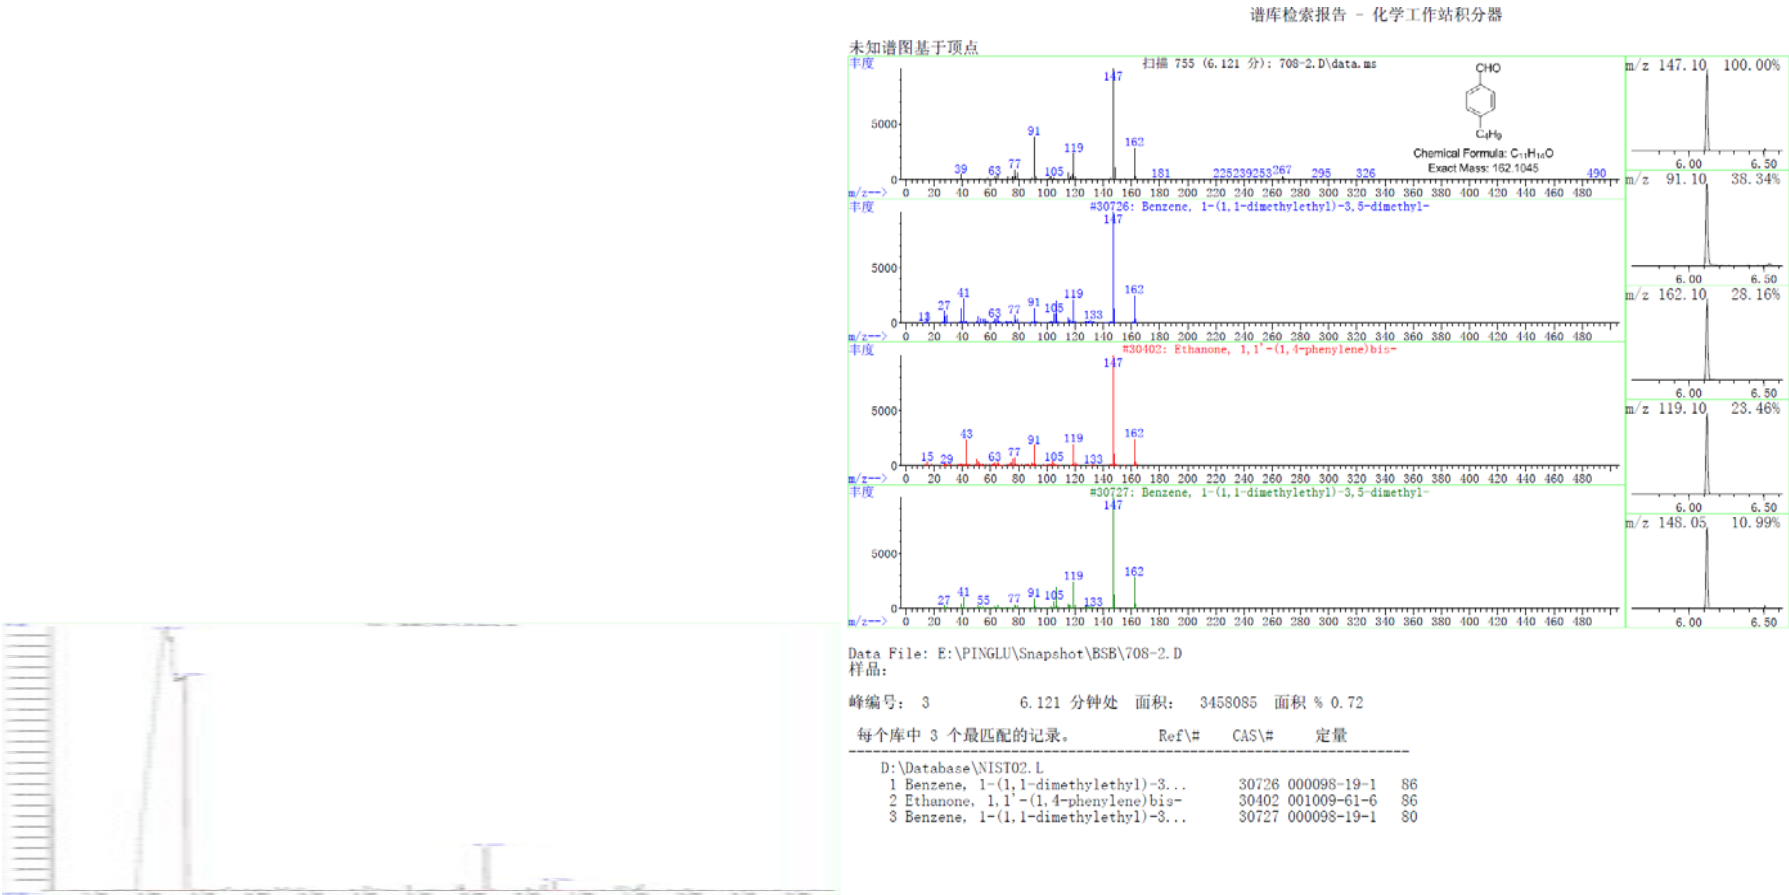

## 5. $^1\text{H}$ NMR and $^{13}\text{C}$ NMR spectra of **3a-3p**

**Figure S52.** The  $^1\text{H}$  NMR spectra of **3a**.

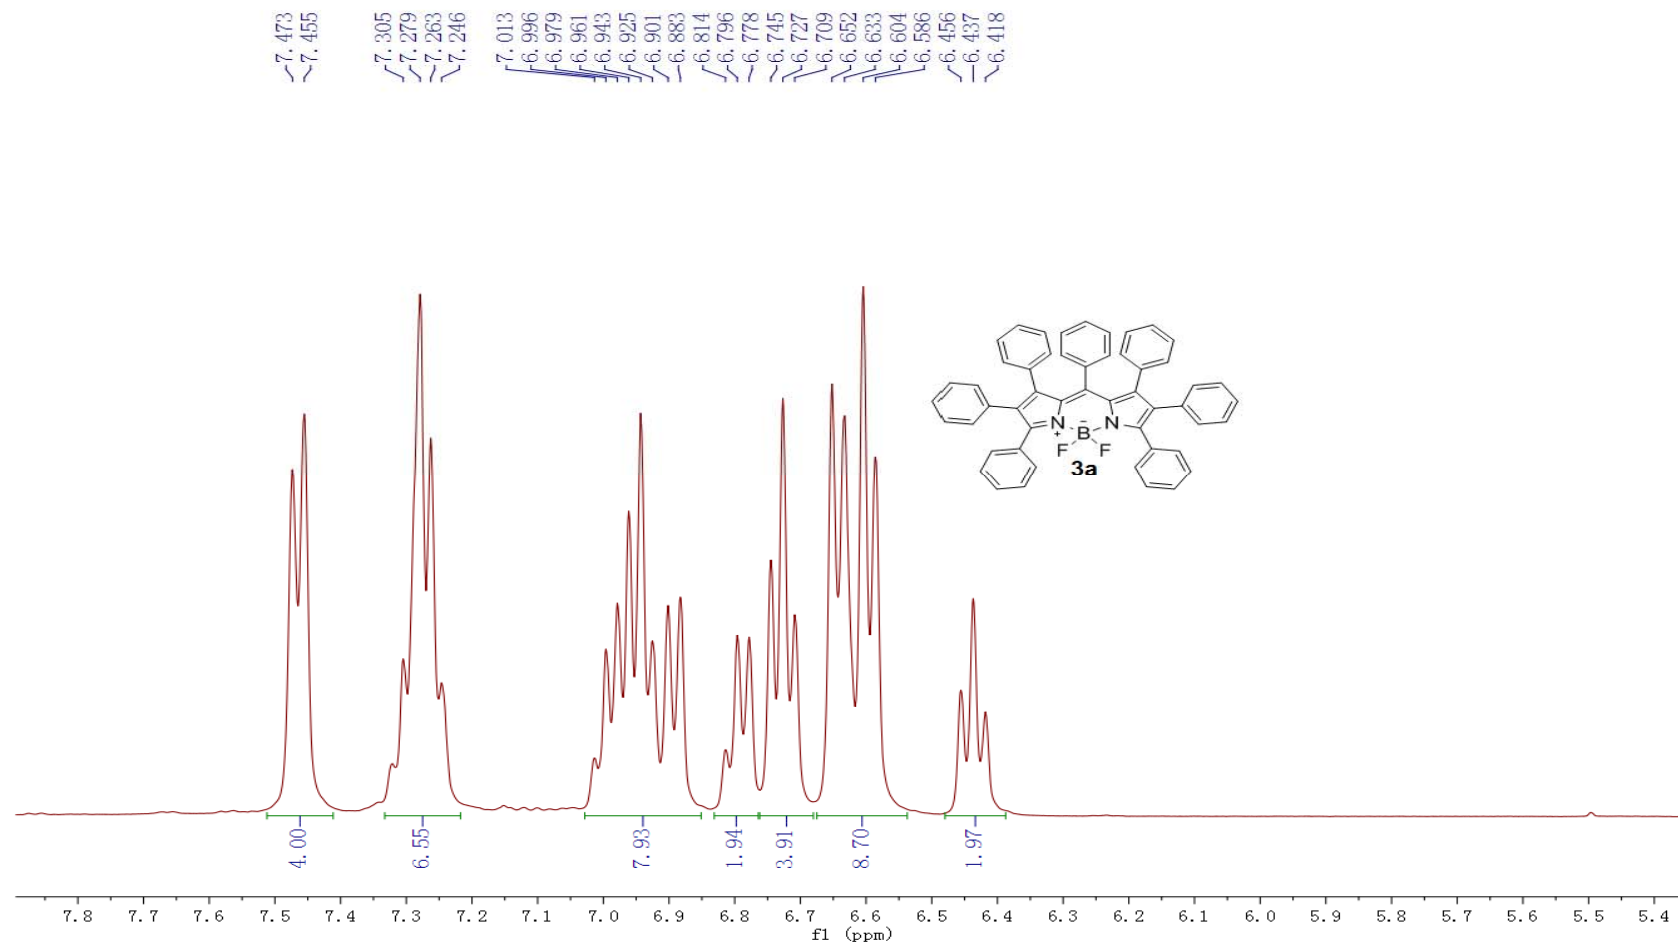

**Figure S53.** The  $^{13}\text{C}$  NMR spectra of **3a**.

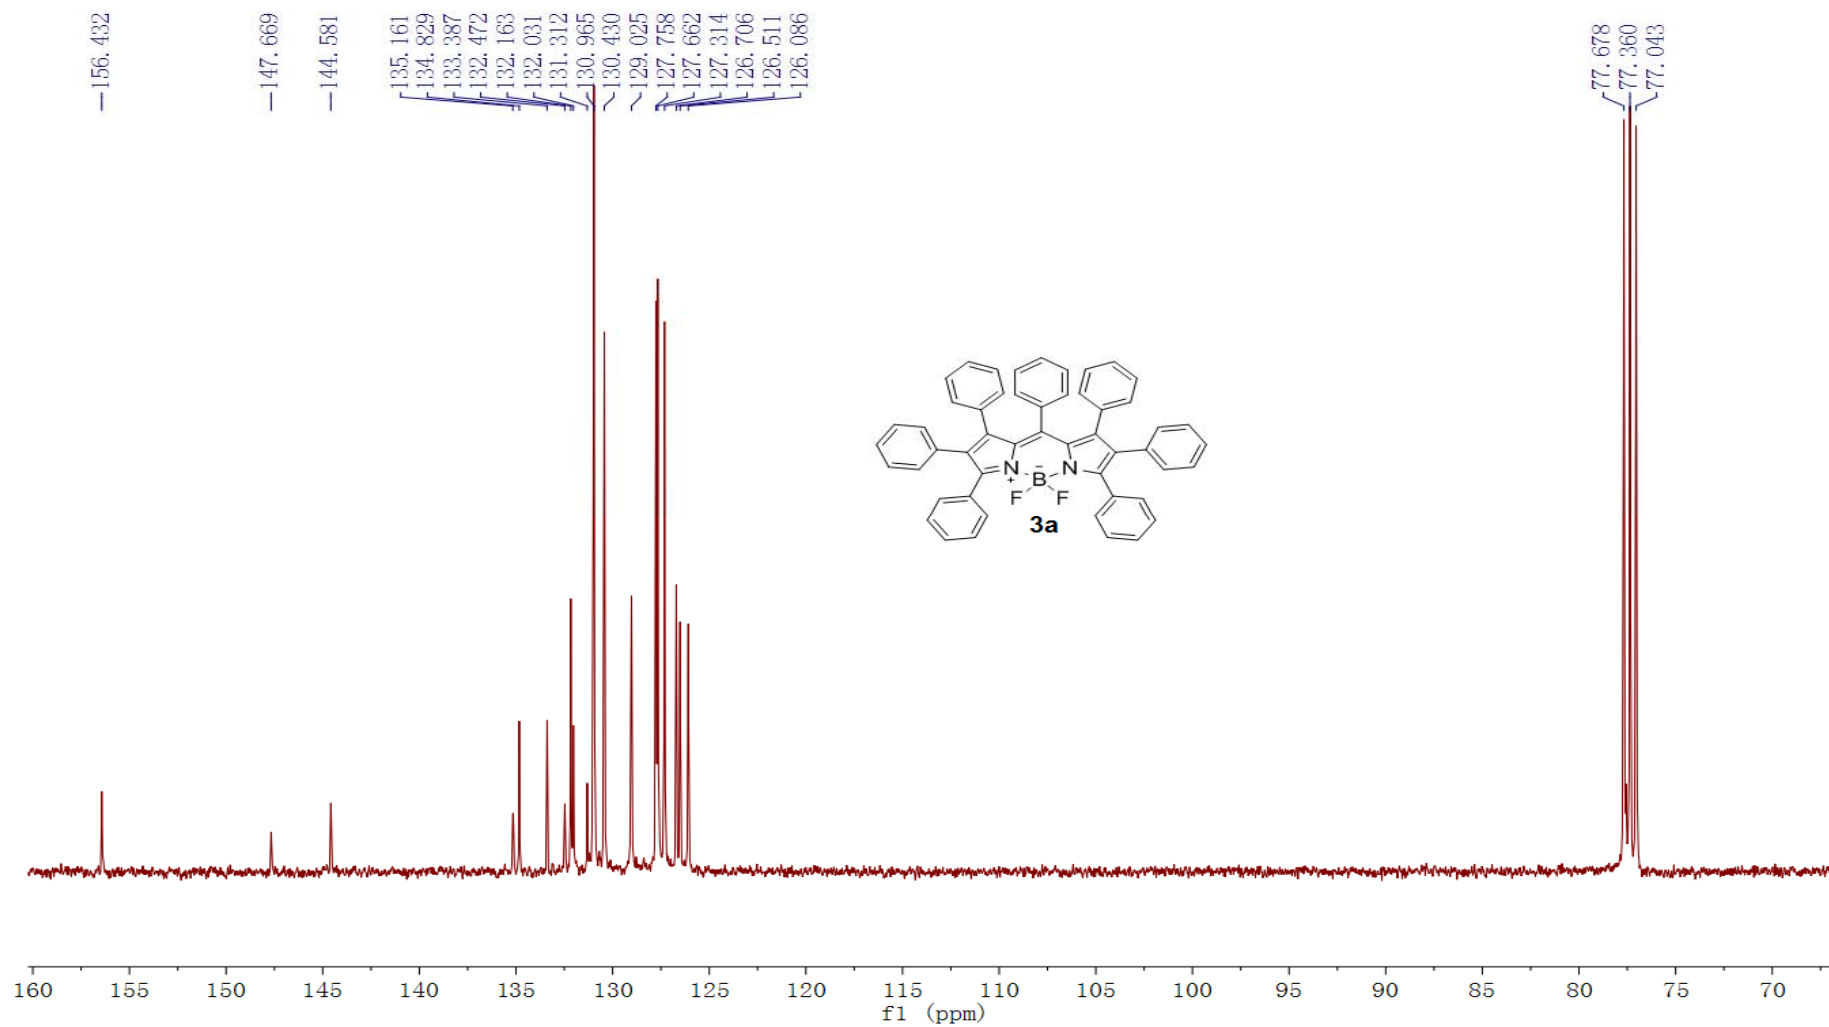

**Figure S54.** The  $^1\text{H}$  NMR spectra of **3b**.

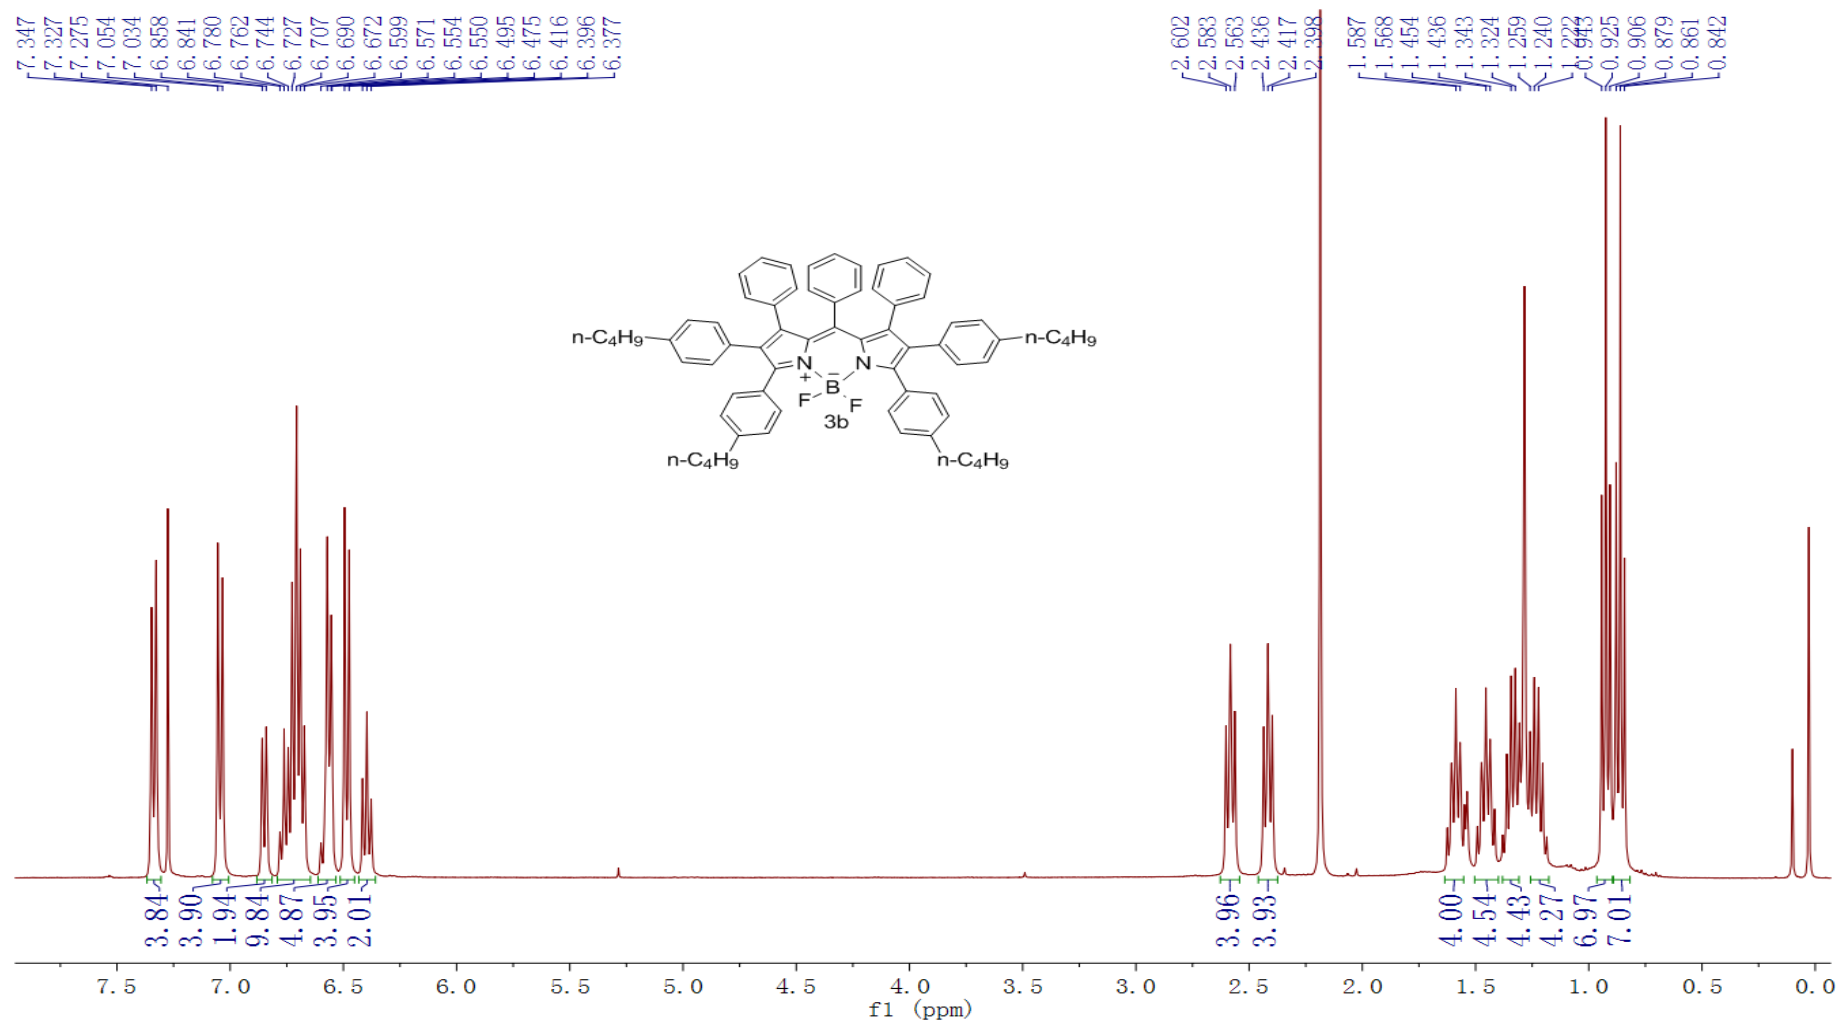

**Figure S55.** The  $^{13}\text{C}$  NMR spectra of **3b**.

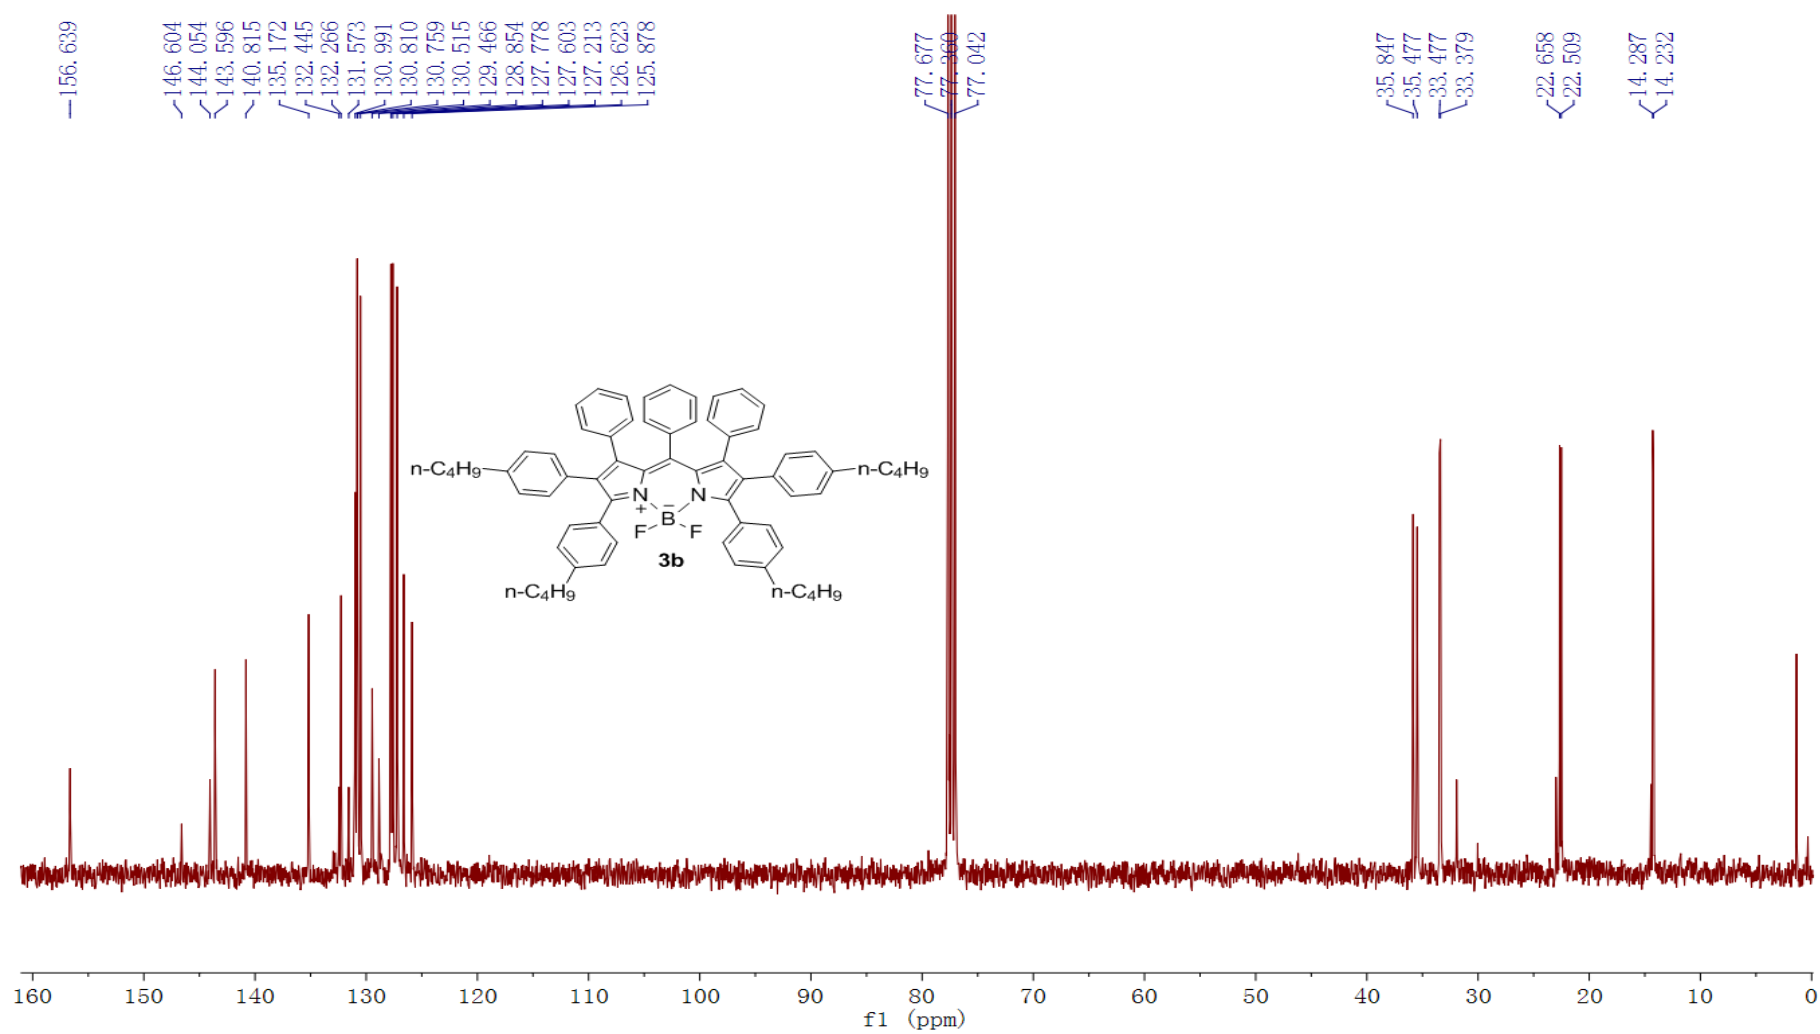

**Figure S56.** The  $^1\text{H}$  NMR spectra of **3c**.

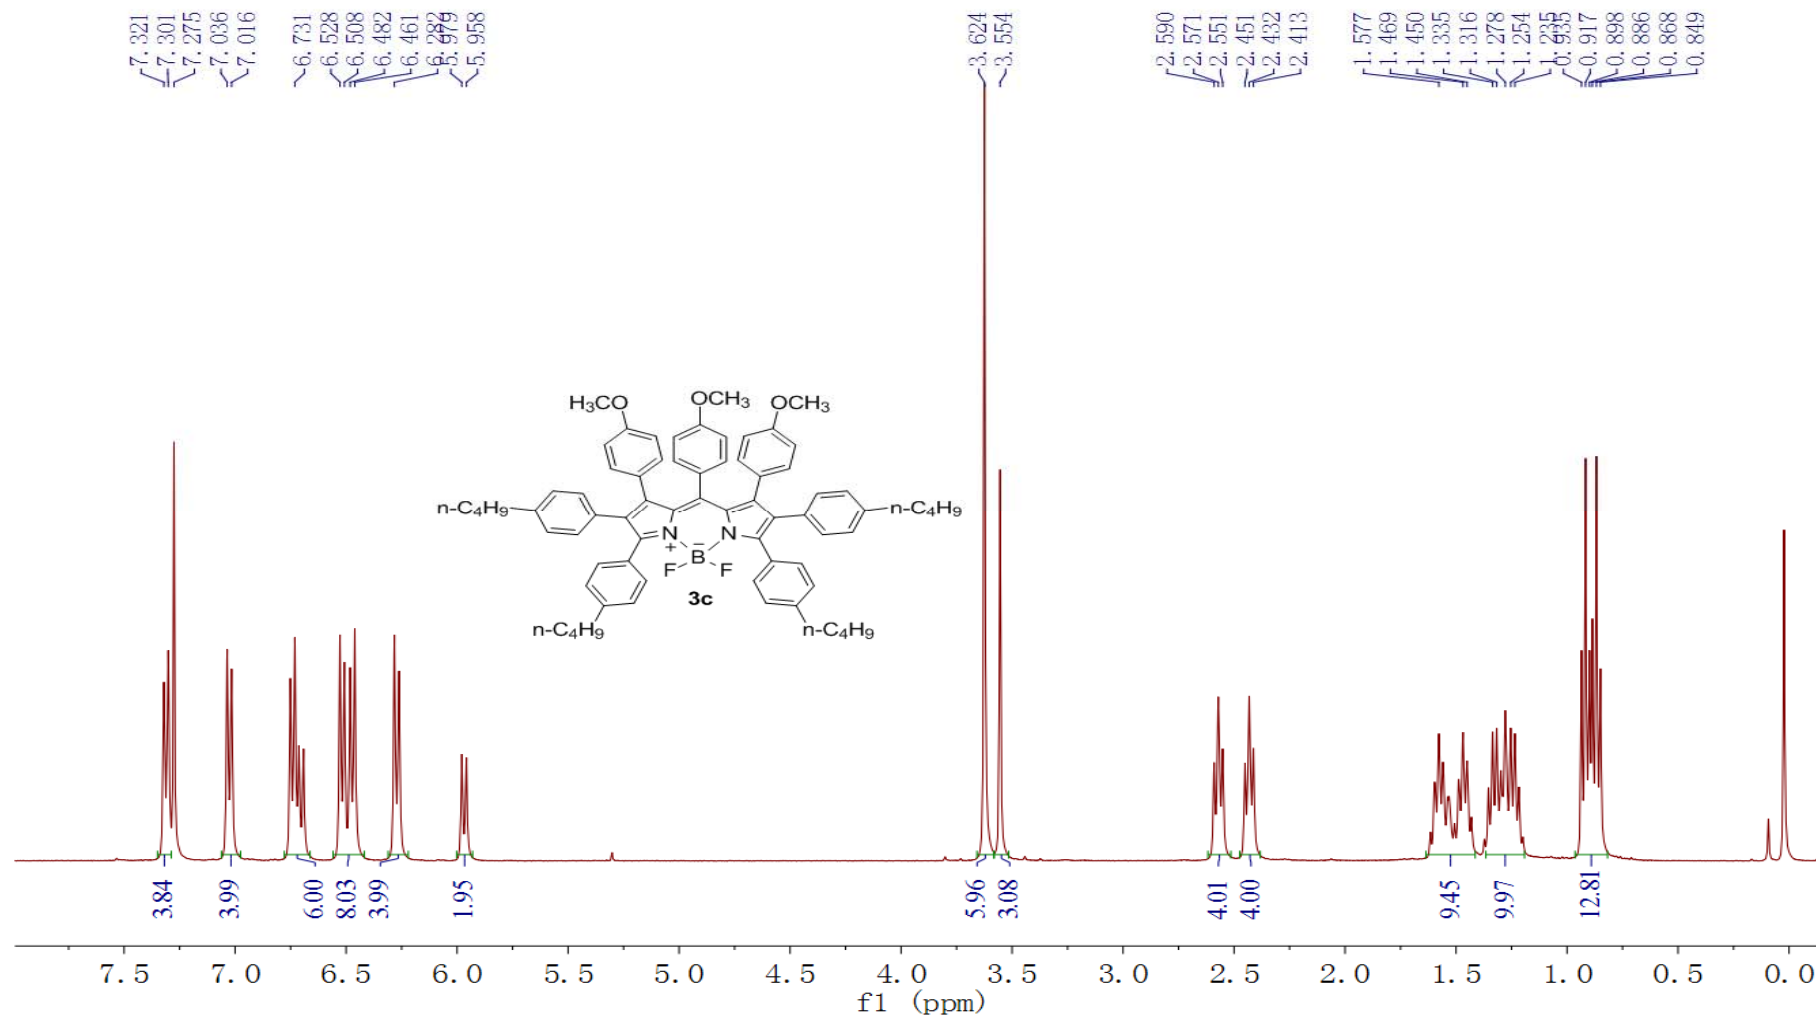

**Figure S57** The  $^{13}\text{C}$  NMR spectra of **3c**.

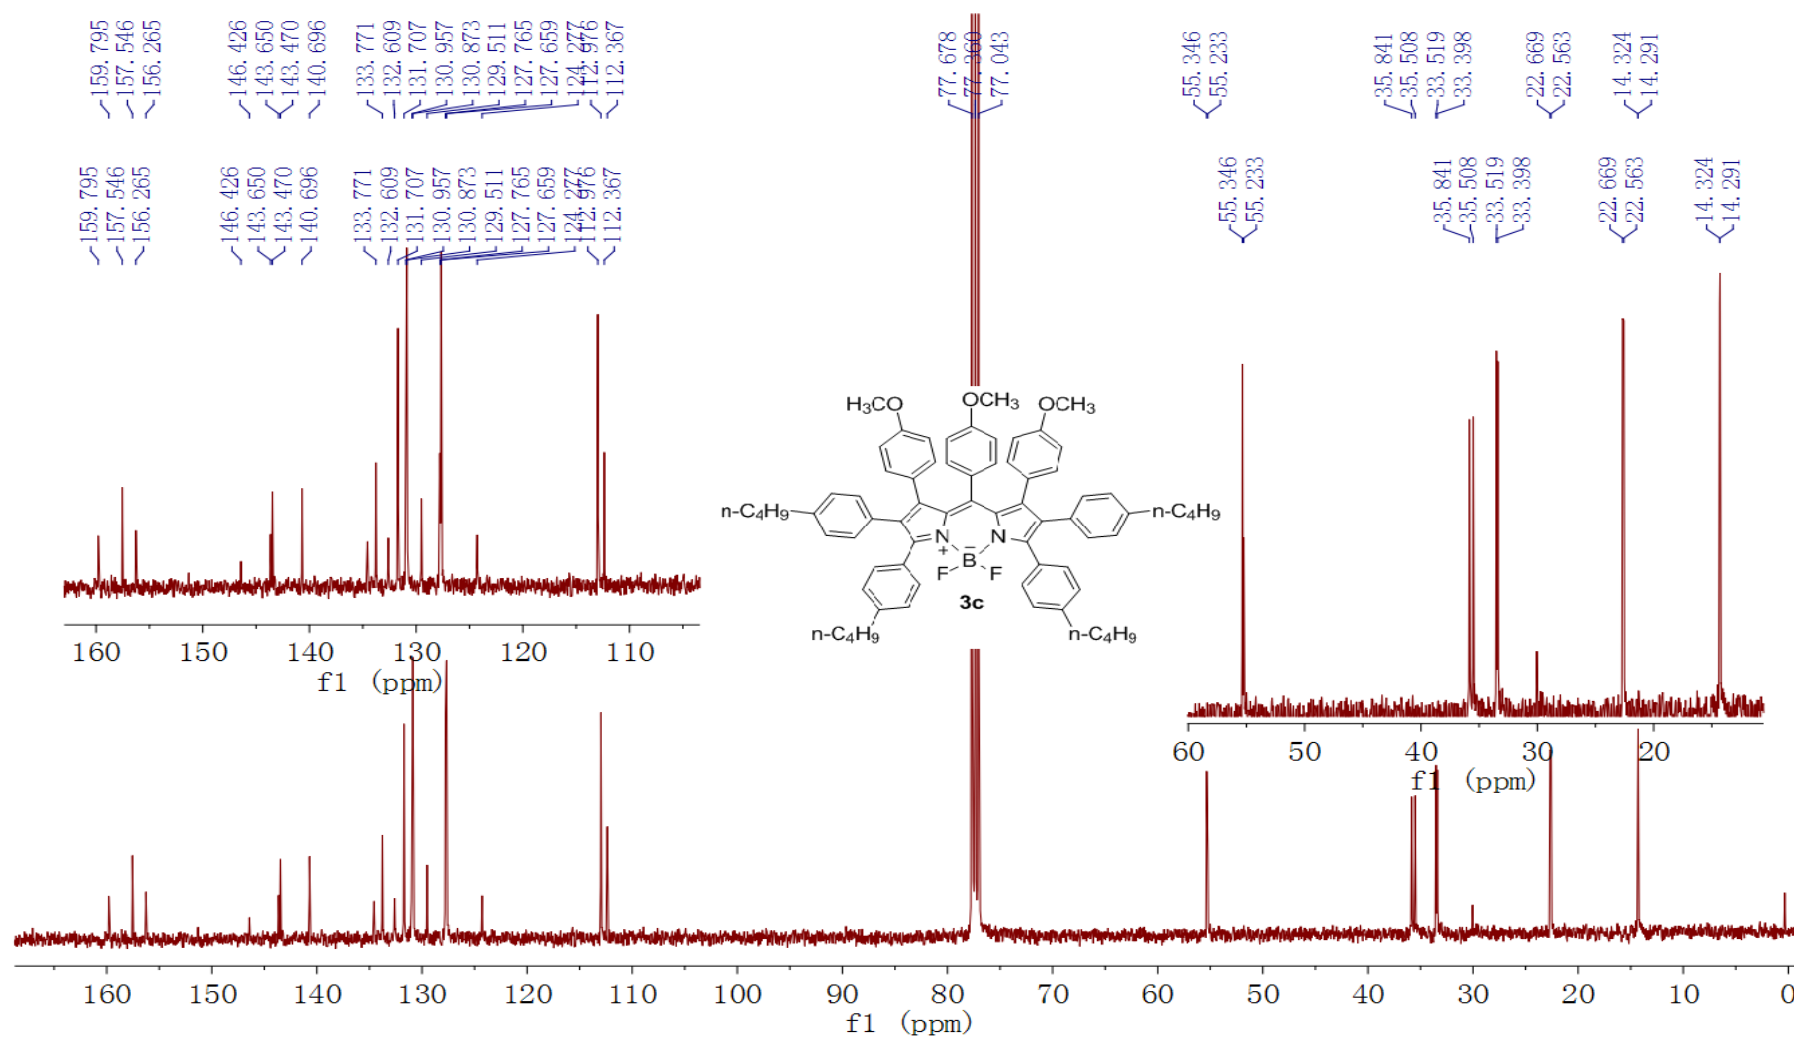



**Figure S58.** The  $^1\text{H}$  NMR spectra of **3d**.

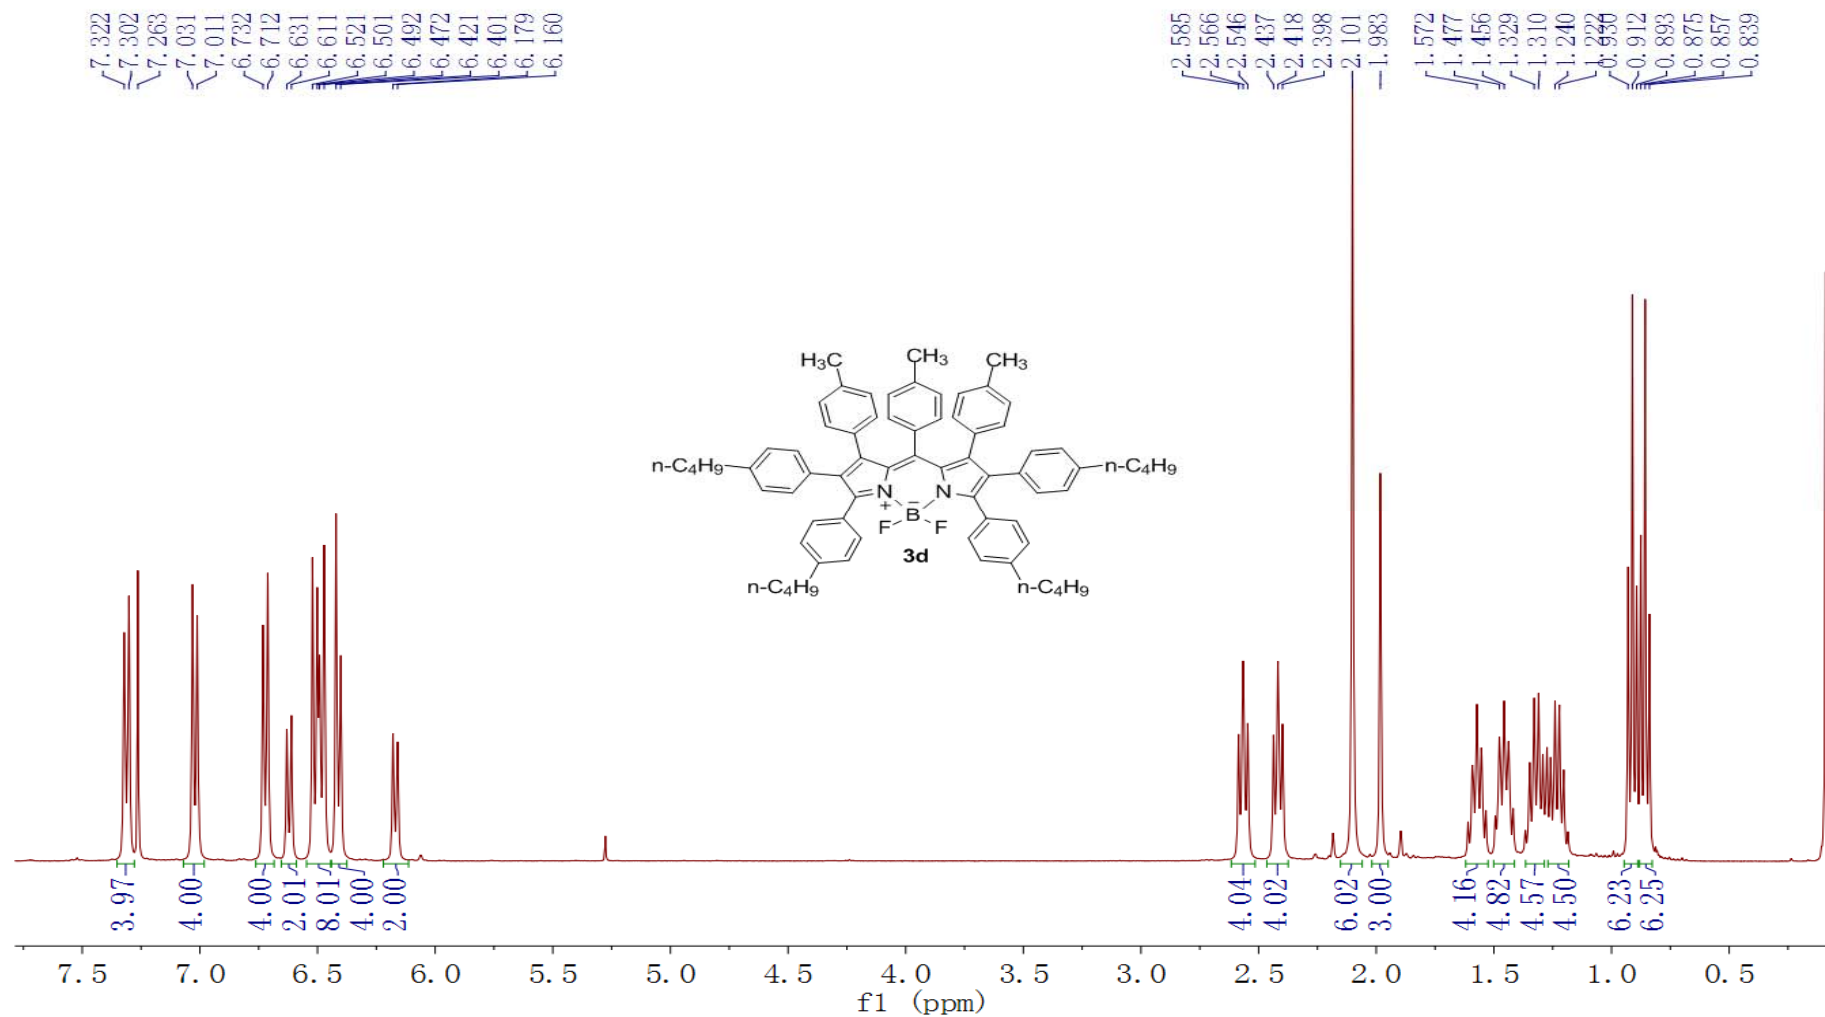

**Figure S59.** The  $^{13}\text{C}$  NMR spectra of **3d**.

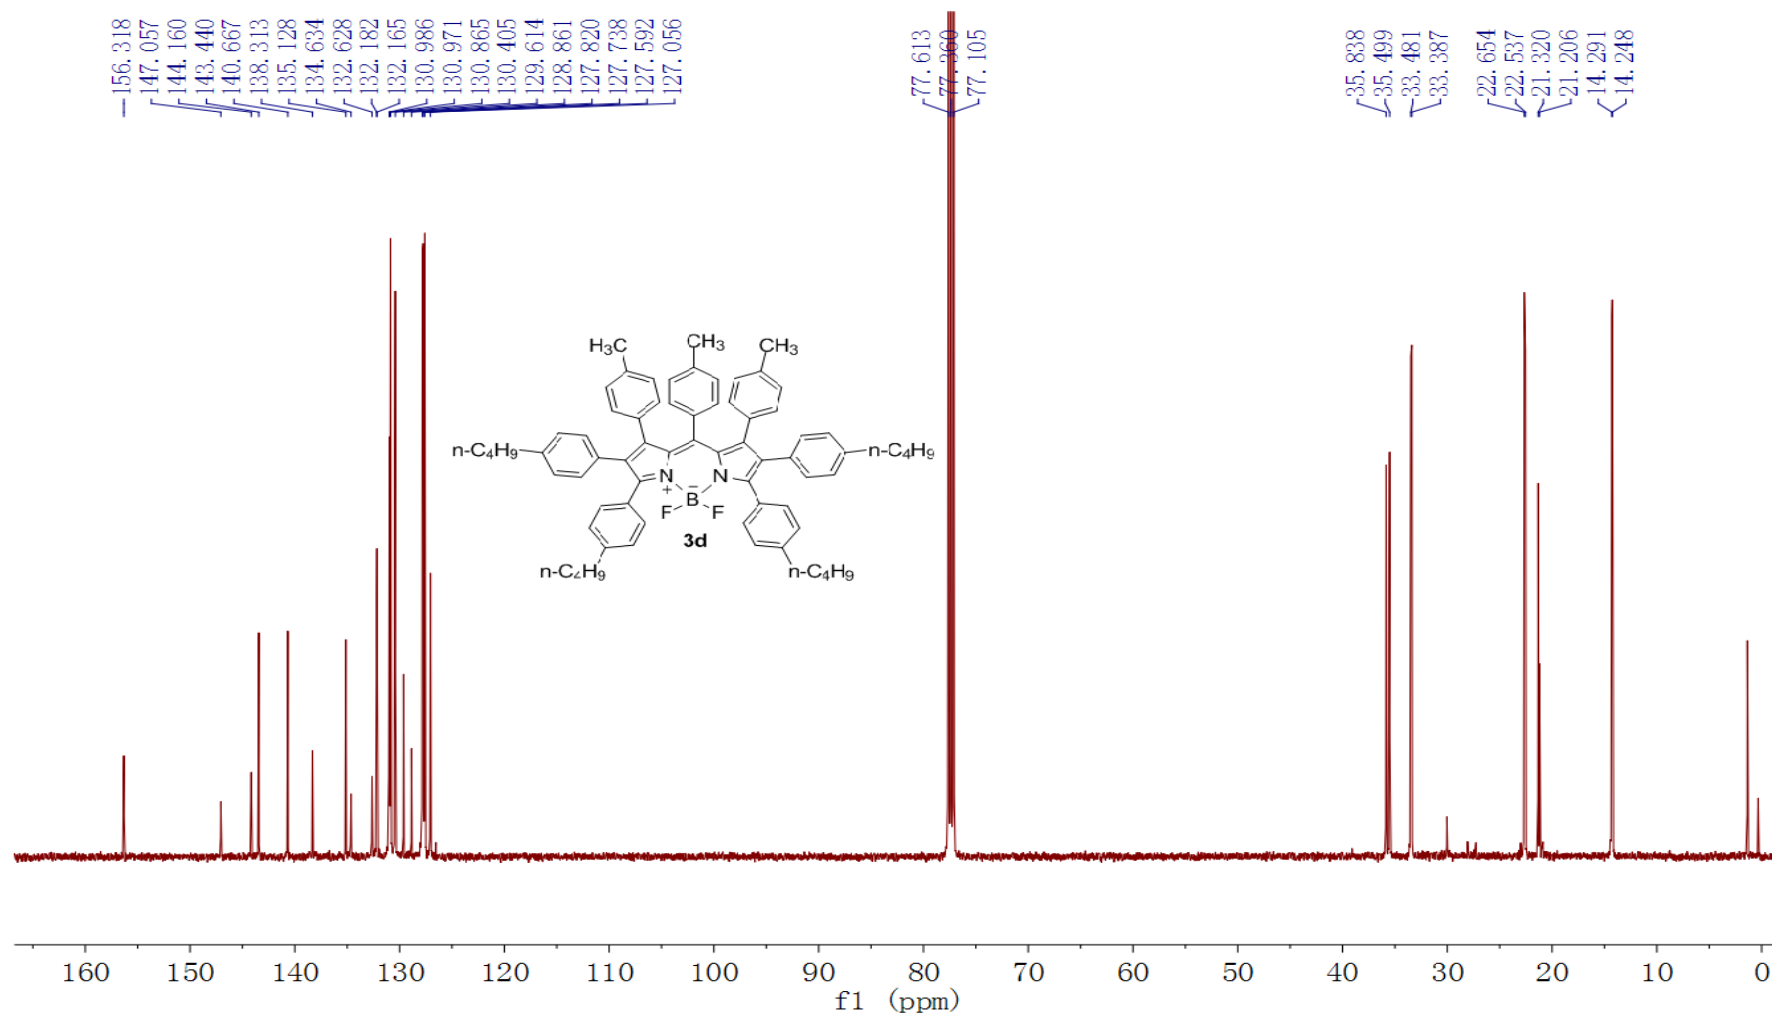

**Figure S60.** The  $^1\text{H}$  NMR spectra of **3e**.

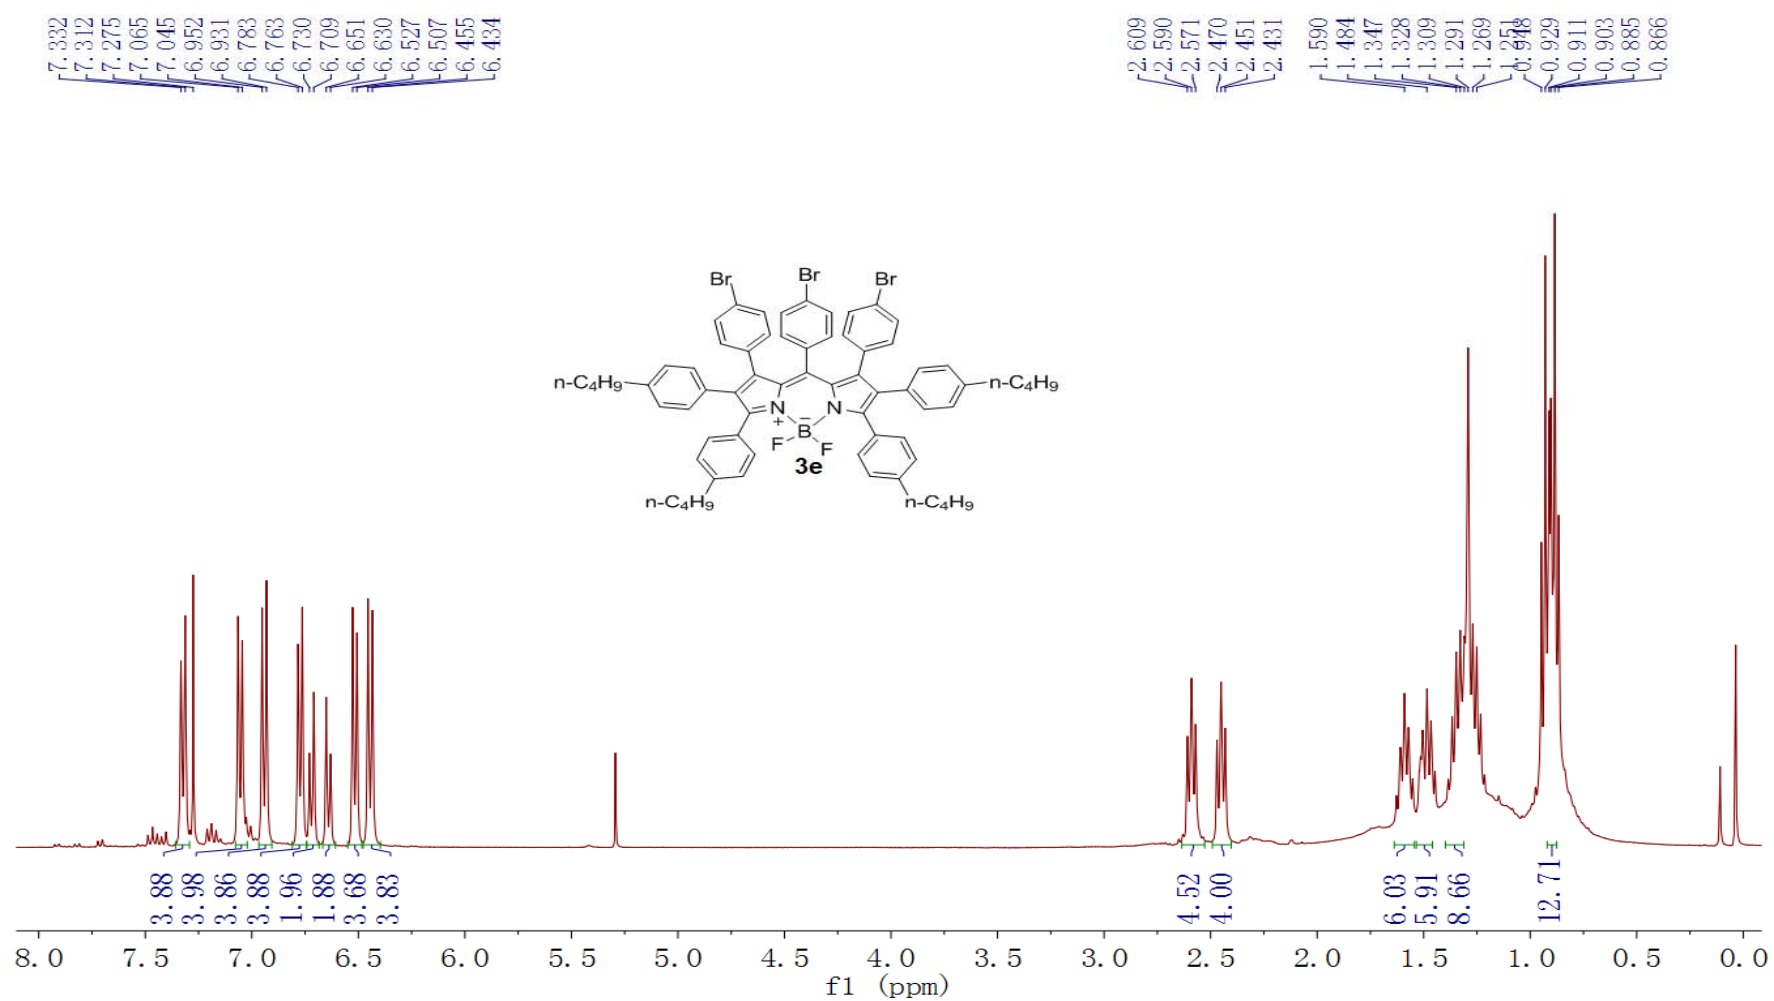

**Figure S61.** The  $^1\text{H}$  NMR spectra of **3f**.

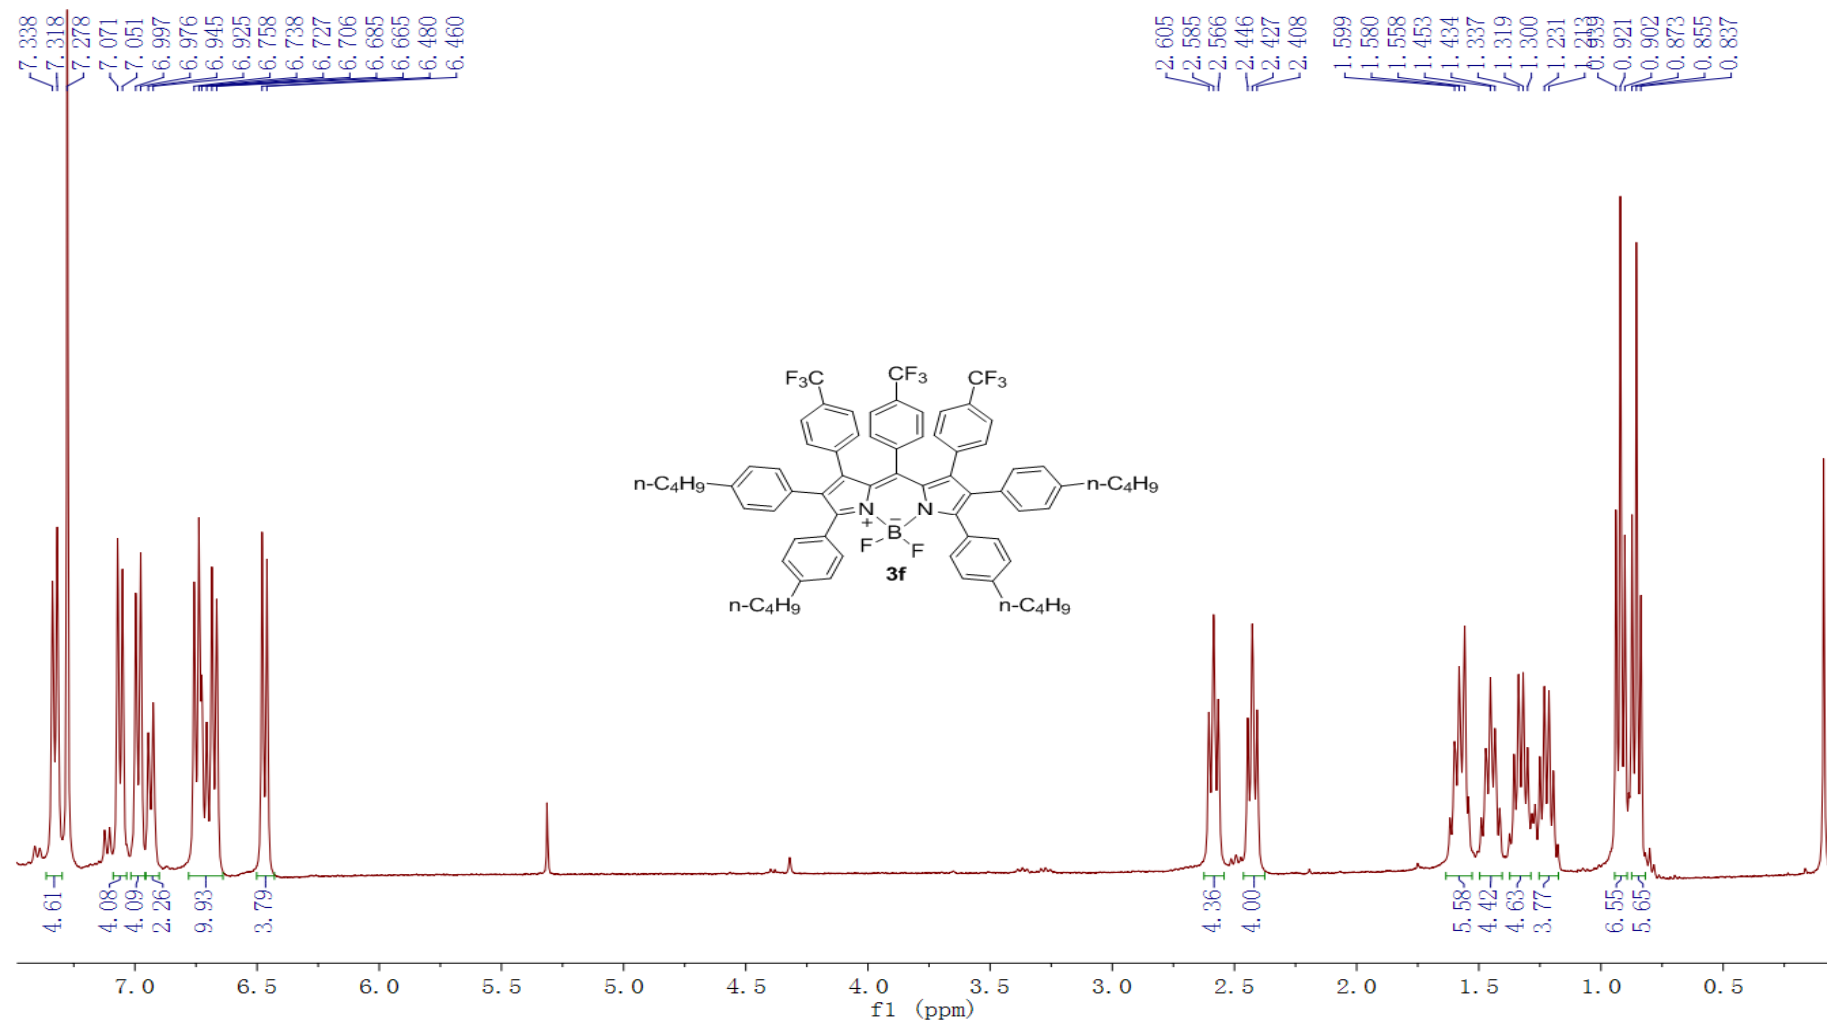

**Figure S62.** The  $^1\text{H}$  NMR spectra of **3g**.

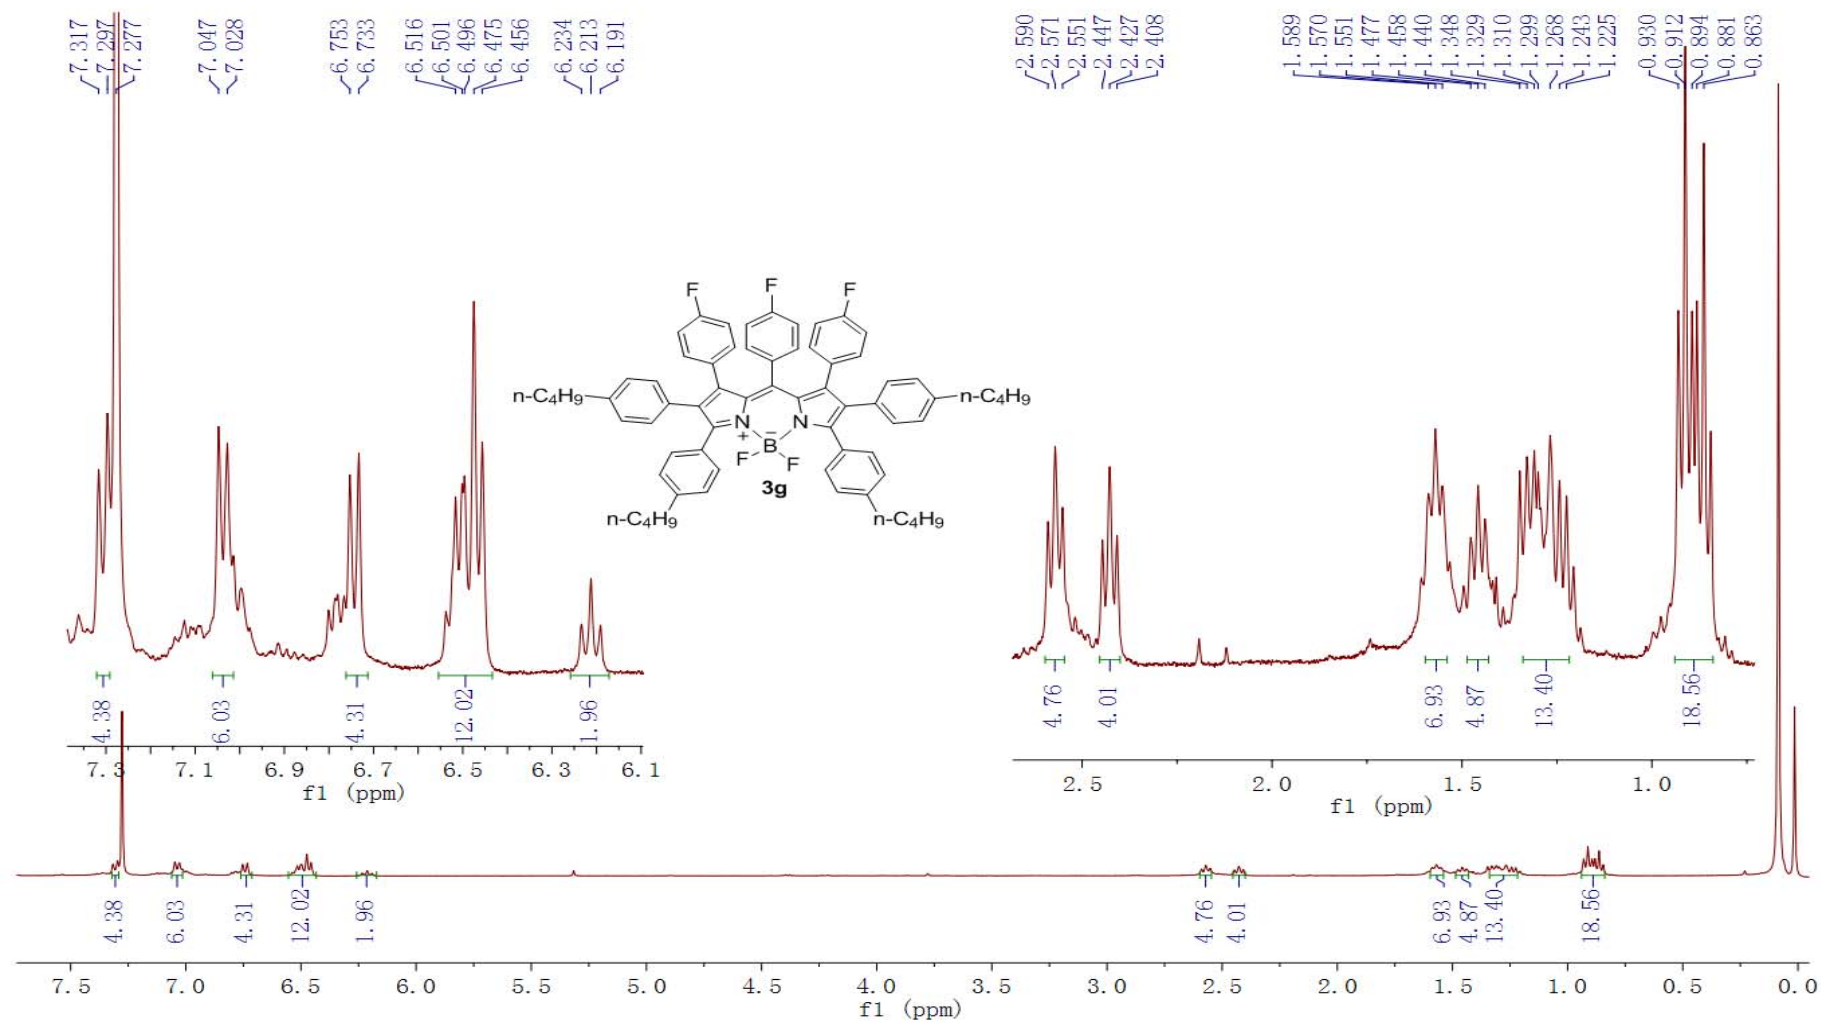

**Figure S63.** The  $^1\text{H}$  NMR spectra of **3h**.

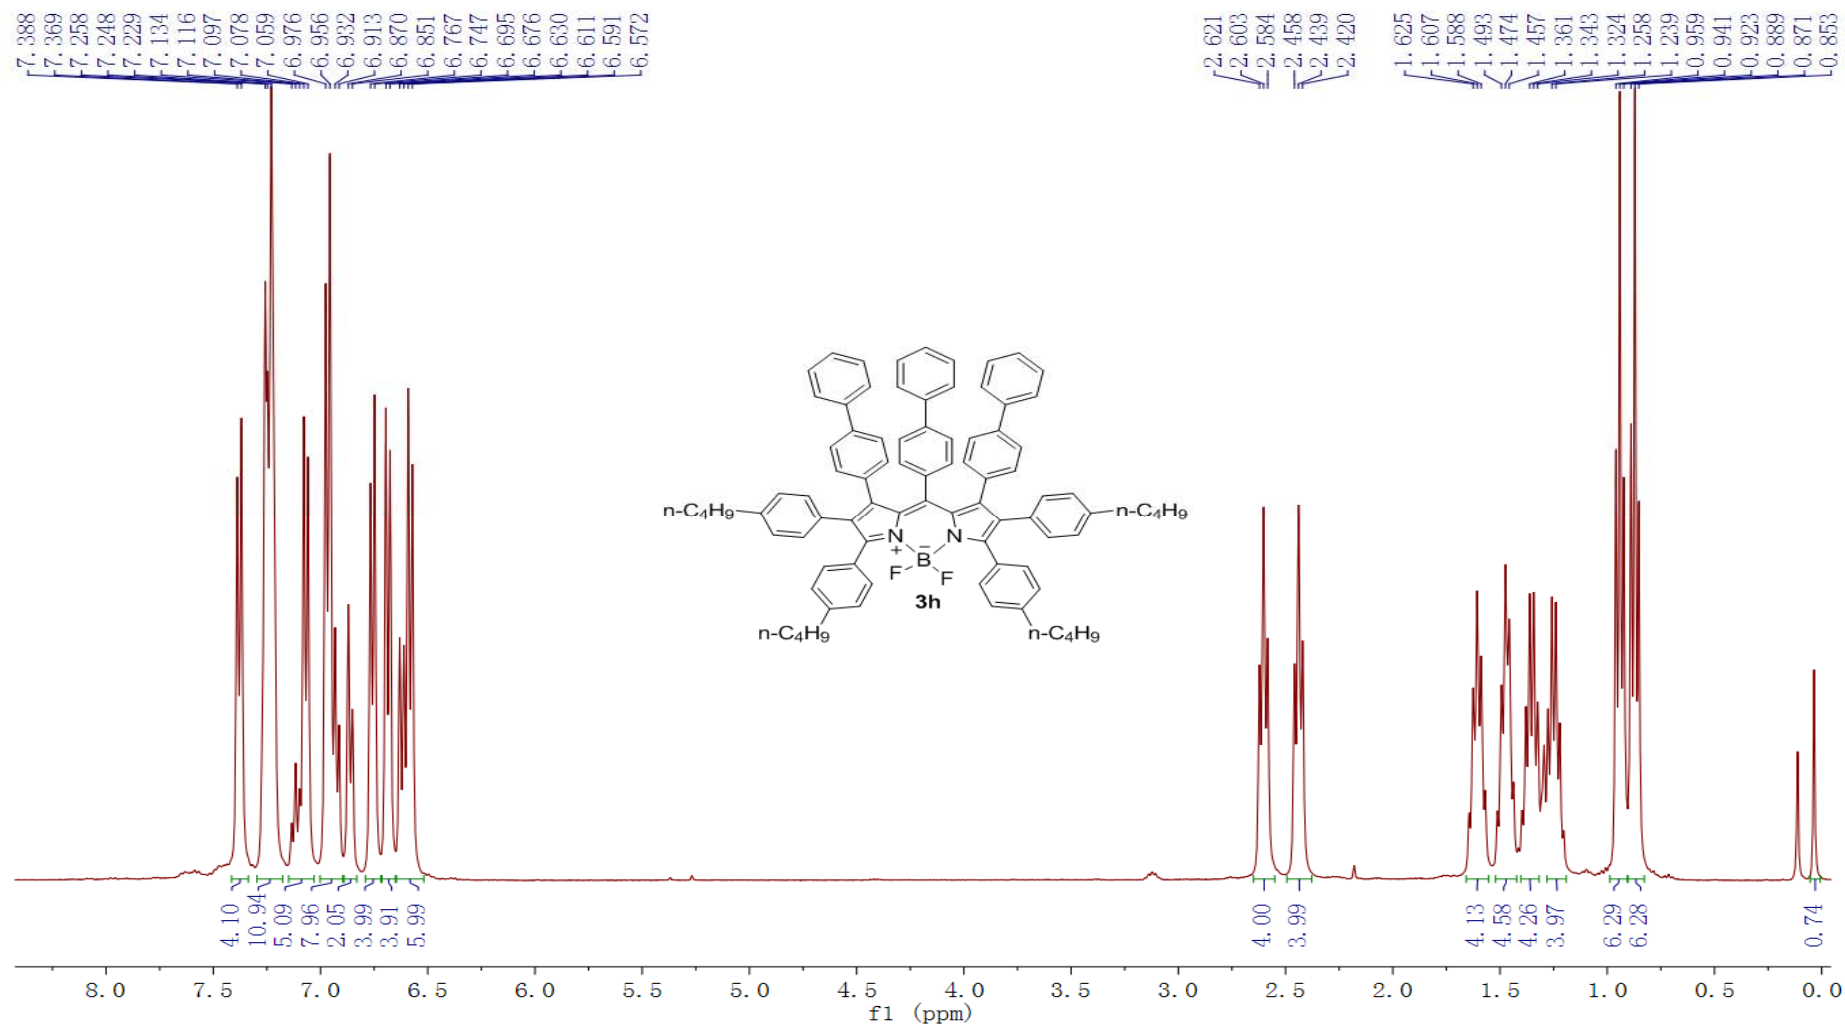

**Figure S64.** The  $^{13}\text{C}$  NMR spectra of **3h**.

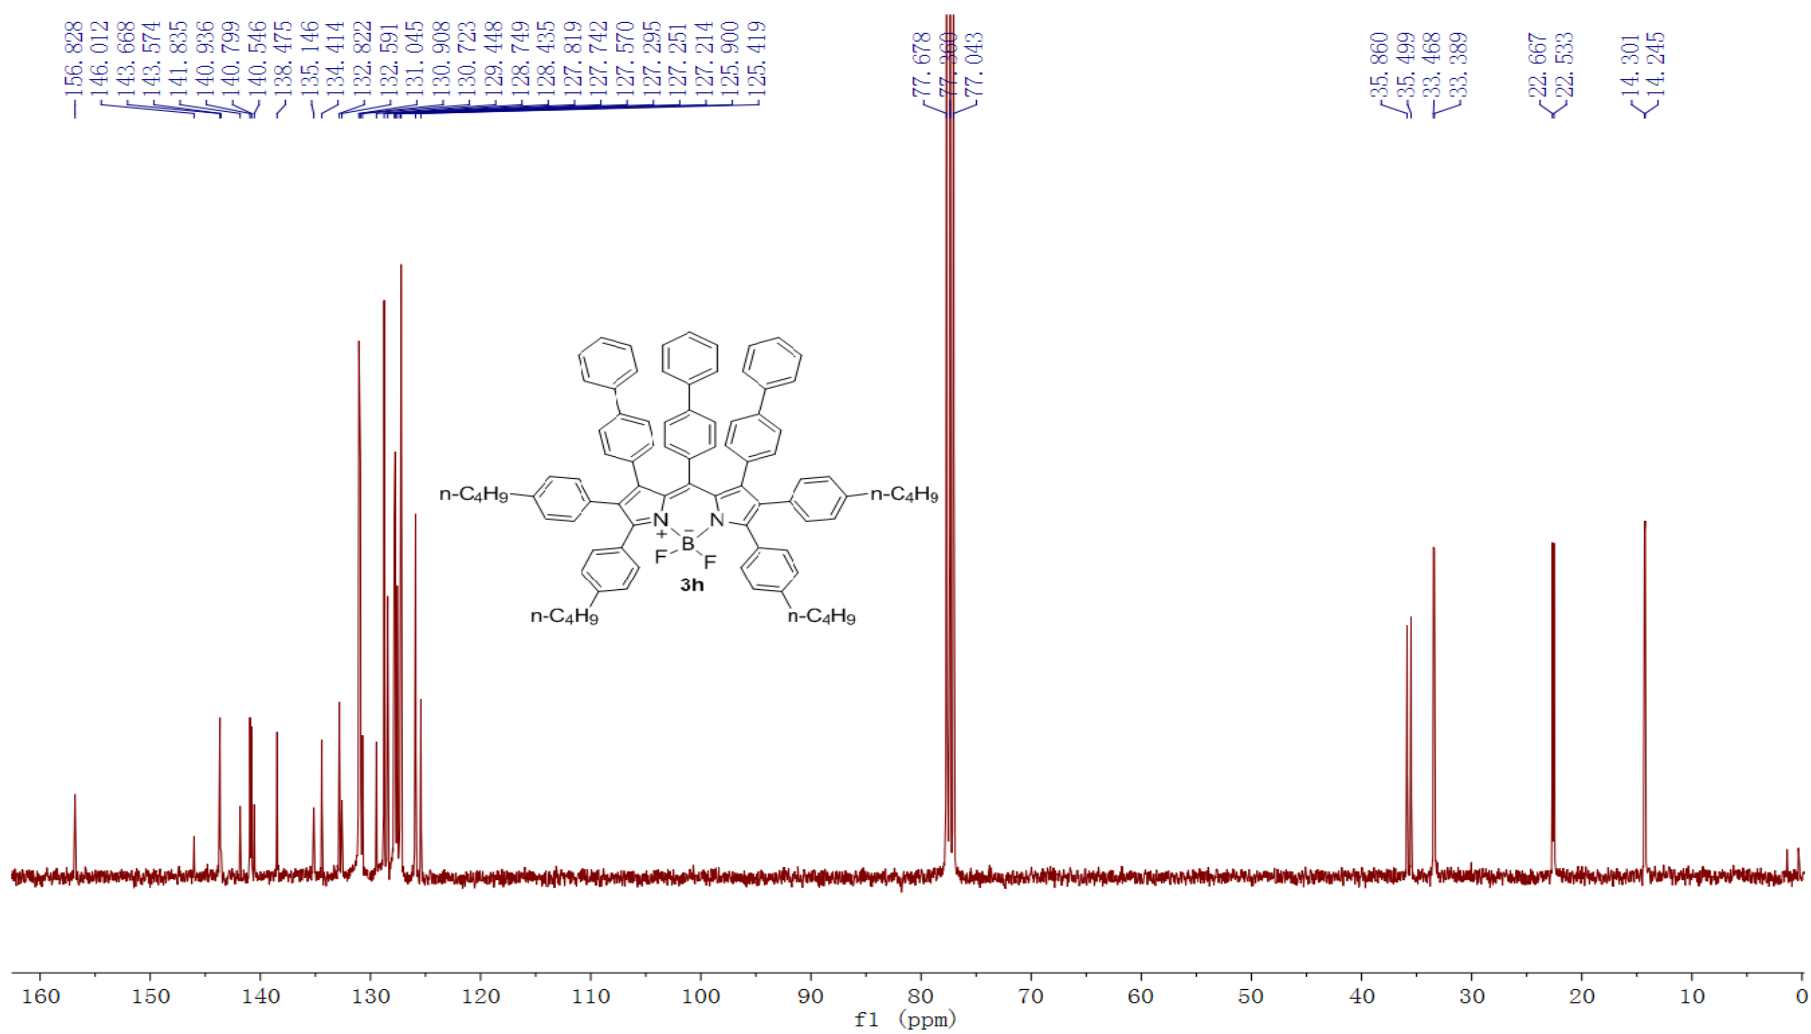

**Figure S65.** The  $^1\text{H}$  NMR spectra of **3i**.

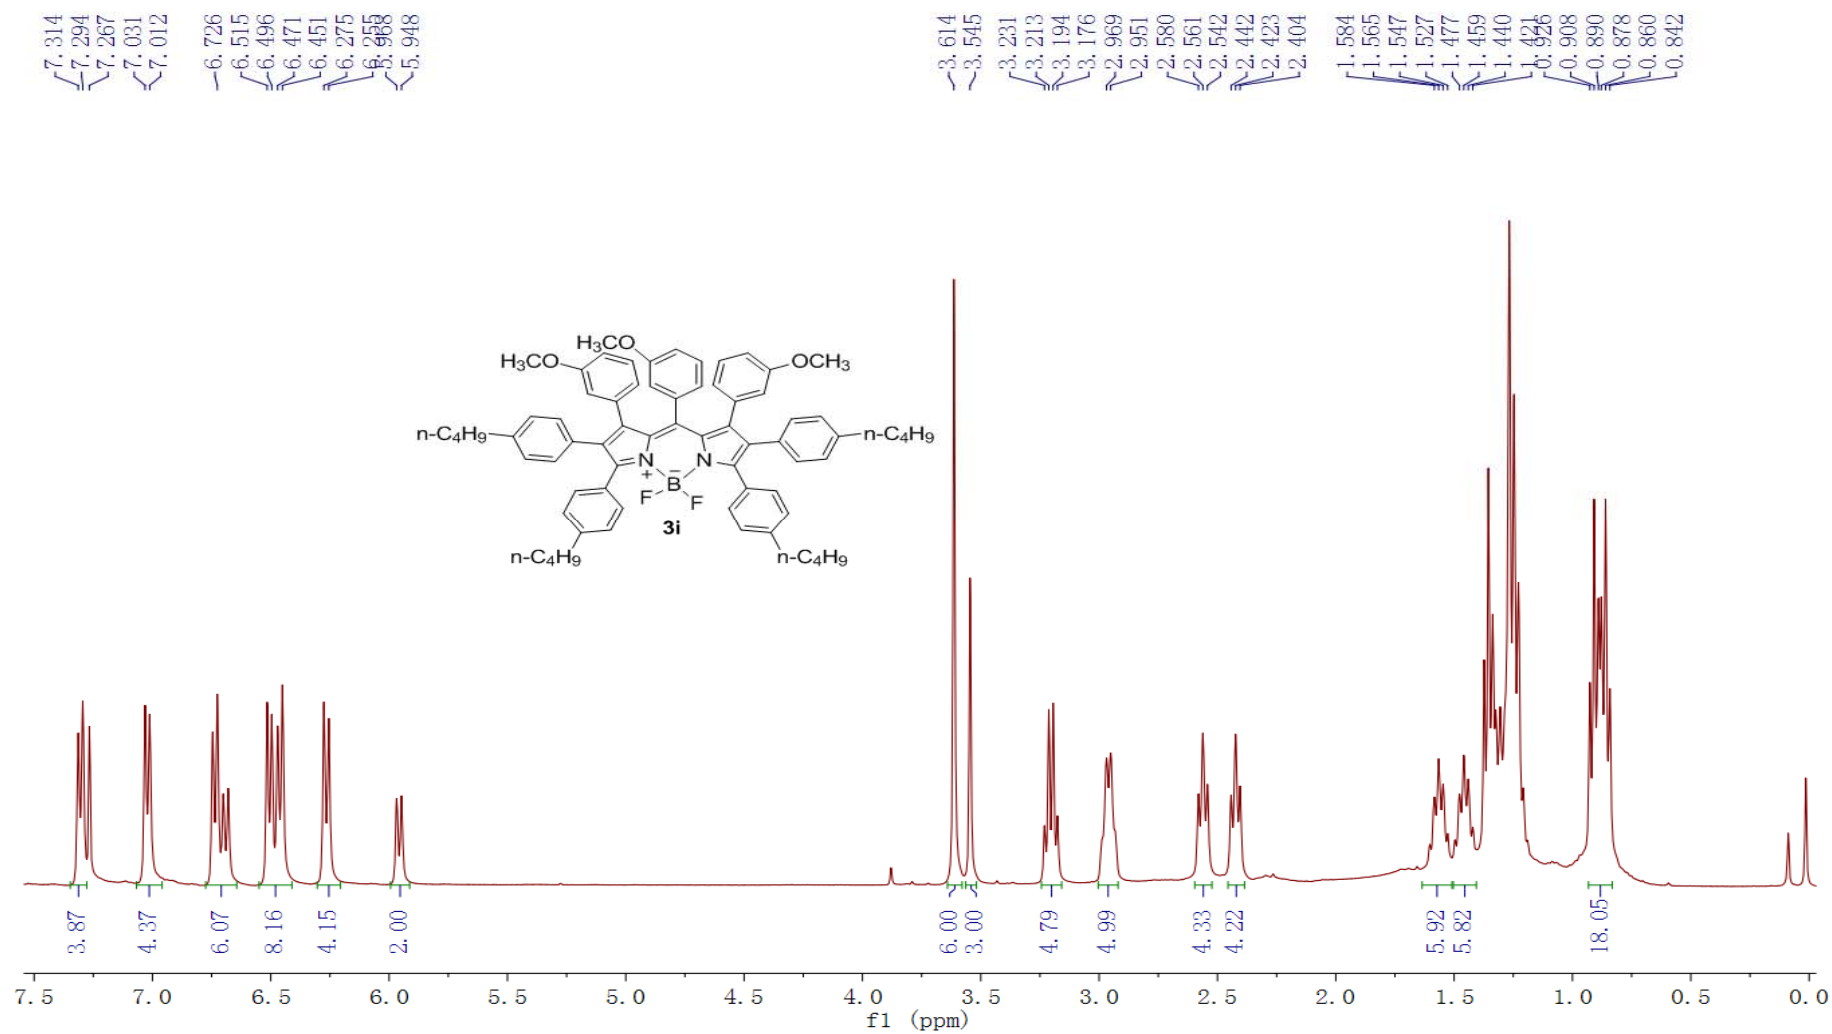



**Figure S66.** The  $^{13}\text{C}$  NMR spectra of **3i**.

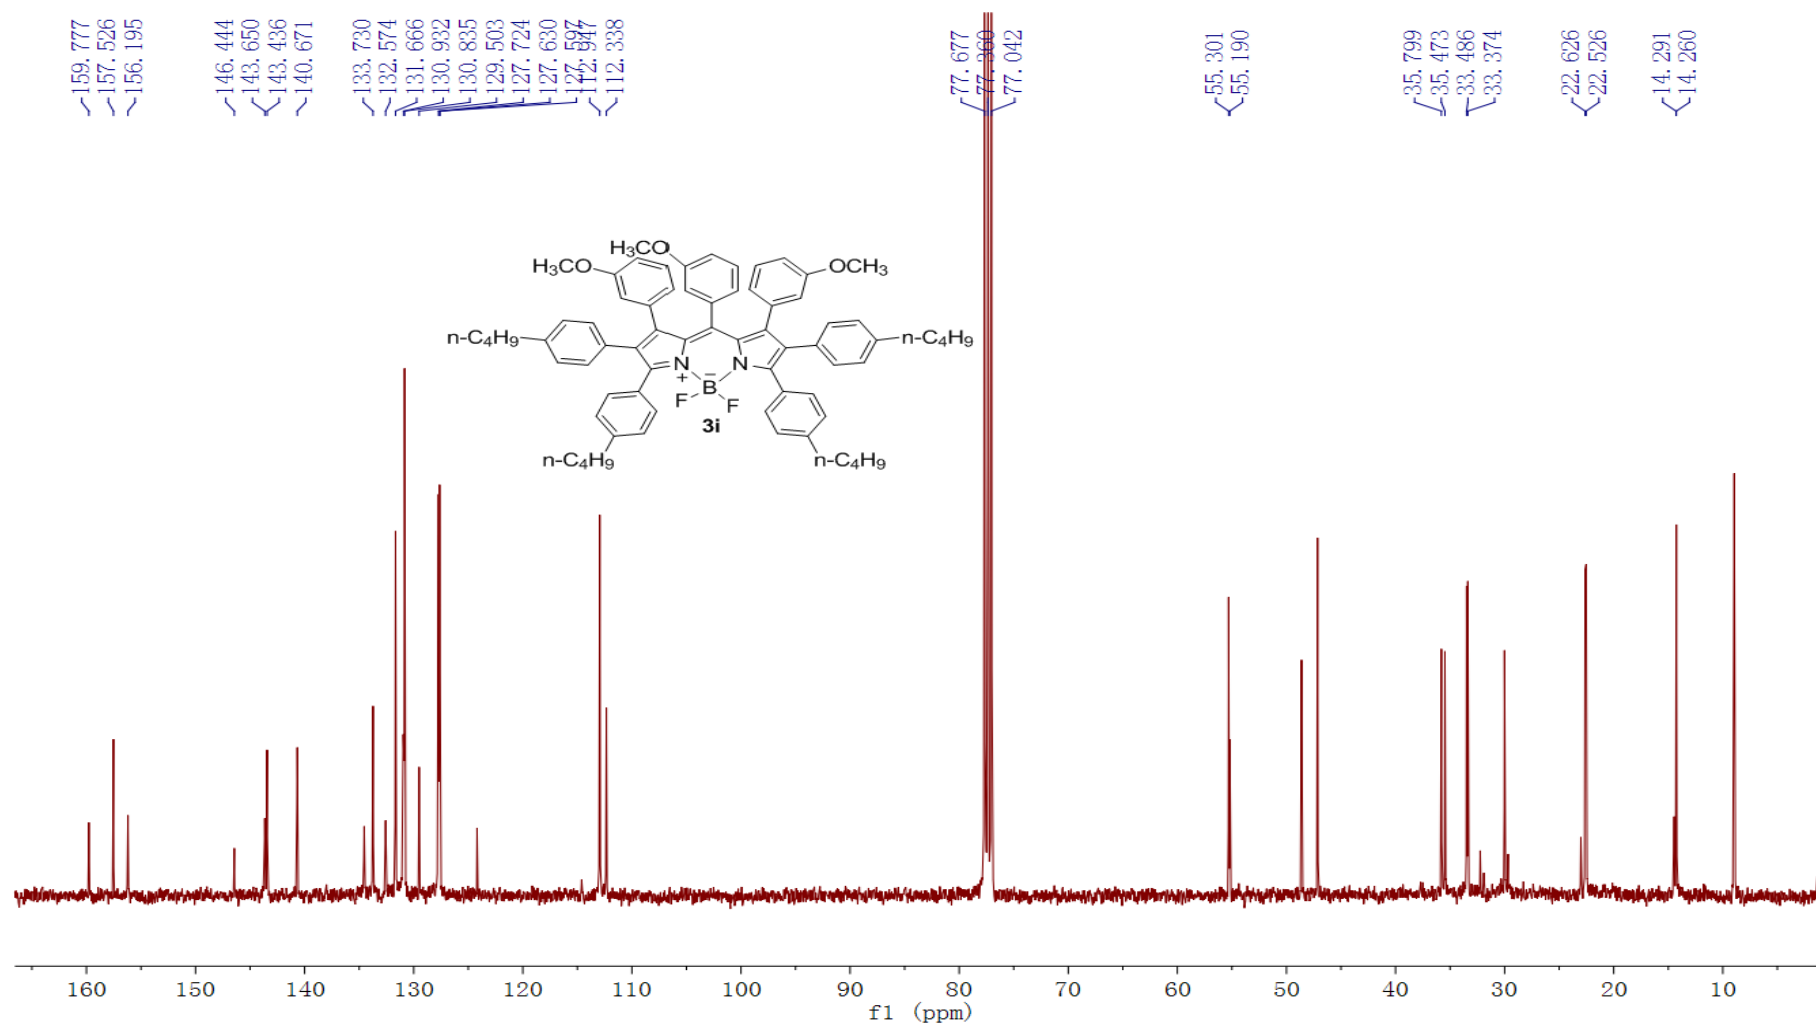

**Figure S67.** The  $^1\text{H}$  NMR spectra of **3j**.

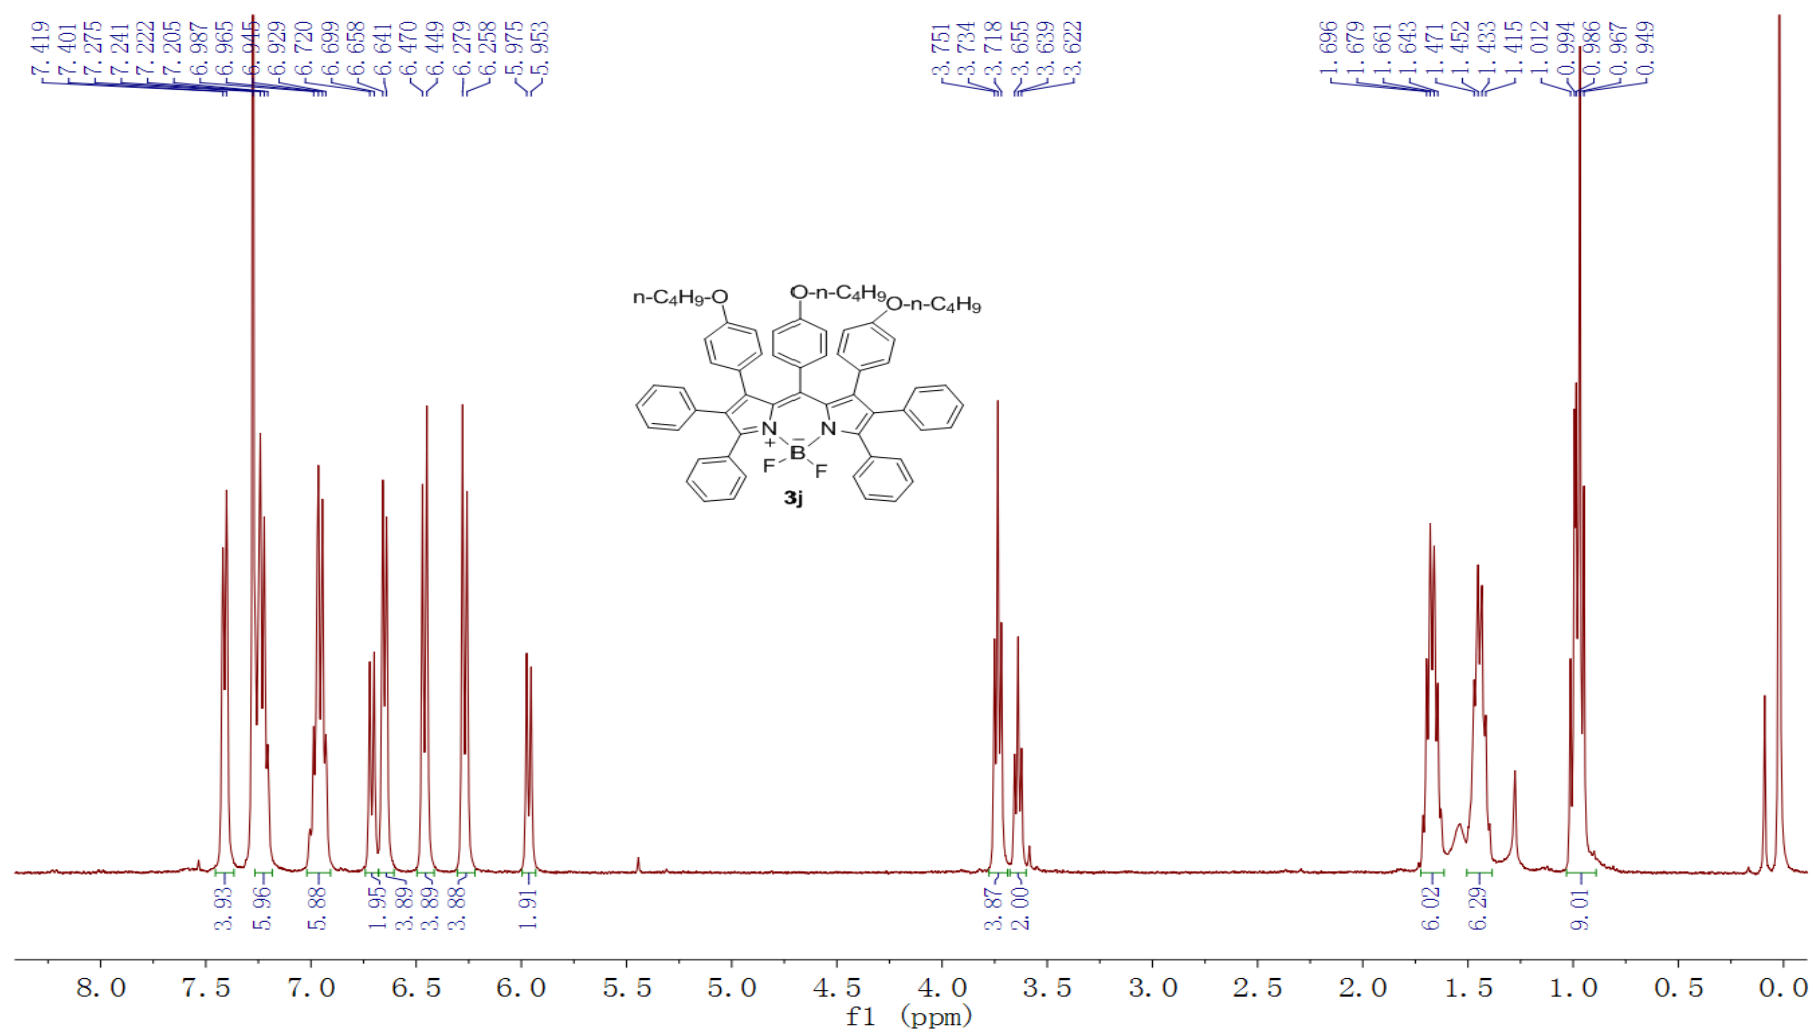

**Figure S68.** The  $^{13}\text{C}$  NMR spectra of **3j**.

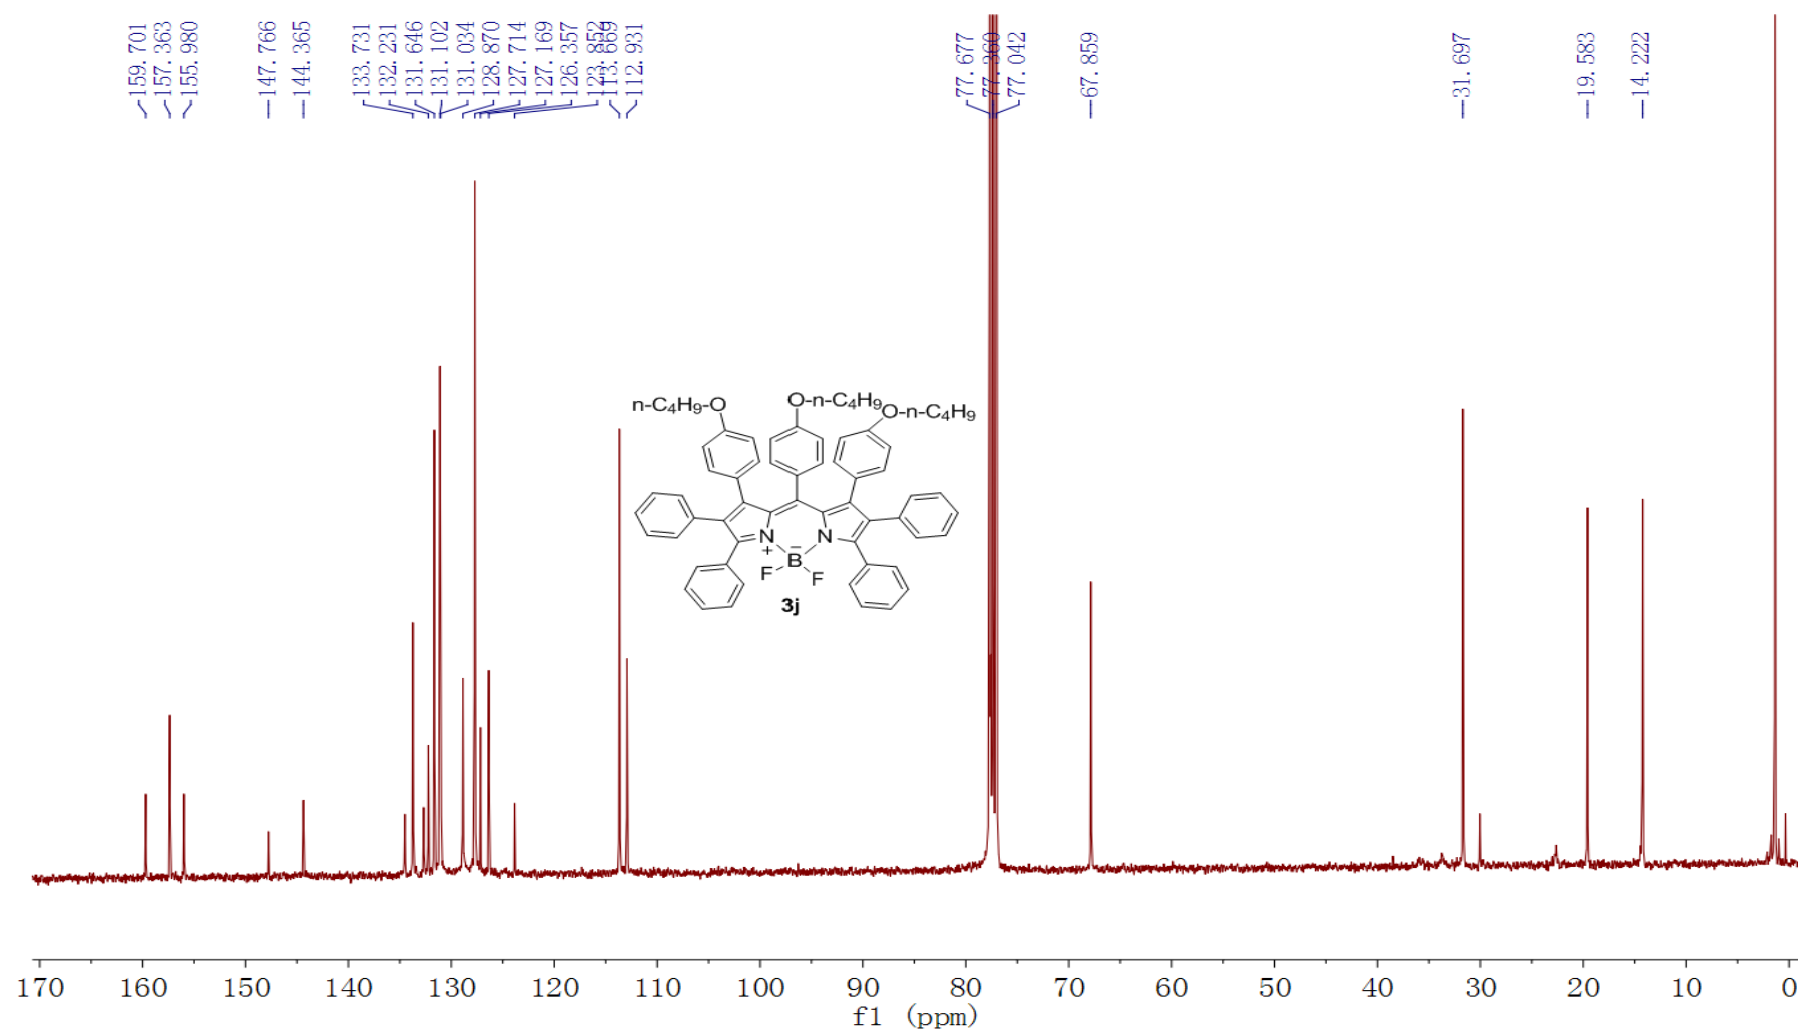

**Figure S69.** The  $^1\text{H}$  NMR spectra of **3k**.

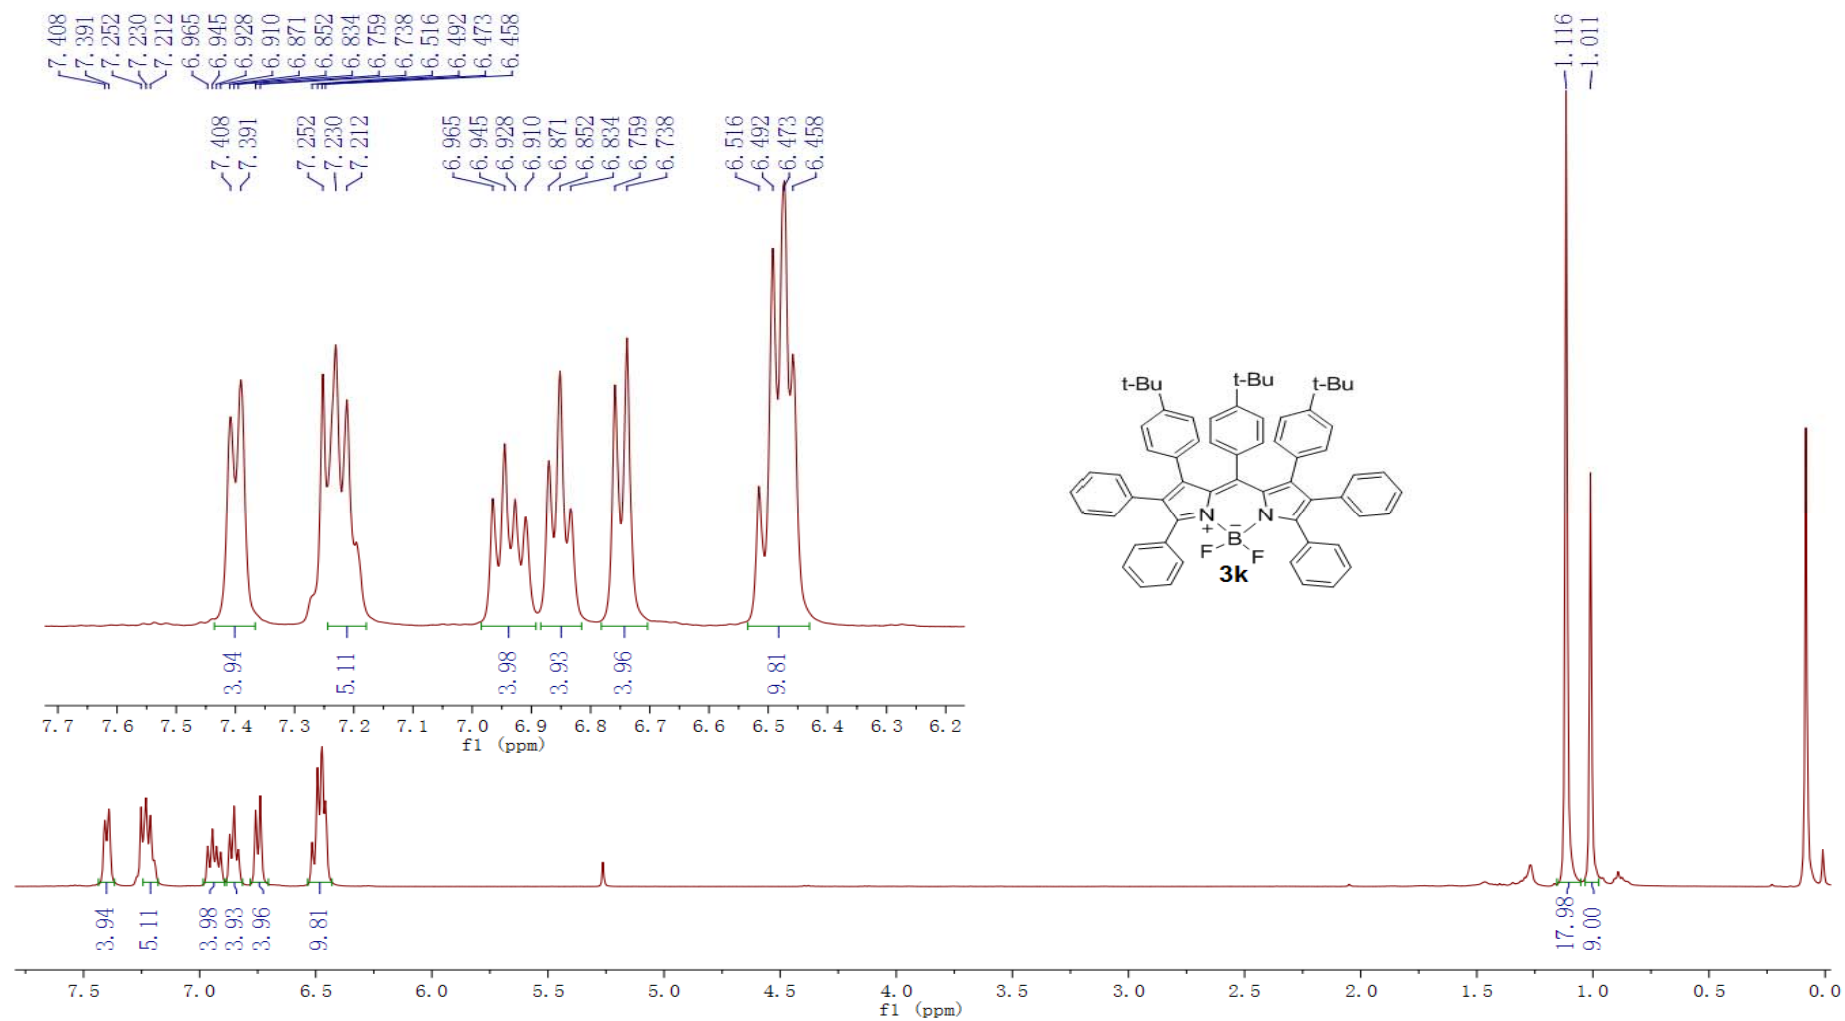

**Figure S70.** The  $^{13}\text{C}$  NMR spectra of **3k**.

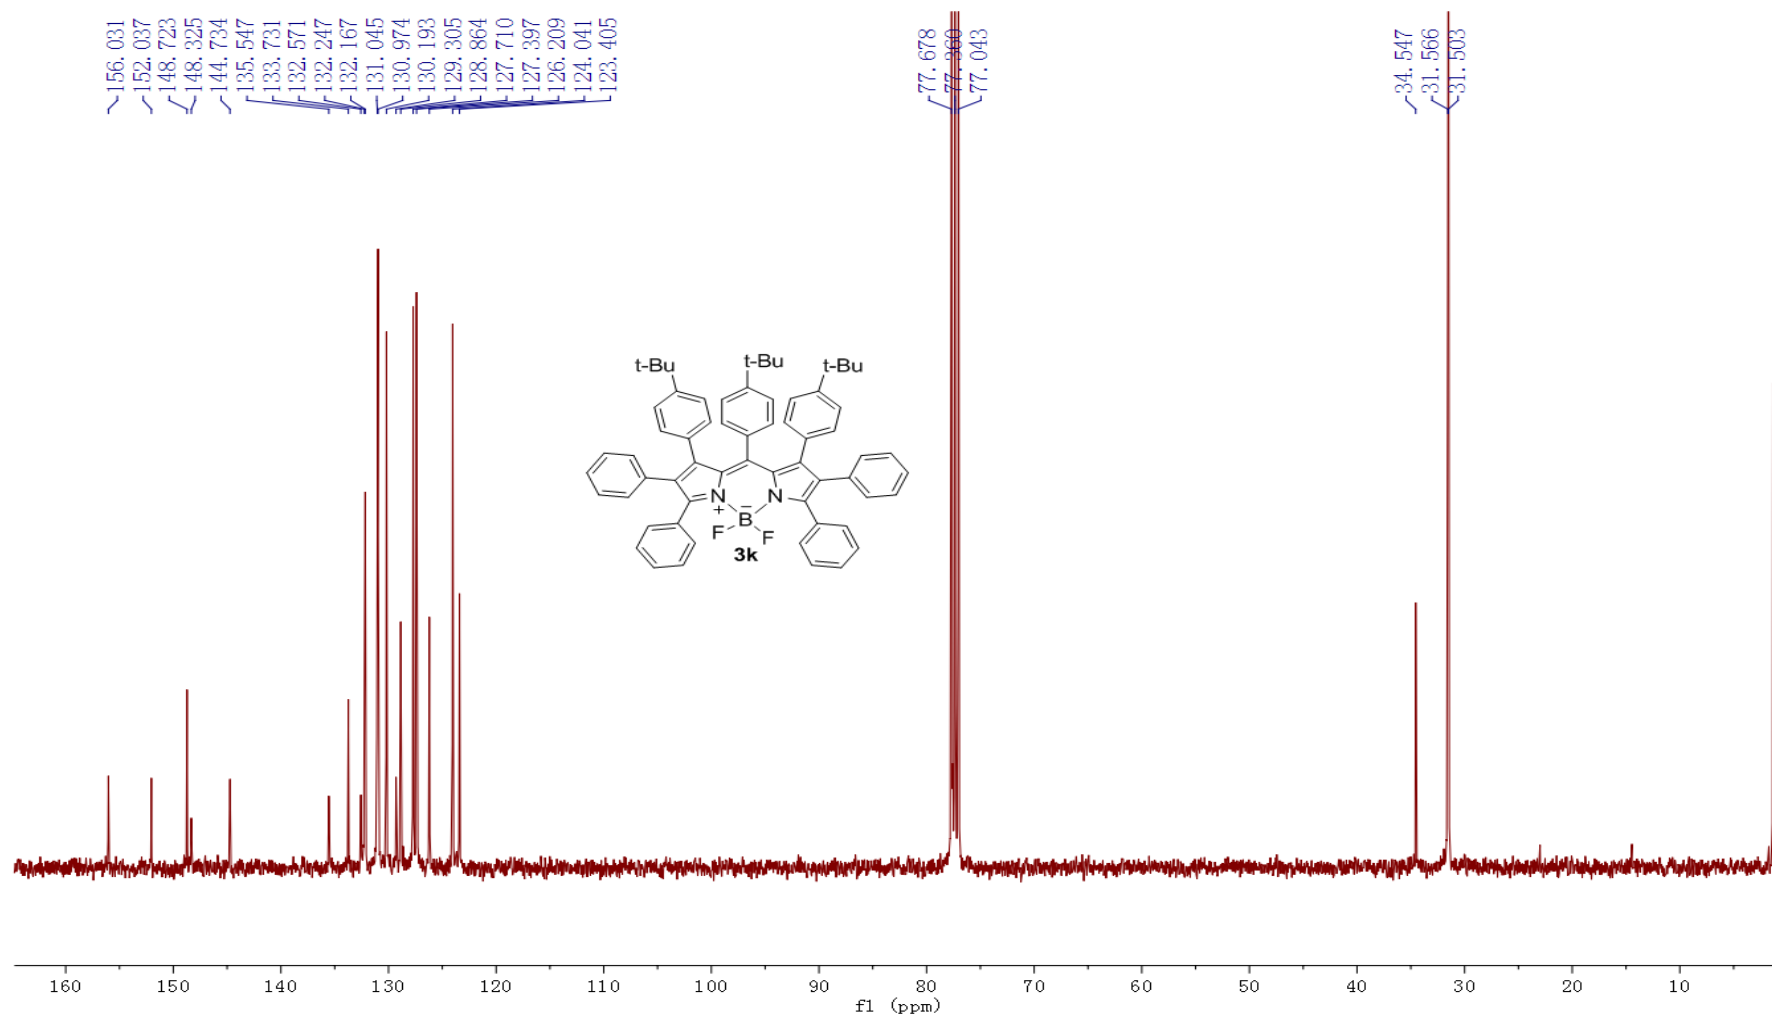

**Figure S71.** The  $^1\text{H}$  NMR spectra of **3l**.

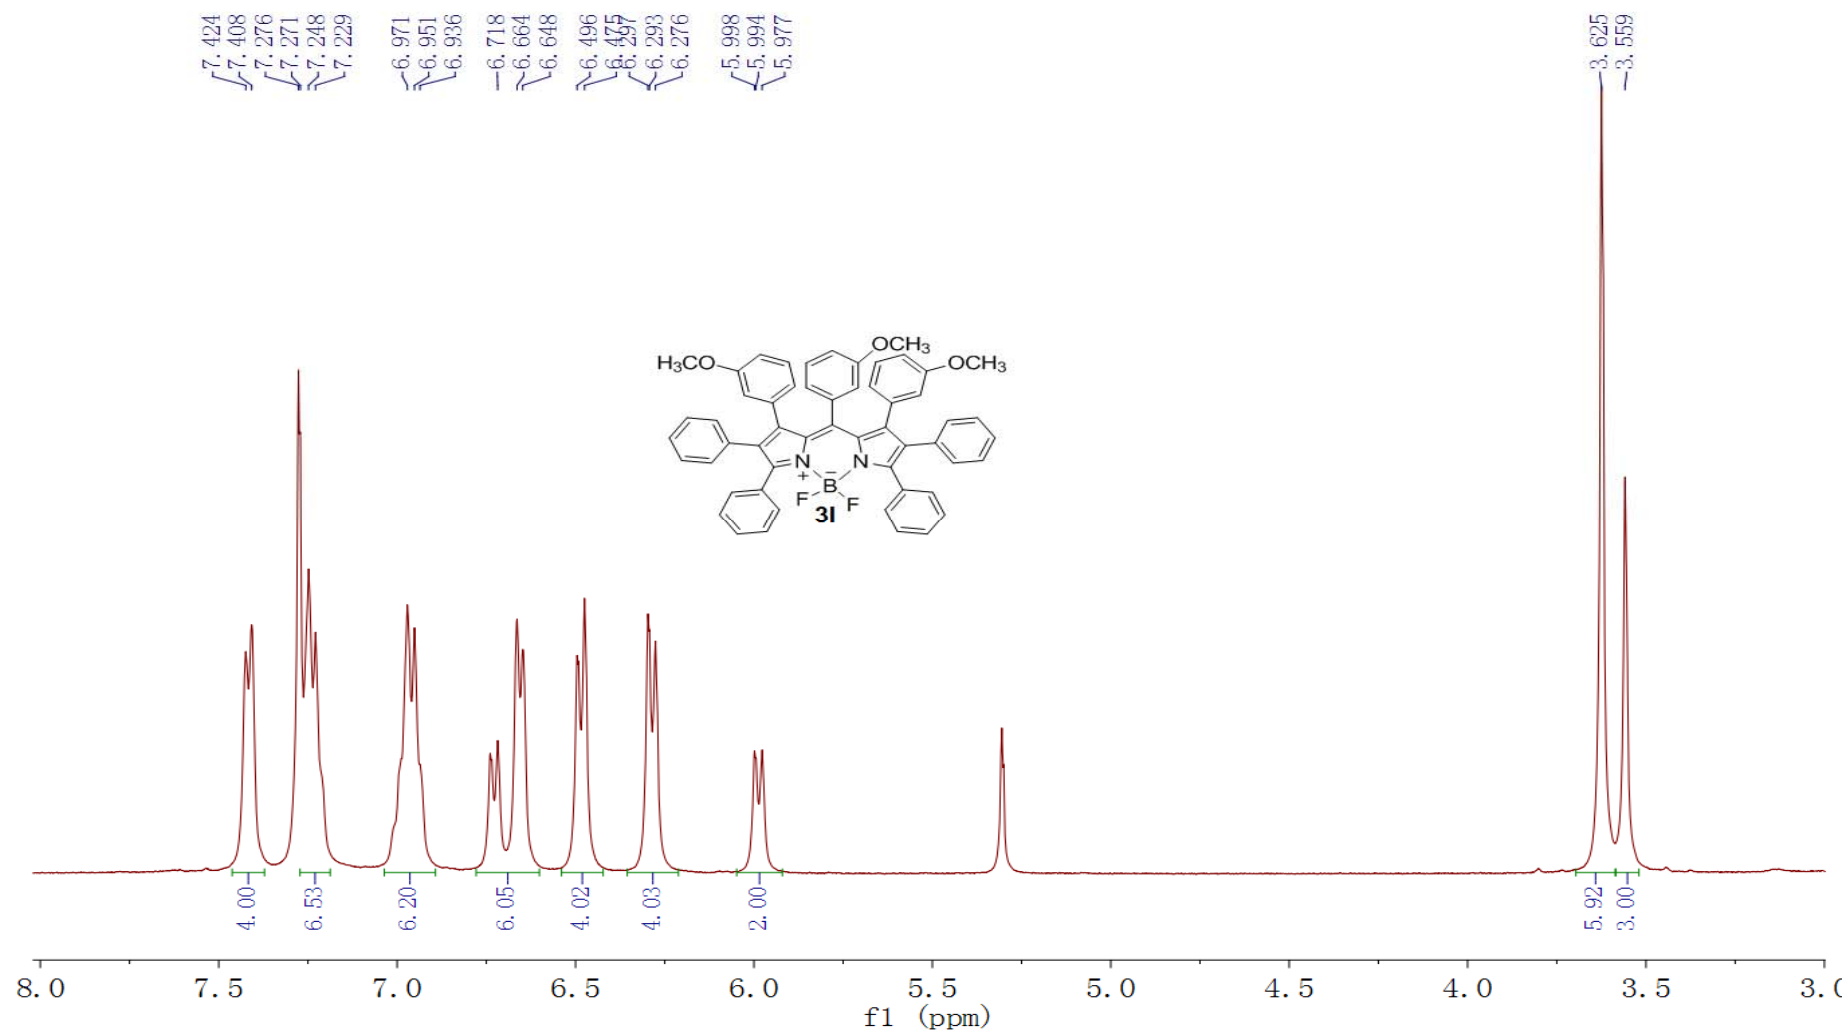

**Figure S72.** The  $^1\text{H}$  NMR spectra of **3l**.

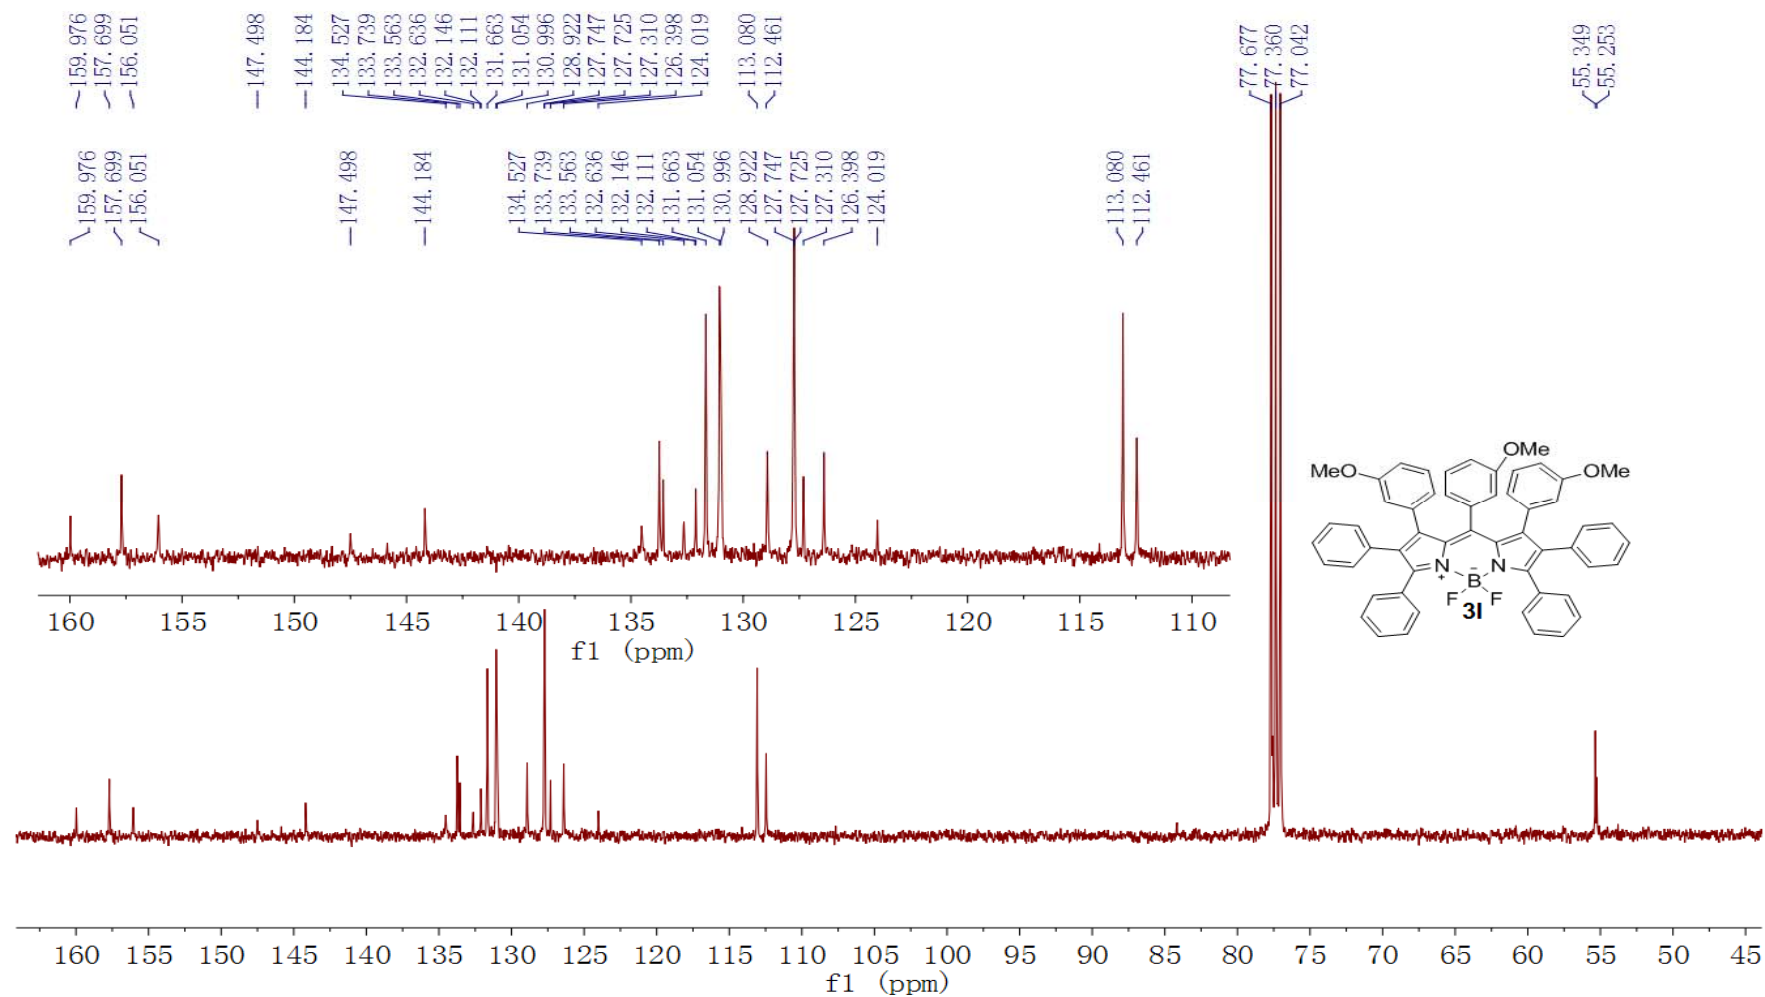

**Figure S73.** The  $^1\text{H}$  NMR spectra of **3m**.

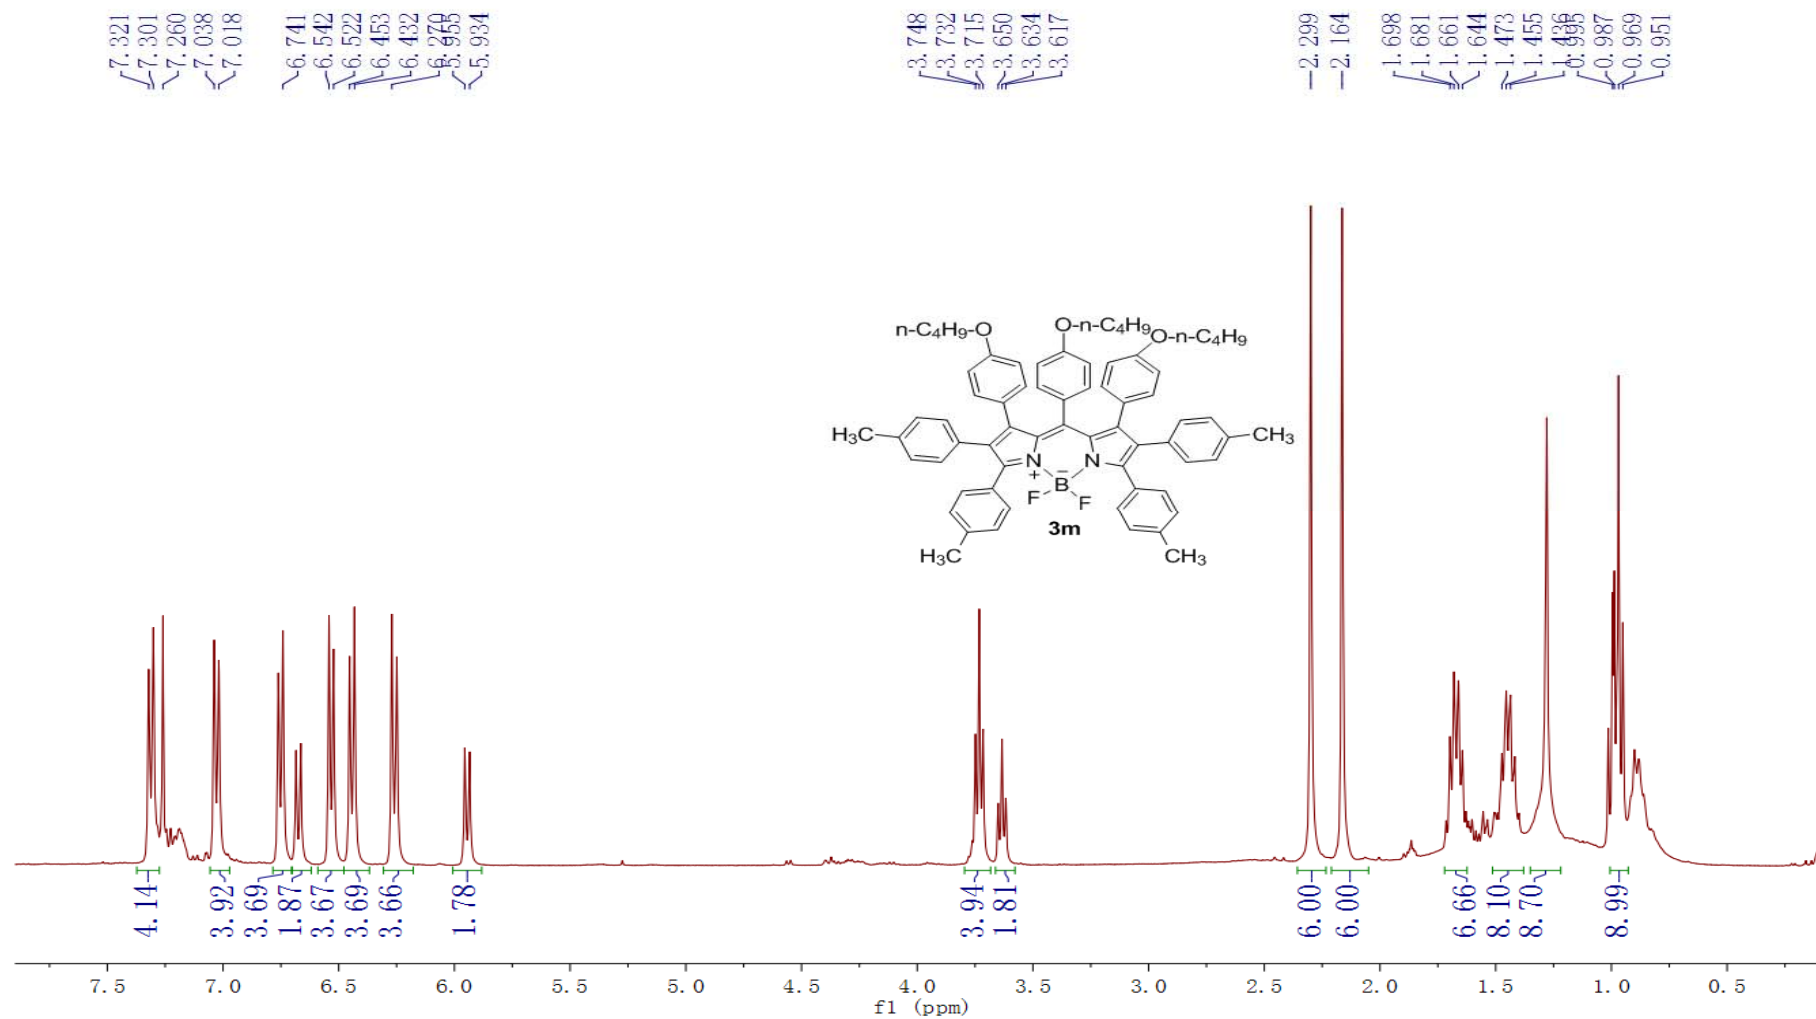



**Figure S74.** The  $^{13}\text{C}$  NMR spectra of **3m**.

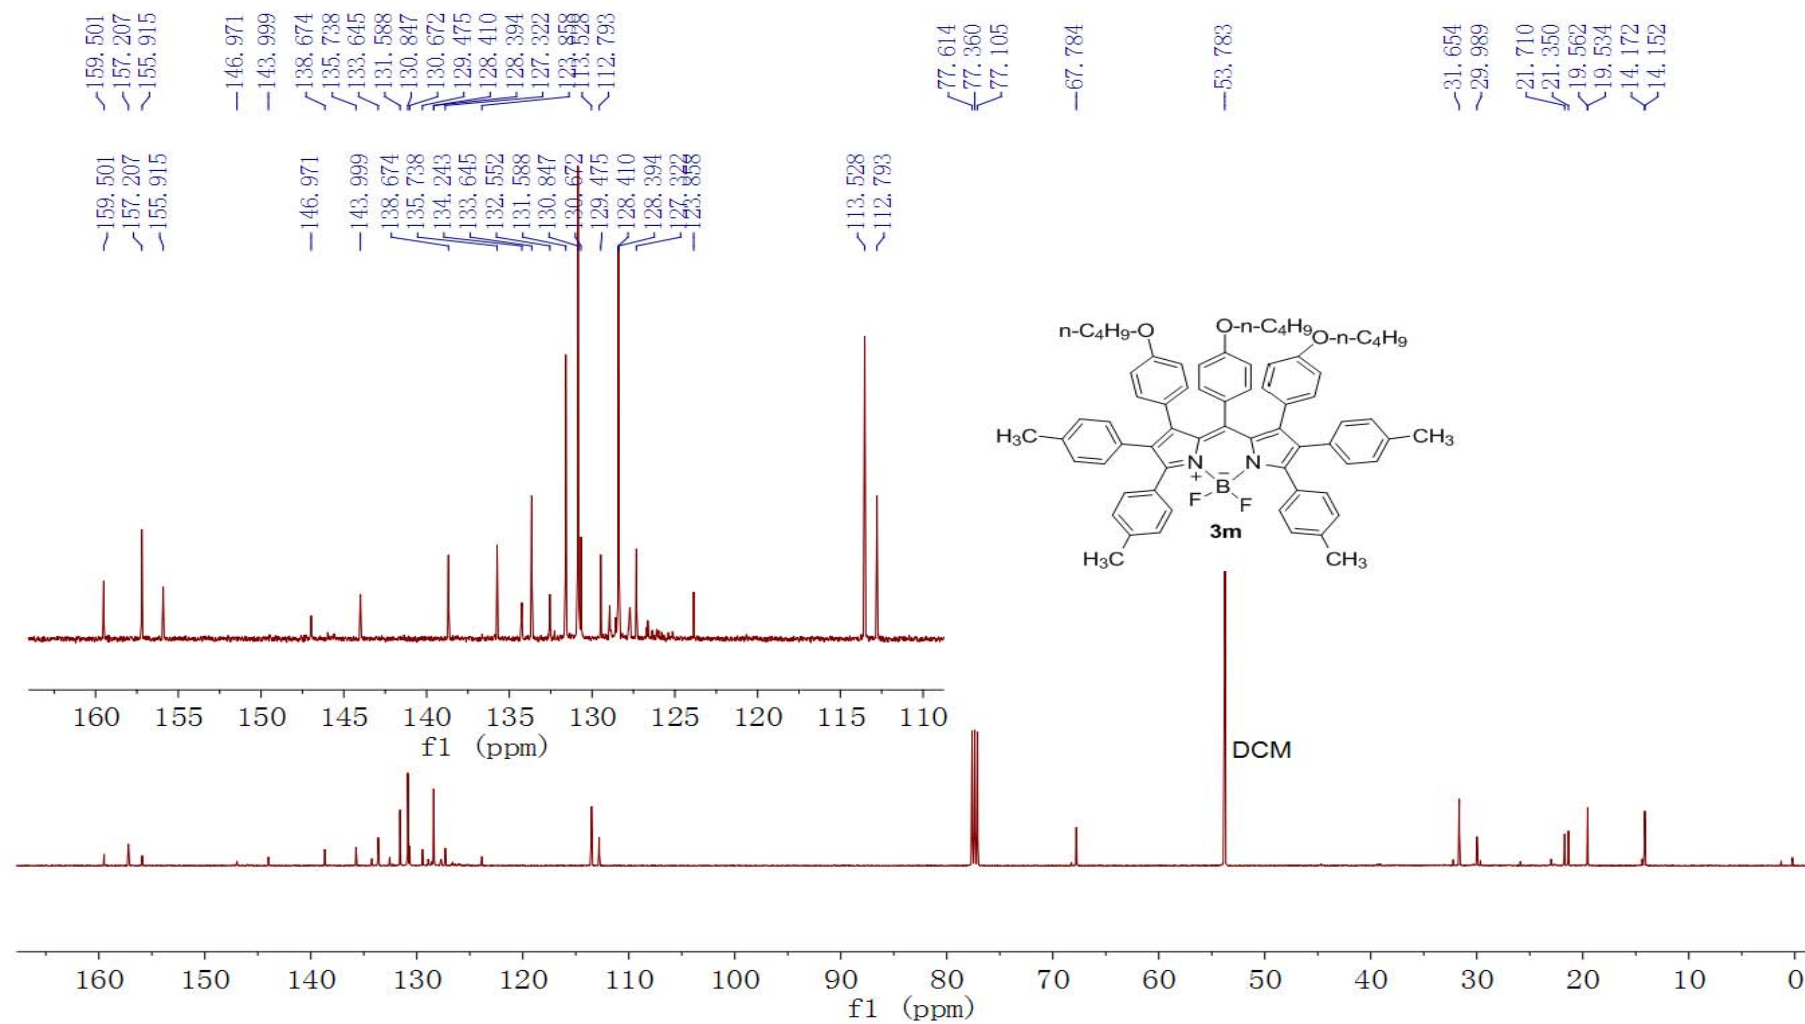

**Figure S75.** The  $^1\text{H}$  NMR spectra of **3n**.

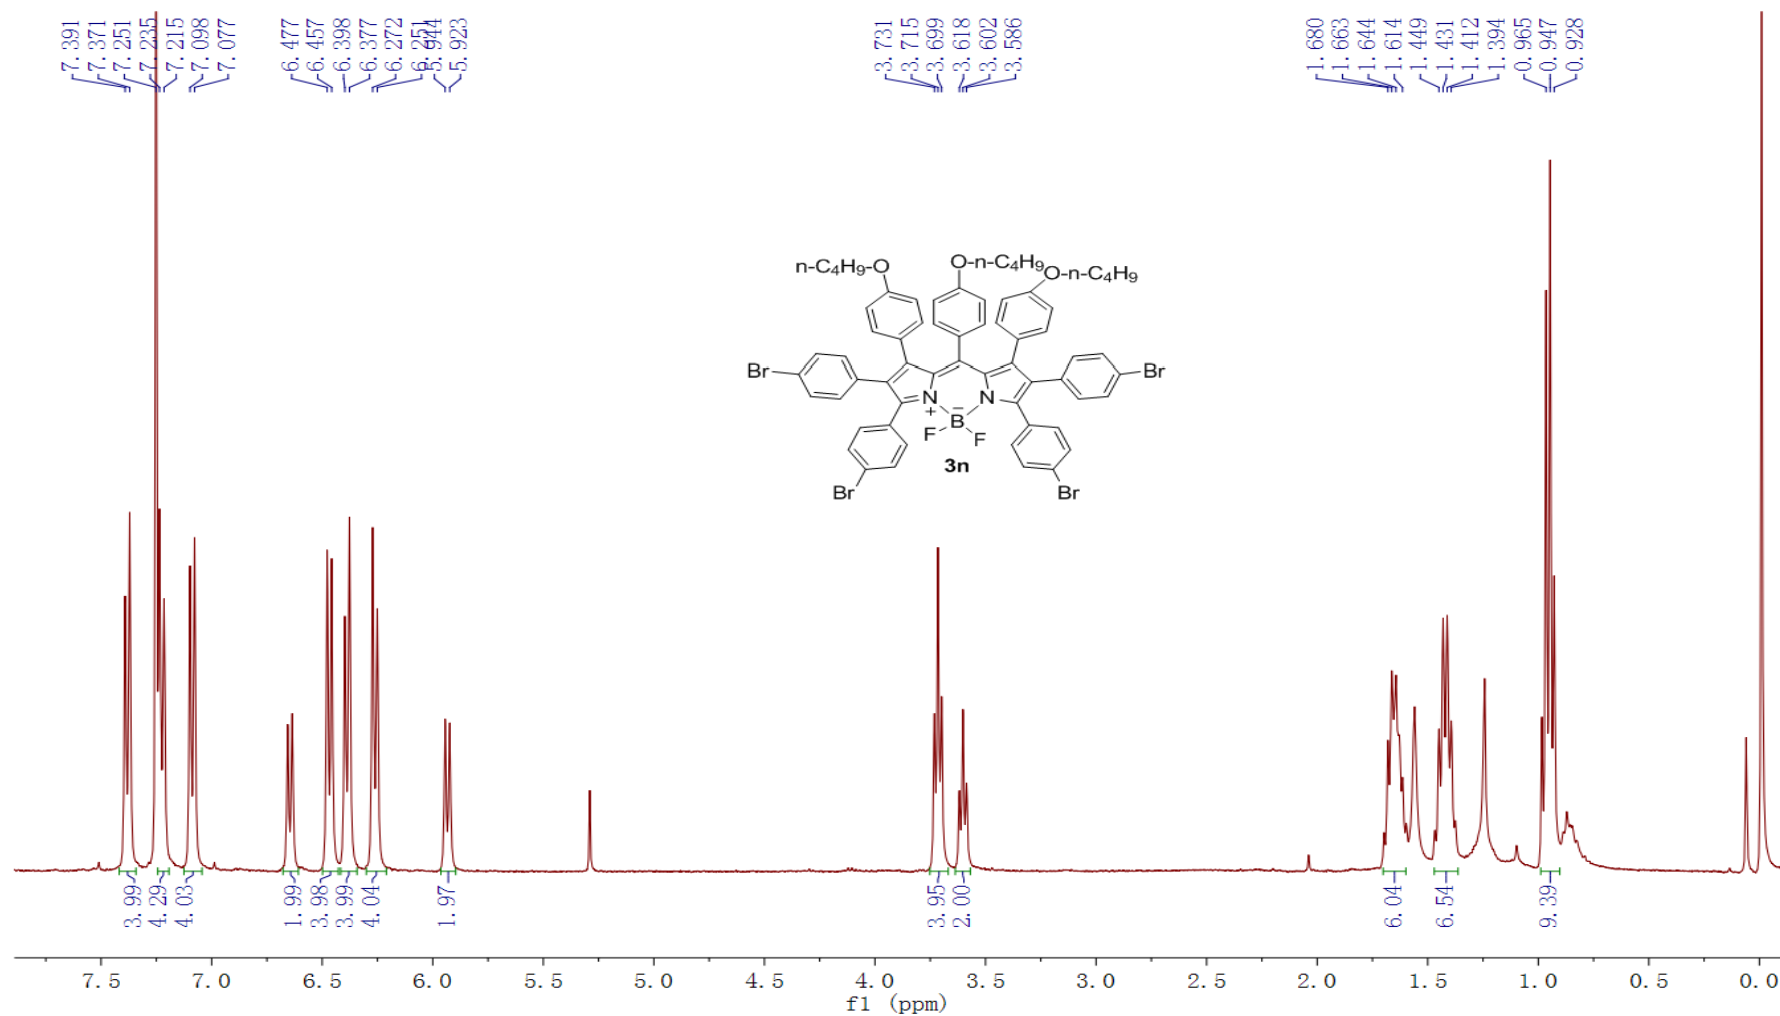

**Figure S76.** The  $^{13}\text{C}$  NMR spectra of **3n**.

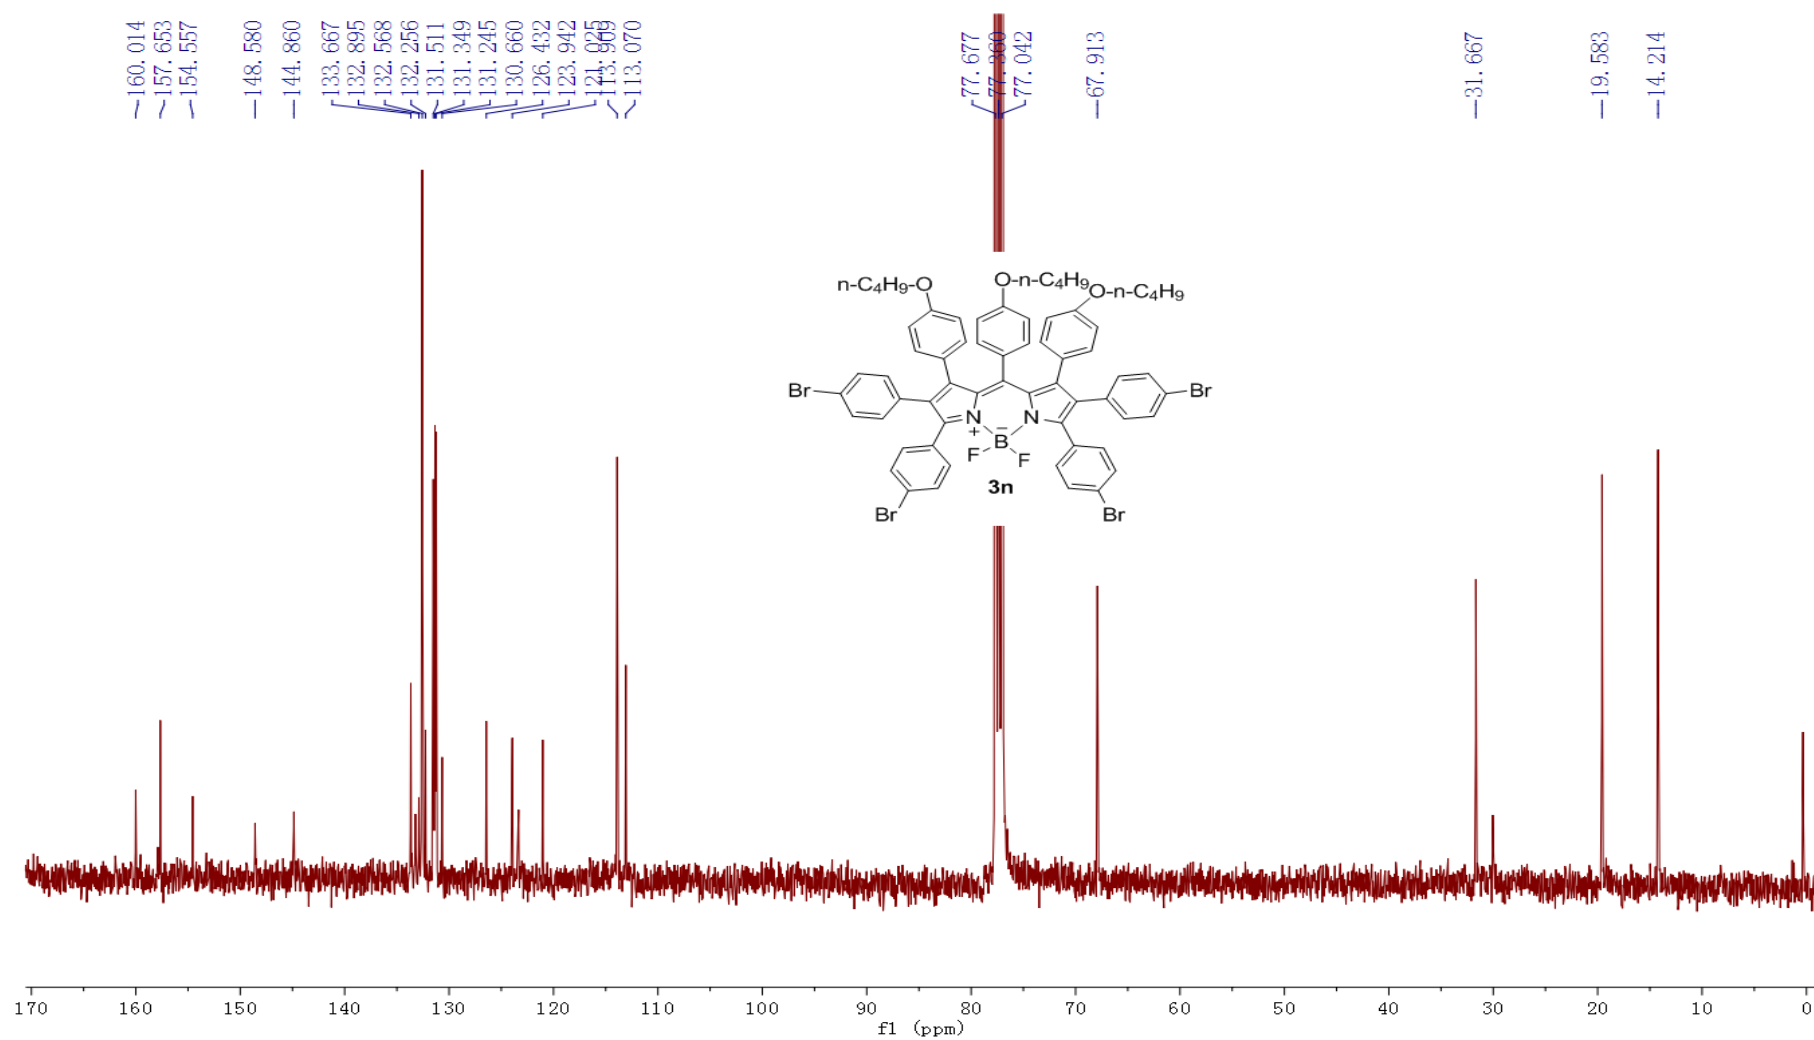

**Figure S77.** The  $^1\text{H}$  NMR spectra of **3o**.

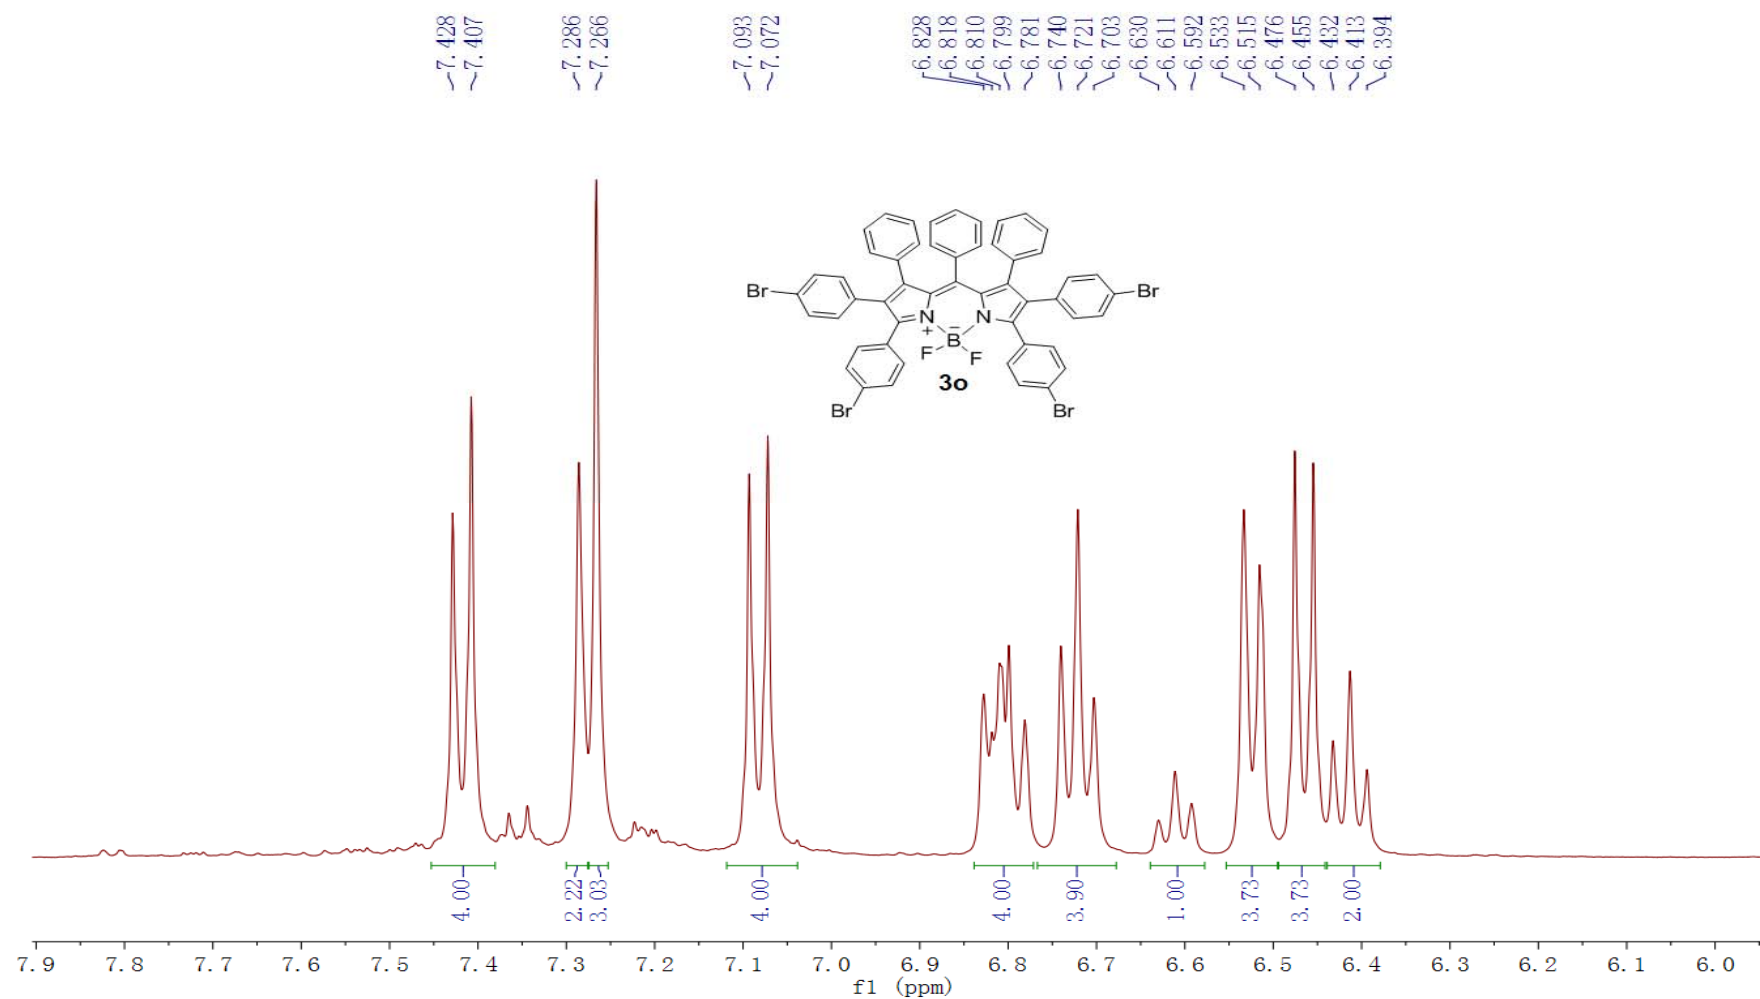

**Figure S78.** The  $^1\text{H}$  NMR spectra of **3p**.

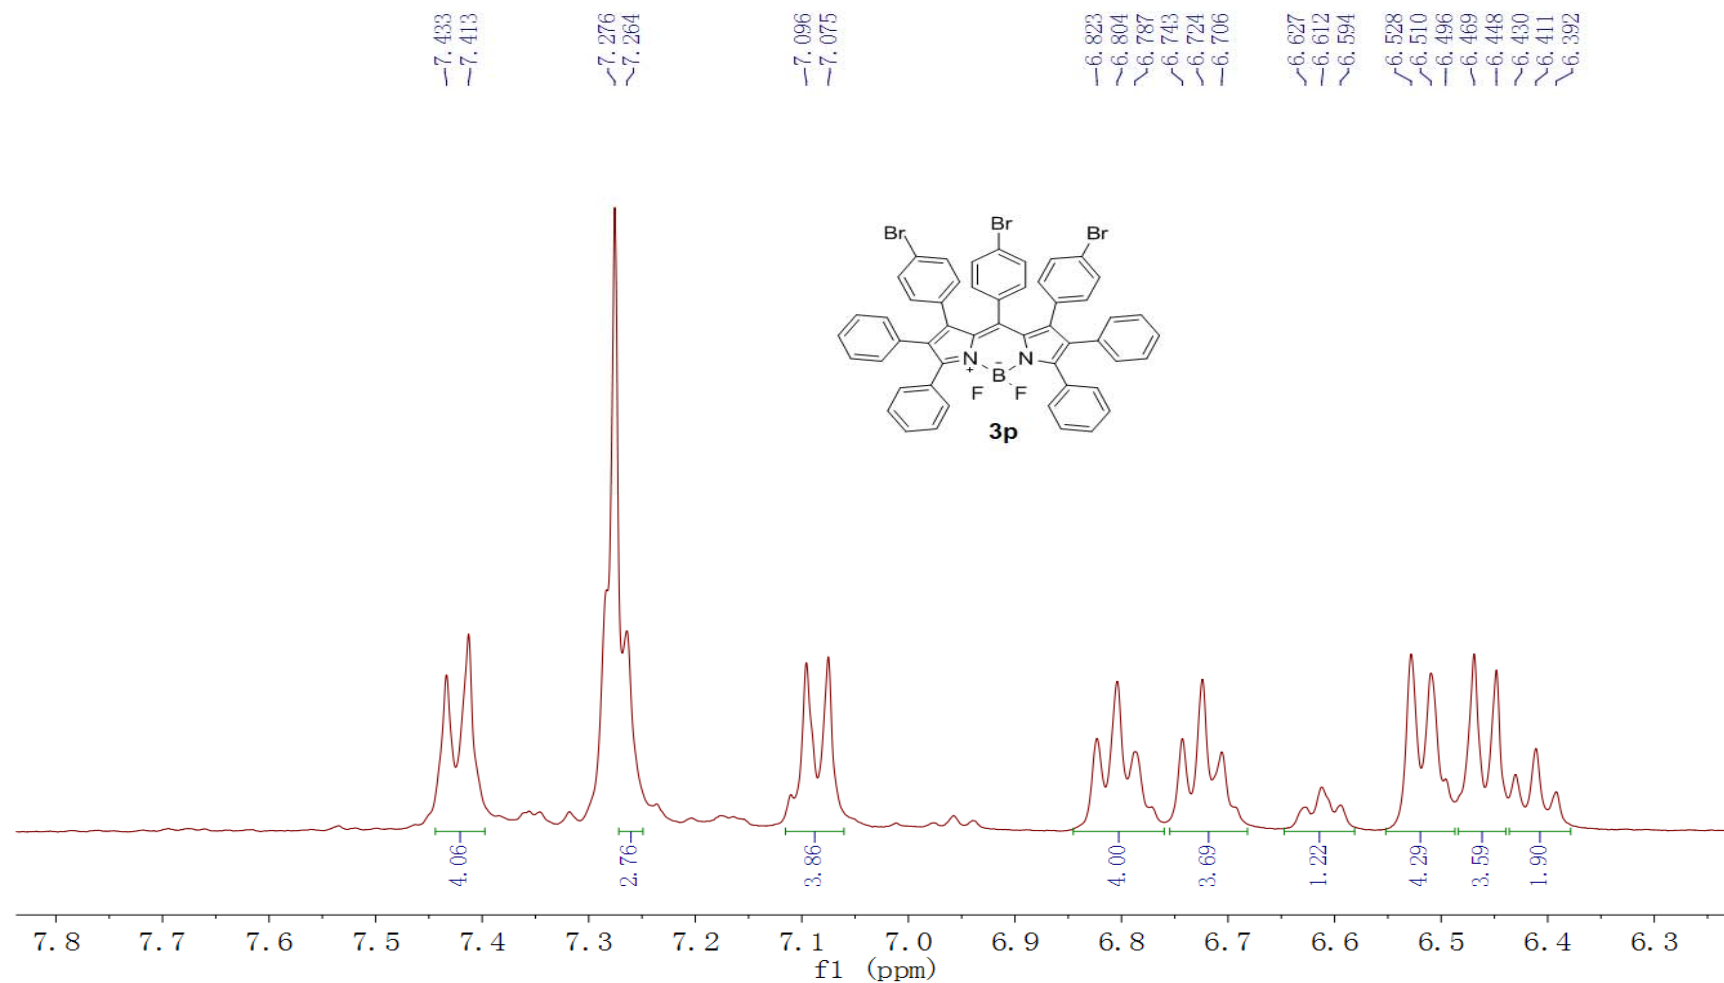

6.  $^1\text{H}$  NMR and  $^{13}\text{C}$  NMR spectra of **4-5**

**Figure S79.** The  $^1\text{H}$  NMR spectra of **4a**.

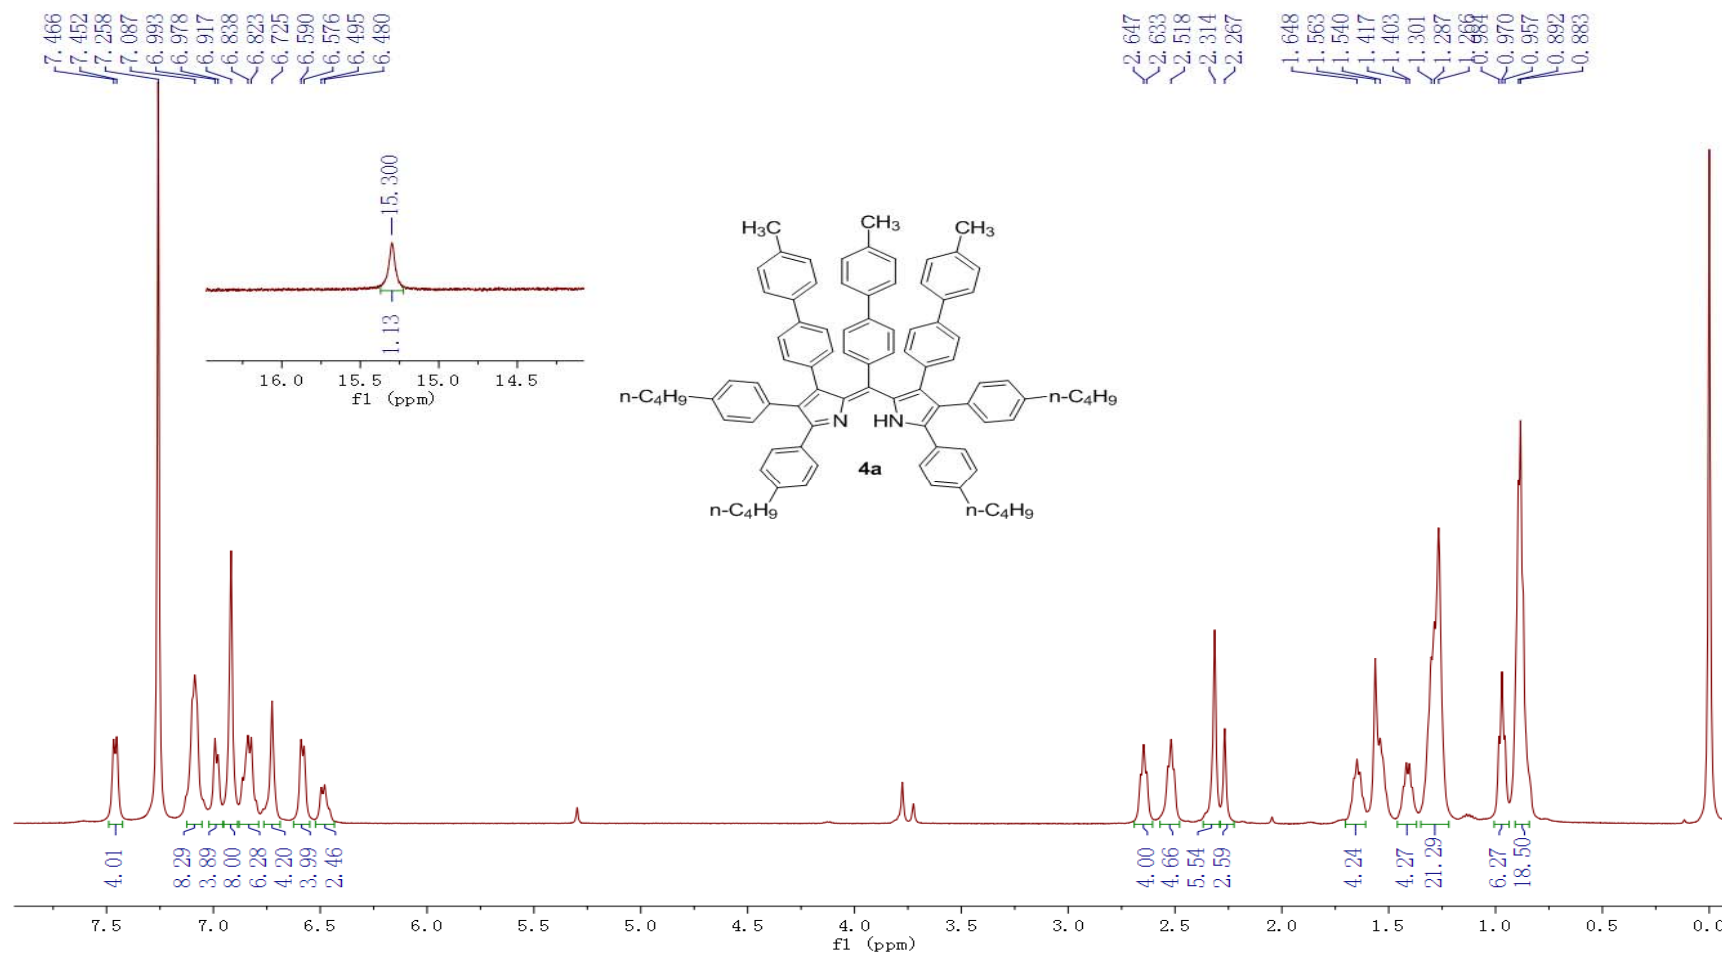

**Figure S80.** The  $^{13}\text{C}$  NMR spectra of **4a**.

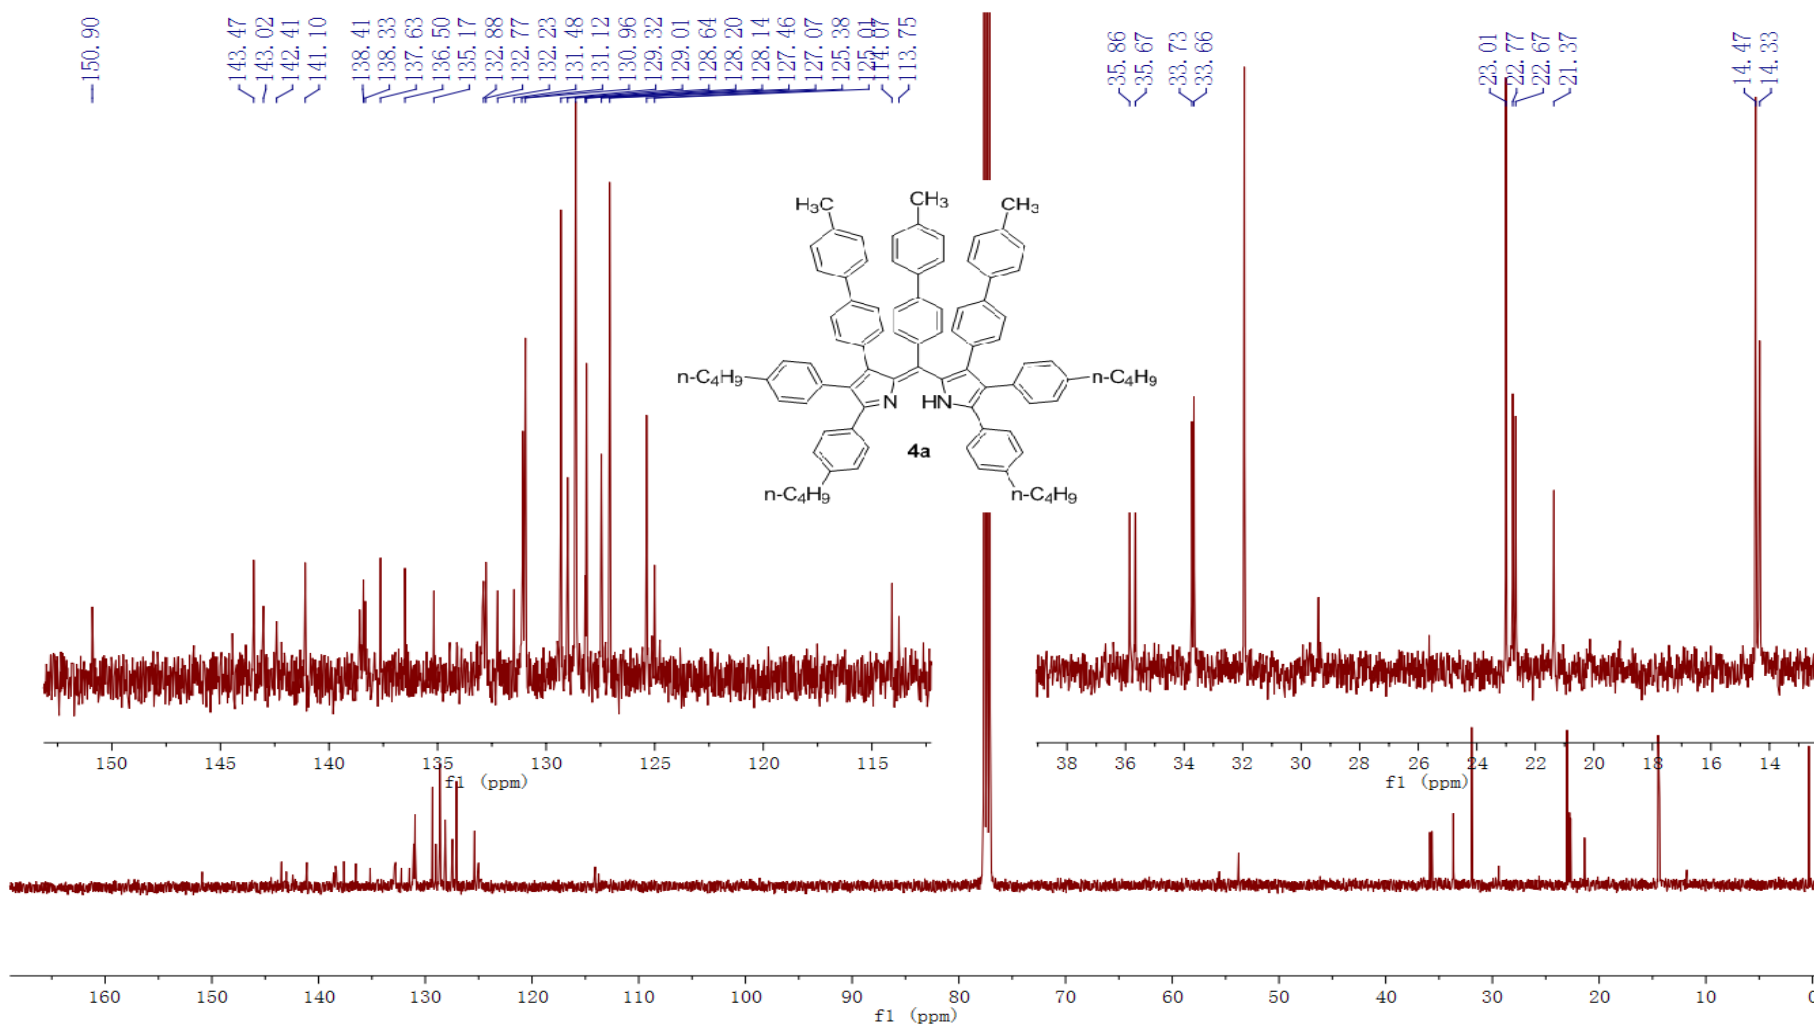

**Figure S81.** The  $^1\text{H}$  NMR spectra of **4b**.

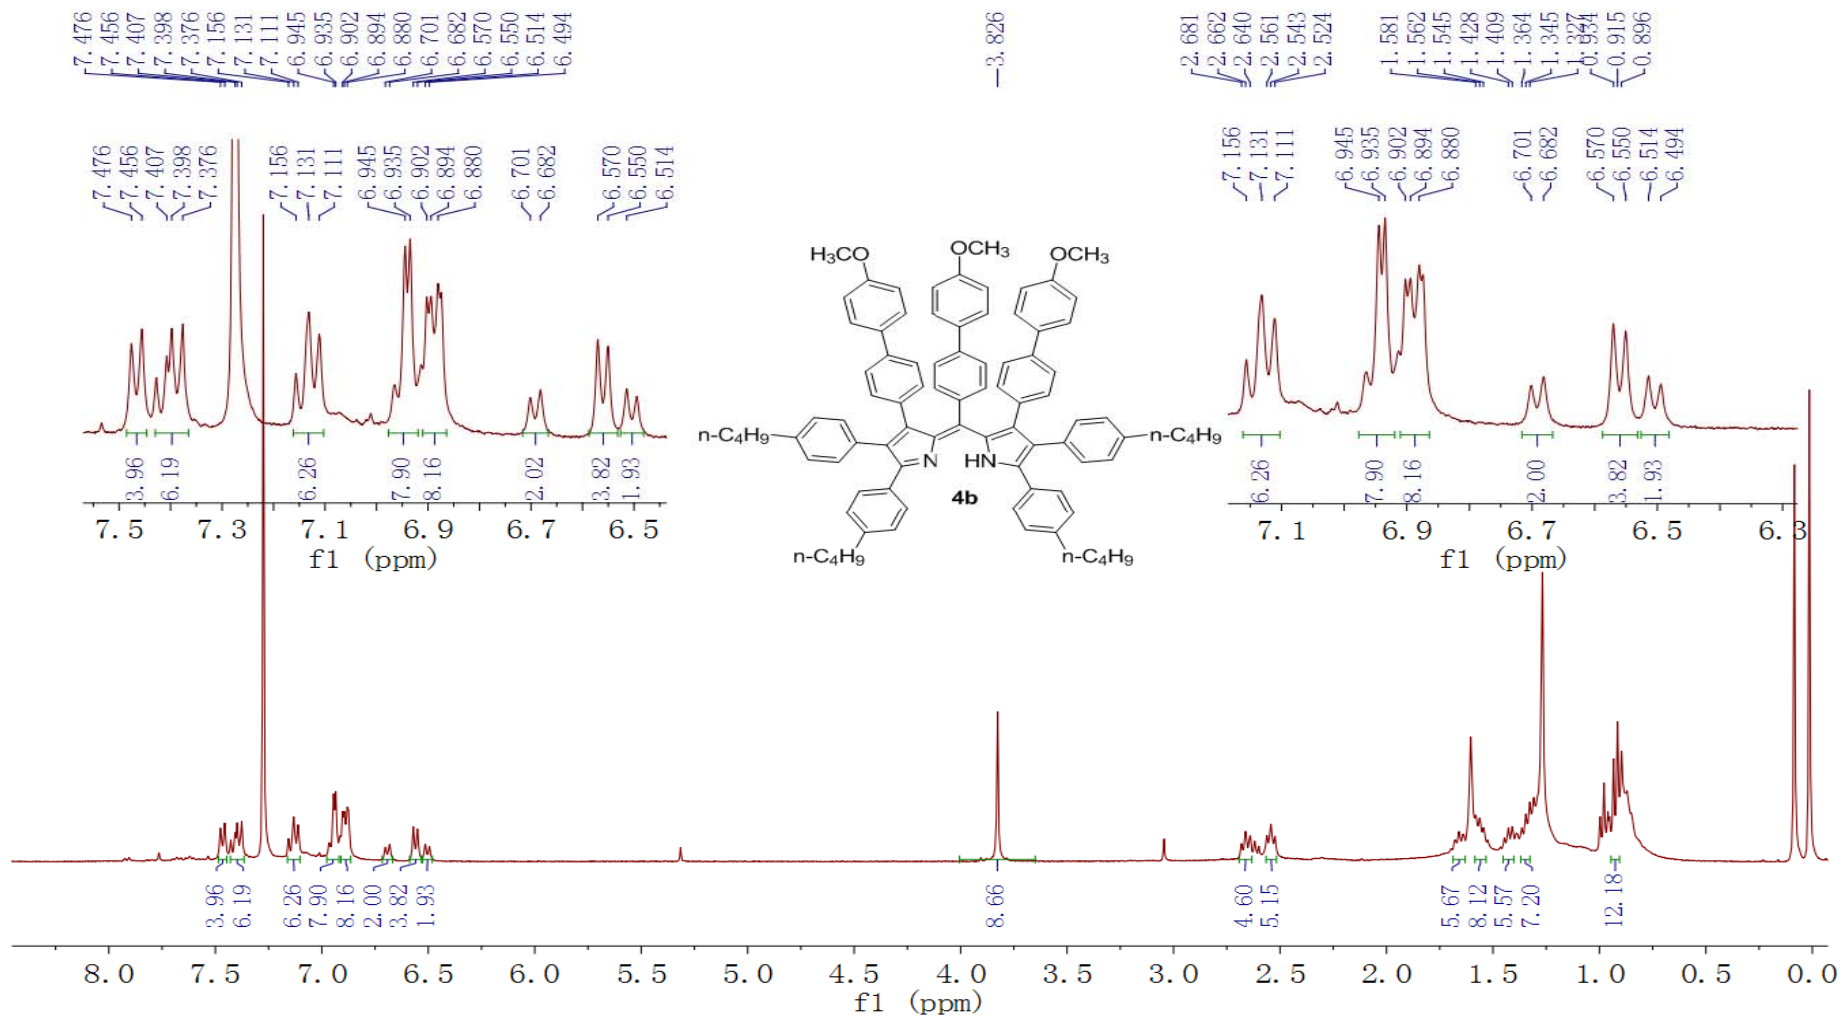



**Figure S82.** The  $^1\text{H}$  NMR spectra of **4c**.

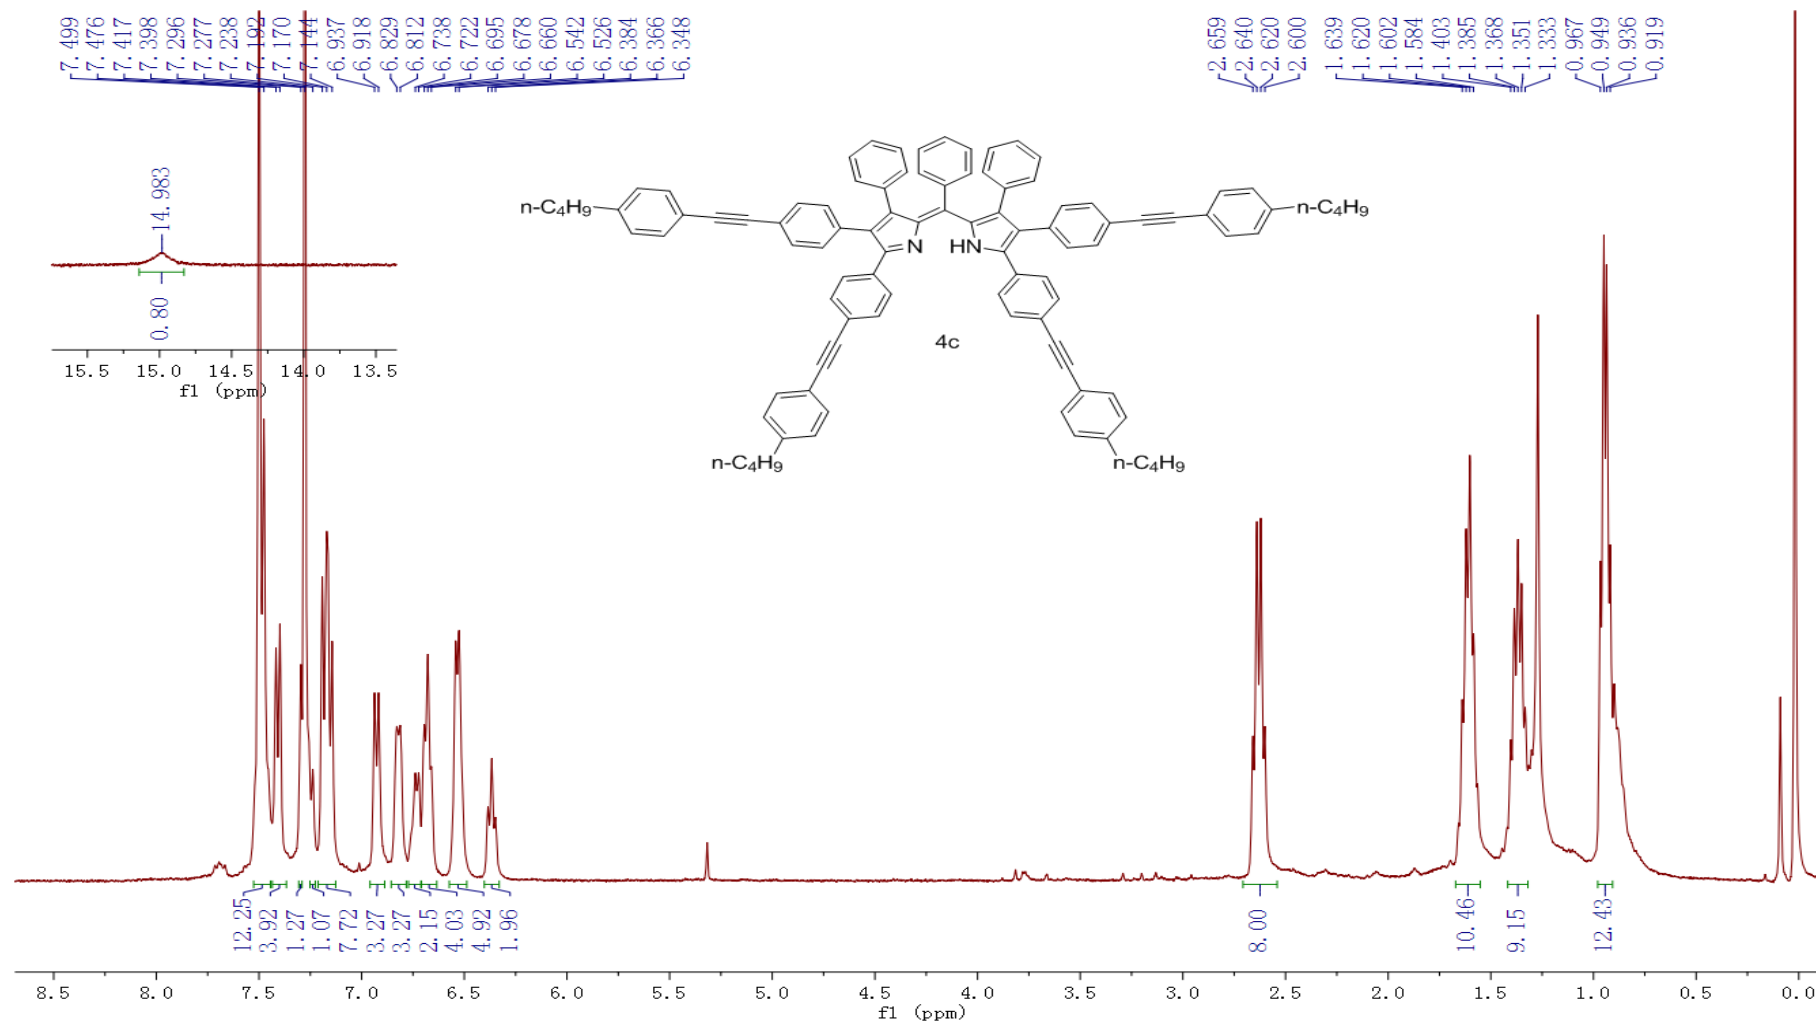

**Figure S83.** The  $^{13}\text{C}$  NMR spectra of **4c**.

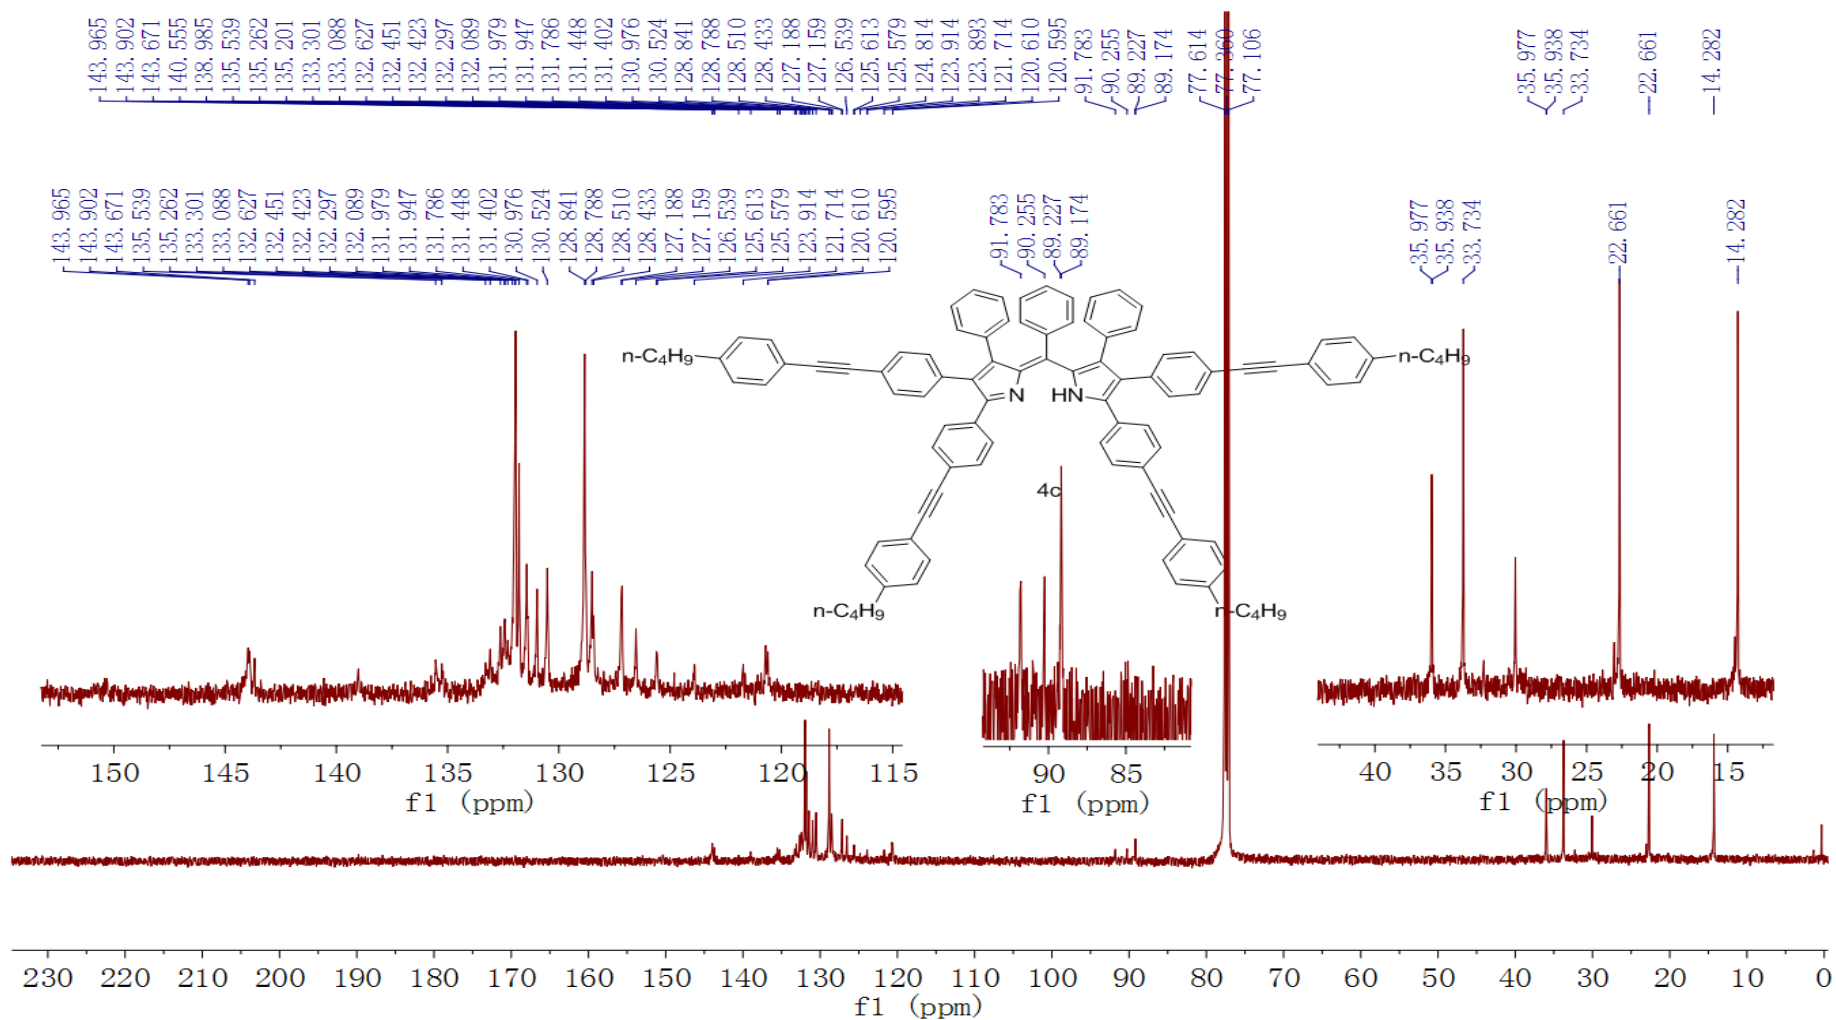

**Figure S84.** The  $^1\text{H}$  NMR spectra of **4d**.

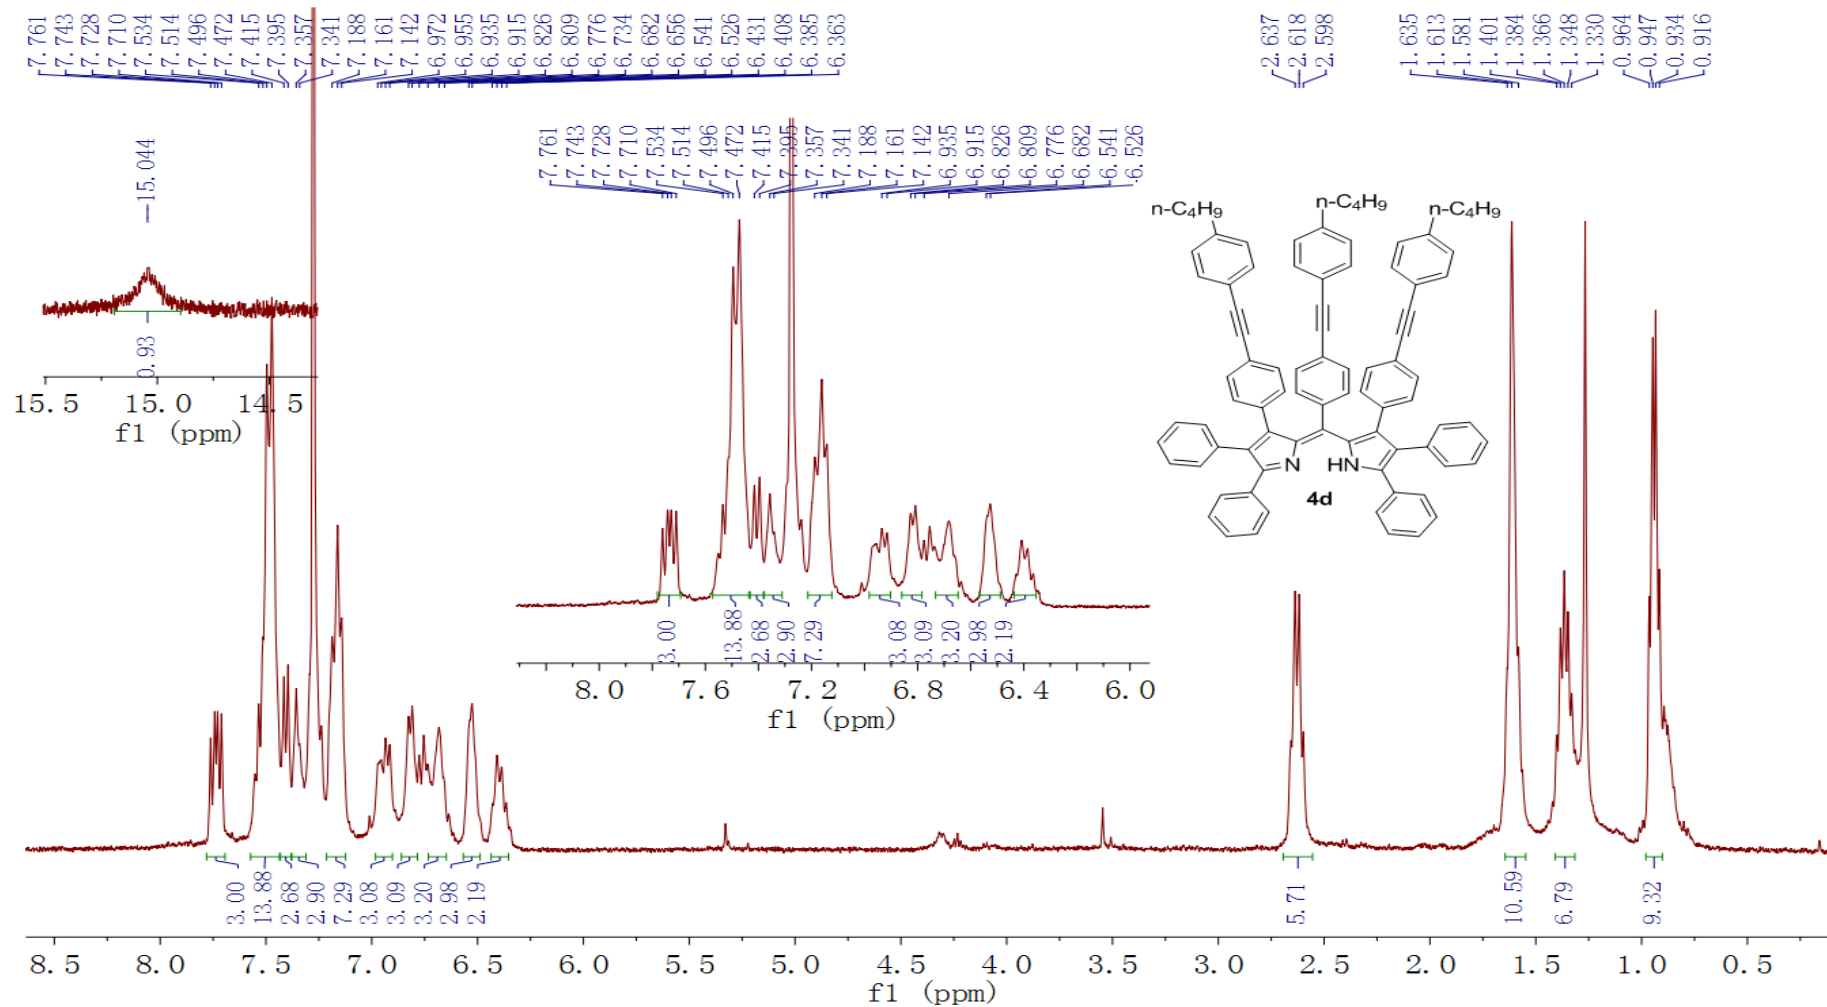

**Figure S85.** The  $^1\text{H}$  NMR spectra of **5a**.

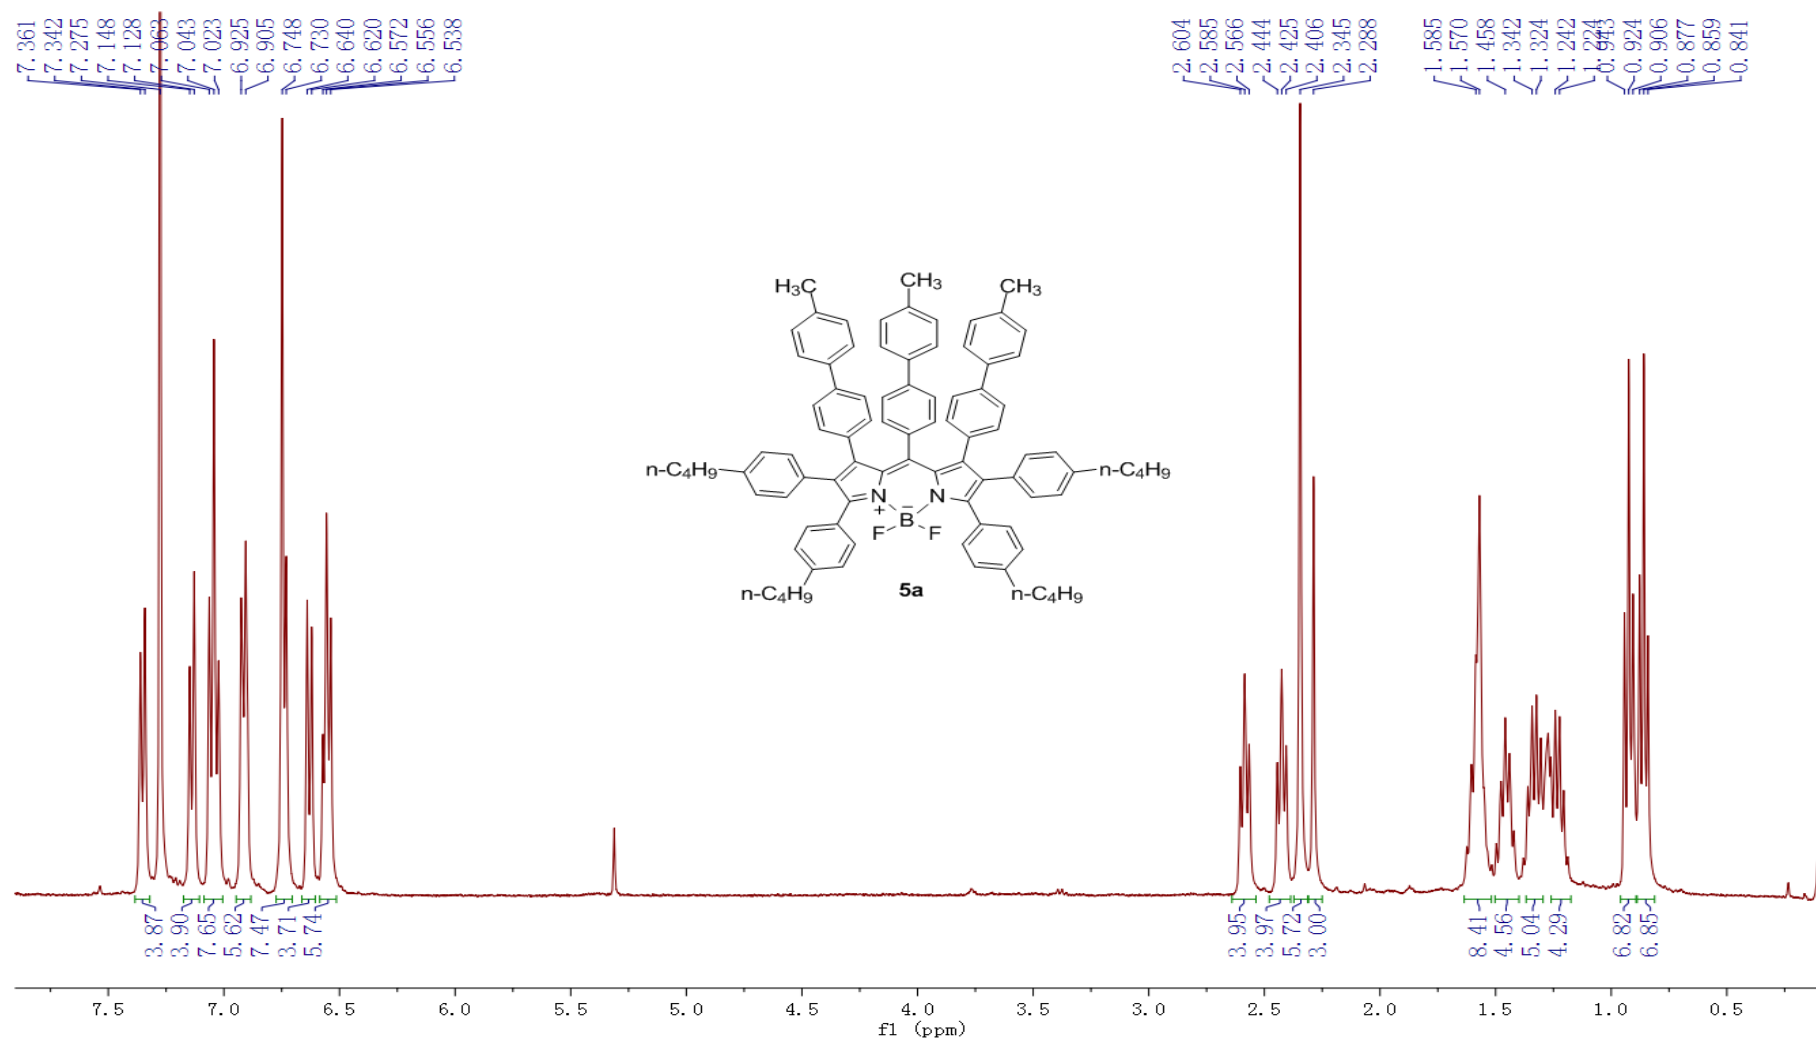

**Figure S86.** The  $^{13}\text{C}$  NMR spectra of **5a**.

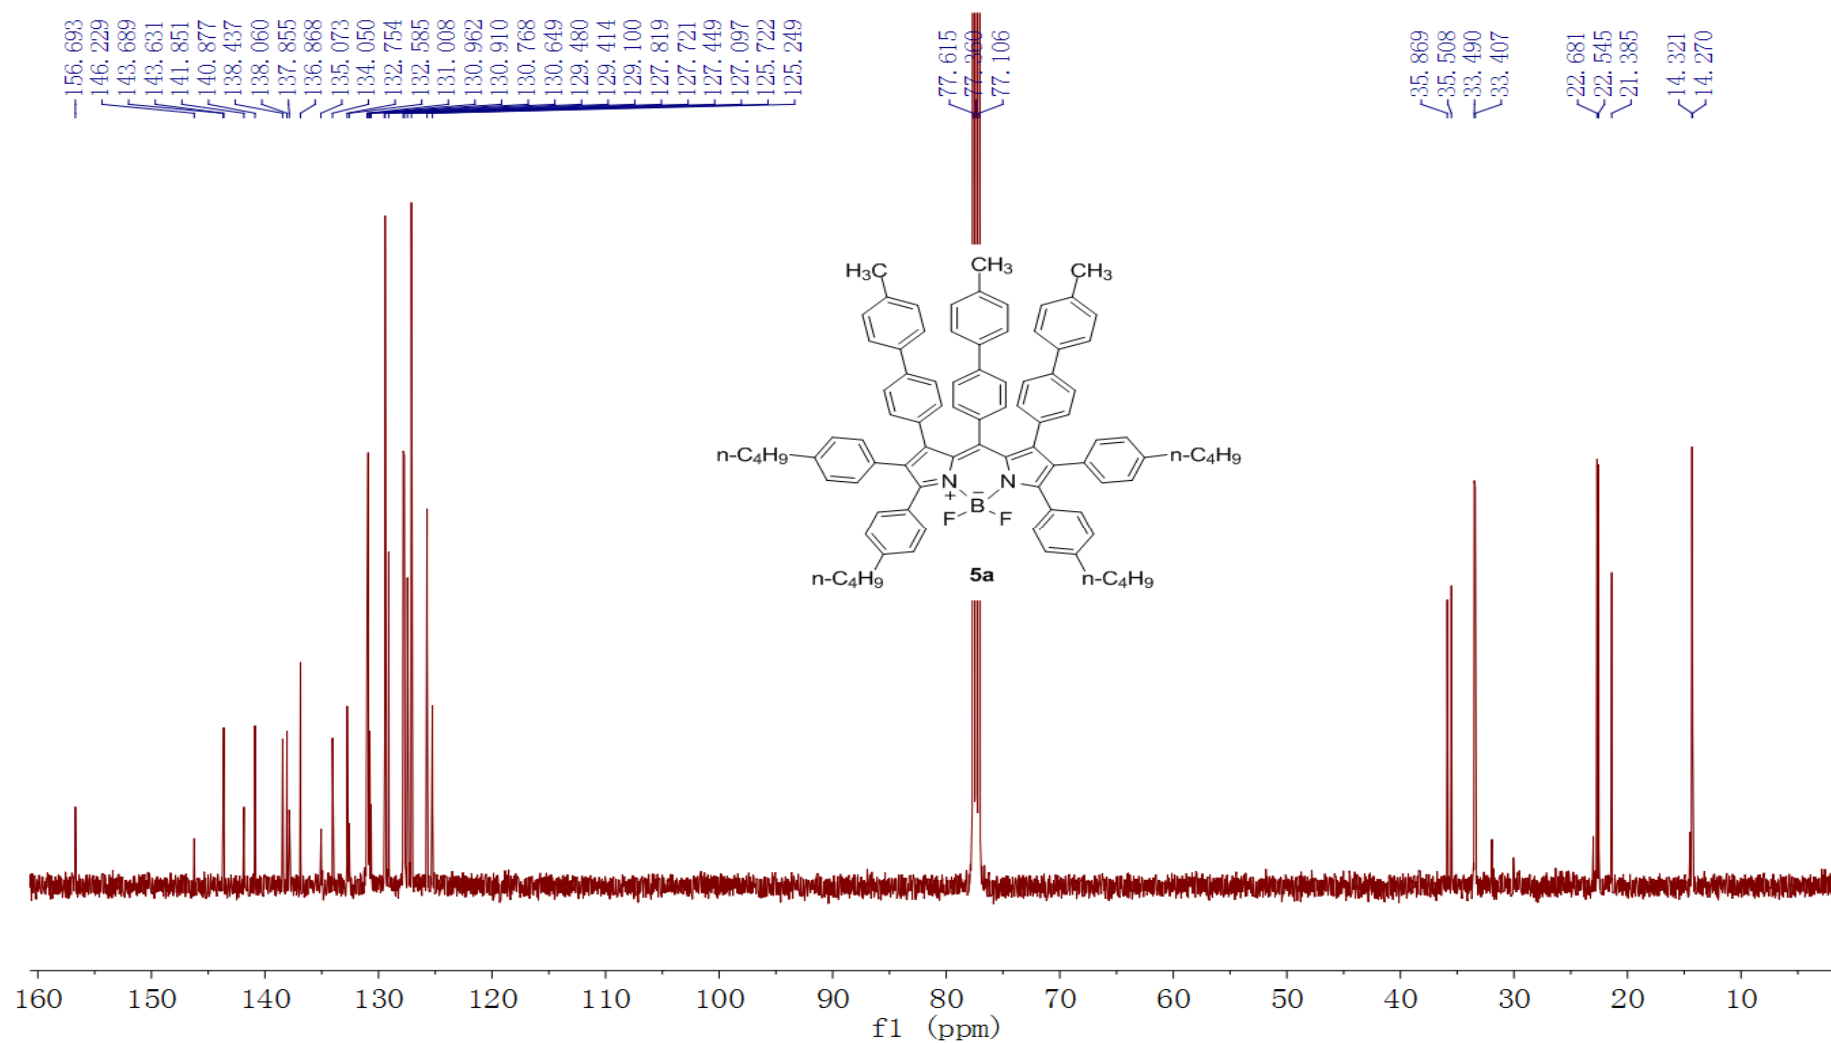

**Figure S87.** The  $^1\text{H}$  NMR spectra of **5b**.

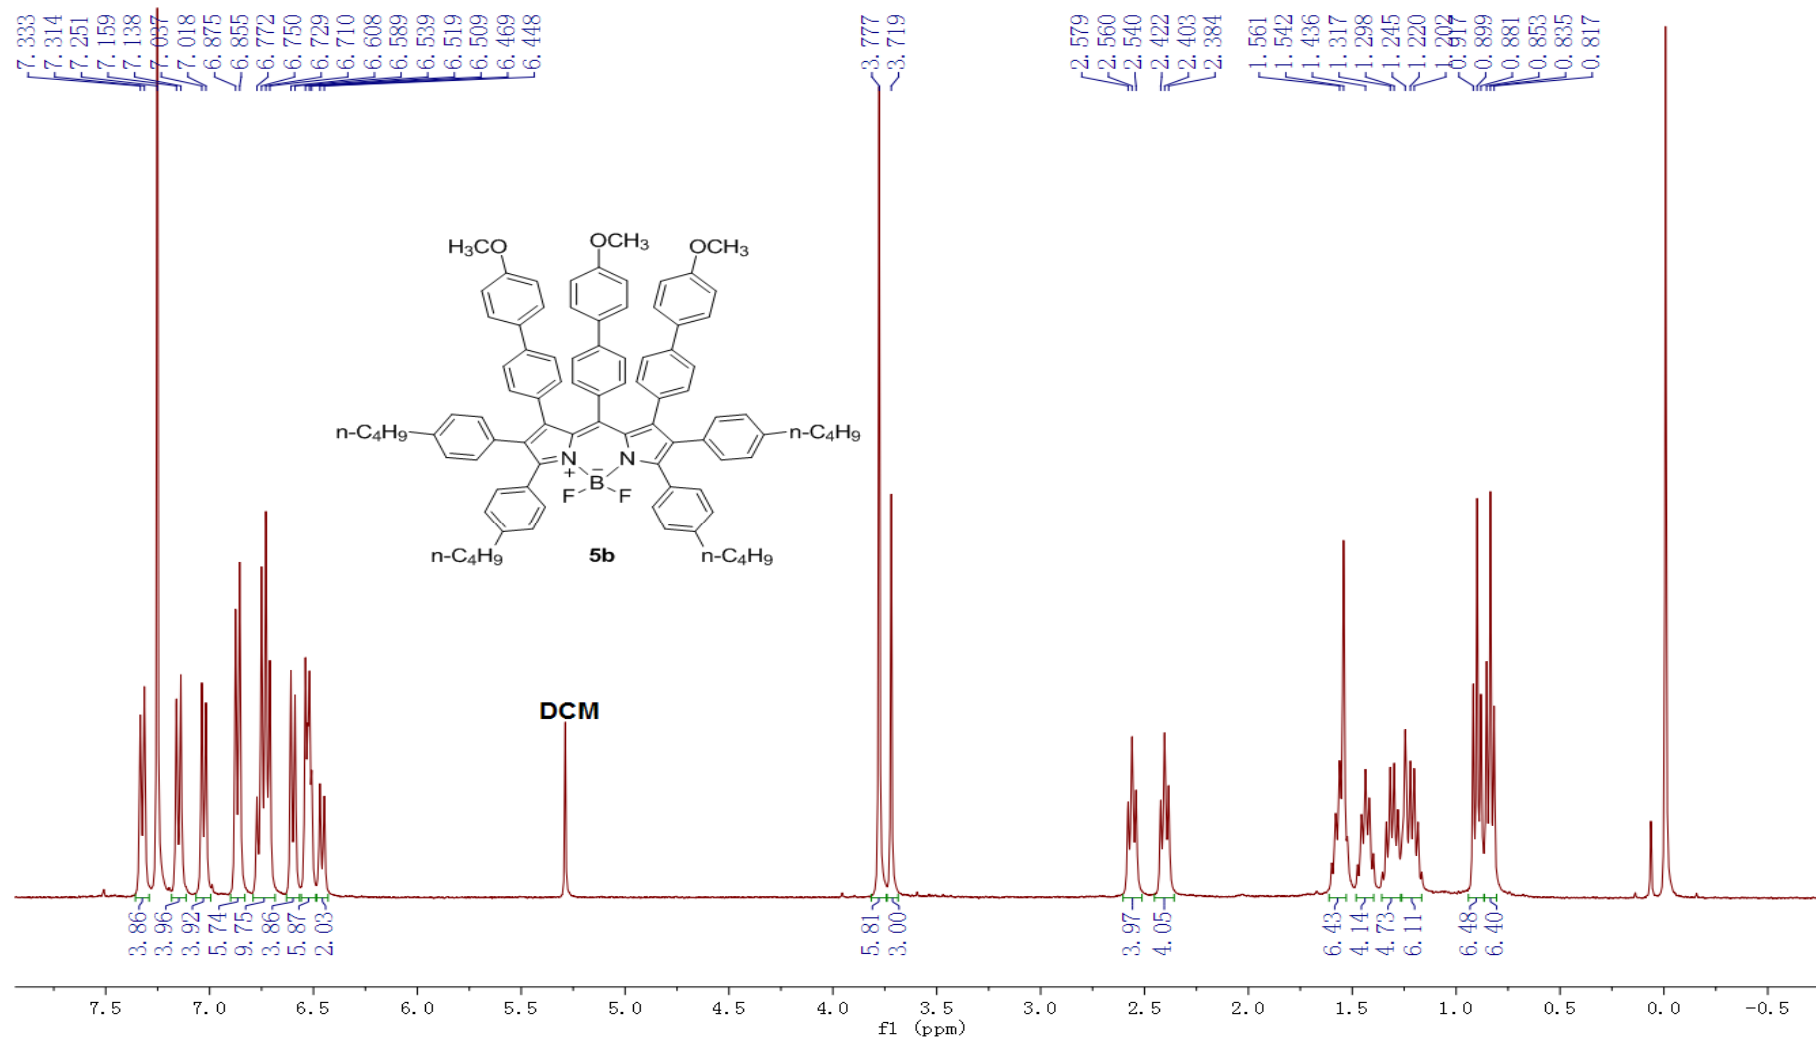

**Figure S88.** The  $^{13}\text{C}$  NMR spectra of **5b**.

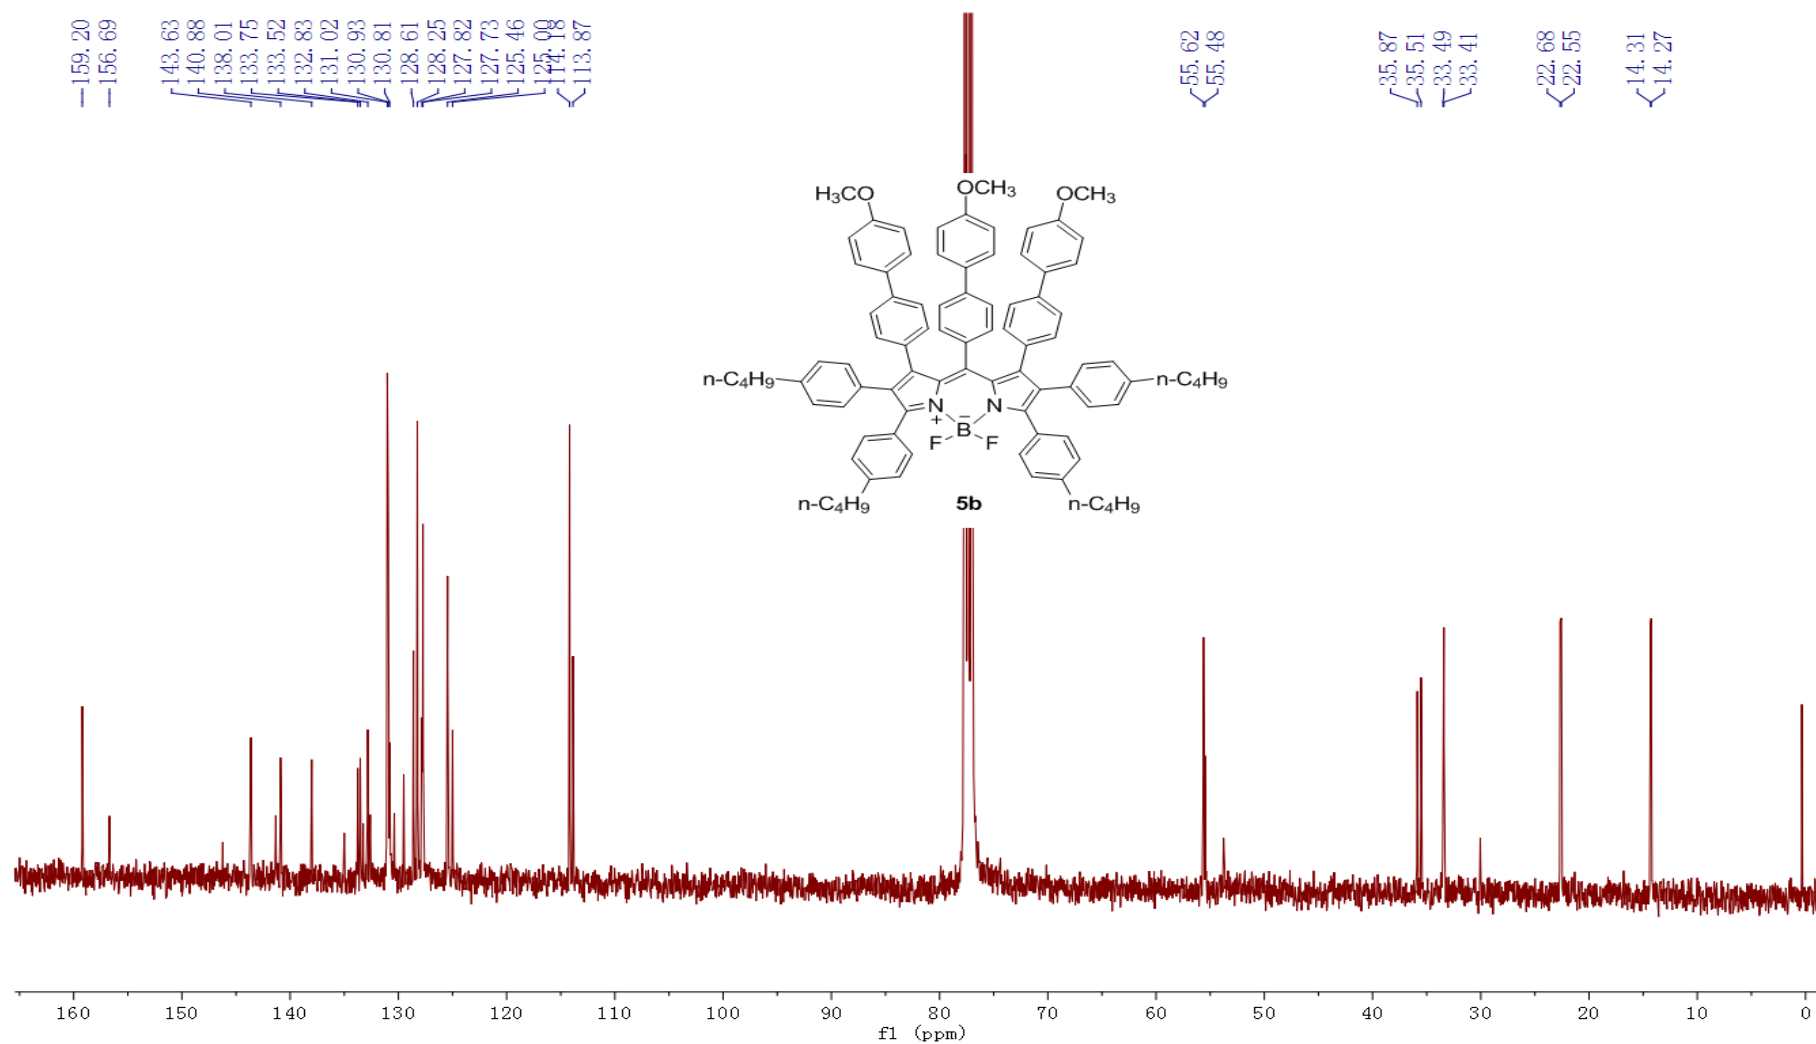

**Figure S89.** The  $^1\text{H}$  NMR spectra of **5c**.

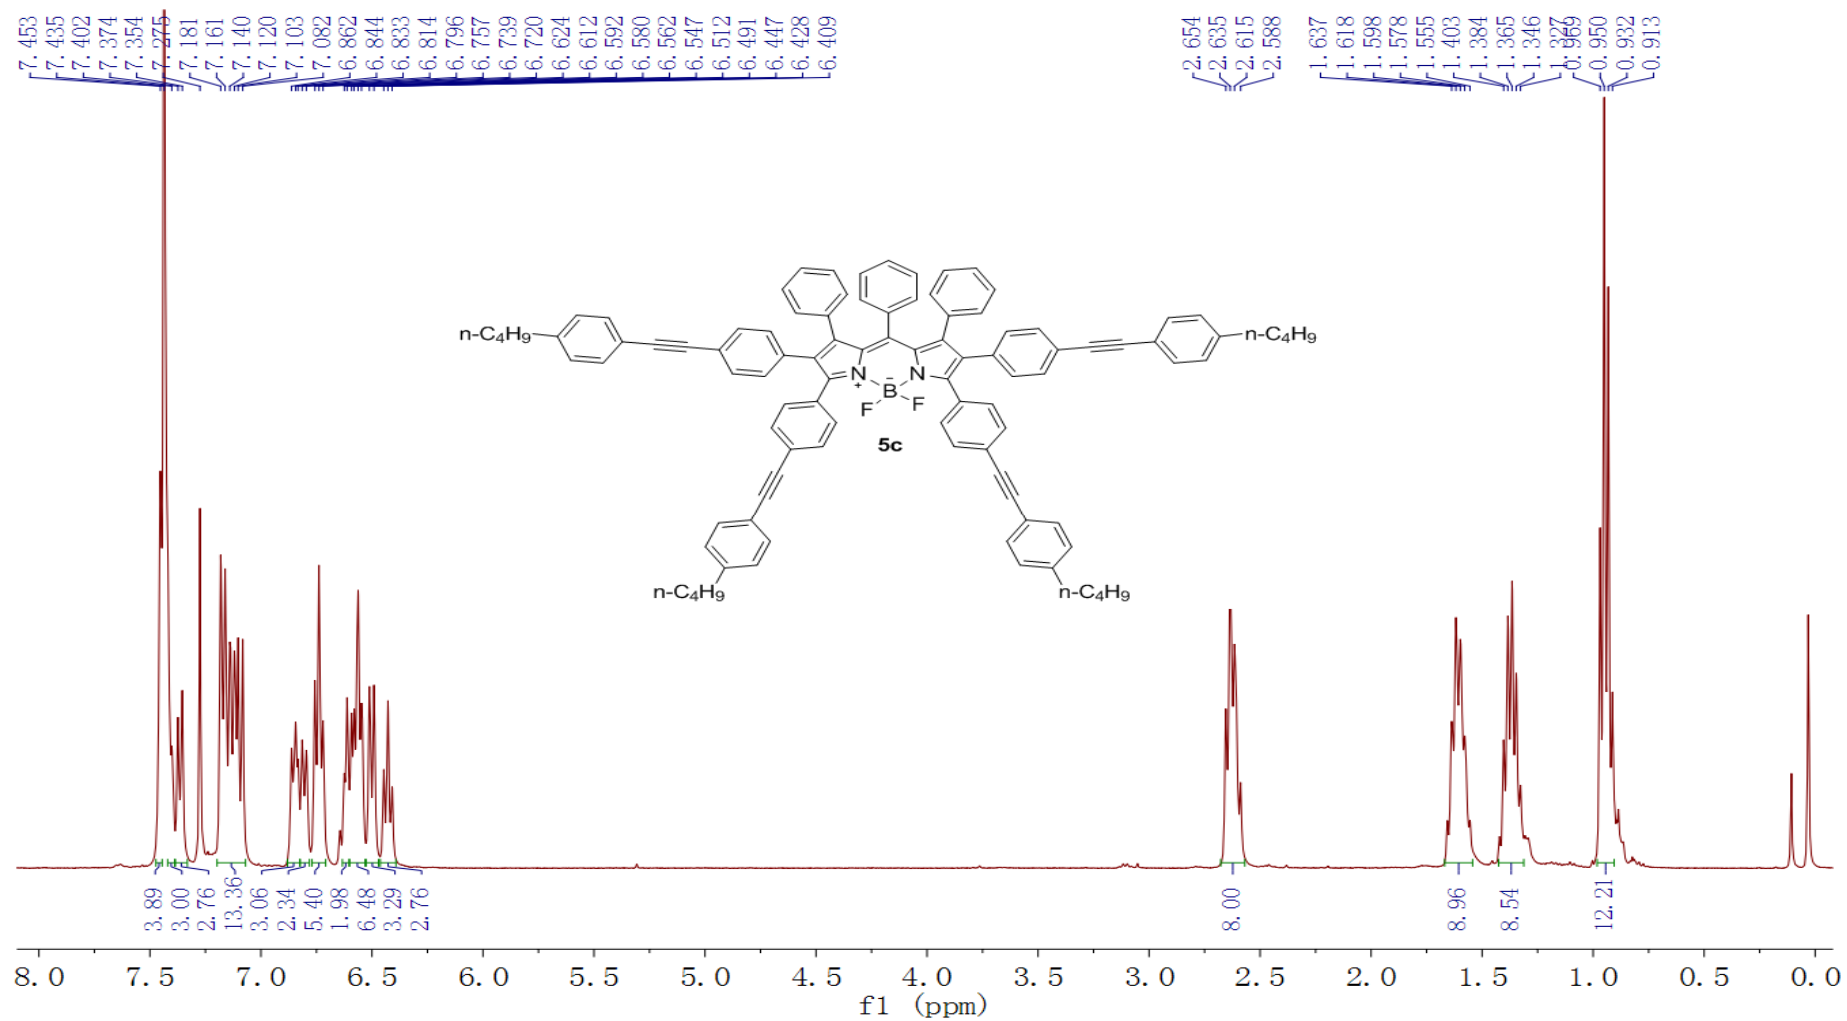



**Figure S90.** The  $^1\text{H}$  NMR spectra of **5d**.

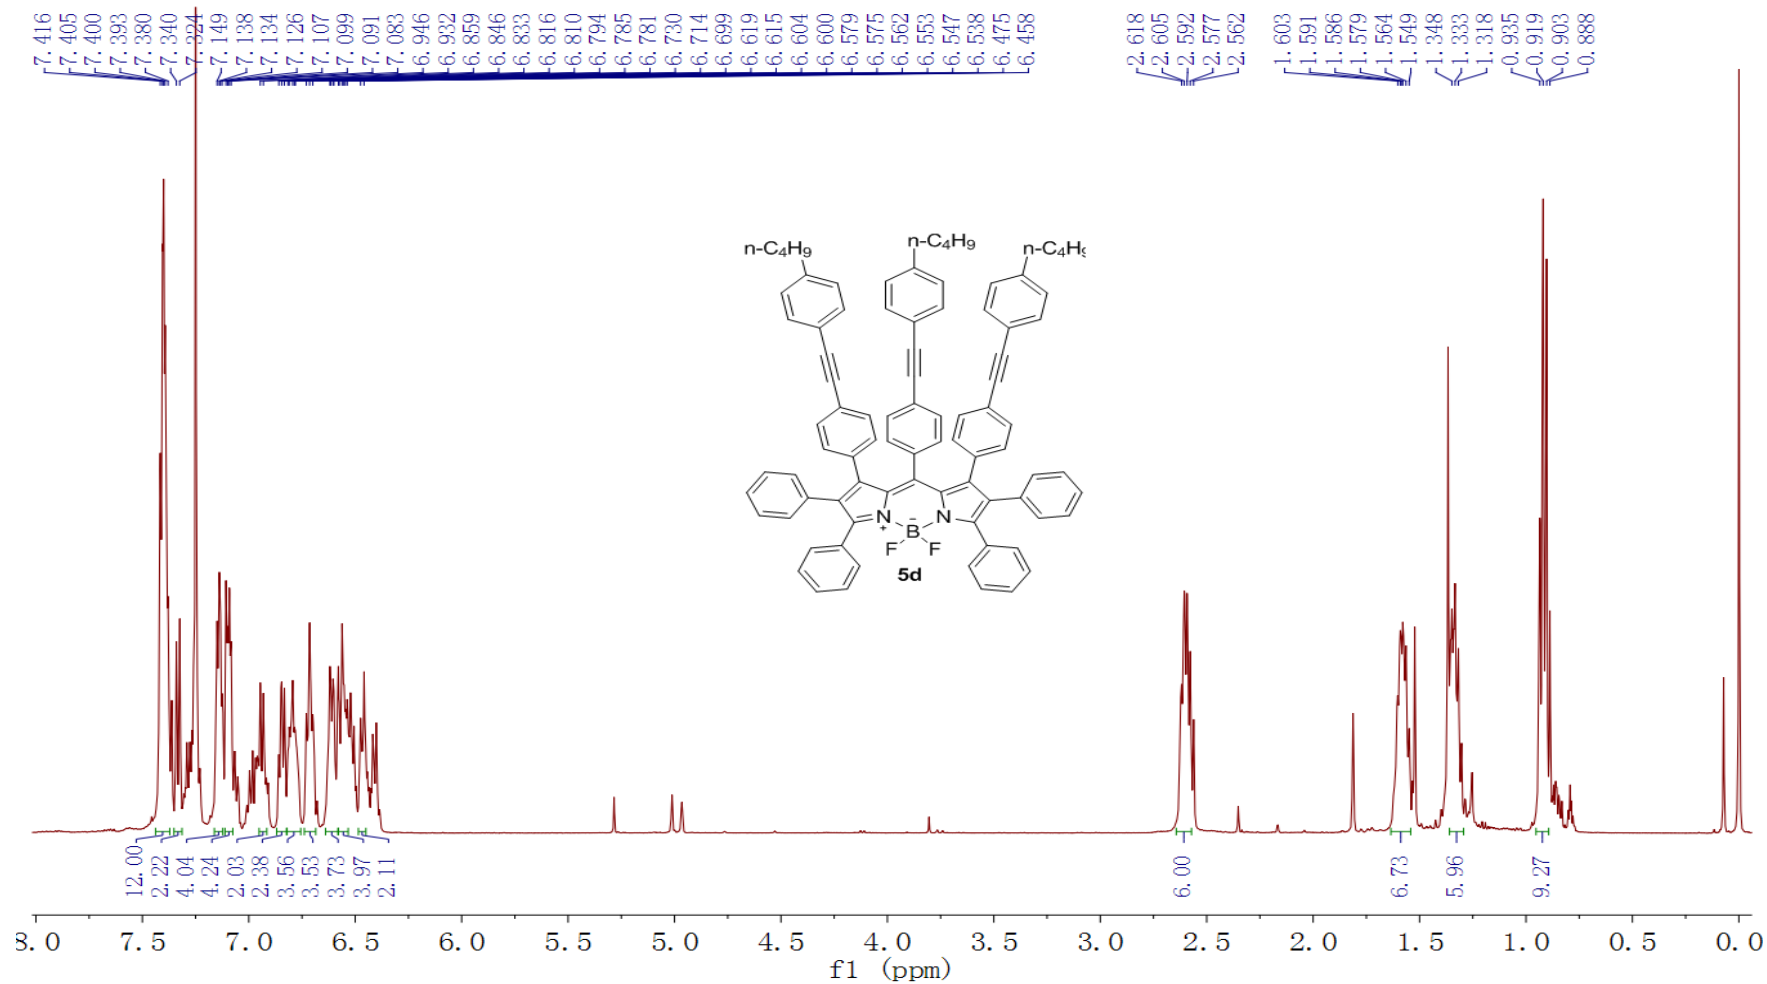

## 7. UV and FL of heptaaryldipyrromethenes and BODIPYs

**Table S2.** The photophysical properties of heptaaryldipyrromethenes and BODIPYs

| Entry     | Absorption                 |                       | Entry     | Absorption                 |                       | Emission                  |                            |                              |
|-----------|----------------------------|-----------------------|-----------|----------------------------|-----------------------|---------------------------|----------------------------|------------------------------|
|           | $\lambda_{\text{max}}$ /nm | $\epsilon$ (L/mol.cm) |           | $\lambda_{\text{max}}$ /nm | $\epsilon$ (L/mol.cm) | $\lambda_{\text{ex}}$ /nm | $\lambda_{\text{max}}$ /nm | $\Phi_{\text{F}}^{\text{a}}$ |
| <b>2a</b> | 542                        | 5600                  | <b>3a</b> | 570                        | 55800                 | 577                       | 604                        | 0.30                         |
| <b>2b</b> | 540                        | 4310                  | <b>3b</b> | 582                        | 74200                 | 590                       | 626                        | 0.15                         |
| <b>2c</b> | 560                        | 9150                  | <b>3c</b> | 581                        | 75000                 | 589                       | 619                        | 0.21                         |
| <b>2d</b> | 560                        | 8390                  | <b>3d</b> | 579                        | 62400                 | 585                       | 618                        | 0.22                         |
| <b>2e</b> | 564                        | 10600                 | <b>3e</b> | 591                        | 8300                  | 590                       | 635                        | 0.26                         |
| <b>2f</b> | 565                        | 12900                 | <b>3f</b> | 596                        | 18800                 | 600                       | 640                        | 0.17                         |
| <b>2g</b> | 559                        | 10900                 | <b>3g</b> | 588                        | 15000                 | 594                       | 627                        | 0.2                          |
| <b>2h</b> | 564                        | 7320                  | <b>3h</b> | 586                        | 42700                 | 596                       | 627                        | 0.26                         |
| <b>2i</b> | 558                        | 2130                  | <b>3i</b> | 580                        | 115000                | 591                       | 620                        | 0.21                         |
| <b>2j</b> | 547                        | 8740                  | <b>3j</b> | 568                        | 18900                 | 567                       | 600                        | 0.11                         |
| <b>2k</b> | 540                        | 6100                  | <b>3k</b> | 571                        | 44200                 | 571                       | 605                        | 0.07                         |
| <b>2l</b> | 542                        | 5800                  | <b>3l</b> | 568                        | 45200                 | 573                       | 601                        | 0.18                         |
| <b>2m</b> | 555                        | 12650                 | <b>3m</b> | 577                        | 42900                 | 584                       | 614                        | 0.21                         |
| <b>2n</b> | 550                        | 6890                  | <b>3n</b> | 572                        | 16200                 | 584                       | 606                        | 0.02                         |
| <b>4a</b> | 563                        | 8750                  | <b>5a</b> | 586                        | 36540                 | 589                       | 624                        | 0.23                         |
| <b>4b</b> | 564                        | 6890                  | <b>5b</b> | 587                        | 39630                 | 591                       | 625                        | 0.25                         |
| <b>4c</b> | 580                        | 8148                  | <b>5c</b> | 590                        | 48940                 | 586                       | 632                        | 0.15                         |
| <b>4d</b> | 564                        | 11640                 | <b>5d</b> | 585                        | 36210                 | 583                       | 625                        | 0.11                         |

a The relative quantum yield is measured based on Rhodamine 6G as external standard.

Rhodamine 6G was dissolved in freshly distilled EtOH and diluted to  $1 \times 10^{-5}$  mol/L. Heptaaryldipyrromethenes (**2a-2n** and **4a-4d**) and corresponding BODIPYs (**3a-3n** and **5a-5d**) were dissolved in freshly distilled DCM and diluted to  $1 \times 10^{-5}$  mol/L for absorption and emission measurement.

## 8. Absorbance of 2c-2i, 2l response to acidity

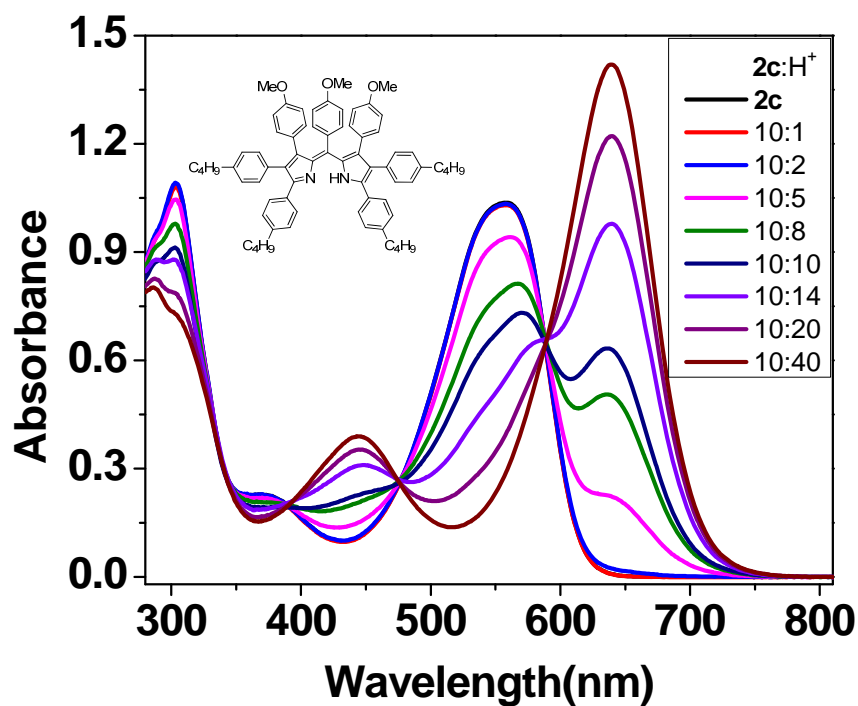

**Figure S91.** The UV absorption spectra of **2c** (the black line) and its response to increased  $H^+$  (the colored lines) in THF solution ( $10^{-5}$  M).

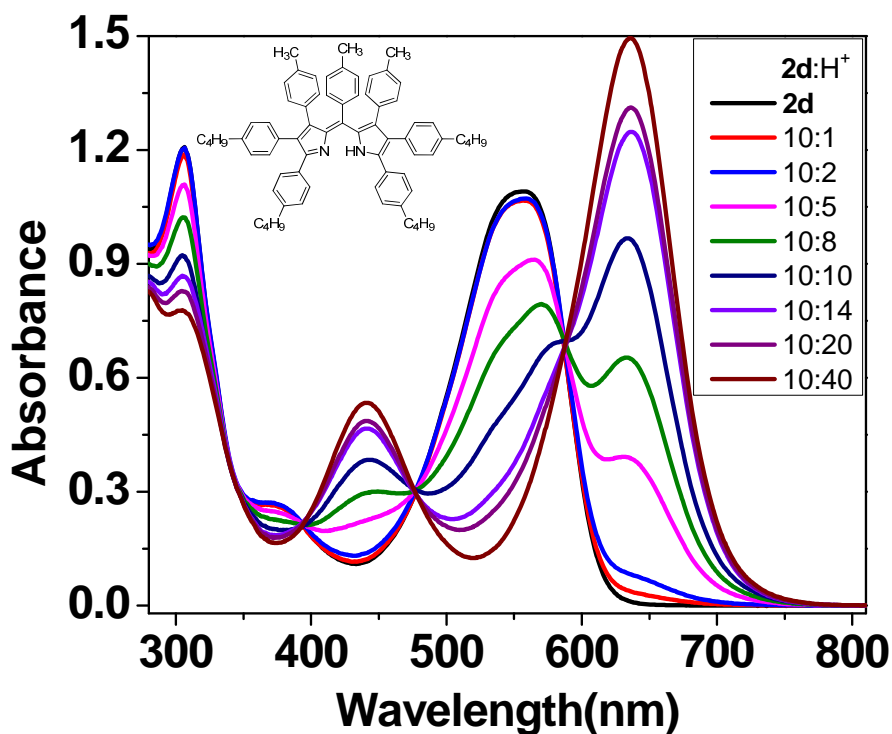

**Figure S92.** The UV absorption spectra of **2d** (the black line) and its response to increased  $H^+$  (the colored lines) in THF solution ( $10^{-5}$  M).

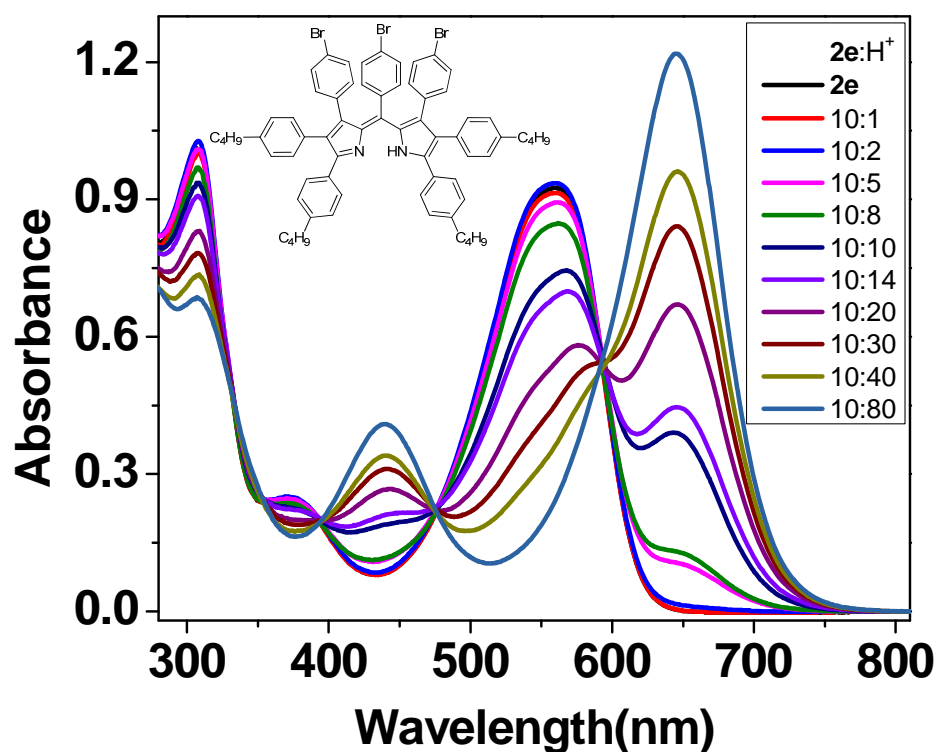

**Figure S93.** The UV absorption spectra of **2e** (the black line) and its response to increased  $H^+$  (the colored lines) in THF solution ( $10^{-5}$  M).

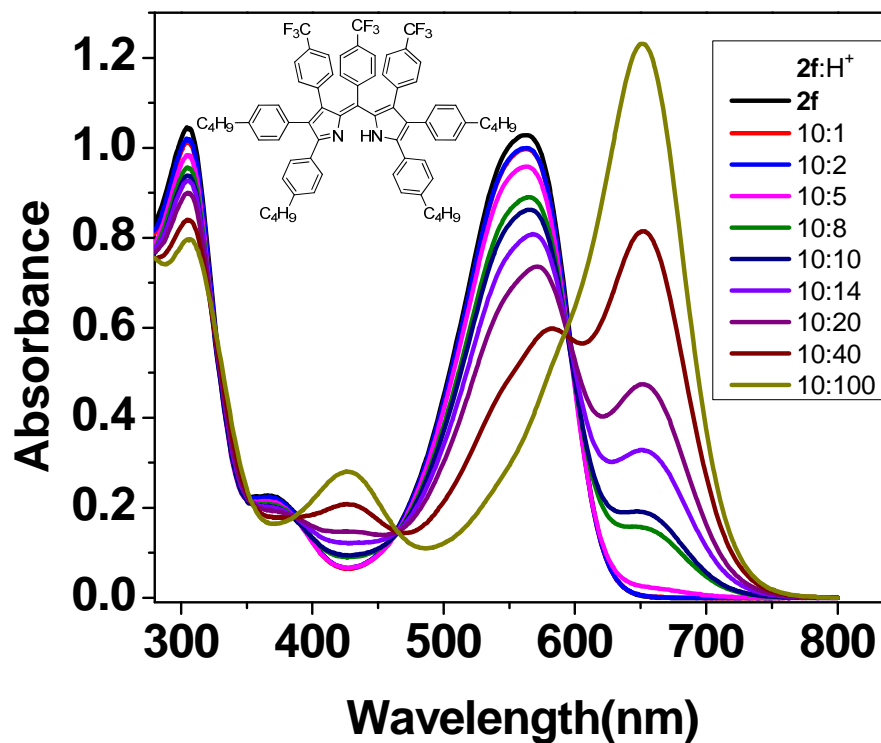

**Figure S94.** The UV absorption spectra of **2f** (the black line) and its response to increased  $H^+$  (the colored lines) in THF solution ( $10^{-5}$  M).

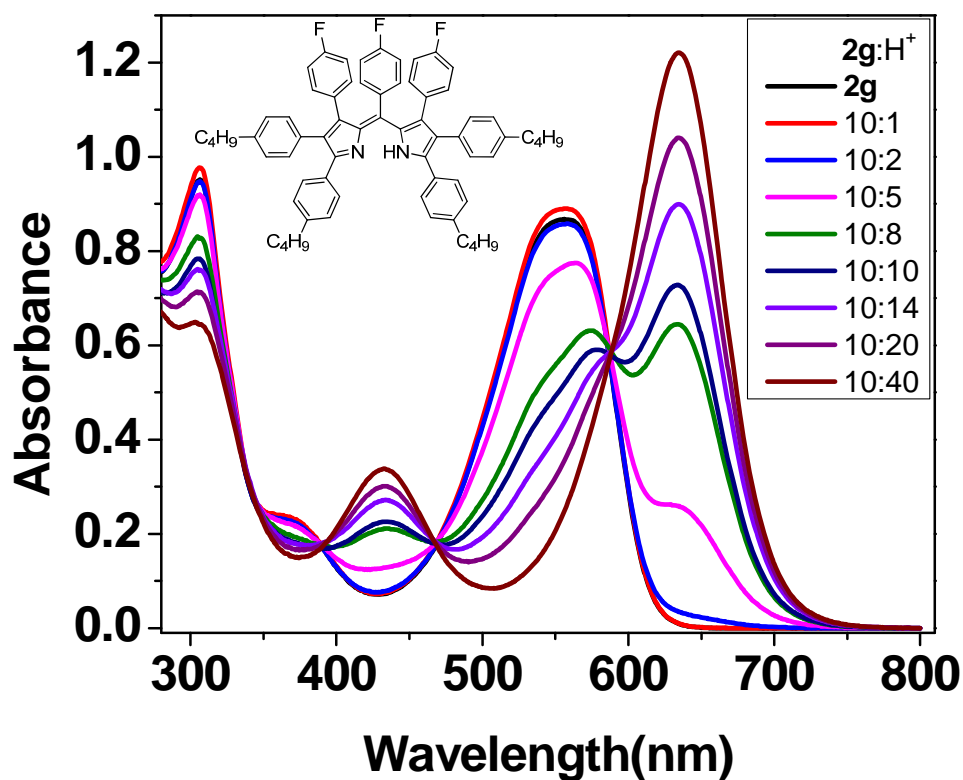

**Figure S95.** The UV absorption spectra of **2g** (the black line) and its response to increased  $H^+$  (the colored lines) in THF solution ( $10^{-5}$  M).

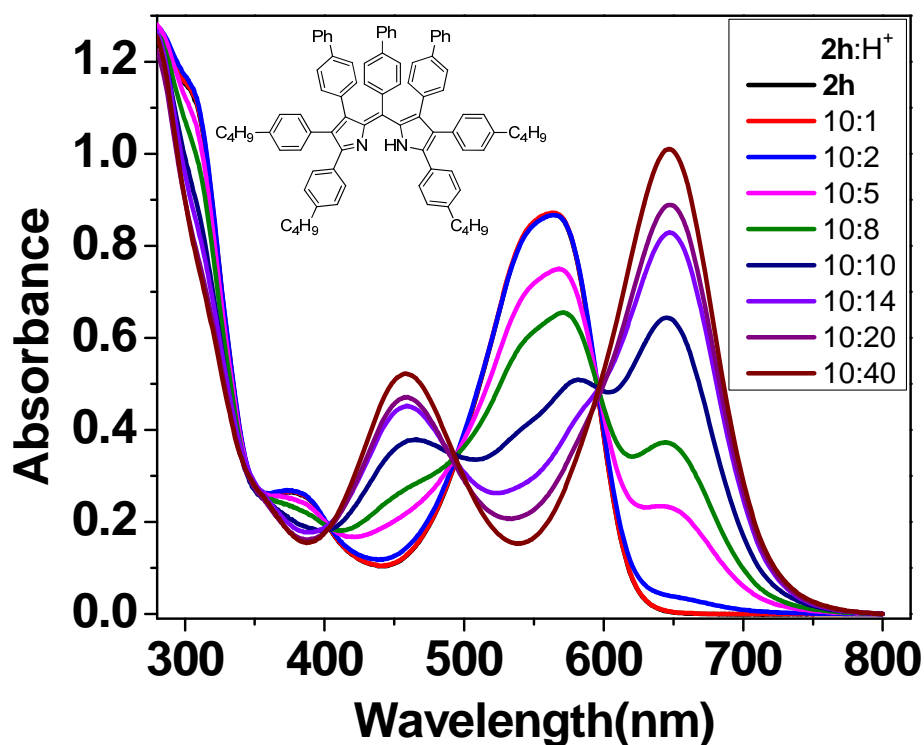

**Figure S96.** The UV absorption spectra of **2h** (the black line) and its response to increased  $H^+$  (the colored lines) in THF solution ( $10^{-5}$  M).

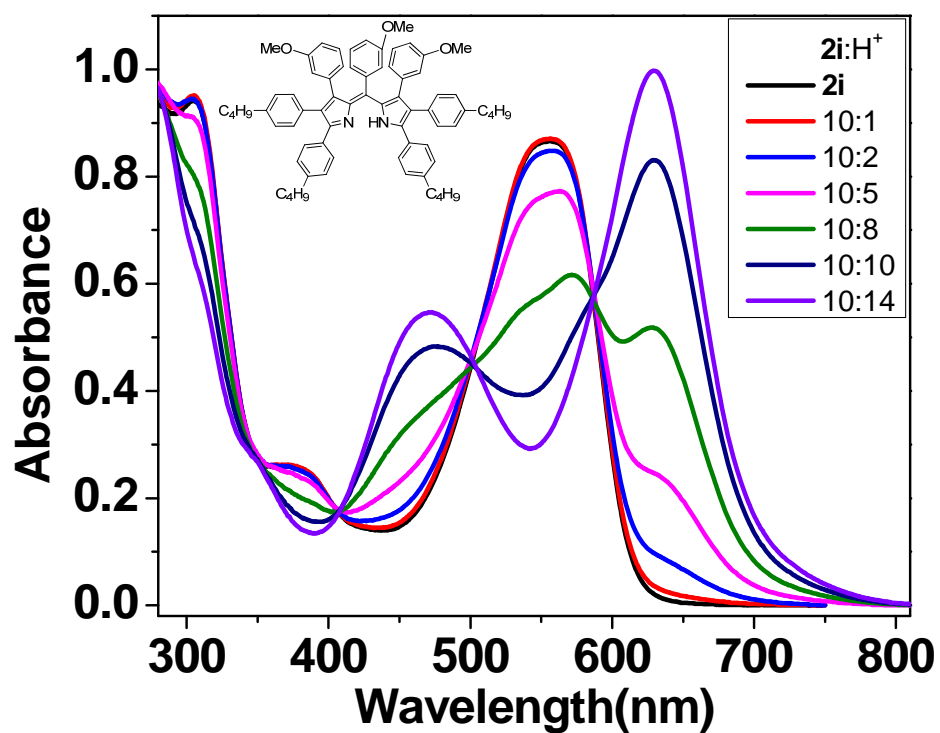

**Figure S97.** The UV absorption spectra of **2i** (the black line) and its response to increased  $H^+$  (the colored lines) in THF solution ( $10^{-5}$  M).

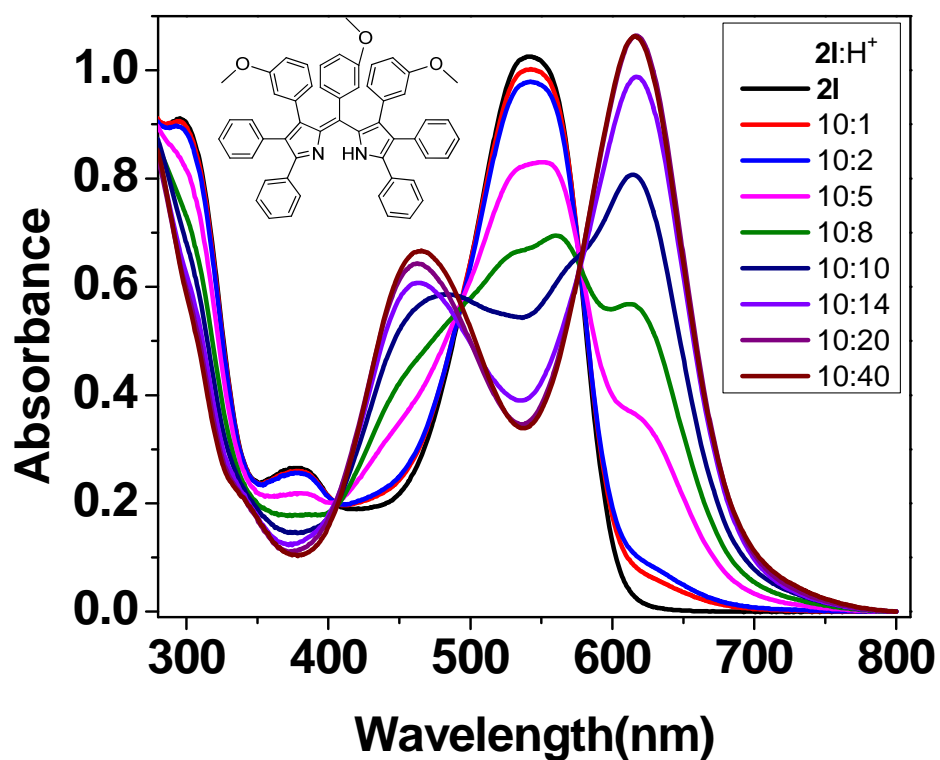

**Figure S98.** The UV absorption spectra of **2l** (the black line) and its response to increased  $H^+$  (the colored lines) in THF solution ( $10^{-5}$  M).
